# Supplementary material for: Discovery of an ancient MHC category with both class I and class II features
Source: PubMed Central journal article supplement (PMC8713811; doi:10.1073/pnas.2108104118), 2021-12-13
Supplement: pnas.2108104118.sapp.pdf [file pnas.2108104118.sapp.pdf]

## Supplementary Information

### Discovery of an ancient MHC category with both class I and class II features

Kazuhiko Okamura\*, Johannes M. Dijkstra\*, Kentaro Tsukamoto\*, Unni Grimholt, Geert F. Wiegertjes, Akiko Kondow, Hisateru Yamaguchi, Keiichiro Hashimoto§

\*These authors contributed equally to this work.

§corresponding author. E-mail: keihashi@fujita-hu.ac.jp (K.H.)

#### Contents of Supplementary Information

| Page |                                                                                                                                                            |
|------|------------------------------------------------------------------------------------------------------------------------------------------------------------|
| 2    | Materials and Methods                                                                                                                                      |
| 7    | Appendix                                                                                                                                                   |
|      | 1. Overview of W-category genes                                                                                                                            |
| 10   | 2. Identification of W-category genes                                                                                                                      |
| 28   | 3. Southern blot analyses of the banded houndshark W-category genes                                                                                        |
|      | 4. Banded houndshark W-category genes are expressed in various tissues                                                                                     |
|      | 5. Variation of W-category molecules                                                                                                                       |
| 32   | 6. Conserved features at the I $\alpha$ 3/ $\beta$ 2-m interface                                                                                           |
|      | 7. $\beta$ 2-m K67 can form an intra-domain hydrogen bond                                                                                                  |
|      | 8. Linkage between the banded houndshark $\beta$ 2-m gene and the <i>Mhc</i> region                                                                        |
| 33   | 9. Specific interaction between WA and WB                                                                                                                  |
| 34   | 10. Conservation profile of the teleost fish W-category membrane-distal domains and molecular modeling of the extracellular domains of W-category molecule |
| 71   | 11. Additional explanations for Fig. S5                                                                                                                    |
| 73   | 12. Notes for Datasets                                                                                                                                     |
| 76   | 13. Detailed Author Contributions                                                                                                                          |
| 77   | Figs. S1 to S23                                                                                                                                            |
| 121  | Tables S1 to S4                                                                                                                                            |
| 130  | References (1-91)                                                                                                                                          |
| 138  | Representative W-category sequences in FASTA format                                                                                                        |

## Materials and Methods

**Animals.** Banded houndshark (*Triakis scyllium*) individuals were obtained as described in a previous paper (17). Zebrafish (*Danio rerio*) were obtained from the Zebrafish National BioResource Project, Laboratory for Developmental Gene Regulation, RIKEN Brain Science Institute (Wako, Saitama, Japan). Goldfish (*Carassius auratus*), Mexican tetra (*Astyanax mexicanus*), West African lungfish (*Protopterus annectens*) and tiger salamander (*Ambystoma tigrinum*) were all obtained from Meitosuien Co. Ltd. (Nagakute, Aichi, Japan). All animals were handled according to the Guidelines for the Management of Laboratory Animals in Fujita Health University.

**DNA and RNA.** The isolation of the genomic DNA of banded houndshark was described in a previous paper (17). For banded houndshark, total RNA was isolated from kidney, spleen, liver and blood using ISOGEN (Nippon Gene, Tokyo, Japan) or TRIzol (Invitrogen, Thermo Fisher Scientific, Waltham, MA, USA). For the other animal species, total RNA was isolated from various tissues (gills of goldfish and Mexican tetra; anterior half of zebrafish; kidney of West African lungfish; internal organs of tiger salamander) using TRIzol. Total RNA was used for RACE and RT-PCR experiments.

**Genomic and cDNA libraries.** The construction of a genomic library of banded houndshark (individual N0) was described previously (23). In the present study, an additional genomic library was constructed by partial digestion of banded houndshark (individual N0) red blood cell DNA with *Sau3AI*. The construction of a cDNA library of banded houndshark (individual N2) was described previously (17). The primers used to amplify and prepare various probes to screen the libraries are listed in Table S2.

**RACE reactions.** RACE reactions were conducted to obtain sequence information for 5'- and 3'-UTRs of relevant genes using SMART RACE cDNA Amplification Kit (Clontech, Takara Bio USA, Mountain View, CA, USA), SMARTer RACE cDNA Amplification Kit (Clontech) and GeneRacer Kit (Invitrogen). RACE-PCR was conducted to obtain entire coding regions of relevant genes using Advantage 2 Polymerase (Clontech, Takara Bio USA, Mountain View, CA, USA) with SMART RACE cDNA Amplification Kit, Advantage 2 Polymerase or Ex Taq DNA polymerase (Takara Bio Inc., Shiga, Japan) with SMARTer RACE cDNA Amplification Kit, and Ex Taq DNA polymerase with GeneRacer Kit.

**PCR.** The primer sequences used in PCR and RT-PCR are listed in Table S2. To obtain the coding sequences of banded houndshark *WA\_DS5*, *WB\_DS1* and *WB\_DS3* genes, total kidney RNA (individual N1) was reverse-transcribed into cDNA using ReverTra Ace (TOYOBO, Osaka, Japan). In case of banded houndshark *WA\_DS10*, Prime Script II High Fidelity RT-PCR kit (Takara) was used to reverse-transcribe RNA into cDNA. The coding sequences were amplified from cDNA using specific primers designed at 5' and 3' UTRs. PCR reactions were conducted using Ex Taq HS DNA polymerase (Takara) with 35 cycles and PCR products were cloned into pGEM-T Easy vector (Promega, Madison, WI, USA). In case of *WA\_DS10*, PCR reactions were conducted using Prime STAR GXL DNA polymerase (Takara) with 32 cycles and PCR products were cloned into Bluescript vectors (Stratagene, Agilent Technologies, CA, USA) as described previously (23).

The genomic sequences of banded houndshark *WA\_DS5* and *WA\_DS10* genes were amplified from genomic DNA (individual N1) using specific primers designed at 5' and 3' UTRs. A partial genomic sequence containing the  $\beta 2$  domain exon of banded houndshark *WB\_DS1* gene (individual N0) was reported previously (23; M85291) whereas part of the upstream intron region was additionally determined in the present study (LC200978). The CP/TM/CY region sequence of the banded houndshark *WB\_DS1* gene was amplified from genomic DNA (individual N1) using specific primers derived from  $\beta 2$  domain and 3' UTR regions, and was determined in the present study (LC009542). The genomic sequence of 10.9 kb, which contains the first four exons of the banded houndshark *WB\_DS3* gene, was determined using a  $\lambda$  phage clone isolated from a genomic library of banded houndshark individual N0. The genomic sequence of 4.5 kb, which contains the last three exons of the banded houndshark *WB\_DS3* gene, was amplified from genomic DNA of banded houndshark individual N0 using specific primers derived from intron 4 and 3' UTR regions.

PCR conditions for amplification of genomic *WA\_DS5*, *WA\_DS10* and *WB\_DS3* were as follows: denaturation at 94°C for 2 min, 5 cycles of denaturation at 98°C for 10 sec, annealing and elongation at 74°C for 10 min, 5 cycles of denaturation at 98°C for 10 sec, annealing and elongation at 72°C for 10 min, 5 cycles of denaturation at 98°C for 10 sec, annealing and elongation at 70°C for 10 min, 40 cycles of denaturation at 98°C for 10 sec, annealing and elongation at 68°C for 10 min and final elongation at 68°C for 7 min with KOD Fx Neo DNA polymerase (TOYOBO). PCR conditions for amplification of genomic *WB\_DS1* were as follows: denaturation at 94°C for 2 min, 5 cycles of denaturation at 98°C for 10 sec, annealing and elongation at 74°C for 20 min, 5 cycles of denaturation at 98°C for 10 sec, annealing and elongation at 72°C for 20 min, 5 cycles of denaturation at 98°C for 10 sec, annealing and elongation at 70°C for 20 min, 40 cycles of denaturation at 98°C for 10 sec, annealing and elongation at 68°C for 20 min and final elongation at 68°C for 7 min with KOD Fx Neo DNA polymerase (TOYOBO). The PCR products were cloned into pCR-XL-TOPO vector (Invitrogen) or used as templates for direct sequencing.

For the isolation of the teleost fish and lungfish W-category genes, SuperScript III reverse transcriptase kit (Invitrogen) with random hexamer primers was used to construct cDNA. RT-PCR was conducted using Ex Taq DNA polymerase (Takara) with 40 or less PCR cycles. For isolation of tiger salamander W-category genes, RACE reactions were conducted using GeneRacer Kit and the entire coding sequences were amplified using Prime STAR HS DNA polymerase (Takara) with 35 cycles. PCR products were cloned into Bluescript vectors as described previously (23).

For linkage analyses of the banded houndshark *WB\_DS10* gene using *HhaI* digestion, PCR conditions for amplification using DS10-2 and DS10-8 primers were as follows: denaturation of genomic DNA at 94 °C for 1 min, 40 cycles of denaturation at 94 °C for 30 sec, annealing at 60 °C for 30 sec and elongation at 72 °C for 4 min, and final elongation at 72 °C for 5 min with LA-Taq HS DNA polymerase (Takara). For linkage analyses using DS10-6 and DS10-14 primers, PCR conditions were the same as above except for using 35 cycles. For linkage analyses of the banded houndshark  $\beta_2$ -m gene, PCR conditions for amplification using  $\beta_2$ -m-F11 and  $\beta_2$ -m-R10 primers were as follows: denaturation of genomic DNA at 98 °C for 10 sec, 50 cycles of denaturation at 98 °C for 10 sec, annealing at 61 °C for 15 sec and elongation at 72 °C for 5 min, and final elongation at 72 °C for 10 min with Prime STAR DNA polymerase (Takara).

Expression of the banded houndshark *WA* and *WB* genes was studied using RT-PCR using RNA from spleen, kidney, liver and blood (individual N1) and two gene-specific primers, using Prime Script II High Fidelity RT-PCR Kit (Takara). RT-PCR conditions were as follows: denaturation at 98 °C for 1 min, 27, 32, 37 or 42 cycles of denaturation at 98 °C for 10 sec, annealing at 60 °C for 15 sec and elongation at 68 °C for 3 min, and final elongation at 68 °C for 5 min with Prime STAR GXL DNA polymerase (Takara). As a control gene, banded houndshark  $\beta$ -actin gene (39) was used under the following RT-PCR conditions: denaturation at 98 °C for 1 min, 16, 19, 22 or 27 cycles of denaturation at 98 °C for 10 sec, annealing at 60 °C for 15 sec and elongation at 68 °C for 3 min, and final elongation at 68 °C for 3 min with Prime STAR GXL (Takara Bio Inc., Shiga, Japan). In some experiments, RT-PCR conditions were slightly different (protocol No. 2) and as follows: denaturation at 98 °C for 30 sec, 35 cycles of denaturation at 98 °C for 10 sec, annealing and elongation at 60 °C for 3 min, and final elongation at 72 °C for 3 min with Ex Taq HS DNA polymerase (Takara).

Variations in the cDNA sequences of zebrafish *WA* and *WB* genes were studied with RT-PCR using RNA from anterior halves of adult zebrafish of various strains: AB, India (IND), TL and WIK. PCR reactions were conducted using Ex Taq DNA polymerase (Takara) with 40 or less PCR cycles.

**Sequencing.** Sequencing reactions were performed with BigDye Terminator v3.1 Sequencing Standard kit (Applied Biosystems), and nucleotide sequences were determined using 3100Avant/3130xl Genetic Analyzer (Applied Biosystems Life Technologies, Foster City, CA, USA). The DNA sequence of one genomic phage clone of *WB\_DS3* was also determined using the above sequencing method. For the sequence determination of PCR products, various techniques including independent PCR reactions, analyses of multiple independent clones, PCR with different sets of primers and direct sequencing reactions were used to eliminate possible PCR and sequencing errors.

In the initial phase of our study, radio-labeled methods were used for sequencing PCR-amplified genomic DNA fragments and clones from genomic libraries and from cDNA libraries.

**Southern blot analyses.** Southern blot analyses for the linkage analyses of banded houndshark *WA\_DS5*, *WB\_DS1* and *WB\_DS3* (Figs. S9 and S10) were performed essentially as described previously (17). Briefly, 5 µg of DNA digested with a restriction enzyme was electrophoresed through an agarose gel (0.8 %) and blotted onto a nylon membrane. The restriction enzymes used for the experiments for the analyses of *WA\_DS5*, *WB\_DS1* and *WB\_DS3* were *Bam*HI, *Stu*I and *Bam*HI, respectively. After hybridization with the specific radio-labeled probes, membranes were finally washed with 0.1 x SSC/0.05 % SDS at 42° C for 30 min and autoradiographs were obtained. Southern blot analyses for banded houndshark individual N1 (Fig. S3 and *SI Appendix*) were performed with the DIG system using the PCR DIG Probe Synthesis Kit and the DIG Luminescent Detection Kit (Roche Applied Science).

**Linkage analyses.** As described above, the linkage analyses of the banded houndshark *WA\_DS5*, *WB\_DS1* and *WB\_DS3* genes (Figs. S9 *A*, *C* and *D*, respectively) were performed using gene-specific probes (Table S2) for Southern blot hybridization. Restricted by the limited amount of genomic DNA available, PCR-based methods was used for linkage analysis of banded houndshark *WA\_DS10* (Fig. S9*B*) with PCR conditions described above. DNA fragments amplified with the primers DS10-2 and DS10-8 (for primer sequences, see Table S2) were digested with the restriction enzyme *Hha*I to look for haplotype differences within the seventeen littermate banded houndshark individuals (Fig. S9*B* left). Amplification of *WA\_DS10* gene with another set of primers, DS10-6 and DS10-14, was also conducted (Fig. S9*B* right). For linkage analyses of the banded houndshark  $\beta_2$ -*m* gene, PCR-based amplification was also performed using primers  $\beta_2$ -*m*-F11 and  $\beta_2$ -*m*-R10. Obtained DNA fragments were digested with *Mbo*II restriction enzyme (Fig. S15*A*; *SI Appendix* section 8).

**Database searches.** Database searches with annotation keywords and similarity searches were conducted using programs such as BLASTN, BLASTP and TBLASTN at NCBI (National Center for Biotechnology Information) (40) or Ensembl (41) Web sites. Specifically for sequence information of little skates and salamanders, SkateBase (42) and SalSite (43) were also used, respectively.

**Analyses of DNA and amino acid sequences.** The nucleotide sequences that were determined by experiments and sequences retrieved from databases were handled and analyzed with Genetyx software ver. 12 (Genetyx Co. Ltd. Tokyo). For prediction of protein-coding regions in genomic sequences, comparisons with matching cDNA sequences were performed and GENSCAN (44) and FGESH (45) programs were also used. For prediction of signal peptides, SignalP 4.1 Server (46) was used. For prediction of secondary structures of protein sequences, JPred4 (47) was used.

**Alignments of amino acid sequences.** Alignments of amino acid sequences were performed with MUSCLE program (48) and also with Genetyx software. Alignments were adjusted based on the previously reported studies (22, 23, 25, 49) and on structural comparisons using the UCSF Chimera package (50). For alignment of the membrane-distal domains of W-category molecules, the positions of conserved and variable residues of the teleost fish W-category molecules were used to compare with other MHC molecules.

**Phylogenetic tree analyses.** Phylogenetic tree analyses of the MHC Ig-like C1-set domains were conducted with Maximum Likelihood, a tree-searching method, in MEGA6 (51). The best combination of evolutionary model and rates was selected from 56 different amino acid substitution models or from 24 nucleotide substitution models using the log likelihood, and models with the lowest BIC (Bayesian Information Criterion) were considered to describe the substitution pattern the best in MEGA6. For the amino acid sequence analyses, the WAG+G+I model (see below for the abbreviations) was selected and for the DNA sequence analyses, the GTR+G+I model was selected using MEGA6. Abbreviations are as follows: WAG, Whelan And Goldman model (52); +G, a discrete Gamma distribution used to model evolutionary rate differences among sites with

5 rate categories; +I, assuming that a certain fraction of sites are evolutionarily invariable; GTR, General Time Reversible model (53). For the analyses shown in Fig. S19, Neighbor Joining (54), which is an algorithmic method, was conducted in MEGA6. With this method, the JTT (Jones-Taylor-Thornton) matrix model (55) or the p-distance model (53) were used.

Partial deletion was used in the analyses and the tree is drawn to scale, with branch lengths measured in the number of substitutions per site. Reliability of a tree was estimated using Bootstrap method (56) with 1000 bootstrap replications. Percentage of replicate trees in the bootstrap test are indicated next to the nodes (Values of 50 or greater are shown).

For the outgroups in the phylogenetic analyses, Ig-like C1-set domains of three molecules were used: Ig M<sub>CH4</sub> domain (previously used in ref. 28), TCR  $\beta$  chain constant domain (previously used in ref. 10) and tapasin Ig-like domain (e. g., 57) of human and house mouse. The alignments of the outgroup sequences with MHC domains (Dataset S2) were based on previous amino acid sequence comparisons (e. g., 57) and on structural comparisons with the reported structures of mouse IgM (PDB ID: 4JVW), human TCR  $\beta$  chain (PDB ID: 1OGA), and human tapasin (PDB ID: 3F8U) using the Chimera program. The regions between the  $\beta$ -strand-forming sequence blocks which show high sequence-length variation were not included for the comparison and the relevant regions were described in *SI Appendix*.

In Fig. 7, phylogenetic tree analyses are shown with amino acid sequences of Ig-like domains of selected W-category and MHC class I and class II molecules using Maximum Likelihood. In Supplementary Information, additional phylogenetic tree analyses of Ig-like domains are shown as follows: analyses with DNA sequences of selected W-category and MHC class I and class II molecules using Maximum Likelihood (Fig. S16); analyses with amino acid sequences of selected W-category and MHC class I and class II molecules using JTT (Fig. S17A) or p-distance (Fig. S17B) of Neighbor Joining; analyses of the additional W-category and MHC class I and class II molecules including nonclassical MHC class I and class II molecules using Maximum Likelihood (Fig. S18).

**Structural comparisons.** Comparative structural molecular analyses were conducted using Cn3D (58) and UCSF Chimera package (50). Figures 4 and S5-S7 were prepared with Cn3D.

**Recombinant protein studies.** *Cell lines:* CHO (Chinese hamster ovary)-K1 cells were obtained from RIKEN BRC (BioResource Research Center) through the National Bio-Resource Project of the MEXT (the Ministry of Education, Culture, Sports, Science and Technology) of Japan, and grown in Ham's F-12 medium (Wako) containing 10% fetal bovine serum (FBS) in 5% CO<sub>2</sub> at 37°C.

*Vector construction and transfection:* Signal peptides encoded by *WA* and *WB* genes were predicted using the SignalP 4.1 Server (46). DNA encoding a mature protein of tiger salamander (TS) *WA*\_01 (residues 21-250) was cloned into the pFLAG-CMV-3 Expression Vector (Sigma). DNA encoding a mature protein of TS *WB*\_01 (residues 20-273) or Mexican tetra (MT) *WB*\_01 (residues 23-272) was cloned into the pCAG-Hyg PA tag-N Vector (Wako). The pFLAG-CMV-3 Expression Vector and pCAG-Hyg PA tag-N Vector without insert sequences were used as negative controls (designated pFLAG and pPA, respectively). The following combinations were used for co-transfection experiments: N-terminal FLAG tagged *WA* (TS FLAG-*WA*) and N-terminal PA tagged *WB* (TS PA-*WB* or MT PA-*WB*); TS FLAG-*WA* and pPA; pFLAG and TS PA-*WB* or MT PA-*WB*; and pFLAG and pPA vectors. CHO-K1 cells were transfected using Lipofectamine 2000 (Invitrogen) according to the manufacturer's instruction. After 24 h, cells were harvested for flow cytometry and protein extraction.

*Protein extraction:* The co-transfected cells, a portion of which were analyzed for flow cytometry described below, were lysed using ice-cold lysis buffer containing 50 mM Tris-HCl (pH 7.5), 150 mM NaCl, 5 mM EDTA, 1% NP-40, 10 mM iodoacetamide. After placement on ice for 30 min, mixture was centrifugated at 20,000 x *g* for 20 min at 4°C. The supernatants were used as cell lysates for Western blotting to investigate the expression of recombinant proteins.

*Endoglycosydase H and Glycopeptidase F treatments:* Lysates from co-transfected cells were prepared as described above. Based on the manufacturer's instructions, the cell lysates prepared under protein denaturing conditions were treated with Endoglycosydase H (Endo H, NEB) or Glycopeptidase F (GPF, Takara Bio).

*Western blotting:* Equal amounts of total proteins of cell lysates were separated using SDS-PAGE (12% Tris-glycine gel), and transferred to polyvinylidene difluoride membranes. The membranes were incubated with 5% skim milk in PBST (0.05% Tween 20 in PBS) for 1 h. The PBST-washed membranes were incubated with mouse anti DYKDDDDK tag monoclonal antibody or rat anti PA tag monoclonal antibody for 1 h, washed with PBST and then incubated with anti-mouse IgG, HRP-linked whole Ab sheep (GE Healthcare) or goat anti-rat IgG(H+L)-HRP conjugate (SouthernBiotech) for 1 h. The HRP-conjugated antibodies were visualized using Pierce ECL Plus Western Blotting Substrate (Thermo Scientific) on ImageQuant LAS 4000mini (GE Healthcare). The MagicMark XP Western Protein Standard (Invitrogen) was used as protein size marker. After HRP-inactivation with 15% H<sub>2</sub>O<sub>2</sub> for 1 h, the membranes were incubated with mouse anti  $\beta$ -actin monoclonal antibody (MBL) for 1 h prior to incubation with anti-mouse IgG, HRP-linked whole Ab sheep (GE Healthcare) for 1 h. Visualization of  $\beta$ -actin was performed as described above.

*Flow cytometry:* Cells were incubated with primary antibody in FCM buffer (2% FBS and 0.1% sodium azide in PBS) for 1 h on ice. Then cells were washed with FCM buffer and incubated with secondary antibody in FCM buffer for 1 h on ice. The washed cells were suspended in PBS containing propidium iodide for staining of dead cells which were excluded from the analyses. The cells were analyzed using Gallios (Beckman Coulter) with Kaluza v1.3 software (Beckman Coulter). The FLAG tag was detected with mouse anti DYKDDDDK tag monoclonal antibody (Wako) and mouse IgG<sub>2b</sub> (SouthernBiotech) was used as isotype control. The PA tag was detected with rat anti PA tag monoclonal antibody (Wako) and rat IgG<sub>2a</sub> (SouthernBiotech) was used as isotype control. The mouse and rat IgG were detected using secondary antibodies Goat F(ab')<sub>2</sub> Anti-Mouse IgG(H+L) PE-conjugated (Beckman Coulter) and Goat F(ab')<sub>2</sub> Anti-Rat IgG(H+L) FITC-conjugated (SouthernBiotech), respectively.

**Analysis of the conservation profile of a W-category subgroup.** The amino acid sequences of the membrane-distal domains of the teleost fish W-category molecules (Figs. S1 and S2) were compared and, to understand the conservation profile, Wu-Kabat variability values were calculated as described (59; Table S4). Wu-Kabat variability (V) is defined as the number of different amino acids at a given position (Nd) divided by the frequency of the most common amino acid at that position (Nc/N; Nc, the number of the most common amino acid at that position; N, the number of sequences studied at that position) (59).

## Appendix

### 1. Overview of W-category genes

#### 1-1 Various animal groups possess W-category genes

W-category genes were identified in various jawed vertebrates. Table S1 shows the current identification of W-category genes. The animal groups shown to possess W-category genes include cartilaginous fish (sharks and skates), ray-finned fish (the teleost fish group), lobe-finned fish (coelacanth and lungfish) and tetrapods (salamanders). Thus, the ancestral W-category genes should have existed in the common ancestor of cartilaginous fish and ray-finned fish/lobe-finned fish/tetrapods, estimated to have diverged from each other around 457 million years ago (MYA) (posterior mean and 95 % credible interval of 443-464 MYA according to ref. 60). Therefore, W-category genes should be very ancient members of the MHC gene family.

Although W-category genes can be found in various animal groups, their distribution appears to be somewhat restricted within each group. Some examples are as follows. Cartilaginous fish (class Chondrichthyes) include two Subclasses, Holocephali (e.g., elephant shark) and Elasmobranchii (modern sharks and rays), estimated to have diverged around 421 MYA (410-447 MYA) (60). So far, W-category genes have been identified in Elasmobranchii. Among ray-finned fish, W-category genes have thus far been identified in the teleost fish group which include, for example, herring and zebrafish. The ancestors of ray-finned fish and lobe-finned fish/tetrapods are estimated to have diverged from each other around 419 MYA (416-422 MYA) (60). In lobe-finned fish, W-category genes have been identified in coelacanth and lungfish. The ancestors of lungfish and tetrapods are estimated to have diverged from each other around 392 MYA (375-408 MYA) (60). Among tetrapods, W-category genes have thus far been identified in salamanders. Restricted identification within a certain group may be related to genuine differences in gene inactivation but in some cases possibly also to incompleteness of sequence information or to sequence diversification beyond recognition.

#### 1-2 Nomenclature of W-category genes

##### 1-2-1 General description

Like conventional MHC class II molecules, a W-category molecule is expected to be composed of an  $\alpha$  chain and a  $\beta$  chain. In the present study, we name W-category  $\alpha$  chain WA, and W-category  $\beta$  chain WB. The assignments of the sequences as an  $\alpha$  chain-type or as a  $\beta$  chain-type are supported by their possession of amino acid residues specific for the respective chain and also by phylogenetic analyses (Fig. 2A and B; Datasets S1-S3; Fig. 7; Figs. S16-S18).

Except for W-category genes of cartilaginous fishes, some teleost fishes (described below) and lobe-finned fishes, simple “WA” and “WB” names for W-category genes are used, because information regarding the relationship among W-category genes is still limited and information about the gene locations is also limited. Numbers were added to the gene names like WA\_01 to specify each sequence even when only a single member for the relevant gene has been found. In case of cartilaginous fish, multiple loci were found in some cases and locus identifications remain to be studied. In those cases, additional symbols like “n1”, “n2” and so on, were temporarily used to discriminate related sequences of which at least some are expected to be from different loci.

##### 1-2-2 Nomenclature of cartilaginous fish W-category genes

In cartilaginous fish, currently six W-category genes have been identified; three WA genes and three WB genes. WA\_DS5, WA\_DS10, WB\_DS1 and WB\_DS3 were found in banded houndshark, and WA\_Nds3L and WB\_Nds5L were recently found in various other sharks. The somewhat complicated nomenclature for these shark W-category genes has historical reasons as explained below.

##### *About banded houndshark WA\_DS5, WA\_DS10, WB\_DS1 and WB\_DS3*

All WA and WB genes of banded houndshark were found to be linked in the genome (Fig. S9), but relative positions of individual genes of this shark species remain unknown. In the early phase of the present study (including the part described in ref. 23), fragments of MHC-like genes were found from the banded

houndshark genomic DNA or cDNA, and were named sequentially as *DS1*, *DS2*, *DS3* and so on. After some of them were recognized to belong to W-category genes and could be classified into *WA* or *WB*, they were renamed and their original tentative names were incorporated into the new names as *WB\_DS1*, *WB\_DS3*, *WA\_DS5* and *WA\_DS10*. That is the reason why these genes have a somewhat peculiar numerical nomenclature.

Probable numbers of gene loci of banded houndshark W-category genes are as follows (indicated in parentheses): *WA\_DS5* (three), *WA\_DS10* (one), *WB\_DS1* (two) and *WB\_DS3* (one). While simple names can be used for *WA\_DS10* and *WB\_DS3*, a more refined nomenclature is necessary for *WA\_DS5* and *WB\_DS1* as described below.

A banded houndshark presumably possesses three loci for *WA\_DS5* based on isolated cDNAs and Southern blot analyses (Figs. S1A, S3, S9A). Four kinds of cDNA sequences for *WA\_DS5* from a single individual banded houndshark N1 were identified. These four sequences were named as *WA\_DS5\_n1\_01*, *WA\_DS5\_n2\_01*, *WA\_DS5\_n3\_01* and *WA\_DS5\_n4\_01* (Fig. S1A). At present, relationships among these *WA\_DS5* sequences are only partially clarified.

For *WB\_DS1*, there presumably exist two loci in a banded houndshark based on the genomic sequencing and Southern blot analyses (Figs. S2A, S3, S9C and *SI Appendix*). However, complete expressed sequences could be identified from only one of these loci. This gene locus was named *WB\_DS1\_n1* and the other one was named *WB\_DS1\_n2*. A cDNA sequence of *WB\_DS1\_n2* could only be identified in an unusual cDNA form in which parts of *WA\_DS10* and *WB\_DS1\_n2* are combined together (LC218721, Table S3).

#### *About W-category genes of other cartilaginous fishes*

Similar to banded houndshark, other cartilaginous fishes also possess *WA\_DS5-like*, *WA\_DS10-like*, *WB\_DS1-like* and *WB\_DS3-like* sequences. Names with “-like” are used for those sequences with respective homology in the present study. In some cases, “L” instead of “-like” is used to save space.

The recent whole genome shotgun sequencing of great white shark revealed two additional W-category genes, namely, *WA\_Nds3L* and *WB\_Nds5L* and showed that three *WA* genes and three *WB* genes are located closely to each other forming three pairs of *WA/WB* genes (Fig. S11A). These pairs are: *WA\_Nds3L/WB\_DS3L*, *WA\_DS10L/WB\_DS1L* and *WA\_DS5L/WB\_Nds5L*. In the names of *WA\_Nds3L* and *WB\_Nds5L*, “N” represents “next to”, and “L” represents “-like”. The genes homologous to *WA\_Nds3L* or *WB\_Nds5L* could be identified in other cartilaginous fish species as shown in Table S1.

#### 1-2-3 Nomenclature of teleost fish W-category genes

In many teleost fishes (61) possessing W-category genes, only a single pair of intact *WA* and *WB* genes appears to exist. Exceptions are members of a group of Cyprinidae, including common carp and Chinese cavefish, which have two pairs of *WA/WB* genes in the genome (Fig. S11) and which are believed to have experienced a relatively recent additional whole genome duplication approximately 8.2 MYA (62). Therefore, the names *WA\_A1* and *WB\_B1* are used for one pair and *WA\_A2* and *WB\_B2* for the other. For the zebrafish W-category genes identified in the NCBI genomic sequence database, we use the names *WA\_13A* and *WB\_13B* referring to their location on zebrafish chromosome 13. This allows distinction from the zebrafish W-category sequences that were amplified from cDNA and were named zebrafish *WA\_01* to *05* and zebrafish *WB\_01* to *05* (Fig. S19).

#### 1-2-4 Nomenclature of lobe-finned fish W-category genes

As two distinct groups of *WA* genes were identified in lungfish based on similarity in the Ig-like domains, temporarily *WA\_1* and *WA\_2* were used for those genes. For *WB* genes, two kinds of *WB* genes were also identified in lungfish, and the names *WB\_1* and *WB\_2* were used for those genes. The *WB\_2* genes could be further classified into two groups, and the names *WB\_2\_1* and *WB\_2\_2* were used for those genes. Numerical supplements were used to specify the sequences.

#### 1-2-5 Nomenclature of salamander W-category genes



For the W-category genes of salamanders, simply *WA* and *WB* names were used, and numerical supplements were added like *WA\_01* and *WB\_01* to specify the sequences.

## 2. Identification of W-category genes

Various W-category genes were identified through our own experiments and also through database searches using various datasets. Below, accession numbers for sequences are provided where relevant. Accession numbers refer to those jointly used by GenBank at NCBI, DNA DataBank of Japan (DDBJ) and European Nucleotide Archive (ENA) unless mentioned otherwise.

### 2-1 Cartilaginous fish - modern sharks and skates

Extant Elasmobranchii (Neoselachii) contain two subgroups, Selachii (modern sharks) and Batoidea (rays, skates and sawfish). The divergence time of these two groups is estimated to be around 281 MYA (251-318 MYA) (60).

Three pairs of *WA/WB* genes were found in sharks. Two *WA* genes (*WA\_DS5* and *WA\_DS10*) and two *WB* genes (*WB\_DS1* and *WB\_DS3*) were isolated from banded houndshark. DNA fragments of *WA\_DS5*, *WB\_DS1* and *WB\_DS3* were originally amplified together in a single PCR reaction, and *WA\_DS10* was later discovered in a different way as described below. The homologs of these genes in other cartilaginous fishes were identified through searches of cartilaginous fish sequence databases.

*WA\_Nds3L* and *WB\_Nds5L* genes were identified in the whole genome shotgun sequence data of great white shark and then also found in other sequence data of cartilaginous fish.

Below, the identification of W-category genes of cartilaginous fish are described per species.

#### 2-1-1 Banded houndshark (*Triakis scyllium*)

Two *WA* genes (*WA\_DS5* and *WA\_DS10*) and two *WB* genes (*WB\_DS1* and *WB\_DS3*) were initially discovered experimentally in banded houndshark. Banded houndshark may have genes similar to *WA\_Nds3L* and *WB\_Nds5L*, but those have not been identified yet.

##### 2-1-1-1 Banded houndshark *WA\_DS5*

A short DNA fragment in the banded houndshark *WA\_DS5* Ig-like domain exon was found among the mixture of products (*BanI/PstI* restriction enzyme-resistant fractions) of the same PCR reaction products from which banded houndshark *WB\_DS1* (previously called DI) was found (23). Using this DNA fragment as a probe, the genomic library of banded houndshark was screened and positive clones were isolated, and then the genomic sequence of the Ig-like domain exon of banded houndshark *WA\_DS5* was determined. As positive clones could not be obtained in the screening of a banded houndshark cDNA library, the “rapid amplification of cDNA ends (RACE)” method was conducted using *WA\_DS5*-specific primers, and then 5'- and 3'-untranslated region (UTR) sequences were obtained. Using 5'- and 3'-UTR primers, four different cDNA sequences (*WA\_DS5\_n1\_01*, *n2\_01*, *n3\_01*, and *n4\_01*) could be amplified from a single individual of the banded houndshark N1 (similarities of these four sequences is described in section 5). The genomic exon/intron organization of banded houndshark *WA\_DS5\_n3* was determined as described in the Materials and Methods and shown in Figs. 5 and S8.

##### 2-1-1-2 Banded houndshark *WA\_DS10*

As stated above, *WA\_DS10* was discovered separately from the other banded houndshark W-category genes, and here some details on its discovery are described.

The banded houndshark *WA\_DS10* was found in one cDNA sequence (named F02\_14, LC218721, Table S3) among the products of the 5'-RACE reactions for *WB\_DS1* gene. This cDNA looked like a read-through fusion product and contained an - until then - unknown Ig-like domain exon which was combined with the Ig-like domain exon of *WB\_DS1\_n2* (a possible pseudogene, see the section of *WB\_DS1*) with an apparently normal splicing junction. Then RACE reactions were conducted using primers specific to this novel Ig-like domain exon sequence. After 5'- and 3'-regions of the cDNA were obtained, the complete coding sequence was obtained. It turned out that this new gene had a domain structure of MHC class II and could be classified as a W-category  $\alpha$  chain gene. This gene was named the banded houndshark *WA\_DS10*. Two kinds of *WA\_DS10* cDNA sequences were identified from the single individual banded houndshark N1 (Table S3). At

amino acid position 40 in Fig. 3, one (*WA\_DS10\_01*) has an “AAC” codon for an asparagine, the other (*WA\_DS10\_02*) has “AAT”. Otherwise they possess the same open reading frame sequences. The genomic exon/intron organization of banded houndshark *WA\_DS10* was determined as described in the Materials and Methods and shown in Fig. S8.

#### 2-1-1-3 Banded houndshark *WB\_DS1*

In 1992 we published the DNA sequence of the exon encoding the Ig-like domain of, now named, *WB\_DS1* (M85291) (23). However, at the time, we had not yet a concept of W-category genes. Later, one incomplete cDNA sequence of *WB\_DS1\_n1* was isolated by us from a kidney cDNA library of banded houndshark individual N2 and was registered (AY227971). In the present study, two loci for banded houndshark *WB\_DS1*, namely, *WB\_DS1\_n1* and *WB\_DS1\_n2* were identified. From *WB\_DS1\_n1* locus, the complete coding regions of two highly similar presumed allelic sequences, *WB\_DS1\_n1\_01* and *WB\_DS1\_n1\_02* were obtained (Fig. S2) using RT-PCR method based on information obtained from RACE studies. Shorter cDNA forms of both sequences lacking the penultimate CP/TM/CY exon were identified in our experiments and these presumably are alternatively spliced sequences. On the other hand, the  $\beta 2$  domain exon of *WB\_DS1\_n2* was only found as part of an unusual cDNA (described above in the section for *WA\_DS10*) and other *WB\_DS1\_n2* exons were not detected. The  $\beta 2$  domain exons were compared between *WB\_DS1\_n1* and *WB\_DS1\_n2* genes and high similarity between these genes was found in the  $\beta 2$  domain exons and surrounding regions. In the  $\beta 2$  domain exons, there are only three nucleotide differences between *WB\_DS1\_n1* and *WB\_DS1\_n2* (e.g. M85291 vs. LC200979, Table S3) and thus the probe consisting of the central portion of the  $\beta 2$  domain exon should be able to detect both genes (Figs. S3, S9 and S10). The genomic region of *WB\_DS1\_n1* containing a partial  $\beta 2$  domain exon and CP/TM/CY exons was determined using PCR method and the genomic DNA of banded houndshark individual N1 (LC009542). The upstream region of *WB\_DS1\_n1*  $\beta 2$  domain exon was partially investigated using genomic phage library clones of banded houndshark individual N0 (LC200978). These two genomic sequences were preliminarily combined in Fig. S8. Identification of genomic regions containing the leader and  $\beta 1$  domain exons of *WB\_DS1\_n1* gene of banded houndshark has not been successful thus far and remains to be investigated.

#### 2-1-1-4 Banded houndshark *WB\_DS3*

A short DNA fragment within the banded houndshark *WB\_DS3* Ig-like domain was found among the mixture of products (*BanI/PstI* restriction enzyme-resistant fractions) of the same PCR reaction products from which banded houndshark *WB\_DS1* (previously called DI) was found (23), just like the case of banded houndshark *WA\_DS5*. Using this DNA fragment as a probe, the genomic library of banded houndshark was screened and positive phage clones were isolated, and then the genomic sequence of banded houndshark *WB\_DS3* was determined as described in the Materials and Methods. *WB\_DS3* cDNA clones could be isolated from the kidney cDNA library of banded houndshark individual N2, and the sequence of one cDNA clone (*WB\_DS3\_01*) was determined. A complete coding sequence of banded houndshark *WB\_DS3* was amplified with two UTR primers and only a single *WB\_DS3* sequence (*WB\_DS3\_02*) was obtained in banded houndshark individual N1. There are only two amino acid differences between the two obtained *WB\_DS3* sequences (Fig. S2). Based on these cDNA sequences, exons in the genomic sequence of *WB\_DS3* could be assigned. The genomic exon/intron organization is presented in Fig. 5 and Fig. S8.

#### 2-1-2 Blue shark (*Prionace glauca*)

##### 2-1-2-1 Blue shark *WA\_DS5-like*

Blue shark *WA\_DS5-like* partial sequences were found through tblastn searches with banded houndshark *WA\_DS5\_n1\_01* sequence using SRX1823831 (white muscle tissue) of *Prionace glauca* SRA (Sequence Read Archive, NCBI). Representative sequences are as follows: SRR3632063.60991435.2, SRR3632063.65504350.1, and SRR3632063.57575183.1. Blue shark *WA\_DS5-like* partial sequences were also found using SRX3298485 (male immature kidney) of *Prionace glauca* SRA. Representative sequences are as follows: SRR6188468.25604256.2, SRR6188468.25604256.1, and SRR6188468.12728785.1.

#### 2-1-2-2 Blue shark *WA\_DS10-like*

Blue shark *WA\_DS10-like* sequence was found in GFYY01081745.1 (corresponding to the amino acid residues 15-143 of banded houndshark *WA\_DS10\_01*) and GFYY01081744.1 (139-243) through tblastn searches with banded houndshark *WA\_DS10\_01* sequence using transcriptome shotgun assembly (TSA) databases of cartilaginous fishes. For Fig. S1, a hypothetical combined sequence was used, which is composed of GFYY01081745.1 for the partial  $\alpha 1$  domain and GFYY01081744.1 for the  $\alpha 2$  domain and CP/TM/CY region as blue shark *WA\_DS10\_like* sequence.

#### 2-1-2-3 Blue shark *WA\_Nds3L*

Blue shark *WA\_Nds3L* sequence was found in GFYY01021401.1 through tblastn searches with great white shark *WA\_Nds3L* sequence using TSA databases of cartilaginous fishes.

#### 2-1-2-4 Blue shark *WB\_DS1-like*

Blue shark *WB\_DS1-like* sequence was found in GFYY01012278.1 (corresponding to the amino acid residues 1-282 of banded houndshark *WB\_DS1\_01*) through tblastn searches with banded houndshark *WB\_DS1\_01* sequence using TSA databases of cartilaginous fishes.

#### 2-1-2-5 Blue shark *WB\_DS3-like*

Blue shark *WB\_DS3-like* sequence was found in GFYY01033062.1 (corresponding to the amino acid residues 1-137 of banded houndshark *WB\_DS3\_01*) through tblastn searches with banded houndshark *WB\_DS3\_01* sequence using TSA databases of cartilaginous fishes.

#### 2-1-2-6 Blue shark *WB\_Nds5L*

Blue shark *WB\_Nds5L* sequence was found in GFYY01040305.1 (corresponding to the amino acid residues 12-83 of great white shark *WB\_Nds5L*) through tblastn searches with great white shark *WB\_Nds5L* sequence using TSA databases of cartilaginous fishes.

#### 2-1-3 Cloudy catshark (*Scyliorhinus torazame*)

Two pairs of W-category genes, *WA\_DS5-like/WB\_Nds5L* and *WA\_DS10-like/WB\_DS1-like*, were found in a 159 K contig, and *WA\_DS5-like/WB\_Nds5L* pair was found in a 82 K contig, as described below.

##### 2-1-3-1 Cloudy catshark *WA\_DS5-like*

Cloudy catshark *WA\_DS5-like* sequence was found in BFAA01007584.1 (159 K contig, 159043 bp) through tblastn searches with banded houndshark *WA\_DS5\_n1\_01* sequence using whole genome shotgun (wgs) databases of cartilaginous fishes which include Cloudy catshark WGS Project BFAA01. In this 159 K contig, *WA\_DS5-like* and *WB\_Nds5L* genes exist as a pair (head to head configuration with respect to the transcriptional orientations; 4185 bp between the two methionine-coding start codons) as shown in Fig. S11B. Cloudy catshark *WA\_DS5-like* sequence was also found in BFAA01011934.1 (82 K contig, 82266 bp) through tblastn searches with banded houndshark *WA\_DS5\_n1\_01* sequence using wgs databases of cartilaginous fishes. In this 82 K contig, *WA\_DS5-like* and *WB\_Nds5L* genes exist as a pair (head to head configuration with respect to the transcriptional orientations; 3059 bp between the two methionine-coding start codons) as shown in Fig. S11B.

Amino acid identity % between two *WA\_DS5-like* sequences from two different contigs of cloudy catshark are as follows:

Between cloudy catshark *WA\_DS5-like\_82K* vs. cloudy catshark *WA\_DS5-like\_159K*, 36 % for  $\alpha 1$  domain and 64 % for  $\alpha 2$  domain.

Amino acid identity % between *WA\_DS5-like* sequences of cloudy catshark and great white shark are as follows:

Between cloudy catshark WA\_DS5-like\_82K vs. great white shark WA\_DS5-like, 63 % for  $\alpha 1$  and 79 % for  $\alpha 2$ .

Between cloudy catshark WA\_DS5-like\_159K vs. great white shark WA\_DS5-like, 45 % for  $\alpha 1$  and 70 % for  $\alpha 2$ .

WA\_DS5-like sequence of cloudy catshark 82 K contig showed higher amino acid identity % with those of other sharks compared to WA\_DS5-like sequence of cloudy catshark 159 K contig. Similar relationships were observed in case of WB\_Nds5L of two cloudy catshark contigs.

#### 2-1-3-2 Cloudy catshark *WA\_DS10-like*

Cloudy catshark *WA\_DS10-like* sequence was found in BFAA01007584.1 (159 K, 159043 bp) through tblastn searches with banded houndshark WA\_DS10\_01 sequence using wgs databases of cartilaginous fishes. In this 159 K contig, *WA\_DS10-like* and *WB\_DS1-like* genes exist as a pair (head to head configuration with respect to the transcriptional orientations; 272 bp between the two methionine-coding start codons) as shown in Fig. S11B.

#### 2-1-3-3 Cloudy catshark *WB\_DS1-like*

Cloudy catshark *WB\_DS1-like* sequence was found in BFAA01007584.1 (159 K, 159043 bp) through tblastn searches with banded houndshark WA\_DS1\_01 sequence using wgs databases of cartilaginous fishes. *WA\_DS1-like* and *DS10-like* genes exist as a pair as described above.

#### 2-1-3-4 Cloudy catshark *WB\_Nds5L*

Cloudy catshark *WB\_Nds5L* sequence was found in BFAA01007584.1 (159 K, 159043 bp) through tblastn searches with banded houndshark WB\_DS1\_01 sequence using wgs databases of cartilaginous fishes. Cloudy catshark *WB\_Nds5L* sequence was also found in BFAA01011934.1 (82 K, 82266 bp; for  $\beta 2$  domain) through tblastn searches with banded houndshark WB\_DS3\_01 sequence using wgs databases of cartilaginous fishes. *WB\_Nds5L* and *WA\_DS5-like* genes exist as a pair in both contigs as described above.

Amino acid identity % between two WB\_Nds5L sequences from two different contigs of cloudy catshark are as follows:

Between cloudy catshark WB\_Nds5L\_82K vs. cloudy catshark WB\_Nds5L\_159K, 39 % for  $\beta 1$  domain and 84 % for  $\beta 2$  domain.

Amino acid identity % between WB\_Nds5L sequences of cloudy catshark and great white shark are as follows:

Between cloudy catshark WB\_Nds5L\_82K vs. great white shark WB\_Nds5L, 63 % for  $\beta 1$  and 73 % for  $\beta 2$ .

Between cloudy catshark WB\_Nds5L\_159K vs. great white shark WB\_Nds5L, 36 % for  $\beta 1$  and 66 % for  $\beta 2$ .

WB\_Nds5L sequence of cloudy catshark 82 K contig showed higher amino acid identity % with those of other sharks compared with WB\_Nds5L sequence of cloudy catshark 159 K contig. Similar relationships were observed in case of WA\_DS5-like of two cloudy catshark contigs as described above.

#### 2-1-4 Great white shark (*Carcharodon carcharias*)

In a 285 K contig of great white shark, three pairs of W-category genes were found: *WA\_Nds3L/WB\_DS3-like*, *WA\_DS10-like/WB\_DS1-like* and *WA\_DS5-like/WB\_Nds5L*.

#### 2-1-4-1 Great white shark *WA\_DS5-like*

Great white shark *WA\_DS5-like* sequence was found in QUOW01001706.1 (285 K, 285375 bp) through tblastn searches with banded houndshark WA\_DS5\_n1\_01 sequence using wgs databases of cartilaginous fishes. In this 285 K contig, *WA\_DS5-like* and *WB\_Nds5L* genes exist as a pair (head to head configuration with respect to the transcriptional orientations; 1790 bp between the two methionine-coding start codons) as shown in Fig. S11A.

#### 2-1-4-2 Great white shark *WA\_DS10-like*

Great white shark *WA\_DS10-like* sequence was found in QUOW01001706.1 (285 K, 285375 bp) through tblastn searches with banded houndshark *WA\_DS10\_01* sequence using wgs databases of cartilaginous fishes. In this 285 K contig, *WA\_DS10-like* and *WB\_DS1-like* genes exist as a pair (head to head configuration with respect to the transcriptional orientations; 275 bp between the two methionine-coding start codons) as shown in Fig. S11A.

#### 2-1-4-3 Great white shark *WA\_Nds3L*

Great white shark *WA\_Nds3L* sequence was found in QUOW01001706.1 (285 K, 285375 bp) through tblastn searches with banded houndshark *WA\_DS5\_n1\_01* sequence using wgs databases of cartilaginous fishes. In this 285 K contig, *WA\_Nds3L* and *WB\_DS3-like* genes exist as a pair (head to head configuration with respect to the transcriptional orientations; 1742 bp between the two methionine-coding start codons) as shown in Fig. S11A. *WA\_Nds3L* gene in this contig lacks a single nucleotide (G) near the middle of the  $\alpha 1$  domain exon, which produces a frame-shift, compared to the expressed sequences (e.g., SRA: SRR684727.41156647.1 of SRX228421). In Fig. S1 and Dataset S1, the corrected sequence for great white shark *WA\_Nds3L* is presented.

#### 2-1-4-4 Great white shark *WB\_DS1-like*

Great white shark *WB\_DS1-like* sequence was found in QUOW01001706.1 (285 K, 285375 bp) through tblastn searches with banded houndshark *WB\_DS1\_01* sequence using wgs databases of cartilaginous fishes. *WA\_DS1-like* and *DS10-like* genes exist as a pair as described above.

#### 2-1-4-5 Great white shark *WB\_DS3-like*

Great white shark *WB\_DS3-like* sequence was found in QUOW01001706.1 (285 K, 285375 bp) through tblastn searches with banded houndshark *WB\_DS3\_01* sequence using wgs databases of cartilaginous fishes. *WB\_DS3-like* and *WA\_Nds3L* genes exist as a pair as described above.

#### 2-1-4-6 Great white shark *WB\_Nds5L*

Great white shark *WB\_Nds5L* sequence was found in QUOW01001706.1 (285 K, 285375 bp) through tblastn searches with banded houndshark *WB\_DS3\_01* sequence using wgs databases of cartilaginous fishes. *WB\_Nds5L* and *WA\_DS5-like* genes exist as a pair as described above.

### 2-1-5 Whale shark (*Rhincodon typus*)

#### 2-1-5-1 Whale shark *WA\_DS5-like*

Whale shark *WA\_DS5-like* sequences were found in LVEK01588988.1 (for  $\alpha 1$  domain) and LVEK01625365.1 (for  $\alpha 2$  domain) through tblastn searches with banded houndshark *WA\_DS5\_n1\_01* sequence using wgs databases of cartilaginous fishes. In Fig. S1, as a whale shark *WA\_DS5-like* sequence, a hypothetical combination of sequences was used, which is composed of LVEK01588988.1 for the  $\alpha 1$  domain and LVEK01625365.1 for the  $\alpha 2$  domain.

#### 2-1-5-2 Whale shark *WA\_DS10-like*

Whale shark *WA\_DS10-like* sequences were found in LVEK01757095.1 (for  $\alpha 1$  domain) and LVEK01573532.1 (for  $\alpha 2$  domain) through tblastn searches with banded houndshark *WA\_DS10\_01* sequence using wgs databases of cartilaginous fishes. In Fig. S1, as a whale shark *WA\_DS10-like* sequence, a hypothetical combination of sequences was used, which is composed of LVEK01757095.1 for the  $\alpha 1$  domain and LVEK01573532.1 for the  $\alpha 2$  domain.

#### 2-1-5-3 Whale shark *WB\_DS1-like*

Whale shark *WB\_DS1-like* sequence was found in LVEK01262083.1 (for  $\beta 2$  domain) through tblastn searches with banded houndshark *WB\_DS1\_01* sequence using wgs databases of cartilaginous fishes.

#### 2-1-5-4 Whale shark *WB\_DS3-like*

Whale shark *WB\_DS3-like* sequence was found in LVEK01746520.1 (for  $\beta 1$  domain) through tblastn searches with banded houndshark *WB\_DS3\_01* sequence using wgs databases of cartilaginous fishes. This  $\beta 1$  domain possesses a cysteine residue highly characteristic for *WB\_DS3*.

#### 2-1-6 Whitespotted bambooshark (*Chiloscyllium plagiosum*)

##### 2-1-6-1 Whitespotted bambooshark *WA\_DS5-like*

Whitespotted bambooshark *WA\_DS5-like* sequences were found in QPFF01095956.1 (18K, 18685 bp; for  $\alpha 1$  and  $\alpha 2$  domains), QPFF01329347.1 (657 bp; for  $\alpha 2$  domain), and BEZZ01383420.1 (1297 bp; for  $\alpha 1$  domain), through tblastn searches with banded houndshark *WA\_DS5\_n1\_01* sequence using wgs databases of cartilaginous fishes.

##### 2-1-6-2 Whitespotted bambooshark *WA\_DS10-like*

Whitespotted bambooshark *WA\_DS10-like* sequence was found in QPFF01486458.1 (8K, 8625 bp; for  $\alpha 1$  and  $\alpha 2$  domains, and CP/TM/CY region), in QPFF01329347.1 (657 bp; for  $\alpha 2$  domain), and BEZZ01383420.1 (1297 bp; for  $\alpha 1$  domain), through tblastn searches with banded houndshark *WA\_DS5\_n1\_01* sequence using wgs databases of cartilaginous fishes.

##### 2-1-6-3 Whitespotted bambooshark *WA\_Nds3L*

Whitespotted bambooshark *WA\_Nds3L* sequence was found in QPFF01560724.1 (1417 bp; for  $\alpha 2$  domain) through tblastn searches with great white shark *WA\_Nds3L* sequence using wgs databases of cartilaginous fishes.

##### 2-1-6-4 Whitespotted bambooshark *WB\_DS1-like*

Whitespotted bambooshark *WB\_DS1-like* sequence was found in QPFF01495858.1 (705 bp; for  $\beta 2$  domain) through tblastn searches with banded houndshark *WB\_DS1\_01* sequence using wgs databases of cartilaginous fishes.

##### 2-1-6-5 Whitespotted bambooshark *WB\_DS3-like*

Whitespotted bambooshark *WB\_DS3-like* sequence was found in QPFF01327377.1 (543 bp; for  $\beta 1$  domain) and QPFF01162766.1 (4608 bp; for  $\beta 2$  domain) through tblastn searches with banded houndshark *WB\_DS3\_01* sequence using wgs databases of cartilaginous fishes.

##### 2-1-6-6 Whitespotted bambooshark *WB\_Nds5L*

Whitespotted bambooshark *WB\_Nds5L* sequences were found in QPFF01130085.1 (1921 bp; for  $\beta 1$  domain) and QPFF01212593.1 (1887 bp; for  $\beta 1$  domain) through tblastn searches with great white shark *WB\_Nds5L* sequence using wgs databases of cartilaginous fishes.

#### 2-1-7 Brownbanded bambooshark (*Chiloscyllium punctatum*)

##### 2-1-7-1 Brownbanded bambooshark *WA\_DS5-like*

Brownbanded bambooshark *WA\_DS5-like* sequences were found in BEZZ01010960.1 (3420 bp; for  $\alpha 1$  domain), BEZZ01017577.1 (3066 bp; for  $\alpha 1$  domain), and BEZZ01115237.1 (1187 bp; for  $\alpha 1$  domain), through tblastn searches with banded houndshark *WA\_DS5\_n1\_01* sequence using wgs databases of cartilaginous fishes.

##### 2-1-7-2 Brownbanded bambooshark *WA\_DS10-like*

Brownbanded bambooshark *WA\_DS10-like* sequence was found in BEZZ01254771.1 (544 bp; for  $\alpha 1$  domain), and in BEZZ01004761.1 (22649 bp; for  $\alpha 2$  domain and CP/TM/CY region) through tblastn searches with banded houndshark *WA\_DS10\_01* sequence using wgs databases of cartilaginous fishes. This 22 K contig also contains the exons for  $\beta 1$  and  $\beta 2$  domains of *WB\_DS3-like* gene.

##### 2-1-7-3 Brownbanded bambooshark *WA\_Nds3L*

Brownbanded bambooshark *WA\_Nds3L* sequence was found in BEZZ01099794.1 (1357 bp; for  $\alpha 2$  domain) through tblastn searches with great white shark *WA\_Nds3L* sequence using wgs databases of cartilaginous fishes.

#### 2-1-7-4 Brownbanded bambooshark *WB\_DS1-like*

Brownbanded bambooshark *WB\_DS1-like* sequence was found in BEZZ01084999.1 (1551 bp; for  $\beta 2$  domain) through tblastn searches with banded houndshark *WB\_DS1\_01* sequence using wgs databases of cartilaginous fishes.

#### 2-1-7-5 Brownbanded bambooshark *WB\_DS3-like*

Brownbanded bambooshark *WB\_DS3-like* sequence was found in BEZZ01004761.1 (22649 bp; for  $\beta 1$  and  $\beta 2$  domains) through tblastn searches with banded houndshark *WB\_DS3\_01* sequence using wgs databases of cartilaginous fishes. This 22 K contig also contains partial *WA\_DS10-like* sequence as described above.

#### 2-1-7-6 Brownbanded bambooshark *WB\_Nds5L*

Brownbanded bambooshark *WB\_Nds5L* sequences were found in BEZZ01198256.1 (690 bp; for  $\beta 1$  domain), BEZZ01164644.1 (829 bp; for  $\beta 1$  domain), BEZZ01050759.1 (2168 bp; for  $\beta 1$  domain), BEZZ01176133.1 (775 bp; for  $\beta 2$  domain) and BEZZ01162851.1 (838 bp; for  $\beta 2$  domain) through tblastn searches with great white shark *WB\_Nds5L* sequence using wgs databases of cartilaginous fishes.

#### 2-1-8 Zebra bullhead shark (*Heterodontus zebra*)

##### 2-1-8-1 Zebra bullhead shark *WA\_DS5-like*

Zebra bullhead shark *WA\_DS5-like* sequence was found in GGGL01449145 through tblastn searches with banded houndshark *WA\_DS5\_n1\_01* sequence using TSA databases of cartilaginous fishes. This TSA sequence is an apparent readthrough transcript and also contains *WA\_DS10-like* sequence (without a starting ATG codon for methionine, but with a stop codon), followed by a complete coding sequence for *WA\_DS5-like*.

The sequences with the following accession numbers also contain *WA\_DS5-like* sequence, and the numbers with asterisks (\*) contain *WA\_DS10-like* as well:

GGGL01449115\*, GGGL01449117, GGGL01449119\*, GGGL01449123, GGGL01449125,  
GGGL01449130\*, GGGL01449131\*, GGGL01449132\*, GGGL01449136\*, GGGL01449137,  
GGGL01449140, and GGGL01449146.

##### 2-1-8-2 Zebra bullhead shark *WA\_DS10-like*

Zebra bullhead shark *WA\_DS10-like* sequence was found in GGGL01449113 through tblastn searches with banded houndshark *WA\_DS10\_01* sequence using TSA databases of cartilaginous fishes. This TSA sequence as well as the sequences described below do not contain an ATG start codon for *WA\_DS10-like*.

The sequences with the following accession numbers also contain *WA\_DS10-like* sequence, and the sequences with the numbers with asterisks (\*) contain *WA\_DS5-like* sequences which were already described in the preceding section:

GGGL01449114, GGGL01449115\*, GGGL01449119\*, GGGL01449130\*, GGGL01449131\*,  
GGGL01449132\*, GGGL01449133, GGGL01449135, GGGL01449136\*, and GGGL01449145\*.

##### 2-1-8-3 Zebra bullhead shark *WB\_DS1-like*

Zebra bullhead shark *WB\_DS1-like* sequence was found in GGGL01058883 through tblastn searches with banded houndshark *WB\_DS1\_01* sequence using TSA databases of cartilaginous fishes.

The sequences with the following accession numbers also contain *WA\_DS1-like* sequence:

GGGL01058879, GGGL01058880, GGGL01058881, GGGL01058882, GGGL01058886, and  
GGGL01058887.



#### 2-1-8-4 Zebra bullhead shark *WB\_Nds5L*

Zebra bullhead shark *WB\_Nds5L* sequences were found in GGGL01449143, GGGL01449112 and GGGL01449138 as three representatives through tblastn searches with great white shark *WB\_Nds5L* sequence using TSA databases of cartilaginous fishes.

#### 2-1-9 Spiny dogfish (*Squalus acanthias*)

##### 2-1-9-1 Spiny dogfish *WA\_DS5-like*

Spiny dogfish *WA\_DS5-like* sequence was found in HAGW01089906 through tblastn searches with banded houndshark *WA\_DS5\_n1\_01* sequence using TSA databases of cartilaginous fishes. This TSA sequence is an apparent readthrough transcript and also contains *WB\_DS1-like* sequence, followed by *WA\_DS5-like* sequence without a proper sequence for a leader region. In Fig. S1, the predicted amino acid sequence based on HAGW01089906 is shown.

The sequences with the following accession numbers also contain *WA\_DS5-like* sequence, and the sequences with the numbers with asterisks (\*) contain *WB\_DS1-like* sequences as well: HAGW01089902\*, HAGW01089904\*, HAGW01089907\*, HAGW01089908\*, HAGW01089910\*, HAGT01020445, HAGT01100681, and HAGV01095271.

The predicted amino acid sequence of HAGT01020445 is similar to banded houndshark *WA\_DS5\_n1\_01* sequence, and those of the other sequences are similar to banded houndshark *WA\_DS5\_n1\_04* sequence.

##### 2-1-9-2 Spiny dogfish *WA\_DS10-like*

Spiny dogfish *WA\_DS10-like* sequence was found in HAGT01122485 (partial  $\alpha 1$ ,  $\alpha 2$  and partial TM) through tblastn searches with banded houndshark *WA\_DS10\_01* sequence using TSA databases of cartilaginous fishes.

##### 2-1-9-3 Spiny dogfish *WA\_Nds3L*

Spiny dogfish *WA\_Nds3L* sequence was found in HAGT01004242 (311bp;  $\alpha 2$  domain) through tblastn searches with great white shark *WA\_Nds3L* sequence using TSA databases of cartilaginous fishes.

##### 2-1-9-4 Spiny dogfish *WB\_DS1-like*

Several EST sequences of spiny dogfish were found through tblastn searches with banded houndshark *WB\_DS1\_01* using “expressed sequence tags (est)” databases; these sequences included spiny dogfish *WB\_DS1-like1* and *WB\_DS1-like2* from pooled multiple tissues of spiny dogfish, and their accession numbers are listed in Table S3. All these sequences lack the 3' portion of the gene. The longer one (spiny dogfish *WB\_DS1-like1*) contains a partial CP/TM/CY region.

Spiny dogfish *WB\_DS1-like* sequence (*WB\_DS1-like3*) was also found in HAGW01089902 through tblastn searches with banded houndshark *WB\_DS1\_01* sequence using TSA databases of cartilaginous fishes. This longest TSA sequence is an apparent readthrough transcript and also contains *WA\_DS5-like* sequence as described in the previous section. In Fig. S2, the predicted amino acid sequence based on HAGW01089902 is shown.

The sequences with the following accession numbers also contain *WB\_DS1-like* sequences followed by incomplete *WA\_DS5-like* sequences:

HAGW01089904, HAGW01089906, HAGW01089907, HAGW01089908, and HAGW01089910.

##### 2-1-9-5 Spiny dogfish *WB\_DS3-like*

Several EST sequences of spiny dogfish were found through tblastn searches with banded houndshark *WB\_DS3\_01* sequence using est databases; these sequences included spiny dogfish *WB\_DS3-like1*, *WB\_DS3-like2* and *WB\_DS3-like3* as representatives from pooled multiple tissues of spiny dogfish, and their accession numbers are listed in Table S3. All these sequences lack most of the 3' portion of the gene. The longest one (spiny dogfish *WB\_DS3-like1*) contains a partial  $\beta 2$  domain sequence as shown in Fig. S2.

##### 2-1-9-6 Spiny dogfish *WB\_Nds5L*

Spiny dogfish *WB\_Nds5L* sequence was found in HAGT01000336 (329 bp;  $\beta$ 1 domain) through tblastn searches with great white shark *WB\_Nds5L* sequence using TSA databases of cartilaginous fishes.

#### 2-1-10 Little skate (*Leucoraja erinacea*)

##### 2-1-10-1 Little skate *WA\_DS5-like*

Little skate *WA\_DS5-like* sequences were found in AESE012173146 (for the  $\alpha$ 1 domain) and AESE011681578 (for the  $\alpha$ 2 domain) through tblastn search with banded houndshark *WA\_DS5\_n1\_01* sequence using wgs databases of cartilaginous fishes. One cDNA sequence (Sequence ID: gnl|SRA|SRR088619.19134478.1) was found through tblastn searches with the translated sequence of AESE012173146 using “sequence read archive (SRA)” dataset SRX036536, and this cDNA sequence contains a short overlap region between the  $\alpha$ 1 and  $\alpha$ 2 domain-exons as described above. A tentative leader sequence was obtained through tblastn searches with AESE012173146 ( $\alpha$ 1 domain) using SRX036536 mentioned above. In Fig. S1, a hypothetical combination of sequences was used based on genomic sequence information of a tentative leader sequence, the  $\alpha$ 1 domain (AESE012173146) and the  $\alpha$ 2 domain (AESE011681578).

##### 2-1-10-2 Little skate *WA\_DS10-like*

Little skate *WA\_DS10-like* gene sequences corresponding to the  $\alpha$ 1 domain, the  $\alpha$ 2 domain and the CP/TM/CY region were found as follows.

Little skate *WA\_DS10-like* sequence was found in AESE011710435 (for the  $\alpha$ 2 domain) through tblastn searches with banded houndshark *WA\_DS10\_01* sequence using wgs databases of cartilaginous fishes. A partial  $\alpha$ 1 and  $\alpha$ 2 domain-corresponding cDNA sequence (LittleSkate\_TranscriptomeContig95319) was found through tblastn searches with banded houndshark *WA\_DS-10\_01* sequence using Little Skate Transcriptomic Contigs-Build 2 at the SkateBase (42) (<http://skatebase.org/skateBLAST>). A complete sequence for the  $\alpha$ 1 domain of little skate *WA\_DS10-like* gene was found in AESE011594527 (corresponding to LittleSkate\_Consensusfrom Contig1715029 at the SkateBase) through tblastn searches with the partial  $\alpha$ 1 domain sequence using wgs database of little skate. A candidate sequence for CP/TM/CY region was found in AESE012658604 (LittleSkate\_ConsensusfromContig2822493 at the SkateBase) through tblastn searches with LittleSkate\_TranscriptomeContig99288 which contains a partial sequence of  $\alpha$ 2 domain and CP/TM/CY region using Little Skate Transcriptomic Contigs-Build 2 at the SkateBase. In Fig. S1, a hypothetical combination of sequences was used, which is composed of three genomic regions, namely, the  $\alpha$ 1 domain (AESE011594527), the  $\alpha$ 2 domain (AESE011710435) and CP/TM/CY region (AESE012658604).

##### 2-1-10-3 Little skate *WB\_DS1-like*

Little skate *WB\_DS1-like* sequence was found in AESE011933439 (for the  $\beta$ 2 domain) through tblastn searches with banded houndshark *WB\_DS1\_n1\_01* sequence using wgs databases of cartilaginous fishes. A cDNA sequence corresponding to a partial  $\beta$ 1 and  $\beta$ 2 domain (LittleSkate\_TranscriptomeContig44319) was found through tblastn searches with banded houndshark *WB\_DS1\_n1\_01* sequence using Little Skate Transcriptomic Contigs-Build 2 at the SkateBase. In Fig. S2, a hypothetical combined sequence was used, which is composed of a cDNA sequence (LittleSkate\_TranscriptomeContig44319, for the partial  $\beta$ 1 domain) and a genomic sequence (AESE011933439, for the  $\beta$ 2 domain).

##### 2-1-10-4 Little skate *WB\_Nds5L*

Little skate *WB\_Nds5L* sequence was found in AESE011737676.1 (328 bp; for  $\beta$ 2 domain) through tblastn search with great white shark *WB\_Nds5L* sequence using wgs databases of cartilaginous fishes.

## **2-2 Ray-finned fish - teleost fish group**

### 2-2-1 Japanese grenadier anchovy (*Coilia nasus*)

Japanese grenadier anchovy *WA* and *WB* sequences were found in GFON01059655.1 (encoding  $\alpha$ 1 and partial  $\alpha$ 2 domain of *WA*) and GFON01085854.1 (encoding *WB*) through tblastn searches with Atlantic herring *WA\_01* and *WB\_01* sequences, respectively, using TSA databases of bony fishes.

### 2-2-2 Atlantic herring (*Clupea harengus*)

Atlantic herring *WA* and *WB* sequences were initially found in 34 K contig and further recently identified in an extended 344 K contig as described below.

Atlantic herring *WA* and *WB* sequences were found in JZKK01005006 (34 K contig, 34278 bp) and also in OOIJ01000439 (“344 K contig”, 344569 bp, Fig. S11C) through tblastn searches with zebrafish *WA\_13A* and *WB\_13B* sequences, respectively, using wgs databases of bony fishes. 344 K contig completely covers 34 K contig. *WA* and *WB* genes exist as a pair (head to head configuration with respect to the transcriptional orientations; 118 bp between the two methionine-coding start codons) as shown in Fig. S11C. Other than this *WA/WB* pair, an exon fragment of *WA*  $\alpha 2$  is also detected (Fig. S11C). Notable about Atlantic herring *WA* molecule is that the otherwise highly conserved canonical second cysteine of the  $\alpha 2$  domain is replaced with a phenylalanine. This replacement was also observed in the *WA*  $\alpha 2$  domain fragment and observed in SRA genomic sequences (e. g., gnl|SRA|SRR611608.17870700.1 of SRX203066). cDNA sequence information of Atlantic herring W-category genes is not available at present.

### 2-2-3 Sardine (*Sardina pilchardus*)

Sardine *WA* sequence was found in GGSC01089055, GGSC01089060, GGSC01089061 and GGSC01089054, GGSC01089059 (corresponding to *WA*  $\alpha 2$  domain) and GGSC01089058 (also corresponding to *WA*  $\alpha 2$  domain) through tblastn searches with Atlantic herring *WA\_01* sequence using TSA databases of bony fishes.

Sardine *WB* partial sequences were found through tblastn searches with Atlantic herring *WB\_01* sequence using SRX3593722 (liver RNA) of sardine SRA. Representative sequences are as follows: SRR6505116.71659865.1, SRR6505116.16871074.2, and SRR6505116.16871074.1.

### 2-2-4 Allis shad (*Alosa alosa*)

Allis shad *WA* and *WB* sequences were found in GETY01010370 (for *WA*), GETY01018251 (for *WB*) and GETY01036995 (for *WB*) through tblastn searches with zebrafish *WA\_13A* for *WA* and *WB\_13B* for *WB*, respectively, using TSA databases of bony fishes. Allis shad *WA* sequence possesses the canonical second cysteine in the  $\alpha 2$  domain, which is different from the case of Atlantic herring, although both allis shad and Atlantic herring belong to the family Clupeidae.

### 2-2-5 Alewife (*Alosa pseudoharengus*)

Alewife *WA* and *WB* sequences were found in GFCK01040569.1 (encoding partial  $\alpha 2$  and CP/TM/CY of *WA*) and GFCK01026404.1 (encoding *WB*) through tblastn searches with Atlantic herring *WA\_01* and *WB\_01* sequences, respectively, using TSA databases of bony fishes.

### 2-2-6 Hilsa shad (*Tenualosa ilisha*)

Hilsa shad *WA* and *WB* sequences were found in QYSC01123695 (“325 K contig”, 325703 bp, Fig. S11C) through tblastn searches with Atlantic herring *WA\_01* and *WB\_01* sequences using wgs databases of bony fishes. *WA* and *WB* genes exist as a pair (head to head configuration with respect to the transcriptional orientations; 11593 bp between the two methionine-coding start codons) as shown in Fig. S11C. Hilsa shad *WA* sequence also possesses the canonical second cysteine in the  $\alpha 2$  domain like allis shad *WA*, which is different from the case of Atlantic herring.

### 2-2-7 Oriental weatherfish (weather loach, mud loach) (*Misgurnus anguillicaudatus*)

Oriental weatherfish *WA* and *WB* sequences were found in GAAD01002023 (encoding a partial  $\alpha 1$  domain, a complete  $\alpha 2$  domain and a partial CP/TM/CY region of *WA*) and GAAD01004277 (encoding a partial  $\beta 2$  domain and a complete CP/TM/CY region of *WB*) through tblastn searches with zebrafish *WA\_13A* and *WB\_13B*, respectively, using TSA databases of bony fishes. Since GAAD01004277 lacks sequences corresponding to the amino-terminal portion (eleven amino acid residues) of the  $\beta 2$  domain, we assembled a presumed complete  $\beta 2$  domain coding sequence using SRA transcriptomic database information (e. g., SRA:SRR3064024.68986258.1 of SRX1479505) and used this sequence in the analyses.

### 2-2-8 Spined loach (*Cobitis taenia*)

Spined loach *WA* sequence was found in GGJF01002240 (encoding partial  $\alpha 1$ ,  $\alpha 2$  and CP/TM/CY of *WA*) through tblastn searches with zebrafish *WA\_13A* sequence using TSA databases of bony fishes. Spined loach *WB* sequence has not been obtained yet.

### 2-2-9 White sucker (*Catostomus commersonii*)

White sucker *WA* and *WB* sequences were found in GECX01063527 (for *WA*) and GECX01114064 (for *WB*) through tblastn searches with zebrafish *WA\_13A* and *WB\_13B* sequences, respectively, using TSA databases of bony fishes. The white sucker *WB* sequence of GECX01114064 lacks the beginning of the leader sequence and the last part of the CP/TM/CY portion.

### 2-2-10 Common carp (*Cyprinus carpio*)

For genomic sequence information of common carp, the NCBI database contains datasets of two whole genome sequencing projects, BioProject PRJEB7241 and BioProject PRJNA73579. The two projects sequenced the genome of common carp using different individuals and the two sources showed similar but not identical results. In the common carp genome, we could identify two *WA/WB* pairs, namely, *WA\_A1/WB\_B1* and *WA\_A2/WB\_B2*, in both datasets. Between common carp *WA\_A1* and *WA\_A2*, amino acid sequence identity is 93 % in the  $\alpha 2$  domain, and between common carp *WB\_B1* and *WB\_B2*, amino acid sequence identity is 81 % in the  $\beta 2$  domain. In addition, fragments of *WA* and *WB* genes were identified. In Figs. S11E and S11F, the genomic locations of these common carp W-category genes and the fragments are summarized.

Below, identifications of W-category sequences in common carp are described separately for the two different BioProject sources.

Within BioProject PRJEB7241 (62), common carp *WA* and/or *WB* sequences were found in LN590696 (“26 M contig” in Fig. S11E, LG32, 26100072 bp), LN598268 (“890 K contig”, 890226 bp, 26 M contig includes this 890 K contig region), LN594648 (“138 K contig” in Fig. S11E, 138244 bp) and LN590685 (“20 M contig” in Fig. S11F, LG16, 20606094 bp) through tblastn searches with zebrafish *WA\_13A* and *WB\_13B* sequences using the database of nucleotide collection. The 26 M contig and 890 K contig each contain a *WA\_A1/WB\_B1* gene pair (head to head configuration with respect to the transcriptional orientations; 294 bp between the two methionine-coding start codons), while the 138 K contig contains a *WA\_A2/WB\_B2* gene pair (head to head configuration with respect to the transcriptional orientations; 331 bp between the two methionine-coding start codons) (Fig. S11E). The 138 K contig additionally contains a *WB\_B2* CP/TM/CY fragment (Fig. S11E) and the 20 M contig contains a *WA\_A1*  $\alpha 2$  domain exon fragment (Fig. S11F). Compared with presumed intact genes, *WA\_A1* of the 26 M/890 K contigs lacks a single nucleotide in the  $\alpha 1$  domain exon, and *WB\_B1* of these contigs has an extra nucleotide in the leader exon. *WA\_A2* of the 138 K contig appears intact while *WB\_B2* of this contig has two extra nucleotides in the  $\beta 2$  domain exon. These deviations from presumed intact sequences may either represent actual gene inactivations or sequencing/assembly errors.

Within BioProject PRJNA73579 (63, 64), common carp *WA/WB* sequences were found in LHQP01015169 (“107 K contig”, 107664 bp) and LHQP01028415 (“82 K contig” in Fig. S11E, 82519 bp) through tblastn searches with zebrafish *WA\_13A* and *WB\_13B* sequences using wgs databases of bony fishes. The 107 K contig contains the *WA\_A1/WB\_B1* gene pair (head to head configuration with respect to the transcriptional orientations; 294 bp between the two methionine-coding start codons) while the 82 K contig contains the *WA\_A2/WB\_B2* gene pair (head to head configuration with respect to the transcriptional orientations; 333 bp between the two putative start codon positions). In the middle of the  $\alpha 2$  domain exon of *WA\_A1* of the 107 K contig, inversion and other changes of DNA sequences are observed, while *WB\_B1* of this contig appears intact. *WA\_A2* of the 82 K contig appears to be intact while *WB\_B2* of this contig has a single nucleotide change for the methionine-coding start codon. Again, these deviations from presumed intact sequences may either represent actual gene inactivations or sequencing/assembly errors.

In the present study, for comparisons with sequences of other species, apparently intact *WA\_A2* of the 82 K contig was used for the common carp *WA\_A2\_01*, and *WB\_B1* of the 107 K contig was used for the common

carp *WB\_B1\_01*. For the common carp *WA\_A1* and *WB\_B2*, putatively correct sequences were assembled as information about short genomic sequences of *WA\_A1* and *WB\_B2* genes are available from SRA of the common carp strain Songpu in BioProject PRJEB7241, which is the same strain as that used to make the draft genome in the same project (ref. 62) and, based on those SRA sequences, the portions of available W-category sequences of the common carp draft genome that were suggested defective appeared to be intact instead. The corrected version of *WA\_A1* of the 26 M/890 K contigs was made for the common carp *WA\_A1* after the confirmation with the genomic DNA sequences of the common carp strain Songpu (e. g., SRA:SRR924320.37964842.2 of SRX316954, Sp1). Similarly the corrected version of *WB\_B2* of the 138 K contig was made for the common carp *WB\_B2* after the confirmation with the genomic DNA sequences (e. g., SRA:SRR924320.1454377.1 of SRX316954, Sp1). There are four different SRA datasets from strain Songpu Sp1, Sp2, Sp3 and Sp4. SRA sequence information supported intactness of *WA\_A1* and *WB\_B2*.

#### 2-2-11 Chinese cavefish (*Sinocyclocheilus grahami* (Sg), *S. rhinoceros* (Sr), *S. anshuiensis* (Sa))

Chinese cavefish from which W-category genes were identified include three closely related species, *Sinocyclocheilus grahami* (Sg), *S. rhinoceros* (Sr) and *S. anshuiensis* (Sa). In our study, the same abbreviations of Sg, Sr and Sa are used as in a published report (65). In Chinese cavefish, we could identify two *WA/WB* gene pairs, namely, *WA\_A1/WB\_B1* and *WA\_A2/WB\_B2*, just like common carp; the assignments of 1 or 2 were in accordance with the names of the orthologous common carp genes (Fig. S20). Because both *WA\_A1* and *WA\_A2* were obtained only from *S. rhinoceros* (Sr), W-category sequences of *S. rhinoceros* (Sr) were used as the representative sequences of Chinese cavefish in the analyses.

Chinese cavefish *WA* and *WB* sequences were found to correspond to the following predicted sequences through tblastn searches with zebrafish *WA\_13A* and *WB\_13B* sequences using the database of nucleotide collection; XM\_016288790.1 (*WA\_A1* of Sg), XM\_016571073.1 (*WA\_A1* of Sr), XM\_016474588.1 (*WA\_A1* of Sa), XM\_016544921.1 (*WA\_A2* of Sr), XM\_016288788.1 (*WB\_B1* of Sg), XM\_016288789.1 (*WB\_B1* of Sg, partial), XM\_016571072.1 (*WB\_B1* of Sr), XM\_016474614.1 (*WB\_B1* of Sa), XM\_016263664.1 (*WB\_B2* of Sg), XM\_016544920.1 (*WB\_B2* of Sr), and XM\_016486958.1 (*WB\_B2* of Sa). Chinese cavefish *WA* and *WB* genomic sequences were also detected in the following contigs through tblastn searches with zebrafish *WA\_13A* and *WB\_13B* sequences using wgs databases of bony fishes: LCYQ01031371.1 (including a complete pair of *WA\_A1/WB\_B1* of Sg, 102 K contig, 102623 bp; head to head configuration with respect to the transcriptional orientations; 341 bp between the two opposing nearest methionine-coding start codons, as there are two possible *WB* leader exons), LCYQ01012883.1 (including a partial *WA\_A2* of Sg, 29 K contig, 29450 bp), LCYQ01125997.1 (including a partial *WA\_A2* and a complete *WB\_B2* of Sg, 2 K genomic sequence, 2712 bp), LAVF01191476.1 (including a complete pair of *WA\_A2/WB\_B2* of Sr, 50 K contig, 50091 bp; head to head configuration with respect to the transcriptional orientations; 329 bp between the two methionine-coding start codons), LAVF01079966.1 (including a partial *WA\_A1* and a complete *WB\_B1* of Sr, 64 K contig, 64734 bp), LAVF01079967.1 (including a partial *WA\_A1* of Sr, 37 K contig, 37291 bp), LAVE01180287.1 (including a partial *WA\_A1* of Sa, 36 K contig, 36160 bp), LAVE01000366.1 (including a partial *WA\_A2* and a complete *WB\_B2* of Sa, 31 K contig, 31461 bp) and LAVE01180285.1 (including a partial *WA\_A1* and a complete *WB\_B1* of Sa, 36 K contig, 36027 bp). Based on those shorter contigs, longer genomic scaffolds containing Chinese cavefish W-category genes are available as follows: NW\_015505413 (*WA\_A1/WB\_B1* of Sg, 2.6 M, 2662682 bp), NW\_015641068 (*WA\_A1/WB\_B1* of Sr, 124 K, 124120 bp), NW\_015557379 (*WA\_A1/WB\_B1* of Sa, 3.3 M, 3351518 bp), NW\_015666971 (*WA\_A2/WB\_B2* of Sr, 1.2 M, 1242612 bp), NW\_015536465 (pseudo [?] *WA\_A2/WB\_B2* of Sa, 413 K, 413061 bp). Basically, the region containing W-category genes and the surrounding genes of Chinese cavefish is similar to the relevant region of zebrafish chromosome 13 (Fig. S11E).

#### 2-2-12 Goldfish (*Carassius auratus*)

Goldfish *WA* and *WB* sequences were isolated based on the sequence information of zebrafish and/or common carp W-category genes. At first, to isolate goldfish W-category gene fragments, RT-PCR reaction was conducted using goldfish RNA and primers based on zebrafish and/or common carp W-category sequences. Then, 5' and 3' RACE reactions were conducted using goldfish *WA*- and *WB*-specific primers. After obtaining

goldfish partial sequences for *WA* and *WB*, complete coding regions of goldfish *WA* and *WB* genes were amplified (the primers are listed in Table S2) and the sequences were determined. Because the goldfish genome experienced the same additional whole genome duplication as the common carp genome did, a duplication of *WA/WB* pair in goldfish would be expected in comparison with the zebrafish genome (66). The isolated goldfish *WA* and *WB* sequences were compared with common carp *WA\_A1*, *WA\_A2*, *WB\_B1* and *WB\_B2* and, judging from sequence similarity levels, identified goldfish *WA* and *WB* sequences probably correspond to *WA\_A1* and *WB\_B1*, respectively (Fig. S20). The possible existence of additional *WA* and *WB* genes in goldfish remains to be studied.

#### 2-2-13 Catla (*Gibelion catla* or *Catla catla*)

Catla *WA* and *WB* sequences were found in GEAE01049160.1 (for *WA*) and GEAE01019557.1 (for *WB*) through tblastn searches with zebrafish *WA\_13A* and *WB\_13B* sequences, respectively, using TSA databases of bony fishes.

#### 2-2-14 Tench (*Tinca tinca*)

Tench *WA* and *WB* sequences were found in GFZX01071246.1 (for *WA*) and GFZX01039606.1 (for *WB*) through tblastn searches with zebrafish *WA\_13A* and *WB\_13B* sequences, respectively using TSA databases of bony fishes. The beginning of *WB* sequence is highly divergent compared to those of other closely related species and can be genomic, therefore, this part is not included in Fig. S2D.

#### 2-2-15 Grass carp (*Ctenopharyngodon idella*)

Grass carp *WA* and *WB* sequences were found in GEUQ01023638 (for *WA*), GBKA01001259 (for *WB*) and GEUQ01052457 (for *WB*) through tblastn searches with zebrafish *WA\_13A* and *WB\_13B* using TSA databases of bony fishes. This grass carp *WA* cDNA sequence contains intron 2 sequence (between the  $\alpha 1$  and  $\alpha 2$  domain-coding exons) while all the other introns were properly spliced out. The SRA transcriptome databases contain properly spliced sequences of this grass carp *WA* gene (e. g., SRX1634319). Therefore, a complete transcript for grass carp *WA* can be assumed. Accessions GBKA01001259 and GEUQ01052457 contain the same *WB*-coding sequence.

#### 2-2-16 Fathead minnow (*Pimephales promelas*)

Fathead minnow *WA* and *WB* sequences were found in JNCD01006382 (for *WA/WB* pair, “111 K contig” in Fig. S11E, 111553 bp; head to head configuration with respect to the transcriptional orientations; 173 bp between the two methionine-coding start codons; Fig. 5B) and JNCE01056294 (for *WA/WB* pair, “23 K contig”, 23124 bp) through tblastn searches with zebrafish *WA\_13A* and *WB\_13B* using wgs databases of bony fishes. The 111 K contig sequence includes the 23 K contig sequence fragment region.

#### 2-2-17 Roach minnow (*Rutilus rutilus*)

Roach minnow *WA* and *WB* sequences were found in GEBE01046214.1 (encoding leader,  $\alpha 1$  and partial  $\alpha 2$  of *WA*), GEBE01046216.1 (encoding partial  $\alpha 2$  and CP/TM/CY of *WA*), GEBE01052260.1 (encoding  $\beta 1$  and partial  $\beta 2$  domain of *WB*), and GEBE01052261.1 (encoding partial  $\beta 2$  and partial CP/TM of *WB*) through tblastn searches with zebrafish *WA\_13A* (for the first two) and *WB\_13B* (for the last two) sequences using TSA databases of bony fishes. The beginning of *WB* sequence is highly divergent compared to those of other closely related species and can be genomic, therefore, this part is not included in Fig. S2D.

#### 2-2-18 Amur ide (*Leuciscus waleckii*)

Amur ide *WA* and *WB* sequences were found in FLSR01004870 (for *WA/WB* pair, “28 M contig” in Fig. S11E, LG15, 28600511 bp; head to head configuration with respect to the transcriptional orientations; 164 bp between the two methionine-coding start codons) through tblastn searches with zebrafish *WA\_13A* and *WB\_13B* using wgs databases of bony fishes. Compared with presumed intact genes, *WA* of this contig lacks a single nucleotide in the  $\alpha 1$  domain exon, and *WB* of this contig lacks two nucleotides in the  $\beta 1$  domain exon. Presumably correct sequences were preliminarily constituted as information about short genomic sequences

of *WA* and *WB* genes are available from SRA of Amur ide in BioProject PRJEB12292, which also produced contig FLSR01004870 and, based on those sequences, the portions of available W-category sequences of Amur ide that were suggested defective appeared to be intact instead. The corrected *WA* of 28 M contigs for Amur ide *WA* was made after the confirmation with genomic SRA sequences of Amur ide (e.g., SRA:ERR1341435.99541468.2 of ERX1413017). Similarly the corrected *WB* of the same contig for Amur ide *WB* was made after the confirmation with genomic SRA sequences (e.g., SRA:ERR1341435.114433469.1 of ERX1413017). Basically, the region containing W-category genes and the surrounding genes of Amur ide is similar to the relevant region of zebrafish chromosome 13 (Fig. S11E).

#### 2-2-19 Zebrafish (*Danio rerio*)

Zebrafish *WA/WB* genes (Fig. S11E) were the first pair of W-category genes that we recognized outside cartilaginous fish. During extensive searches for MHC genes in various teleost fish, we noticed two puzzling MHC genes on chromosome 13 of the zebrafish genome that had not been discussed in article format yet. These turned out to share characteristic features with the banded houndshark W-category genes. The sequence of zebrafish *WA* gene is NM\_001098262 (for mRNA of zebrafish *WA\_13A*; gene, zmp:0000001138; GeneID:100002901) and that of zebrafish *WB* gene is NM\_001328089 (for mRNA of zebrafish *WB\_13B*; gene, zmp:0000001006; GeneID:100002840). The zebrafish *WA/WB* gene pair displays head to head configuration with respect to the transcriptional orientations with 227 bp between the two methionine-coding start codons. In this very short region between two start codons, the promoter sequence motifs highly conserved between the classical MHC class I and class II genes (67) were not identified.

RT-PCR reactions were conducted using zebrafish RNA isolated from the anterior half of a zebrafish and primers based on the zebrafish genomic *WA* and *WB* sequences (Table S2) to obtain cDNA sequences of zebrafish W-category genes. Polymorphism of zebrafish W-category genes were investigated using different individuals (see *SI Appendix* section 5 and Fig. S19).

#### 2-2-20 Brown ghost knifefish (*Apteronotus leptorhynchus*)

Brown ghost knifefish *WA* and *WB* sequences were found in GBKR010337083 (for *WA*) and GBKR010051454 (for *WB*) through tblastn searches with zebrafish *WA\_13A* and *WB\_13B* sequences, respectively, using TSA databases of bony fishes. There are twelve *WA*-containing sequences of brown ghost knifefish (GBKR010337075~ GBKR010337086) and GBKR010337083 described above contains the longest and complete *WA*-coding sequence. There are two *WB*-containing sequences and GBKR010051454 described above contains complete *WB*-coding sequence.

#### 2-2-21 Black ghost (*Apteronotus albifrons*)

Black ghost *WA* and *WB* sequences were found in GFID01018756.1 (for *WA*) and GFID01018754.1 (for *WB*) through tblastn searches with zebrafish *WA\_13A* and *WB\_13B* sequences, respectively, using TSA databases of bony fishes.

#### 2-2-22 Duckbill knifefish (*Parapteronotus hasemani*)

Duckbill knifefish *WA* and *WB* sequences were found in GGHK01230896.1 (for partial *WA*), GGHK01278630.1 (for partial *WA*) and GGHK01160239.1 (for partial *WB*) through tblastn searches with zebrafish *WA\_13A* (for the first two) and *WB\_13B* (for the last one) sequences using TSA databases of bony fishes. Two *WA* clones have an overlapping region with 11 nucleotides. In Fig. S1D, the combined sequence is shown.

#### 2-2-23 Glass knifefish (*Eigenmannia virescens*)

Glass knifefish *WA* sequence was found in GGJF01002240 through tblastn searches with zebrafish *WA\_13A* sequence using TSA databases of bony fishes. The beginning of this sequence appears to be in the genomic configuration with the presumed splicing signal of AG for *WA*  $\alpha$ 1 domain exon. Glass knifefish *WB* sequence has not been obtained yet.

### 2-2-24 Mexican tetra (*Astyanax mexicanus*)

Mexican tetra *WA* and *WB* sequences were found to correspond to XM\_007254575 (Gene ID: 103042725) (*WA*) and XM\_007254556 (Gene ID: 103034283) (*WB*) through tblastn searches with zebrafish WA\_13A and WB\_13B sequences using the database of nucleotide collection. These Mexican tetra *WA* and *WB* genes were identified in NW\_006749376.1 (“2433 K contig”, 2433507 bp; head to head configuration with respect to the transcriptional orientations; 176 bp between the two methionine-coding start codons) and this contig was later integrated into chromosome 22 (Fig. S11D). Based on these genomic sequences, we amplified *WA* and *WB* cDNAs (for primers, Table S2). After polishing the results, we obtained a single cDNA sequence of *WA* gene and also of *WB* gene, which matched the genomic sequences of *WA* and of *WB* genes, respectively.

### 2-2-25 Tambaqui (*Colossoma macropomum*)

Tambaqui *WA* and *WB* sequences were found in GGHL01010311 (for partial *WA*) and GGHL01049603 (for *WB*) through tblastn searches with zebrafish WA\_13A and WB\_13B sequences, respectively using TSA databases of bony fishes. The last part of the obtained *WA* sequence corresponding to ten amino acid residues is highly divergent compared to those of other closely related species and can be genomic, therefore, this part is not included in Fig. S1D.

## **2-3 Lobe-finned fish – coelacanth and lungfish**

### 2-3-1 African coelacanth (*Latimeria chalumnae*)

At first, *WB* gene was identified in the genome of African coelacanth (34, 35), and then *WA* gene was identified as a gene paired with *WB* gene (Fig. S12A).

African coelacanth *WB* sequence was found to correspond to XM\_014491414.1 (Gene ID: 102352955) through tblastn searches with banded houndshark WB\_DS3 using the database of nucleotide collection of coelacanth. The sequence of XM\_014491414.1 corresponds to a partial  $\beta$ 1 domain plus complete  $\beta$ 2 domain and CP/TM/CY region. Previously, this  $\beta$ 2 domain exon was recognized as MHC class II  $\beta$  chain sequence in the *Mhc* region of African coelacanth (in JH127214.1 as reported in ref. 34). In the present study, complete  $\beta$ 1 domain exon was identified in the genomic sequence of NW\_005819663.1 (1088 K contig, 1088405 bp, same as JH127214.1 mentioned above). Further, the leader-encoding exon of *WB* was identified in BAH001266725 (28764 bp).

Next to this *WB* gene in the genome, there exists another incompletely described MHC gene (XM\_006000942.2, Gene ID: 102353475, annotated as beta-2-microglobulin-like). Our analyses revealed that this gene has some similarity with *WA* genes of other animals. The sequence of XM\_006000942.2 corresponds to the leader,  $\alpha$ 2 domain and CP/TM/CY regions of an  $\alpha$  chain gene of class II-type, *WA*. *WA*  $\alpha$ 1 domain exon was found between the leader and  $\alpha$ 2 domain exons through tblastn searches with zebrafish WA\_13A using the relevant region within the sequence of NW\_005819663.1. African coelacanth *WA* and *WB* genes are present in head to head configuration with respect to the transcriptional orientations and with 2418 bp between the two facing methionine start codons (Fig. S12A).

The expected spliced sequences of African coelacanth *WA* and *WB* genes were found in various SRA sequences, and some of them contain exon-junctions as follows; SRA:DRR002312.90231472.1 of DRX001723 (*WA*, containing the junction between the leader and  $\alpha$ 1 domain exons), SRA:DRR002317.11828674.2 of DRX001727 (*WA*,  $\alpha$ 2 domain and CP/TM/CY exons), SRA:DRR002312.69542290.1 of DRX001723 (*WB*, leader and  $\beta$ 1 domain exons), SRA:DRR002312.69542290.2 of DRX001723 (*WB*,  $\beta$ 1 and  $\beta$ 2 domain exons), SRA:DRR002312.139051261.2 of DRX001723 (*WB*,  $\beta$ 2 domain and CP/TM/CY exons), SRA:DRR002310.108065773.1 of DRX001721 (*WB*, the first and second junctions within CP/TM/CY exons). Only sequences containing the junction between *WA*  $\alpha$ 1 and  $\alpha$ 2 domain exons remain to be found.

### 2-3-2 Indonesian coelacanth (*Latimeria menadoensis*)

Indonesian coelacanth W-category gene sequences were found in SRA databases as described below.



Indonesian coelacanth *WA* partial sequences were found through tblastn searches with African coelacanth *WA\_1\_01* sequence using SRX189185 (liver transcriptome) of Indonesian coelacanth SRA. Representative sequences are as follows: SRR576100.10484394.2, SRR576100.10484394.1, SRR576100.28293161.2. Indonesian coelacanth *WA* partial sequences were also found using SRX189186 (testis transcriptome). Representative sequences are as follows: SRR576101.33151112.1, SRR576101.9789453.1, and SRR576101.33928550.1.

Indonesian coelacanth *WB* partial sequences were found through tblastn searches with African coelacanth *WB\_1\_01* sequence using SRX189185 (liver transcriptome) of Indonesian coelacanth SRA. Representative sequences are as follows: SRR576100.12524173.1, and SRR576100.12524173.2. Indonesian coelacanth *WB* partial sequences were also found using SRX189186 (testis transcriptome). Representative sequences are as follows: SRR576101.10092538.1, SRR576101.2943170.2, and SRR576101.12703814.2.

### 2-3-3 West African lungfish (*Protopterus annectens*)

For this animal, SRA datasets were utilized for the initial detection of W-category genes, and then the full-length coding sequence was amplified from cDNA by PCR experiments. Candidate *WA* and *WB* short cDNA sequences of West African lungfish could be obtained through tblastn searches with zebrafish *WA\_13A* and *WB\_13B* using SRA datasets of West African lungfish. We constructed presumed full-length cDNAs of *WA* and *WB* using SRA datasets, starting with short candidate cDNAs (e. g., SRA:SRR2028017.36937414.2 of SRX1016238 for *WA* and SRA:SRR2028017.1854076.1 of SRX1016238 for *WB*). *WA\_2\_01* and *WB\_2\_1\_01* sequences were amplified from cDNA using presumed gene-specific primers (Table S2) and their complete coding sequences were determined.

West African lungfish *WA\_1* partial sequences were found through tblastn searches with South American lungfish *WA\_1\_01* sequence using SRX1016236 (liver RNA) of West African lungfish SRA. Representative sequences are as follows:

SRR2028021.6417444.1, SRR2028021.24594841.1, and SRR2028021.5460576.1.

West African lungfish *WB\_1* partial sequences were found through tblastn searches with South American lungfish *WB\_1\_01* sequence using SRX1016236 (liver RNA) of West African lungfish SRA. Representative sequences are as follows:

SRR2028021.33310257.1, SRR2028021.24798137.1, and SRR2028021.30422763.1.

### 2-3-4 Slender lungfish (*Protopterus dolloi*)

Slender lungfish W-category gene sequences were found in SRA databases as described below.

Slender lungfish *WA\_1* partial sequences were found through tblastn searches with South American lungfish *WA\_1\_01* sequence using SRX895335 (pelvic fin RNA) of slender lungfish SRA. Representative sequences are as follows: SRR1823814.10055282.2, SRR1823814.5075596.2, and SRR1823814.13757613.1.

Slender lungfish *WA\_2* partial sequences were found through tblastn searches with West African lungfish *WA\_2\_01* sequence using SRX895335 (pelvic fin RNA) of slender lungfish SRA. Representative sequences are as follows: SRR1823814.5579530.2, SRR1823814.9013780.1, and SRR1823814.18055363.1.

Slender lungfish *WB\_1* partial sequences were found through tblastn searches with South American lungfish *WB\_1\_01* sequence using SRX895335 (pelvic fin RNA) of slender lungfish SRA. Representative sequences are as follows: SRR1823814.11266724.1, SRR1823814.9260428.1, and SRR1823814.1607136.2.

Slender lungfish *WB\_2* partial sequences were found through tblastn searches with West African lungfish *WB\_2\_01* sequence using SRX895335 (pelvic fin RNA) of slender lungfish SRA. Representative sequences are as follows: SRR1823814.20167303.2, SRR1823814.2617696.2, and SRR1823814.20167303.1.

### 2-3-5 South American lungfish (*Lepidosiren paradoxa*)

South American lungfish *WA* and *WB* sequences were found in GEHZ01032426.1 (for *WA\_1\_01*) and GEHZ01040013.1 (for *WB\_1\_01*) through tblastn searches with African coelacanth *WA\_1\_01* and *WB\_1\_01* sequences, respectively, using TSA databases of lungfishes.

South American lungfish *WA\_2* and *WB\_2* were not found through tblastn searches with West African lungfish *WA\_2\_01* and *WB\_2\_01* sequences, respectively, using TSA databases of lungfishes.

### 2-3-6 Australian lungfish (*Neoceratodus forsteri*)

The sequence information of Australian lungfish *WA\_1*, *WB\_1*, *WA\_2* and *WB\_2* were obtained through the studies using SRA databases and *WA\_1* and *WB\_2\_2* presumed sequences were constructed using SRA sequences as described below.

Australian lungfish *WA\_1* partial sequences were found through tblastn searches with South American lungfish *WA\_1\_01* sequence using SRX1823846 (pectoral fin RNA) of Australian lungfish SRA. Representative sequences are as follows: SRR3632078.33699611.1, SRR3632078.19590582.1, and SRR3632078.19723085.1.

Australian lungfish *WA\_1* partial sequences were also found through tblastn searches with South American lungfish *WA\_1\_01* sequence using SRX4952748 (dorsal fin RNA) of Australian lungfish SRA. Representative sequences are as follows: SRR8131642.15072763.1, SRR8131642.13478427.2, and SRR8131642.2822953.1.

A presumed complete Australian lungfish *WA\_1* sequence was constructed using many short partial sequences like those described above and the presumed complete amino acid sequence is included in Fig. S1E.

Australian lungfish *WA\_2* partial sequences were found through tblastn searches with West African lungfish *WA\_2\_1\_01* sequence using SRX1823846 (pectoral fin RNA) of Australian lungfish SRA. Representative sequences are as follows: SRR3632078.17728174.2, SRR3632078.16709568.1, and SRR3632078.18029890.1.

Australian lungfish *WB\_1* partial sequences were found through tblastn searches with South American lungfish *WB\_1\_01* sequence using SRX1823846 (pectoral fin RNA) of Australian lungfish SRA. Representative sequences are as follows: SRR3632078.34014254.1, SRR3632078.36687266.1, and SRR3632078.33111091.1.

Australian lungfish *WB\_1* partial sequences were also found through tblastn searches with South American lungfish *WB\_1\_01* sequence using SRX4952748 (dorsal fin RNA) of Australian lungfish SRA. Representative sequences are as follows: SRR8131642.6755488.1, SRR8131642.3977539.2, and SRR8131642.15778735.2.

Australian lungfish *WB\_2\_1* partial sequences were found through tblastn searches with West African lungfish *WB\_2\_1\_01* sequence using SRX1823846 (pectoral fin RNA) of Australian lungfish SRA. Representative sequences are as follows: SRR3632078.37409092.1, SRR3632078.15581747.2, and SRR3632078.24092841.2.

Australian lungfish *WB\_2\_2* partial sequences were found through tblastn searches with West African lungfish *WB\_2\_1\_01* sequence using SRX1823846 (pectoral fin RNA) of Australian lungfish SRA. Representative sequences are as follows: SRR3632078.38307413.1, SRR3632078.35894717.1, and SRR3632078.35767306.1.

A presumed complete Australian lungfish *WB\_2\_2* sequence was constructed using many short partial sequences like those described above and the presumed complete amino acid sequence is included in Fig. S2E.

## **2-4 Tetrapods – salamanders**

Extant amphibians belong to the subclass Lissamphibia which contains the order Anura (e.g., frogs), the order Urodela (e.g., salamanders) and the order Gymnophiona (e.g., caecilians). Thus far, W-category genes were identified in salamanders. Within the order Urodela, two suborders, Cryptobranchoidea and Salamandroidea, diverged from each other earlier than 157 MYA (68). Both Chinese salamander and Hokkaido salamander belong to the same genus *Hynobius* of the family Hynobiidae within the suborder Cryptobranchoidea (which also includes giant salamander). Tiger salamander belongs to Salamandroidea (which also includes axolotl and cynops).

### 2-4-1 Chinese salamander (*Hynobius chinensis*)

Chinese salamander *WA* sequences were found in GAQK01112360 (for the leader and partial  $\alpha 1$  domain) and GAQK01026695 (for the partial  $\alpha 2$  domain and CP/TM/CY region) through tblastn searches with tiger salamander *WA\_01* sequence using TSA databases of amphibians. GAQK01112360 and GAQK01026695 are derived from mRNA of whole body of Chinese salamander larvae. Candidate sequences of the missing last part of the  $\alpha 1$  domain and the beginning of the  $\alpha 2$  domain were obtained from SRA sequence reports (e. g., SRA:SRR1042328.36645099.2 of SRX386518 and SRA:SRR1042328.25098594.1 of SRX386518). For Fig. S1F, we combined two TSA sequences GAQK01112360 and GAQK01026695, and the sequence between these two came from the SRA sequences.

Chinese salamander *WB* sequences were found in GAQK01101790 (for the leader and the beginning of the  $\beta 1$  domain) and GAQK01119707 (for the partial  $\beta 1$  domain plus  $\beta 2$  domain and partial CP/TM/CY region) through tblastn searches with tiger salamander *WB\_01* sequence using TSA databases of amphibians. A region corresponding to four amino acid residues is overlapped by these two sequences. Sequences corresponding to the expected last five amino acids are missing in GAQK01119707. For Fig. S2F, we combined the two TSA sequences, GAQK01101790 for the leader plus the beginning of the  $\beta 1$  domain, and GAQK01119707 for the rest of the molecule except the last part.

#### 2-4-2 Hokkaido salamander (*Hynobius retardatus*)

Hokkaido salamander *WA* and *WB* sequences were found in LE079167.1 (including a complete coding sequence of *WA*) and LE079819.1 (including a complete coding sequence of *WB*) through tblastn searches with tiger salamander *WA\_01* and *WB\_01* sequence, respectively, using TSA databases of amphibians. LE079167.1 and LE079819.1 are derived from mRNA of mixture of brain, gill, head and tail of Hokkaido salamander larvae.

#### 2-4-3 Tiger salamander (*Ambystoma tigrinum*)

Identifications of tiger salamander *WA* and *WB* genes are described below.

A candidate sequence of partial tiger salamander *WA* gene was found in CN053477 through tblastn searches with zebrafish *WA\_13A* using est database of amphibians. 5'- and 3'-RACE reactions were conducted with the primers based on this sequence and with RNA of tiger salamander. Using 5'- and 3'-UTR gene-specific primers, two complete coding sequences (*WA\_01* and *WA\_02*) were amplified from a single individual, which may be alleles (Fig. S1F).

A candidate sequence of salamander *WB* gene was found in Isotig\_96288 through tblastn searches with zebrafish *WB\_13B* sequence using the transcriptome of *Ambystoma mexicanum* (assembly V4.0-Isotigs + Singletons) at the Sal-Site (*Ambystoma* research resource development: R24OD010435). 5'- and 3'-RACE reactions were conducted with primers based on the central part of the genomic sequences of a presumable *WB*  $\beta 2$  domain exon of tiger salamander, which had been isolated with the information of Isotig\_96288. Using 5'- and 3'-UTR gene-specific primers, two complete coding sequences (*WB\_01* and *WB\_02*) could be amplified from a single tiger salamander individual, which may be alleles (Fig. S2F).

#### 2-4-4 Axolotl (*Ambystoma mexicanum*)

Axolotl *WA* and *WB* sequences were found in GFZP01140229 (including  $\alpha 2$  domain and CP/TM/CY region of *WA*) and GFZP01045381 (including a complete coding sequence of *WB*) through tblastn searches with tiger salamander *WA\_01* and *WB\_01* sequence, respectively, using TSA databases of amphibians.

Axolotl *WA* and *WB* sequences were also found in PGSH01013846 ("5397 K contig", 5397334 bp DNA; head to head configuration with respect to the transcriptional orientations; 536 bp between the two methionine-coding start codons) through tblastn searches with tiger salamander *WA\_01* and *WB\_01* sequences using wgs databases of *Ambystoma mexicanum* (Fig. S12B). In this sequence, the leader, the  $\alpha 2$  domain exon and the CP/TM/CY region of *WA*, and the leader, the  $\beta 1$  and  $\beta 2$  domain exons and the partial CP/TM/CY region of *WB* could be identified. In this *WA* gene sequence, no  $\alpha 1$  domain exon, deletions of four nucleotides in the  $\alpha 2$  domain exon, and a deletion of a single nucleotide in the second exon of CP/TM/CY region, were recognized. In *WB* gene sequence, the sequences of the last part corresponding to twenty amino acid residues, are missing. A complete  $\alpha 1$  domain exon of *WA* was found in PGSH01122872 (57652 bp) by tblastn searches using wgs

databases of *Ambystoma mexicanum* with tiger salamander WA\_01 sequence. The DNA sequences of the surrounding regions of WA  $\alpha 1$  domain exon found in PGSH01122872 partially correspond to the sequences present in PGSH01013846.1 and some repetitive sequences were recognized in these contigs, which may have produced sequencing difficulty.

For WA sequence in Fig. S1F, the leader sequence of PGSH01013846, the  $\alpha 1$  domain sequence from PGSH01122872 and the  $\alpha 2$  domain and CP/TM/CY region from GFZP01140229 were combined. For WB sequence in Fig. S2F, WB\_01 sequence from GFZP01045381 was used.

Based on the latest information, the two genomic sequences mentioned above (PGSH01013846 and PGSH01122872) were replaced by PGSH00000000.2. However, W-category sequences could not be found in the newer axolotl wgs databases (JXRH01 and PGSH02), possibly because they may be still included in the unplaced regions and therefore not included in the chromosomal regions. As axolotl WA sequences were found in GFBM010788916.1 (length 1045, WA $\alpha 1$  and first half of  $\alpha 2$ , second half of  $\alpha 2$  and CP/TM/CY portion) and GFBM010763839.1 (length 3323, WA leader portion) through tblastn searches using TSA databases of *Ambystoma mexicanum*, we present Fig. S12B as a useful reference.

### 3. Southern blot analyses of the banded houndshark W-category genes

Because many banded houndshark W-category gene sequences were determined using the banded houndshark individual N1, the Southern blot analyses using DNA of the banded houndshark individual N1 is shown in Fig. S3. In the linkage experiments of Fig. S9, the results of Southern blot analyses were shown with the probes of banded houndshark WA\_DS5, WB\_DS1 and WB\_DS3 using banded houndshark individuals different from N1 and also using different restriction enzymes. The following numbers of loci (in parentheses) are consistent with the results of Southern blot analyses presented in Figs. S3 and S9: banded houndshark WA\_DS5 (3), WA\_DS10 (1), WB\_DS1 (2), WB\_DS3 (1) and  $\beta 2-m$  (1).

In Fig. S10, the uncropped versions of the Southern blots used in Fig. S9 are shown to indicate that there are no additional positive bands in the blots.

### 4. Banded houndshark W-category genes are expressed in various tissues

The expression of the banded houndshark W-category genes was studied using RT-PCR.

Essentially, both WA (WA\_DS5 and WA\_DS10) and WB genes (WB\_DS1\_n1 and WB\_DS3) are expressed in spleen, liver and kidney as shown in Fig. S4. The expression of WA\_DS5 was also detected in blood.

As described in the section 2, cDNA of W-category genes could be isolated from various animals; banded houndshark (kidney, spleen and liver), goldfish (gill), zebrafish (an anterior half of the body), Mexican tetra (gill), West African lungfish (kidney) and tiger salamander (internal organs). Further we could detect W-category cDNA sequences in various transcriptomic databases. Therefore, currently identified W-category genes may be expressed in multiple tissues although W-category subgroup-specific expression patterns might not be excluded and could be observed after further analyses.

### 5. Variation of W-category molecules

In the following sections, general observations about variation of W-category molecules are described. When appropriate data are available, the extent of presumable allelic polymorphism is discussed, since the classical MHC molecules are known to possess extremely high allelic polymorphism in their peptide-binding domains (i.e. membrane-distal domains) and it should be important to know whether W-category molecules also possess such property. Although based on limited information, the available results suggest that the membrane-distal domains of W-category molecules do not possess high allelic polymorphism.

#### 5-1 Variation among W-category molecules in sharks

Banded houndshark possesses two kinds of WA, namely WA\_DS5 and WA\_DS10, and two kinds of WB, namely WB\_DS1 and WB\_DS3. In some other cartilaginous fishes, in addition to these, WA\_Nds3L and WB\_Nds5L are also identified.

Selected amino acid identity % are as follows:

Between banded houndshark WA\_DS5\_n1 and banded houndshark WA\_DS10, 16 % for  $\alpha 1$  domain and 31 % for  $\alpha 2$  domain.

Between banded houndshark WA\_DS5\_n4 and banded houndshark WA\_DS10, 17 % for  $\alpha 1$  and 33 % for  $\alpha 2$ .

Between banded houndshark WA\_DS5\_n1 and great white shark WA\_Nds3L, 10 % for  $\alpha 1$  and 36 % for  $\alpha 2$ .

Between banded houndshark WA\_DS10 and great white shark WA\_Nds3L, 12 % for  $\alpha 1$  and 33 % for  $\alpha 2$ .

Between banded houndshark WA\_DS5\_n1 and great white shark WA\_DS5-like, 84 % for  $\alpha 1$  and 79 % for  $\alpha 2$ .

Between banded houndshark WA\_DS5\_n4 and great white shark WA\_DS5-like, 52 % for  $\alpha 1$  and 78 % for  $\alpha 2$ .

Between banded houndshark WA\_DS10 and great white shark WA\_DS10-like, 56 % for  $\alpha 1$  and 64 % for  $\alpha 2$ .

Between blue shark WA\_Nds3L and great white shark WA\_Nds3L, 47 % for  $\alpha 1$  and 56 % for  $\alpha 2$ .

Between banded houndshark WB\_DS1\_n1 and banded houndshark WB\_DS3, 13 % for  $\beta 1$  and 40 % for  $\beta 2$ .

Between banded houndshark WB\_DS1 and great white shark WB\_Nds5L, 14 % for  $\beta 1$  and 31 % for  $\beta 2$ .

Between banded houndshark WB\_DS3 and great white shark WB\_Nds5L, 15 % for  $\beta 1$  and 26 % for  $\beta 2$ .

Between banded houndshark WB\_DS1\_n1 and great white shark WB\_DS1-like, 48 % for  $\beta 1$  and 78 % for  $\beta 2$ .

Between banded houndshark WA\_DS3 and great white shark WA\_DS3-like, 64 % for  $\beta 1$  and 66 % for  $\beta 2$ .

Between blue shark WB\_Nds5L and great white shark WB\_Nds5L, 63 % for  $\beta 1$  and 73 % for  $\beta 2$ .

#### Variation observed in banded houndshark WA\_DS5

As shown in Fig. S1A, four kinds of *WA\_DS5* cDNA could be identified from the banded houndshark individual N1, namely *WA\_DS5\_n1\_01*, *n2\_01*, *n3\_01* and *n4\_01*. *WA\_DS5\_n1\_01*, *n2\_01* and *n3\_01* possess  $\alpha 1$  domains highly similar to each other while *WA\_DS5\_n4\_01* possesses a highly distinct one (amino acid identity % = 47 ~ 48 % between *n1\_01/n2\_01/n3\_01* and *n4\_01*). Regarding the leader,  $\alpha 2$  domain and CP/TM/CY region, all four possess highly similar sequences (identity = 95 ~ 99 %). Based on our preliminary genomic analyses, *WA\_DS5\_n4\_01* may be situated at a locus (loci) distinct from those of *WA\_DS5\_n1\_01*, *n2\_01* and *n3\_01*. Therefore, currently it is assumed that the variation observed between *WA\_DS5\_n4\_01* and *WA\_DS5\_n1\_01/n2\_01/n3\_01* is not allelic polymorphism but variation observed between distinct loci, although further studies should be necessary to clarify relationships among various *WA\_DS5* members.

#### Variation observed in banded houndshark WA\_DS10

As described in section 2-1-1-2, two kinds of cDNA of *WA\_DS10* were identified from the banded houndshark individual N1. The difference between the two sequences is ascribed to a single nucleotide (C or T) of the third nucleotide position of a codon in the  $\alpha 2$  domain exon, which does not alter the encoded amino acid. This difference was confirmed with multiple clones of independent PCR reactions and also with direct sequencing of the PCR products as described in the Materials and Methods. From the simple pattern of Southern blot results (Figs. S3 and S9), and also from the specific amplification of these cDNAs using 5'- and 3'-UTR primers, it follows that these cDNAs presumably represent allelic sequences.

#### Variation observed in banded houndshark WB\_DS1

As shown in Fig. S2A, two kinds of cDNA of banded houndshark *WB\_DS1\_n1* were identified from the banded houndshark individual N1. These presumably constitute allelic sequences of the *WB\_DS1\_n1* locus. The two sequences show disparity at only two amino acid positions in the membrane-distal  $\beta 1$  domain. The

expression of another *WB\_DS1* gene, *WB\_DS1\_n2*, seems very much limited, as it was only found in an unusual transcript described in the section (2-1-1-2) of banded houndshark *WA\_DS10*.

#### Variation observed in banded houndshark *WB\_DS3*

As shown in Fig. S2B, thus far two kinds of sequences of banded houndshark *WB\_DS3* were obtained from different individuals, *WB\_DS3\_01* from banded houndshark individual N2 and *WB\_DS3\_02* from individual N1. The two sequences show disparity at only two amino acid positions in the Ig-like domain and the CY region and no difference is observed in their membrane-distal  $\beta 1$  domains.

### **5-2 Variation among W-category molecules in teleost fish**

#### 5-2-1 Variation and similarity among W-category molecules in teleost fish

Thus far, in ray-finned fish, W-category genes can be identified in the teleost fish group. Generally, W-category molecules of the teleost fish group share pronounced features as shown in the phylogenetic tree (Fig. 7) and amino acid sequence comparisons (Figs. S1 and S2). Within the teleost fish group, the order Clupeiformes (e.g., Atlantic herring and allis shad) is estimated to have diverged from the superorder Ostariophysi (e.g., zebrafish and Mexican tetra) around 261 MYA (240-282 MYA; ref. 61). Teleost fish WA and WB sequences can be relatively well aligned within each group and amino acid identity percentages between the W-category molecules of Atlantic herring and Mexican tetra are obtained as follows: WA  $\alpha 1$ , 59 %; WA  $\alpha 2$  60 %; WB  $\beta 1$  63 %; WB  $\beta 2$  57 %. As an example of comparison between closely related species, amino acid percentages between the W-category molecules of zebrafish and fathead minnow, both belonging to the family Cyprinidae, are as follows: WA  $\alpha 1$ , 79 %; WA  $\alpha 2$  80 %; WB  $\beta 1$  77 %; WB  $\beta 2$  73 %.

Below, variations of W-category molecules in zebrafish and Chinese cavefish (both belonging to the family Cyprinidae) are described .

#### 5-2-2 Inspection of allelic polymorphism of W-category molecules in zebrafish

To investigate possible presence of high polymorphism in the membrane-distal domains of the W-category molecules of zebrafish, variation of those domains was studied using four different strains of zebrafish with unknown relationships. Using RT-PCR method, the expressed W-category sequences were amplified from an individual zebrafish of four different strains (AB, India [IND], TL and WIK) (zebrafish *WA\_01~05* and zebrafish *WB\_01~05*; Fig. S19, A and B). Analyzing five or more clones of amplified fragment per gene per zebrafish individual, two sequences were obtained from a single individual at most (Fig. S19C). Because only a single pair of *WA/WB* genes can be detected in the genome of zebrafish (Fig. S11E), each obtained sequence can be assumed to be derived from a single locus, *WA* or *WB*. Very limited variation both in the membrane-distal domain of *WA* (Fig. S19A) and in the membrane-distal domain of *WB* (Fig. S19B) was observed. It is concluded that both zebrafish *WA* and *WB* molecules exhibit very limited allelic polymorphism in the membrane-distal domains (*WA*  $\alpha 1$  and *WB*  $\beta 1$ ).

#### 5-2-3 Variation of W-category molecules among closely related species of Chinese cavefish

In the Chinese cavefish, *Sinocyclocheilus*, several W-category sequences can be detected. Chinese cavefish *WA* sequences can be classified into two, A1 and A2, based on similarity with the common carp *WA\_A1* and *WA\_A2* sequences, respectively (Fig. S20A). Similarly, Chinese cavefish *WB* sequences can be classified into two, B1 and B2, based on similarity with the common carp *WB\_B1* and *WB\_B2* sequences, respectively (Fig. S20B). In the common carp contig, *WA\_A1* and *WB\_B1* exist as a pair and are situated very close to each other. In another common carp contig, *WA\_A2* and *WB\_B2* similarly exist as a pair. Inspecting the Chinese cavefish contigs, we confirmed that Chinese cavefish *WA\_A1* and *WB\_B1* constitute a pair, and *WA\_A2* and *WB\_B2* constitute another pair. With these Chinese cavefish sequences, sequences of different but closely related three species of Chinese cavefish could be compared at the same locus. Even between different species of *Sinocyclocheilus*, only a limited amount of variation could be observed in the membrane-distal domains of *WA* and *WB* sequences as shown (Fig. S20).

### **5-3 Variation among W-category molecules in lobe-finned fish**

In lungfish, currently two major subgroups of WA molecules were identified: WA\_1 and WA\_2.

Amino acid identity % are as follows:

Between South American lungfish WA\_1 and Australian lungfish WA\_1, 40 % for  $\alpha$ 1 domain and 70 % for  $\alpha$ 2 domain.

Between South American lungfish WA\_1 and West African lungfish WA\_2, 19 % for  $\alpha$ 1 and 35 % for  $\alpha$ 2.

Between Australian lungfish WA\_1 and West African lungfish WA\_2, 19 % for  $\alpha$ 1 and 33 % for  $\alpha$ 2.

As African coelacanth WA molecule shares some specific amino acid residues with South American lungfish and Australian lungfish WA\_1 molecules (Fig. S1E), African coelacanth WA molecule is temporarily classified as WA\_1 subgroup.

Amino acid identity % are as follows:

Between South American lungfish WA\_1 and African coelacanth WA\_1, 22 % for  $\alpha$ 1 domain and 39 % for  $\alpha$ 2 domain.

Between Australian lungfish WA\_1 and African coelacanth WA\_1, 33 % for  $\alpha$ 1 and 43 % for  $\alpha$ 2.

Between African coelacanth WA\_1 and West African lungfish WA\_2, 13 % for  $\alpha$ 1 and 32 % for  $\alpha$ 2.

In lungfish, currently two major subgroups of WB molecules were identified: WB\_1 and WB\_2. Temporarily, WB\_2 can be further classified into two groups: WB\_2\_1 and WB\_2\_2.

Amino acid identity % are as follows:

Between South American lungfish WB\_1 and West African lungfish WB\_2\_1, 18 % for  $\beta$ 1 domain and 32 % for  $\beta$ 2 domain.

Between South American lungfish WB\_1 and Australian lungfish WB\_2\_2, 18 % for  $\beta$ 1 and 29 % for  $\beta$ 2.

Between West African lungfish WB\_2\_1 and Australian lungfish WB\_2\_2, 37 % for  $\beta$ 1 and 58 % for  $\beta$ 2.

As African coelacanth WB molecule shares some specific amino acid residues with South American lungfish WB\_1 molecule (Fig. S2E), African coelacanth WB molecule is temporarily classified as WB\_1 subgroup.

Amino acid identity % are as follows:

Between South American lungfish WB\_1 and African coelacanth WB\_1, 22 % for  $\beta$ 1 domain and 47 % for  $\beta$ 2 domain.

Between West African lungfish WB\_2\_1 and African coelacanth WB\_1, 15 % for  $\beta$ 1 and 32 % for  $\beta$ 2.

Between Australian lungfish WB\_2\_2 and African coelacanth WB\_1, 18 % for  $\beta$ 1 and 32 % for  $\beta$ 2.

As already described in the previous section 2-3 and summarized in Table S1, WA\_1 sequence could be identified in West African lungfish, and WA\_2 sequence could be identified in Australian lungfish based on the investigation using SRA databases. Similarly, WB\_1 sequence could be identified in West African lungfish and also in Australian lungfish, WB\_2\_1 sequence could be identified in Australian lungfish, and WB\_2\_2 sequence could be identified in West African lungfish.

#### **5-4 Variation among W-category molecules in salamanders**

Between the Chinese salamander and the Hokkaido salamander, which both belong to the same genus *Hynobius*, only a small number of amino acid differences could be observed in the membrane-distal domains (96 % amino acid identity for WA and 97 % for WB).

Between the two suborders, Salamandroidea and Cryptobranchoidea, W-category molecules exhibit a relatively divergent nature in their membrane-distal domains while they exhibit more conserved nature in the Ig-like domains as shown in Figs. S1 and S2. For example, the amino acid identity percentages between tiger salamander WA\_01 (Salamandroidea) and Hokkaido salamander (Cryptobranchoidea) WA\_01 are as follows: 52 % in WA  $\alpha$ 1 domain and 76 % in WA  $\alpha$ 2 domain. Those between tiger salamander WB\_01 and Hokkaido salamander (Cryptobranchoidea) WB\_01 are as follows: 35 % in WB  $\beta$ 1 domain and 64 % in WB  $\beta$ 2 domain.

From a single individual tiger salamander, presumed alleles of two WA and also presumed alleles of two WB sequences could be isolated as shown in Figs. S1 and S2. In the membrane-distal domains, they show a small number of amino acid differences (95 % amino acid identity for WA and 98 % for WB).

## 6. Conserved features at the I $\alpha$ 3/ $\beta$ <sub>2</sub>-m interface

I $\alpha$ 3 P57 and  $\beta$ <sub>2</sub>-m Y8 are highly conserved in class I molecules at the I $\alpha$ 3/ $\beta$ <sub>2</sub>-m interface (e. g., human, 1DLH of PDB ID; mouse, 2VAA; chicken, 3BEV; and grass carp, 5Y91) and these residues are highly conserved at the corresponding positions of W-category molecules (in the WB  $\beta$ <sub>2</sub> domain and WA  $\alpha$ <sub>2</sub> domain). In Fig. S6A, the positions of I $\alpha$ 3 P57 and  $\beta$ <sub>2</sub>-m Y8 in HLA-A2, which interact through a hydrogen bond, are shown at the I $\alpha$ 3/ $\beta$ <sub>2</sub>-m interface. In Fig. S6B, the corresponding interface in the MHC class II molecule, namely, the IIB $\beta$ 2/IIA $\alpha$ 2 interface is shown. Although some class II molecules possess Y8 in IIA $\alpha$ 2, there is no conserved P57 in IIB $\beta$ 2 (Fig. 3; Dataset S2).

## 7. $\beta$ <sub>2</sub>-m K67 can form an intra-domain hydrogen bond

$\beta$ <sub>2</sub>-m K67 is one of the amino acid residues shared between the WA  $\alpha$ <sub>2</sub> domain and  $\beta$ <sub>2</sub>-m, which are shaded in red color in Fig. 3 and Dataset S2. Because phylogenetically relatively primitive jawed vertebrates such as grass carp possess a lysine (K) at this position in their  $\beta$ <sub>2</sub>-m molecules, the structural features of  $\beta$ <sub>2</sub>-m K67 can be studied for grass carp  $\beta$ <sub>2</sub>-m (69) (PDB: 3GBL and 5Y91; Fig. S7). As reported previously (69), a hydrogen atom from the  $\epsilon$ -amino group of grass carp  $\beta$ <sub>2</sub>-m K67 forms hydrogen bonds with a main chain carbonyl oxygen of  $\beta$ <sub>2</sub>-m I35 [Fig. S7A, length of hydrogen bond = 2.75 Å] and also with a  $\gamma$ -carboxyl oxygen of  $\beta$ <sub>2</sub>-m E36 [Fig. S7B, length of hydrogen bond = 3.54 Å]. At position 35 of the WA  $\alpha$ <sub>2</sub> domain and also of  $\beta$ <sub>2</sub>-m, an isoleucine (I) is often replaced by other amino acid residues. Because a main chain carbonyl oxygen is involved in the hydrogen bonds between  $\beta$ <sub>2</sub>-m I35 and  $\beta$ <sub>2</sub>-m K67, the conservation of this hydrogen bond is assumed in the WA  $\alpha$ <sub>2</sub> domain as well as in  $\beta$ <sub>2</sub>-m of other phylogenetically relatively primitive vertebrates. In addition, as seen in Fig. S7, grass carp  $\beta$ <sub>2</sub>-m L37, which also corresponds with residues shaded in red color in the  $\beta$ <sub>2</sub>-m and WA  $\alpha$ <sub>2</sub> domain sequences (Fig. 3 and Dataset S2), is positioned close to  $\beta$ <sub>2</sub>-m K67 in the three-dimensional structure (69). It is notable that the classical class I  $\alpha$ <sub>3</sub> domain of all cartilaginous fish (Dataset S2) possess both I  $\alpha$ <sub>3</sub>L37 and I  $\alpha$ <sub>3</sub>K/R68, and independent acquisitions of L37 plus K/R68 might have occurred in  $\beta$ <sub>2</sub>-m and in the classical class I  $\alpha$ <sub>3</sub> domain of cartilaginous fish.

## 8. Linkage between the banded houndshark $\beta$ <sub>2</sub>-m gene and the *Mhc* region

The banded houndshark  $\beta$ <sub>2</sub>-m gene was isolated using PCR based on information of cartilaginous  $\beta$ <sub>2</sub>-m genes, and has been deposited in GenBank (HQ630063 for the *Triakis scyllium*  $\beta$ <sub>2</sub>-m mRNA and HQ634972 for the *Triakis scyllium*  $\beta$ <sub>2</sub>-m gene). The primer sequences for the amplification of the transcript of  $\beta$ <sub>2</sub>-m are listed in Table S2.

Linkage analysis was conducted using a previously described panel of seventeen littermate sharks (17). The PCR products (~3.8 kb) of banded houndshark  $\beta$ <sub>2</sub>-m gene, amplified with two primers (F11 and R10, Table S2), were digested with the restriction enzyme, *Mbo*II, to detect distribution of allelic variation among the littermates and their mother.

Figure S15A shows an additional band in six samples, indicated with an arrow. Classification with or without the additional band is in complete concordance with the haplotype classification obtained for the classical MHC genes (Fig. S9; 17). This pattern also matches those reported for complement *C4* and *Bf* genes of banded houndshark which were concluded to be linked with the classical MHC genes (70). Using sample No. 12, the region of interest was sequenced (Fig. S15B) and seven nucleotides were revealed as responsible for the additional band.

In conclusion, the results indicate that the banded houndshark  $\beta$ <sub>2</sub>-m gene is linked with the *Mhc* region, as reported previously for nurse shark (28).



## 9. Specific interaction between WA and WB

As W-category *WA* and *WB* genes are present close to each other as a pair in the genome of sharks, teleost fish, coelacanth and salamander like MHC class II genes (Figs. S11 and S12; *SI Appendix*), the protein products of these genes are expected to form a heterodimer (2, 3). Both classical MHC class I and class II molecules form a heterodimer in the endoplasmic reticulum, and after they bind appropriate peptide ligands at their respective intracellular locations, they are transported and expressed on the cell surface. Although it is not clear whether W-category molecules bind any ligands, which might be necessary for stabilization and efficient transport, possible intracellular processing and cell surface expression of recombinant W-category proteins of tiger salamander was investigated using Western blotting and flow cytometry. Total protein lysates of the cells used for the flow cytometry experiments were also analyzed by Western blotting. The results shown in Fig. 6 and Figs. S13 and S14 are representatives of several independent experiments with similar results.

### Processing of recombinant $\alpha$ and $\beta$ chain proteins of a tiger salamander W-category molecule

Figure 6 confirmed the production of recombinant WA (Fig. 6A) and WB (Fig. 6B) proteins by transfected cells. Further, apparent higher molecular weight species were observed only when both WA and WB of tiger salamander were simultaneously introduced into cells [Fig. S6A (d) for WA; Fig. S6B (d) for WB], compared to the controls [Fig. S6A (b) and (f) for WA; Fig. S6B (c) for WB]. The apparent size differences can be ascribed to different N-glycosylations of proteins as shown by the digestion of the samples with Endo H [Fig. 6C (b) and (d)] or GPF [Fig. 6D (b) and (d)]. In case of the transfectants with both WA and WB of tiger salamander, the WA protein fractions of relatively lower molecular weight could be digested with Endo H while the protein fractions of higher molecular weight could not be [Fig. 6C (d)], suggesting that those undigested proteins possess an Endo H-resistant complex glycan structure. This was confirmed by the experiments which showed that those proteins of higher molecular weight actually could be digested with GPF [Fig. 6D (d)]. In contrast, in the controls in which tiger salamander WA plus empty PA vector [Fig. 6C (b)] or tiger salamander WA plus Mexican tetra WB [Fig. 6C (f)] were present, all WA proteins could be digested with Endo H. Regarding the additional band of higher molecular weight of WB protein detected in Fig. 6B (d), this particular band became obscure (possibly due to protein aggregation) with a digestion protocol without addition of enzymes (mock treatment) (Fig. S14). Therefore, in case of WB proteins, a conclusion could not be drawn about its detailed glycosylation state.

Thus, when both WA and WB of a tiger salamander were introduced into cells, the molecular species of higher molecular weight were observed for both WA and WB. In case of WA, these molecular species were apparently produced by the advanced glycosylation processing.

For the possible N-glycosylation sites, the following multiple asparagines could be mentioned solely based on the sequence information of tiger salamander WA\_01 and WB\_01:

WA $\alpha$ 1, N26, N119 (numbers are based on Dataset S1); WA $\alpha$ 2, N60, N97 (based on Dataset S2); WA CP region, N14 (based on Dataset S3); WB $\beta$ 2, N34, N60, N97 (based on Dataset S2).

### Cell surface expression of recombinant $\alpha$ and $\beta$ chain proteins of a tiger salamander W-category molecule

Figure 6E and F shows that the recombinant WA ( $\alpha$  chain) and WB ( $\beta$  chain) of a tiger salamander W-category molecule could be observed on the cell surface only when these two chains were simultaneously introduced into cells. Namely, for the detection of  $\alpha$  chains, low but reproducible binding of anti-FLAG antibody to FLAG-tagged WA on the cell surface could be observed only in the presence of both tiger salamander WA and WB [Fig. 6E (d)] in contrast to the controls in which tiger salamander WA plus empty PA vector [Fig. 6E (b)] or tiger salamander WA plus Mexican tetra WB [Fig. 6E (f)] were introduced. For the detection of  $\beta$  chains, significant binding of anti-PA antibody to PA-tagged WB on the cell surface could be observed only in the presence of both tiger salamander WA and WB [Fig. 6F (d)] in contrast to the controls in which empty FLAG vector plus tiger salamander WB [Fig. 6F (c)] or tiger salamander WA plus Mexican tetra WB [Fig. 6F (f)] were introduced.

Taken together, both the recombinant WA and WB proteins of a tiger salamander W-category molecule were processed differently from controls and could be detected on the cell surface, only when these two tiger

salamander chains were simultaneously introduced into cells. These results indicate a specific interaction between recombinant WA and WB chains of a tiger salamander W-category molecule.

## **10. Conservation profile of the teleost fish W-category membrane-distal domains and molecular modeling of the extracellular domains of W-category molecule**

### **10-1 The teleost fish W-category membrane-distal domains show a unique conservation profile**

To gain insight into the nature of W-category molecules, the conservation profile was investigated in the membrane-distal domains of teleost fish W-category molecules. The membrane-distal domains of the classical MHC class I and class II molecules are known to be highly polymorphic and critically responsible for peptide ligand-binding. The present investigation became possible because a large number of sequences of the teleost fish W-category genes could be identified from various fish species.

More than twenty sequences of WA and WB were compared (Figs. S1 and S2) and the Wu-Kabat variability (described in the Materials and Methods) was calculated (Table S4). Originally Wu-Kabat variability was used to study the variable nature of immunoglobulins, but later also used to study the polymorphic nature of the membrane-distal domains of MHC molecules (e. g., 17, 71, 72). The conservation profile, i. e., the patterns of positions of highly conserved and variable residues were found to be remarkably similar between the teleost fish W-category molecules and MHC-Z molecules (Fig. S21). MHC-Z molecules are ancient nonclassical class I molecules which possess most of the peptide-termini-binding amino acid residues of the classical MHC class I molecules; compared to most classical MHC class I molecules in non-mammalian jawed vertebrates, they possess seven out of eight such residues, although their possible (peptide) ligand(s) has not been clarified yet (36-38). In contrast, these eight amino acid residues are not conserved in the teleost fish W-category molecules (Fig. S21). Previously, the positions of the conserved residues among MHC-Z molecules have been revealed to correspond to the peptide-binding positions of the classical MHC class I molecules (38). In the present study, the positions of conserved residues among the teleost fish W-category molecules (Table S4) were found to correspond to those of peptide-binding residues of the classical MHC class I molecules and also of the classical MHC class II molecules (Fig. S21). Based on Fig. S21 and the structure of HLA-A2, the hypothetical membrane-distal domains of the teleost fish W-category molecule are shown in Fig. S22. More than 80 % of the peptide binding positions of the HLA-A2 molecule correspond to highly conserved positions of the teleost fish W-category molecules (Figs. S21 and S22). In the  $\alpha$ -helical regions, many positions of the HLA-A2 residues that point away from the binding groove (25) correspond to highly variable residues in the teleost fish W-category molecules (Fig. S22 and Table S4).

The present study suggests that the teleost fish W-category subgroup molecules may bind some conserved ligands in their presumed groove, although in the teleost fish W-category molecules, neither the eight amino acid residues of the classical MHC class I molecules which interact with the peptide termini of a bound peptide nor the four amino acid residues of the classical MHC class II molecules which interact with the main chain residues of a bound peptide are conserved (Fig. S21).

### **10-2 Molecular modeling of the extracellular domains of W-category molecule**

For the prediction of the protein structure of the W-category molecules, we used protein modeling tools such as Phyre2 (90) and SWISS-MODEL (91), although there exist various limitations for such analyses. We briefly show here some selected results obtained with Phyre2 and SWISS-MODEL, and compared to our predicted alignment and structure (Figs. S21 and S22) of the membrane-distal domains of the teleost fish W-category molecule which was obtained based on the conservation profile.

For both protein modeling softwares, we used five query sequences.

1. allis shad WA  $\alpha$ 1 (a single domain)
2. allis shad WA  $\alpha$ 2 (a single domain)
3. allis shad WA all (a whole sequence including signal peptide and CP/TM/CY regions)
4. allis shad WB all (a whole sequence including signal peptide and CP/TM/CY regions)

5. allis shad WA  $\alpha$ 1 + WB  $\beta$ 1 $\beta$ 2 (artificially combined three-domains sequence)

Further, for SWISS-MODEL, we used the following sequences for hetero oligomeric protein analyses.

6. allis shad WA all / WB all (two sequences, four extracellular domains, class II-type model)

7. allis shad (WA  $\alpha$ 1 + WB  $\beta$ 1 $\beta$ 2) / WA  $\alpha$ 2 (two sequences, four extracellular domains, class I-type model)

In the last part of this section, we present the following results obtained with the modeling programs in this order.

## Representative results of the modeling analyses using Phyre2 or SWISS-MODEL

## Representative results of the 3D modeling in the Phyre2 analyses

## Representative results of the alignments in the Phyre2 analyses

## Representative results of the 3D modeling in the SWISS-MODEL analyses

## Representative results of the alignments in the SWISS-MODEL analyses

### 10-2-1 Overall comparison

Phyre2 and SWISS-MODEL produced multiple predicted structural models of the teleost fish W-category molecule. The models of the teleost fish W-category molecule are basically similar to those of the classical MHC class I and also to those of the classical MHC class II molecules. In the two membrane-proximal Ig-like domains, namely, WA  $\alpha$ 2 and WB  $\beta$ 2 domains, especially high similarity and highly probable alignments were obtained in various model cases. In the membrane-distal domains, highly probable alignment in WB  $\beta$ 1 domain were obtained whereas especially the second half of the WA  $\alpha$ 1 domain (namely,  $\alpha$ -helix region) showed variations.

With the [allis shad WB all] sequence or with the [allis shad WA $\alpha$ 1WB $\beta$ 1 $\beta$ 2] sequence as a query sequence, the  $\alpha$ 2 and  $\alpha$ 3 domains of various class I sequences were obtained as templates for the corresponding WB $\beta$ 1 $\beta$ 2 sequence. The alignment for the WB  $\beta$ 1 sequence including the  $\alpha$ -helix region is highly similar between those obtained with the models (both Phyre2 and SWISS-MODEL) and that of Fig. S21. Therefore, the proposed alignment shown in Fig. S21 was basically similar to the models except for the  $\alpha$ -helix region of WA  $\alpha$ 1 domain. Further, even for WA  $\alpha$ 1 domain, some models showed the alignments similar to that of Fig. S21 in the  $\alpha$ -helix region to some extent. One example was obtained in the following model, in which the consecutive 28 amino acid positions of the last part of the WA  $\alpha$ 1 domain are consistent with the alignment of Fig. S21: allis shad WA all / WB all, SWISS-MODEL No. 1 template 3pdo.1 Human MHC class I HLA-DR1 (class II-type model).

If the two presumed  $\alpha$ -helix structures are reasonably apart from each other and there exists a “groove”, some conserved ligand may be expected. As described above, W-category molecule possesses neither the eight amino acids highly conserved in the classical MHC class I for the binding to the bound peptide termini nor the four amino acids highly conserved in the classical MHC class II for the binding to the main chain of a bound peptide. However, W-category could bind a peptide with the principle different from the classical MHC class I and also different from the classical MHC class II. Clarification of possible ligand(s) including peptides remains to be investigated.

### 10-2-2 Molecular modeling of the inter-domain interfaces of W-category molecule

In the model of [allis shad WA all/WB all] and [allis shad (WA $\alpha$ 1 +WB $\beta$ 1 $\beta$ 2/WA $\alpha$ 2)], amino acid residues like WA $\alpha$ 2W61 and Y57 can be found in the interface between WA $\alpha$ 1/WB $\beta$ 1 and WA $\alpha$ 2 domains (in the pictures shown below). This has been expected because  $\alpha$ 1 and  $\alpha$ 2 domains of class II molecule superimpose closely on the corresponding  $\alpha$ 1 domain and the  $\beta$ 2-m, respectively, of class I, and  $\beta$ 1 and  $\beta$  2 domains of class II superimpose on the  $\alpha$ 2 and less closely on the  $\alpha$ 3, respectively, of class I, as described by Brown et al. (27), and in our analyses, [allis shad WA all/WB all] sequence has class II-type domain architecture and [allis shad (WA $\alpha$ 1 + WB $\beta$ 1 $\beta$ 2/WA $\alpha$ 2)] sequence has class I-type domain architecture. However, the existence

of those amino acid residues like W61 in the relevant interface, should be checked with the model, which can consider structural distortions, unfavorable interactions and clashes.

In the class I molecules,  $\beta_2$ -m W61 interacts with  $\alpha 2$ Q6 and  $\alpha 2$ D37 through hydrogen bonds. Although in the class II-type model of [allis shad WA all/WB all], the oxygen of WB $\beta 1$ D37 is not close to the nitrogen of WA $\alpha 2$ W61, they are very closely located to each other in the class I-type model of [allis shad (WA $\alpha 1$  +WB $\beta 1$  $\beta 2$ /WA $\alpha 2$ )]. In both models, however, the nitrogen of WB  $\beta 1$ Q6 is very close to the oxygen of main chain of WA $\alpha 2$ W61. For the modeling of W-category molecule, class I-type modeling appear to produce a better model with respect to the domain-interfaces.

In the  $\alpha 3$ /  $\beta_2$ -m interface of a class I molecule,  $\beta_2$ -m Y8 interacts with  $\alpha 3$ P57 through hydrogen-bonding. In the corresponding WB $\beta 2$ / WA $\alpha 2$  interface of the model, WB $\beta 2$ P57 can also be found in the positions very close to WA $\alpha 2$ Y8 in case of class I-type model and not class II-type model.

Apparently, currently there is no highly appropriate template for the modeling which fulfills requirements for both domain architecture and domain-interfaces.

Future structural determination of W-category molecules should reveal the details of the inter-domain interfaces and the structure of the membrane-distal domains, and further possible ligand(s).

## Representative results of the modeling analyses using Phyre2 or SWISS-MODEL

Some explanations in the softwares:

“Rank” in Phyre2 means that “models are ranked according to raw alignment score”.

“Confidence” in Phyre2 is “the probability that the query sequence and the template are homologous”.

“GMQE” in SWISS-MODEL means “Global Model Quality Estimate”.

Numbers in red, shown in the columns of “Rank” or “No.,” indicate the modeling results with the alignments and 3D models shown later.

### 1. allis shad WA $\alpha$ 1

#### Phyre2 allis shad WA $\alpha$ 1

| Rank      | Confidence | Template information                      | Template | Sequence Identity % |
|-----------|------------|-------------------------------------------|----------|---------------------|
| 1         | 37.7       | Rum1-related protein                      | c4idiA   | 40                  |
| 2         | 23.0       | Alpha-amylases                            | d1j0ha2  | 32                  |
| 3         | 19.7       | Alpha-amylases                            | d1m53a1  | 33                  |
| 4         | 17.8       | Alpha-amylases                            | d1uoka1  | 38                  |
| 5         | 14.6       | Mouse idothyronine deiodinase 3           | c4tr3A   | 25                  |
| 6         | 12.8       | Human nonclassical class I ZAG $\alpha$ 1 | c1t7wA   | 15                  |
| 7         | 11.1       | Alanine racemase                          | d1d7ka1  | 34                  |
| 8         | 9.9        | Alpha amylases                            | d1wzla2  | 32                  |
| 9         | 9.6        | Alpha amylases                            | d1jl1a2  | 26                  |
| <b>10</b> | 8.6        | Marsupial MHC class I $\alpha$ 1          | c7edoA   | 17                  |

#### SWISS-MODEL allis shad WA $\alpha$ 1

| No.      | GMQE | Template information                  | Template | Sequence Identity % |
|----------|------|---------------------------------------|----------|---------------------|
| <b>1</b> | 0.19 | Mouse MHC class II IA $\alpha$ 1      | 6blr.1.A | 10.00               |
| 2        | 0.19 | Mouse MHC class II A-D $\alpha$ 1     | 6dfs.1.C | 10.00               |
| 3        | 0.17 | Human MHC class II HLA-DQ8 $\alpha$ 1 | 1jk8.1.A | 5.88                |
| 4        | 0.09 | Beta-glucosidase 1                    | 4iib.1.A | 12.2                |
| 5        | 0.09 | Beta-glucosidase                      | 5ju6.1.A | 4.88                |
| 6        | 0.09 | Beta-glucosidase                      | 5fjj.1.A | 12.50               |
| 7        | 0.06 | Alpha-amylase                         | 1ob0.1.A | 20.83               |
| 8        | 0.06 | Alpha-1, 4-glucan-4-glucanohydrolase  | 1bpl.1.B | 21.74               |
| 9        | 0.05 | Amylase                               | 6toy.1.A | 20.00               |

## 2. allis shad WA $\alpha$ 2

### Phyre2 allis shad WA $\alpha$ 2

| Rank     | Confidence | Template information                                   | Template | Sequence Identity % |
|----------|------------|--------------------------------------------------------|----------|---------------------|
| 1        | 99.9       | Human MHC nonclassical class II HLA-DO                 | c3usaG   | 29                  |
| <b>2</b> | 99.9       | Human MHC class II HLA-DR                              | c4aenA   | 31                  |
| 3        | 99.9       | Chicken MHC class II                                   | c6kvmA   | 28                  |
| 4        | 99.9       | Human MHC class II HLA-DR                              | c2q6wD   | 31                  |
| 5        | 99.9       | Human MHC class II HLA-DP                              | c3lqzA   | 29                  |
| 6        | 99.9       | Antibody constant domain-like                          | d1klub1  | 35                  |
| 7        | 99.9       | Antibody constant domain-like                          | d1klua1  | 31                  |
| 8        | 99.9       | Antibody constant domain-like                          | d1es0a1  | 24                  |
| 9        | 99.9       | Antibody constant domain-like                          | d1fnga1  | 32                  |
| 10       | 99.9       | Antibody constant domain-like                          | d1iaka1  | 24                  |
| 21       | 99.9       | Human nonclassical class I MR1 $\beta$ <sub>2</sub> -m | c4gupB   | 42                  |

### SWISS-MODEL allis shad WA $\alpha$ 2

| No.      | GMQE | Template information                                      | Template | Sequence Identity % |
|----------|------|-----------------------------------------------------------|----------|---------------------|
| <b>1</b> | 0.79 | Mouse MHC class I H-2Kb $\beta$ <sub>2</sub> -m           | 2qri.2.A | 39.13               |
| 2        | 0.79 | HLA-A with H-2K $\alpha$ 3 domain $\beta$ <sub>2</sub> -m | 6e1i.1.A | 41.30               |
| 3        | 0.79 | Mouse MHC class I H-2Kb $\beta$ <sub>2</sub> -m           | 5oqg.2.A | 39.13               |
| 4        | 0.79 | Mouse MHC class I H-2Db $\beta$ <sub>2</sub> -m           | 6mp1.1.A | 39.13               |
| 5        | 0.79 | Rat MHC class I $\beta$ <sub>2</sub> -m                   | 1kju.1.B | 39.13               |
| 6        | 0.79 | Mouse MHC class I H-2Kb $\beta$ <sub>2</sub> -m           | 2qrt.1.A | 39.13               |
| 7        | 0.78 | Mouse MHC class I H-2Kb $\beta$ <sub>2</sub> -m           | 2qri.1.A | 39.13               |
| 8        | 0.78 | Chicken MHC class I BF $\beta$ <sub>2</sub> -m            | 6lhf.1.B | 39.78               |
| 9        | 0.78 | Chicken MHC class I BF $\beta$ <sub>2</sub> -m            | 6lhg.1.B | 39.78               |
| 10       | 0.78 | Mouse MHC class I H-2Kb $\beta$ <sub>2</sub> -m           | 5oqg.1.A | 39.13               |

### 3. allis shad WA all

#### Phyre2 allis shad WA all

| Rank     | Confidence | Template information                          | Template | Sequence Identity % |
|----------|------------|-----------------------------------------------|----------|---------------------|
| <b>1</b> | 100.0      | Chicken MHC class II $\alpha 1\alpha 2$       | c6kvmA   | 19                  |
| 2        | 100.0      | Human MHC class II HLA-DM $\alpha 1\alpha 2$  | c2bc4C   | 16                  |
| 3        | 100.0      | Human MHC class II HLA-DO $\alpha 1\alpha 2$  | c3usaG   | 20                  |
| 4        | 100.0      | Mouse MHC class II H-2 I-A $\alpha 1\alpha 2$ | c1f3jD   | 18                  |
| 5        | 100.0      | Human MHC class II HLA-DR $\alpha 1\alpha 2$  | c1sebB   | 22                  |
| 6        | 100.0      | Mouse MHC class I H-2K $\alpha 2\alpha 3$     | c3tidA   | 20                  |
| 7        | 100.0      | Chicken MHC class I Rfp-Y $\alpha 2\alpha 3$  | c3p73A   | 22                  |
| 8        | 100.0      | Mouse MHC class I H-2K $\alpha 2\alpha 3$     | c2clvA   | 20                  |
| 9        | 100.0      | Human MHC class II HLA-DQ $\alpha 2\alpha 3$  | c1s9vA   | 20                  |
| 10       | 100.0      | Mouse MHC class I H-2K $\alpha 2\alpha 3$     | c1kj2I   | 20                  |

#### SWISS-MODEL allis shad WA all

| No.      | GMQE | Template information        | Template | Sequence Identity % |
|----------|------|-----------------------------|----------|---------------------|
| <b>1</b> | 0.47 | Human MHC class II HLA-DR1  | 1aqd.1.B | 21.39               |
| 2        | 0.47 | Human MHC class II HLA-DR1  | 1aqd.4.B | 21.39               |
| 3        | 0.47 | Human MHC class II HLA-DQB1 | 5ksa.1.B | 20.21               |
| 4        | 0.46 | Human MHC class II HLA-DRB1 | 3pgd.1.B | 21.16               |
| 5        | 0.45 | Human MHC class II HLA-DRB1 | 3pdo.1.B | 21.16               |
| <b>6</b> | 0.44 | Mouse MHC class I H-2 D-B   | 6h6d.1.A | 19.91               |
| 7        | 0.44 | Mouse MHC class I H-2 D-B   | 1s7u.1.A | 19.91               |
| 8        | 0.44 | Mouse MHC class I H-2 D-B   | 1s7v.1.A | 19.91               |
| 9        | 0.43 | Mouse MHC class I H-2 D-B   | 1s7u.3.A | 19.91               |
| 10       | 0.43 | Mouse MHC class I H-2 D-B   | 1s7u.2.A | 19.91               |

#### 4. allis shad WB all

##### Phyre2 allis shad WB all

| Rank     | Confidence | Template information                         | Template | Sequence Identity % |
|----------|------------|----------------------------------------------|----------|---------------------|
| <b>1</b> | 100.0      | Chicken MHC class I B21 $\alpha 2\alpha 3$   | c2yf6A   | 19                  |
| 2        | 100.0      | Chicken MHC class I Rfp-Y $\alpha 2\alpha 3$ | c3p73A   | 19                  |
| 3        | 100.0      | Mouse MHC class I H-2 K $\alpha 2\alpha 3$   | c1kj3H   | 19                  |
| 4        | 100.0      | Mouse MHC class I H-2 K $\alpha 2\alpha 3$   | c2clvA   | 19                  |
| 5        | 100.0      | Mouse MHC class I H-2 K $\alpha 2\alpha 3$   | c3tidA   | 19                  |
| 6        | 100.0      | Mouse MHC class I H-2 K $\alpha 2\alpha 3$   | c1nanH   | 19                  |
| 7        | 100.0      | Mouse MHC class I H-2 K $\alpha 2\alpha 3$   | c1kj2I   | 19                  |
| 8        | 100.0      | Mouse MHC class I H-2 K $\alpha 2\alpha 3$   | c2zswA   | 19                  |
| 9        | 100.0      | Mouse MHC class I H-2 K $\alpha 2\alpha 3$   | c2zswC   | 19                  |
| 10       | 100.0      | Mouse MHC class I H-2 K $\alpha 2\alpha 3$   | c2zswG   | 19                  |

##### SWISS-MODEL allis shad WB all

| No.      | GMQE | Template information                               | Template | Sequence Identity % |
|----------|------|----------------------------------------------------|----------|---------------------|
| <b>1</b> | 0.43 | Chicken MHC class I Rfp-Y $\alpha 2\alpha 3$       | 3p77.1.A | 20.32               |
| 2        | 0.41 | Human nonclassical class I MR1 $\alpha 2\alpha 3$  | 6w9u.2.A | 24.04               |
| 3        | 0.41 | Chicken MHC class I B2 $\alpha 2\alpha 3$          | 4cvx.1.A | 20.32               |
| 4        | 0.41 | Human nonclassical class I ZAG $\alpha 2\alpha 3$  | 1zag.1.A | 21.51               |
| 5        | 0.40 | Chicken MHC class I B2 $\alpha 2\alpha 3$          | 4d0d.1.A | 20.32               |
| 6        | 0.40 | Human nonclassical class I FcRn $\alpha 2\alpha 3$ | 6fgb.1.A | 19.82               |
| 7        | 0.40 | Human nonclassical class I ZAG $\alpha 2\alpha 3$  | 1zag.3.A | 21.51               |
| 8        | 0.40 | Human nonclassical class I ZAG $\alpha 2\alpha 3$  | 1t7v.1.A | 20.97               |
| 9        | 0.39 | Human nonclassical class I ZAG $\alpha 2\alpha 3$  | 3es6.1.A | 20.97               |
| 10       | 0.39 | Human MHC class I HLA-B7 $\alpha 2\alpha 3$        | 6at5.1.A | 18.60               |



5. allis shad (WA  $\alpha 1$  + WB  $\beta 1\beta 2$ )

Phyre2 allis shad (WA  $\alpha 1$  + WB  $\beta 1\beta 2$ )

| Rank     | Confidence | Template information                                        | Template | Sequence Identity % |
|----------|------------|-------------------------------------------------------------|----------|---------------------|
| 1        | 100.0      | Mouse nonclassical class I CD1 $\alpha 1\alpha 2\alpha 3$   | c1cd1C   | 17                  |
| <b>2</b> | 100.0      | Chicken MHC class I B21 $\alpha 1\alpha 2\alpha 3$          | c2yf6A   | 18                  |
| 3        | 100.0      | Chicken MHC class I B21 $\alpha 1\alpha 2\alpha 3$          | c3bewD   | 16                  |
| 4        | 100.0      | Chicken MHC class I Rfp-Y $\alpha 1\alpha 2\alpha 3$        | c3p73A   | 17                  |
| 5        | 100.0      | Mouse nonclassical class I CD1d1 $\alpha 1\alpha 2\alpha 3$ | c2akrA   | 16                  |
| 6        | 100.0      | Human nonclassical class I CD1d                             | c1zt4C   | 17                  |
| 7        | 100.0      | Human nonclassical class I CD1a $\alpha 1\alpha 2\alpha 3$  | c1xz0A   | 15                  |
| 8        | 100.0      | Nonclassical class I HFE $\alpha 1\alpha 2\alpha 3$         | c1de4A   | 16                  |
| 9        | 100.0      | Xenopus laevis MHC class I $\alpha 1\alpha 2\alpha 3$       | c6a2bA   | 17                  |
| 10       | 100.0      | Chicken nonclassical class I CD1                            | c3dbxA   | 16                  |

SWISS-MODEL allis shad (WA  $\alpha 1$  + WB  $\beta 1\beta 2$ )

| No.      | GMQE | Template information                                 | Template | Sequence Identity % |
|----------|------|------------------------------------------------------|----------|---------------------|
| <b>1</b> | 0.58 | Anolis MHC class I $\alpha 1\alpha 2\alpha 3$        | 7cpo.1.A | 18.33               |
| 2        | 0.57 | Chicken MHC class I B2 $\alpha 1\alpha 2\alpha 3$    | 4cvx.1.A | 19.69               |
| 3        | 0.57 | Cattle MHC class I $\alpha 1\alpha 2\alpha 3$        | 3pww.1.A | 17/65               |
| 4        | 0.57 | Chicken MHC class I B2 $\alpha 1\alpha 2\alpha 3$    | 4d0d.1.A | 19.69               |
| 5        | 0.57 | Bat MHC class I $\alpha 1\alpha 2\alpha 3$           | 6ilf.1.A | 17.05               |
| 6        | 0.57 | Bat MHC class I $\alpha 1\alpha 2\alpha 3$           | 6ilc.1.A | 17.05               |
| 7        | 0.56 | Cattle MHC class I $\alpha 1\alpha 2\alpha 3$        | 3pww.1.A | 17.65               |
| 8        | 0.56 | Human MHC class I HLA-B57 $\alpha 1\alpha 2\alpha 3$ | 5vvp.1.A | 17.65               |
| 9        | 0.56 | Chicken MHC class I Rfp-Y $\alpha 1\alpha 2\alpha 3$ | 3p77.1.A | 18.95               |
| 10       | 0.56 | Xenopus MHC class I $\alpha 1\alpha 2\alpha 3$       | 6a2b.1.A | 18.04               |

## 6. allis shad WA all / WB all

## SWISS-MODEL allis shad WA all / WB all

| No.      | GMQE | Template information       | Template | Sequence Identity % |
|----------|------|----------------------------|----------|---------------------|
| <b>1</b> | 0.46 | Human MHC class II HLA-DR1 | 3pdo.1   | 22.25               |
| 2        | 0.46 | Human MHC class II HLA-DR1 | 4x5w.1   | 22.25               |
| 3        | 0.46 | Human MHC class II HLA-DQ  | 4may.1   | 22.93               |
| 4        | 0.46 | Mouse MHC class II H2-I-EK | 1fne.1   | 23.08               |
| 5        | 0.46 | Human MHC class II HLA-DQA | 6dig.1   | 22.99               |
| 6        | 0.46 | Human MHC class II HLA-DQ1 | 3pl6.1   | 22.93               |
| 7        | 0.46 | Human MHC class II HLA-DQ  | 1uvq.1   | 23.06               |
| 8        | 0.46 | Mouse MHC class II H2-E    | 1kt2.1   | 23.64               |
| 9        | 0.46 | Mouse MHC class II H2-I-Au | 2p24.1   | 20.72               |
| 10       | 0.46 | Human MHC class II HLA-DR  | 2wbj.1   | 22.31               |

7. allis shad (WA  $\alpha$ 1 + WB  $\beta$ 1 $\beta$ 2) / WA  $\alpha$ 2SWISS-MODEL allis shad (WA  $\alpha$ 1 + WB  $\beta$ 1 $\beta$ 2) / WA  $\alpha$ 2

| No.       | GMQE | Template information      | Template | Sequence Identity % |
|-----------|------|---------------------------|----------|---------------------|
| <b>1</b>  | 0.66 | Chicken MHC class I BF2   | 6lhf.1   | 25.15               |
| 2         | 0.66 | Chicken MHC class I BF2   | 6lhg.1   | 23.98               |
| 3         | 0.65 | Duck MHC class I          | 6kyu.1   | 23.17               |
| 4         | 0.65 | Duck MHC class I          | 5gjjx.1  | 24.12               |
| 5         | 0.65 | Chicken MHC class I B2    | 4cvx.1   | 25.07               |
| 6         | 0.65 | Chicken MHC class I B21   | 4cvz.1   | 25.22               |
| 7         | 0.65 | Anolis MHC class I        | 7cpo.1   | 23.62               |
| 8         | 0.64 | Bat MHC class I           | 6ilc.1   | 24.36               |
| 9         | 0.64 | Anolis MHC class I        | 7cpo.1   | 23.82               |
| <b>10</b> | 0.64 | Human MHC class I HLA-B57 | 3wuw.1   | 23.92               |

Representative results of the 3D modeling in the Phyre2 analyses

1. allis shad WA  $\alpha$ 1

Phyre2 Rank 10 template c7edoA Marsupial class1  $\alpha$ 1

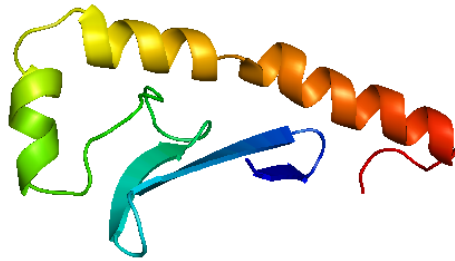

2. allis shad WA  $\alpha$ 2

Phyre2 Rank 2 template c4aenA Human MHC class II HLA-DR  $\alpha$ 2

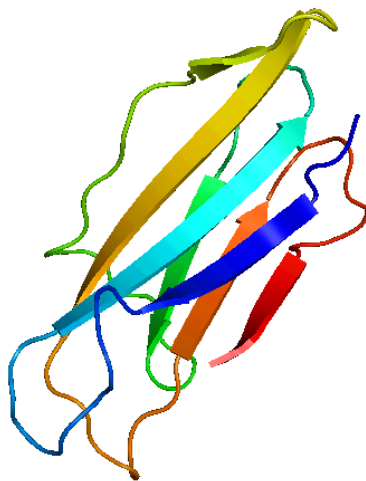

3. allis shad WA all

Phyre2 Rank 1 template c6kvmA Chicken MHC class II  $\alpha 1\alpha 2$

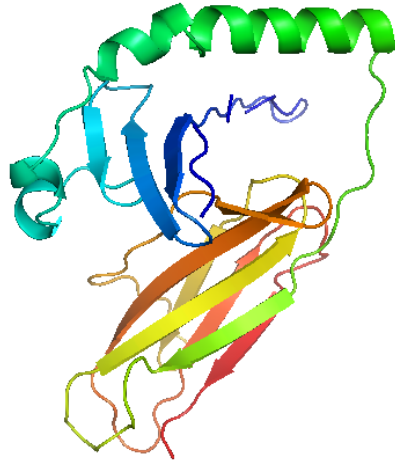

4. allis shad WB all

Phyre2 Rank 1 template c2yf6A Chicken MHC class1  $\alpha 2\alpha 3$

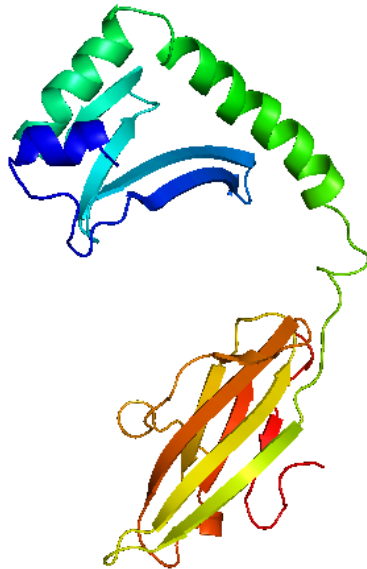

5. allis shad (WA  $\alpha$ 1 + WB  $\beta$ 1 $\beta$ 2)

Phyre2 Rank 2 template c2yf6A Chicken MHC class1  $\alpha$ 1 $\alpha$ 2 $\alpha$ 3

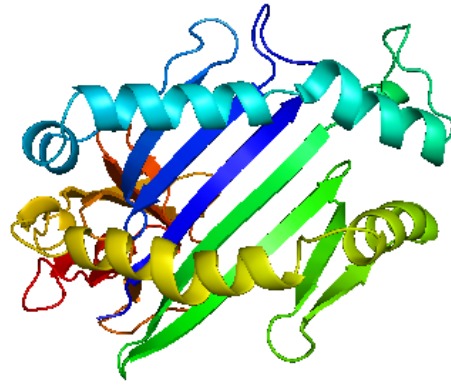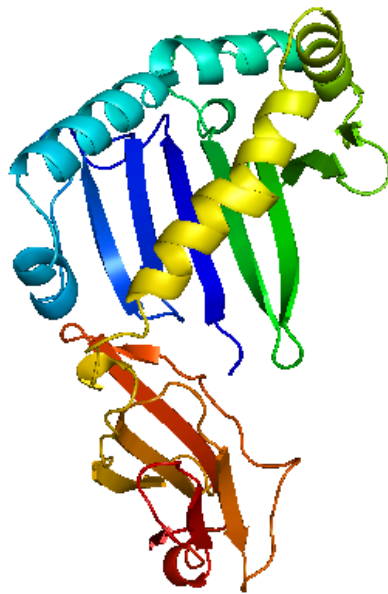

## Representative results of the alignments in the Phyre2 analyses

### 1. allis shad WA $\alpha 1$

Phyre2 Rank 10 template c7edoA Marsupial class I  $\alpha 1$

10 c7edoA\_ Probab=8.56 E-value=3.8e+02 Score=13.42 Aligned\_columns=82 Identities=17%

```
Q ss_pred      EEEEECCCC-C-EEEEEEEEHHHHHHHHCCCEEECHHHHHHHHH-HHHHHHHHH
Q ss_conf      654204786-2-104887871167764430054575540212235877-42114141798
Q allis_shad_WA_ 10 YTRLTSRDS-V-EQGVLLVNEAVFAYFNATEKTFLLRPTAMAGFVSL-EAKERMYCVSE 66 (92)
Q Consensus    10 ytr~~~~~s-i~q~v~vlvn~aifa~f~~~~~tf~l~pta~agfsvl-e~~e~~c~~e 66 (92)
               ||-+.+.++ . +-.+++ |+|-|. +||...+++..|.+.---.++ |..+.=...+
T Consensus    9 ~T~s~~~~g~p~f~~v~~vDd~~~~Yds~~~~r~~p~~W~~~~~we~~t~ 68 (278)
T c7edoA_      9 YTAVSGPELREPRFLSVGYVDEQQFVRFDSASESPREEPRAKWIERVGEEDPEYWERQTG 68 (278)
T ss_dssp      EEEEECCSSCSCEEEEEEEETEEEEEEETSSSCCEECSSGGGGGGGGSTTHHHHHH
T ss_pred      EEEEECCCCCCEEEEEEECEEEEEEECCCEEECHHHHHHHCCCHHHHHHH
T ss_conf      999816789884599999998999827875423420404554310368278999999
```

```
Q ss_pred      HHCCCCCH-HHHHHHHHHHCCCC
Q ss_conf      74105012-79999999631257889
Q allis_shad_WA_ 67 VINAFPRQ-QDYLDKLIKQTNGAKPP 91 (92)
Q Consensus    67 v~~~f~r~q~~~y|~k|~k~t~~kpp 91 (92)
               ..+.+.+. ++.+.+.+. |.++.+
T Consensus    69 ~~~~~~|~~~~~n~s~~g 94 (278)
T c7edoA_      69 ILRRNTQVFRVGLLETLRGYFNQSAGG 94 (278)
T ss_dssp      HHHHHHHHHHHHHHHHTTCCTC
T ss_pred      HHHHHHHHHHHHHHHHCCCC
T ss_conf      9988999999999999860478776
```

### 2. allis shad WA $\alpha 2$

Phyre2 Rank 2 template c4aenA Human MHC class II HLA-DR  $\alpha 2$

2 c4aenA\_ Probab=99.93 E-value=5.1e-25 Score=163.41 Aligned\_columns=94 Identities=31%

```
Q ss_pred      CCCCCCECCCECCCEEEEEEECCCEEECECCCEEECECCCEEECECCCE
Q ss_conf      965899805674336984899999767798531688627737277635788648970
Q allis_shad_WA_ 1 LSPSVNYVSHFPAMPGSPNYLYCYATGFYPGDIEISFVLNRPFPPTESDLVYGEDWT 60 (94)
Q Consensus    1 V~P~v~v~g~tL~a~g~P~v~W~g~|~~~~~ 60 (94)
               |++|++|+++ ++. |+.++|+. |. |||+.++|++|+++..++..+.++++|+
T Consensus    83 ~pP~v~v~L~C~a~gFyP~i~v~W~ng~~~~~DgT 142 (178)
T c4aenA_      83 VPPEVTVLTNSPVLEPNVLIQIDKFTPPVNVNVTWLRNGKPVTTGVSETVFLPREDHL 142 (178)
T ss_dssp      BCCCCCEESSCCTTSCCEEEEEEEEBSSCCEEEETTECCSSCECCCECTTSC
T ss_pred      CCCCCCECCCEEECEEECEEECEEECEEECEEECEEECEEECEEECEEE
T ss_conf      786128971585656773589999913007835999987681044774002016438960
```

```
Q ss_pred      EEEEEEECCCEEEEEECCCEEECEEE
Q ss_conf      6799999995232788999999087888679739
Q allis_shad_WA_ 61 FRVKYISILPLPGEVYECFVNHSSLAQPKITVW 94 (94)
Q Consensus    61 ~~~s~l~v~d~ytC~V~H~l~p~ 94 (94)
               |++.+.|.+.++++. |++|++|++|. +|++++|
T Consensus    143 f~~~s~L~v~p~ytC~V~H~sL~p~w 176 (178)
T c4aenA_      143 FRKFHYLPFLPSTEDVYDCRVEHWGLDEPLLKH 176 (178)
T ss_dssp      EEEEEEECCSSCCEEEETSSSCEEEEE
T ss_pred      EEEEEEECCCEEEEEECEEECEEE
T ss_conf      9999999994899887999999077889767873
```

3. allis shad WA all  
Phyre2 Rank 1 template c6kvmA Chicken MHC class II  $\alpha 1\alpha 2$

1 c6kvmA\_Probab=100.00 E-value=0 Score=308.98 Aligned\_columns=180 Identities=19%

```
Q ss_pred          EEEEE-EEEEECCCCCEEEEEEECEEEEEEECCCEEEEECCGCCCEEECCGCC
Q ss_conf          044466-67665169982307999983705999984797599712566541000001231
Q allis_shad_WA_  26 EAVSIL-AYTRLTSRDSVEQGLVLVNEAVFAYFNATEKTFLLRPTAMAGFSVLEAKERM   84 (251)
Q Consensus       26 h~c~gs~d~f~fd~p~a~
      |+++ . ++|+. . |+. . . |. ++++||+||+||+|++|++|++|+
T Consensus       4 h~f~gp~G~gyDGee~D~v~p~
T c6kvmA_         4 HVLQAEFYQRSEGPDKAWAQFGHFDADLFHVELDAAQTV-----WRLPEFGRFASF   57 (184)
T ss_dssp         CCCEEEEEEEEETTTTTEEEEEEEEEETEEEEECTTSCCEE-----ESSGGGGGTC
T ss_pred         CEEEEEEEEEECCCCCEEEEEEECCCEEEEEEECCCEEE-----EECCCCCHHH
T ss_conf         25888998775068877621568886706999982575587-----307532212233
```

```
Q ss_pred          HHHHHHHHHHHHHHHHHHHHHHHCCGCCGCCCEEEEECCGCCGCCCEEEEEEECEE
Q ss_conf          023321011233578999999740123344379648999538877887049999993303
Q allis_shad_WA_  85 YCVSEVINAFFRQQDYLDKLIKQTNQAKPPKLSPSVNVYSHFPAMPGSPNLYCYATGFY   144 (251)
Q Consensus       85 ~~~~~~L~~~~~v~P~V~p~g~L~C~v~gFY   144 (251)
      +|+ . . . . +|+ . |+++++ . ++++++|+| . |+++++ . |++++|+|+|
T Consensus       58 ~~~~~-|~c~L~|~~~~~pP~V~v~tL~C~a~gFy   116 (184)
T c6kvmA_         58 EAQALQN-MAVGKQNLVMI SNSNRSQQDFVTPELALFPAEAVSLEEPNVLICYADKFW   116 (184)
T ss_dssp         CGGGHHHH-HHHHHHHHHHHHTTSCCCCBCEEEEEESSCCCTTCCEEEEEEEEB
T ss_pred         HHCCCHHH-HHHHHHHHHHHHCCGCCGCCCEEEEEEECCGCCGCCCEEEEEEECC
T ss_conf         31001688-99879999999724532112575169998158776677438999992401
```

```
Q ss_pred          CCCEEEEEEECCCECCCECECECECECECECECECECECECECECECECECECC
Q ss_conf          674399999998981266200201532997199999998089988999993667886
Q allis_shad_WA_  145 PGDIEISFVLNRPFPGPTESSDLVYGEDWTRFVKYISILPLPGEVYECFVNHSSLAQP   204 (251)
Q Consensus       145 P~I~vtW~knG~v~s~pn~DgTyq~s~L~v~p~YtC~V~H~sL~p   204 (251)
      |++|+|+|+|+|+++++ . +++++|+|+|+|+|+|+|+|+|+|+|+|+|
T Consensus       117 P~I~v~ng~pn~Dgtf~s~L~p~ytC~V~H~sL~p   176 (184)
T c6kvmA_         117 PPVATMEWRRNGAVVSEGVDYVYGRPDLLFRKFSYLPFVQQRGDVYSCAVRHWGAEGP   176 (184)
T ss_dssp         SSCCEEEEEETTEEECTTCCECCCECGGGCEEEEEEECCCTTCCEEEEEETSSSC
T ss_pred         CCCEEEEEEECCCECCGCCCEEECCCEEEEEEEEECCGCCCEEEEEEECCGCC
T ss_conf         68269999978832236631142165399609999999818868879999990678887
```

```
Q ss_pred          EEEEECC
Q ss_conf          68997236
Q allis_shad_WA_  205 KITVWRPE   212 (251)
Q Consensus       205 ~~~~W~p~   212 (251)
      +++ . |++|+
T Consensus       177 ~~~~W~pe   184 (184)
T c6kvmA_         177 VQRMWEPE   184 (184)
T ss_dssp         EEEEECC
T ss_pred         EEEEEEC
T ss_conf         58997229
```







Representative results of the 3D modeling in the SWISS-MODEL analyses

1. allis shad WA  $\alpha$ 1

SWISS-MODEL No. 1 template 6blr.1.A Mouse MHC class II IA  $\alpha$ 1

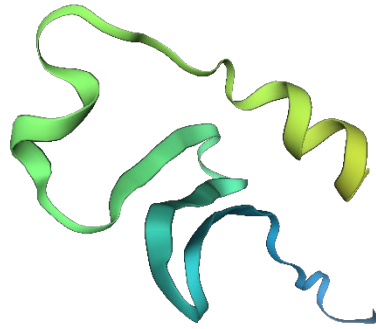

2. allis shad WA  $\alpha$ 2

SWISS-MODEL No. 1 template 2qri.2.A Mouse MHC class I H-2 Kb  $\beta$ <sub>2</sub>-m

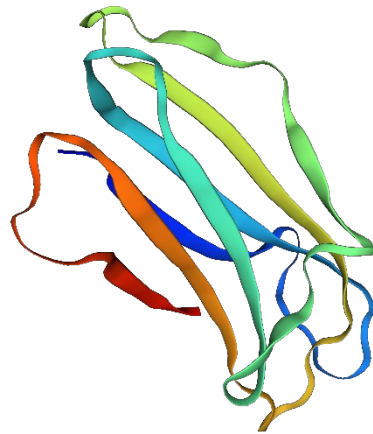

3. allis shad WA all

SWISS-MODEL No.1 template 1aqd.1.B Human MHC class II HLA-DR1

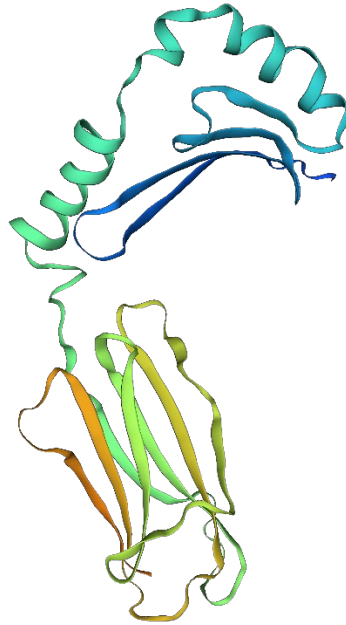

SWISS-MODEL No.6 template 6h6d.1.A Mouse MHC class I H-2 D-B

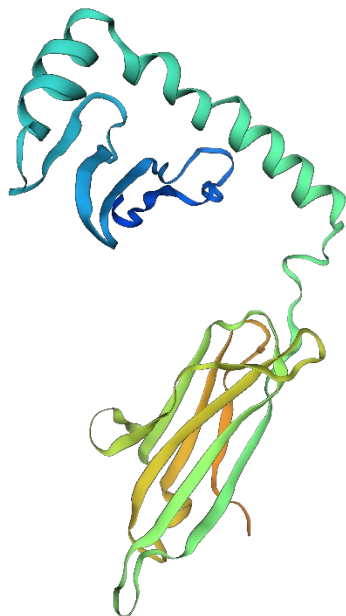

4. allis shad WB all

SWISS-MODEL No. 1 template 3p77.1.A Chicken MHC class I Rfp-Y  $\alpha 2\alpha 3$

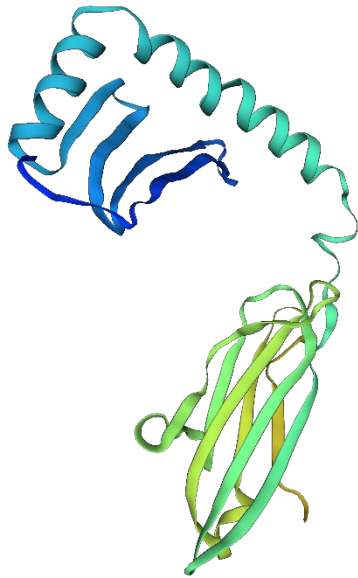

5. allis shad (WA  $\alpha 1$  + WB  $\beta 1\beta 2$ )

SWISS-MODEL No. 1 template 7cpo.1.A Anolis MHC class I  $\alpha 1\alpha 2\alpha 3$

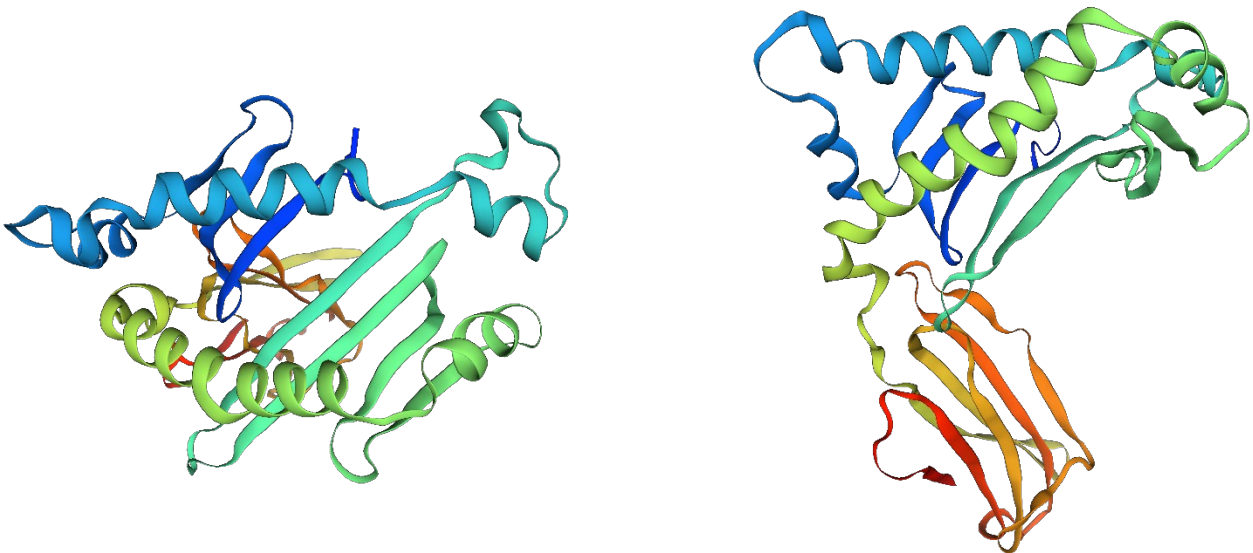

## 6. allis shad WA / WB

SWISS-MODEL No. 1 template 3pdo.1 Human MHC class I HLA-DR1 (class II-type model)

Within the first half of the  $\alpha$ -helix of the WA  $\alpha$ 1 domain is not formed well.  
The template MHC class II molecules generally possess deletions of residues at the corresponding region (Fig. S21).

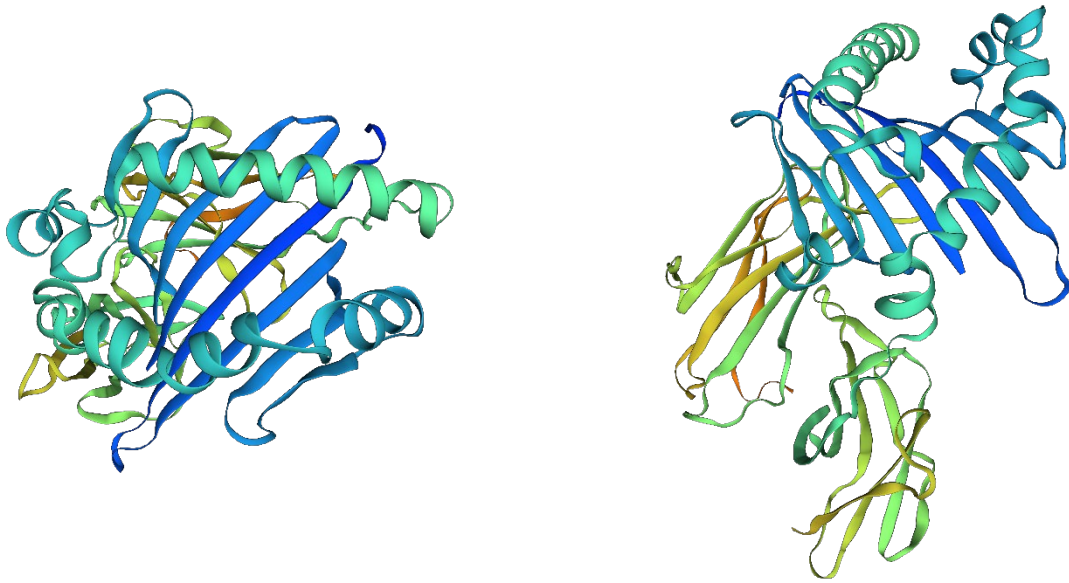

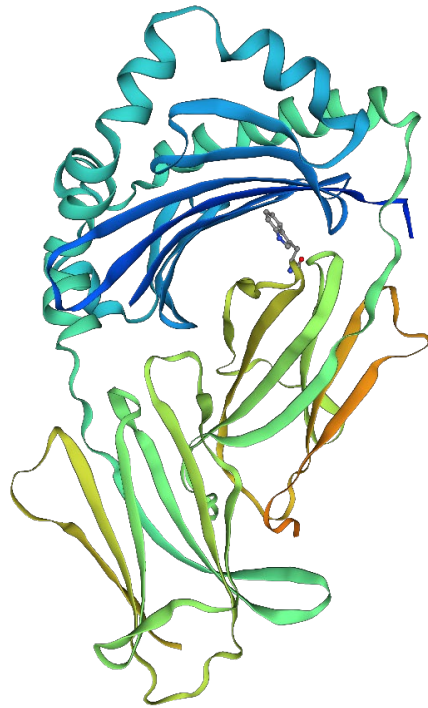

WA  $\alpha$ 2 W61

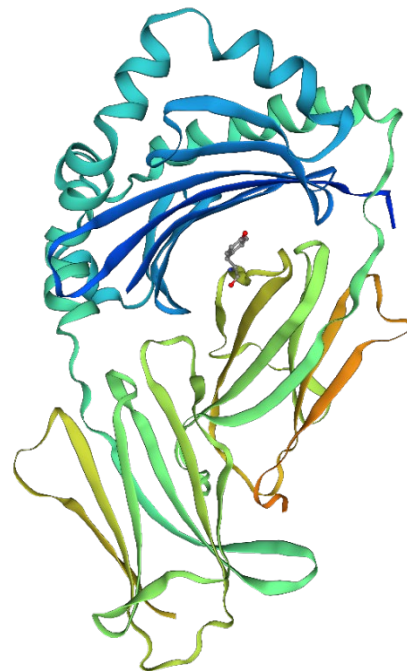

WA  $\alpha$ 2 Y57

SWISS-MODEL No. 1 template 3pdo.1 Human MHC class I HLA-DR1 (class II-type model)

showing Tryptophan (W)-61 and Tyrosine (Y)-57 of WA  $\alpha$ 2 domain in the model together with glutamine (Q)-6 and aspartic acid (D)-37 of WB  $\beta$ 1 domain.

$\beta$ <sub>2</sub>-m possesses conserved phenylalanine (F)-57 instead of tyrosine.

$\beta$ <sub>2</sub>-m W61 interacts with Q6 and D37 of the class I  $\alpha$ 2 domain through hydrogen-bonding.

$\beta$ <sub>2</sub>-m F57 also interacts with Q6 of the class I  $\alpha$ 2 domain.

Even in the model of the class II-type molecule composed of WA  $\alpha$  chain (WA  $\alpha$ 1 $\alpha$ 2) and WB  $\beta$  chain (WB  $\beta$ 1 $\beta$ 2), WB  $\beta$ 1 Q6 and WB  $\beta$ 1 D37 are situated close to WA  $\alpha$ 2 W61.

Oxygen: light red

Nitrogen: blue

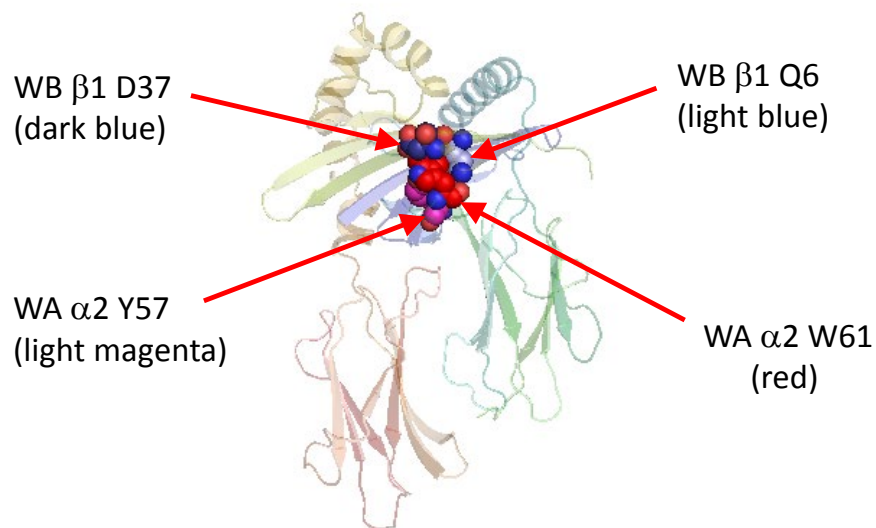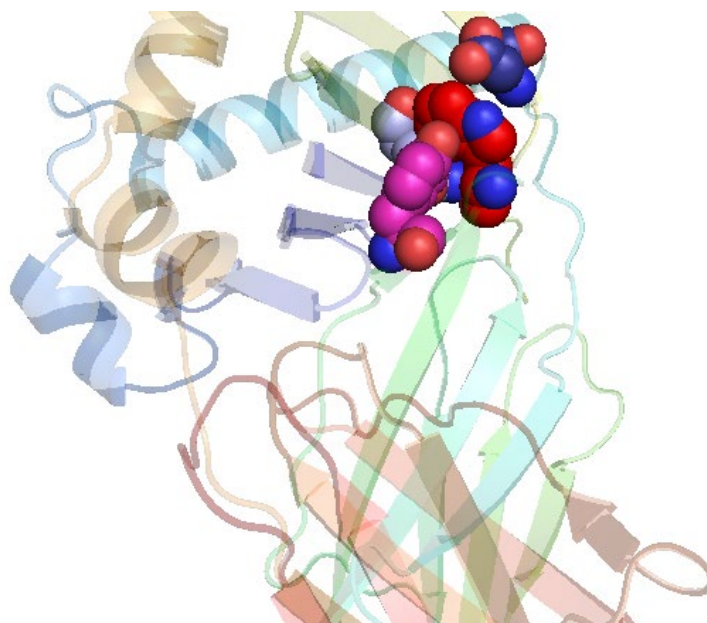

The nitrogen of WA $\alpha$ 2 W61 is not so close to the oxygen of WB  $\beta$ 1 D37.

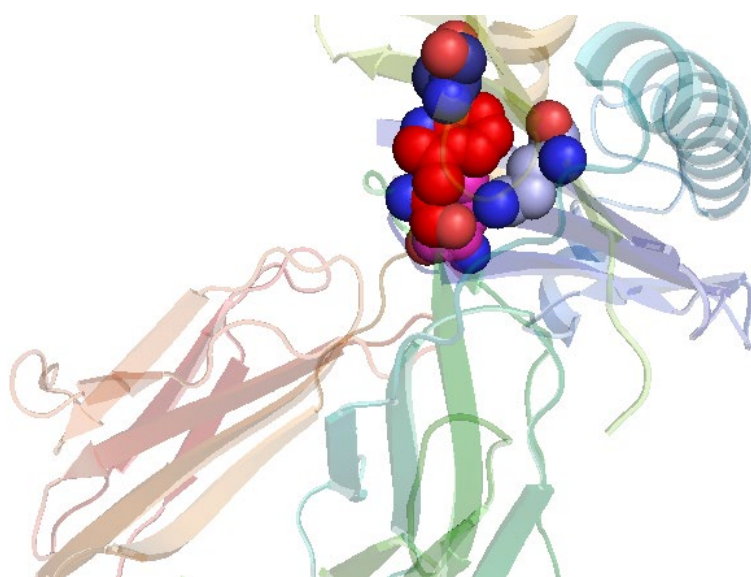

The oxygen of main chain of WA $\alpha$ 2 W61 is very close to the nitrogen of WB  $\beta$ 1 Q6.

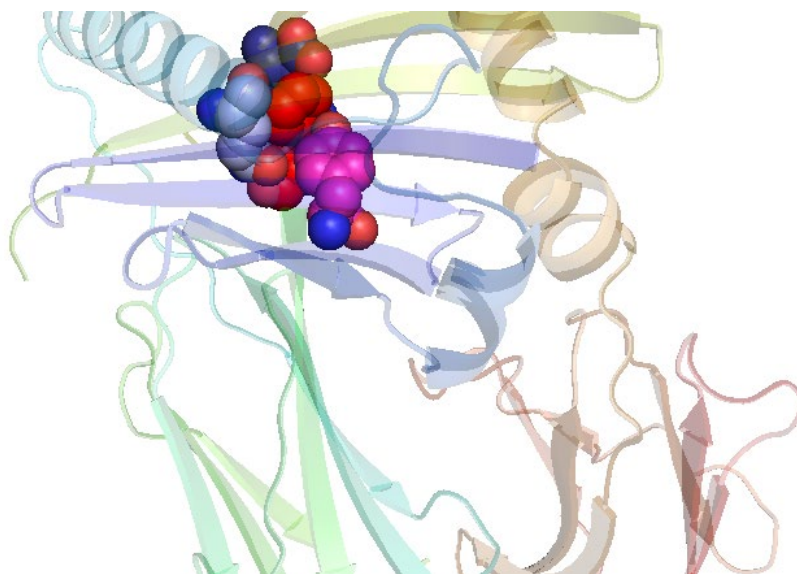

WA $\alpha$ 2 Y57 and WB  $\beta$ 1 Q6.



SWISS-MODEL No. 1 template 3pdo.1 Human MHC class I HLA-DR1 (class II-type model)

In  $\alpha 3/\beta 2$ -m interface of MHC class I molecule, the oxygen of main chain of  $\alpha 3$ P57 and the hydroxy group of  $\beta 2$ -m Y8 form the conserved hydrogen bond.

In this model of W-category molecule, the oxygen of main chain of WB $\beta 2$  P57 and the hydroxy group of WA $\alpha 2$  Y8 are distantly located.

Oxygen: light red, Nitrogen: blue

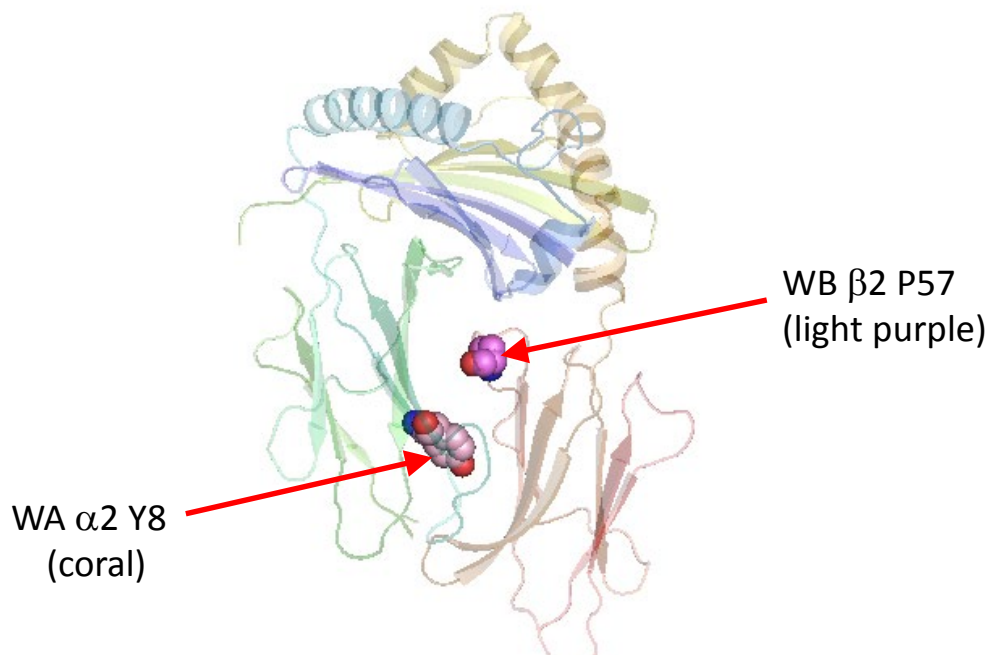

7. allis shad (WA  $\alpha$ 1 + WB  $\beta$ 1 $\beta$ 2) / WA  $\alpha$ 2

SWISS-MODEL No. 1 template 6lhf.1 Chicken MHC class I BF2 (class I-type model)

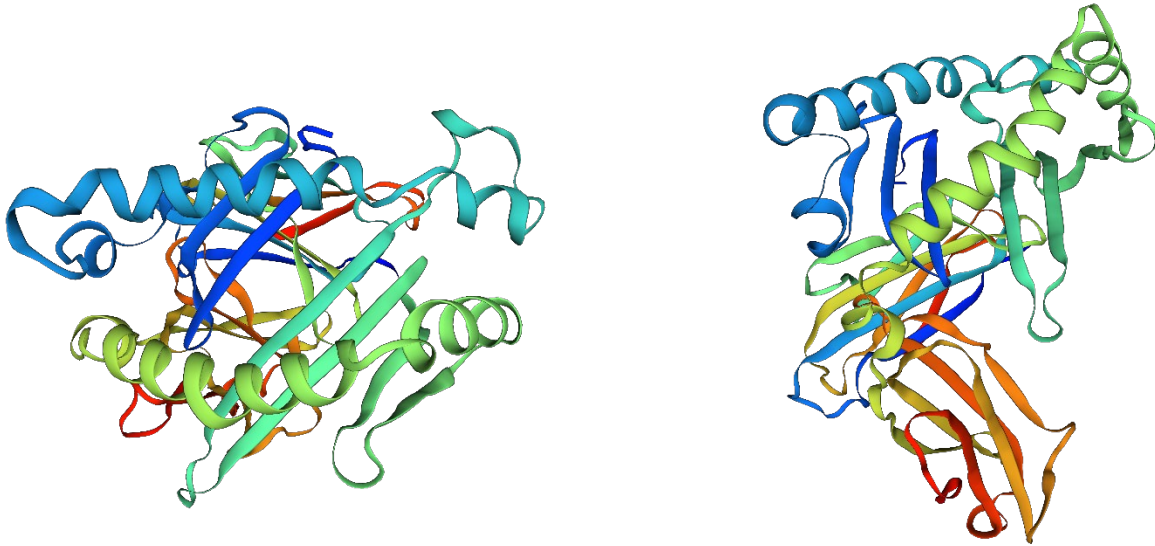

SWISS-MODEL No. 10 template 3wuw.1 Human MHC class I HLA-B57 (class I-type model)

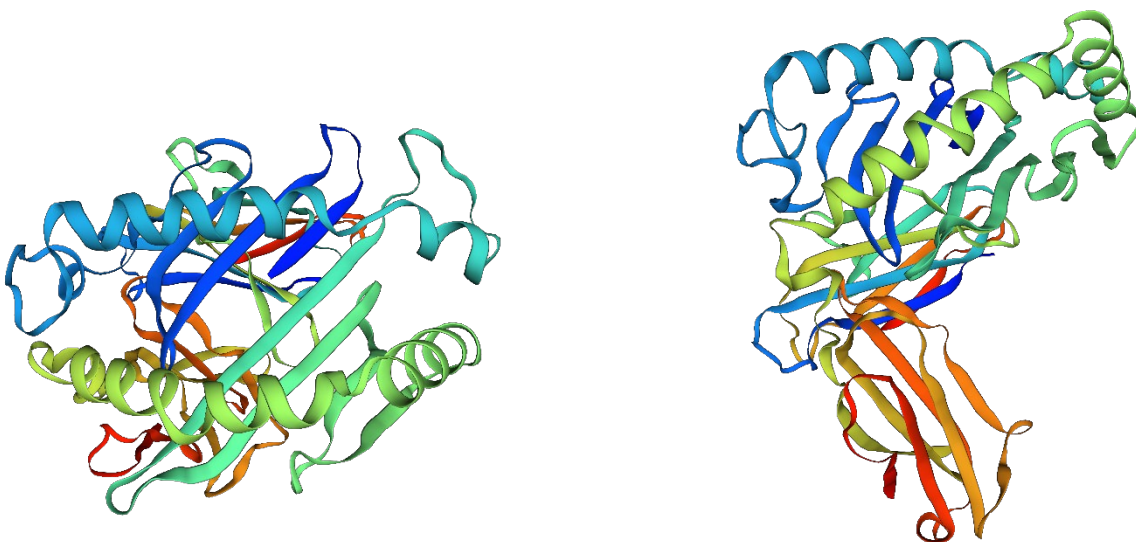

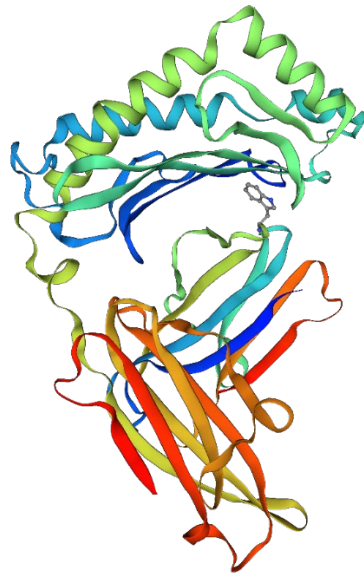

WA  $\alpha$ 2 W61

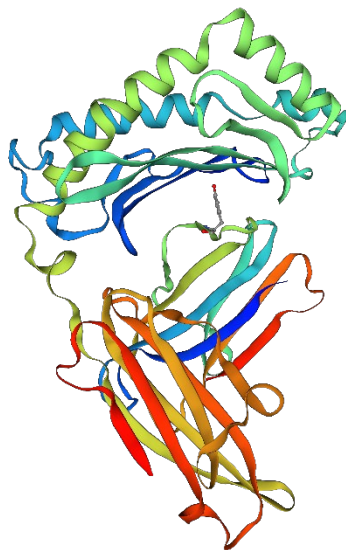

WA  $\alpha$ 2 Y57

SWISS-MODEL No. 10 template 3wuw.1 Human MHC class I HLA-B57 (class I-type model)

showing Tryptophan (W)-61 and Tyrosine (Y)-57 of WA  $\alpha$ 2 domain in the model together with glutamine (Q)-6 and aspartic acid (D)-37 of WB  $\beta$ 1 domain.

$\beta_2$ -m possesses conserved phenylalanine (F)-57 instead of tyrosine.

$\beta_2$ -m W61 interacts with Q6 and D37 of the class I  $\alpha$ 2 domain through hydrogen-bonding.

$\beta_2$ -m F57 also interacts with Q6 of the class I  $\alpha$ 2 domain.

Oxygen: light red, Nitrogen: blue

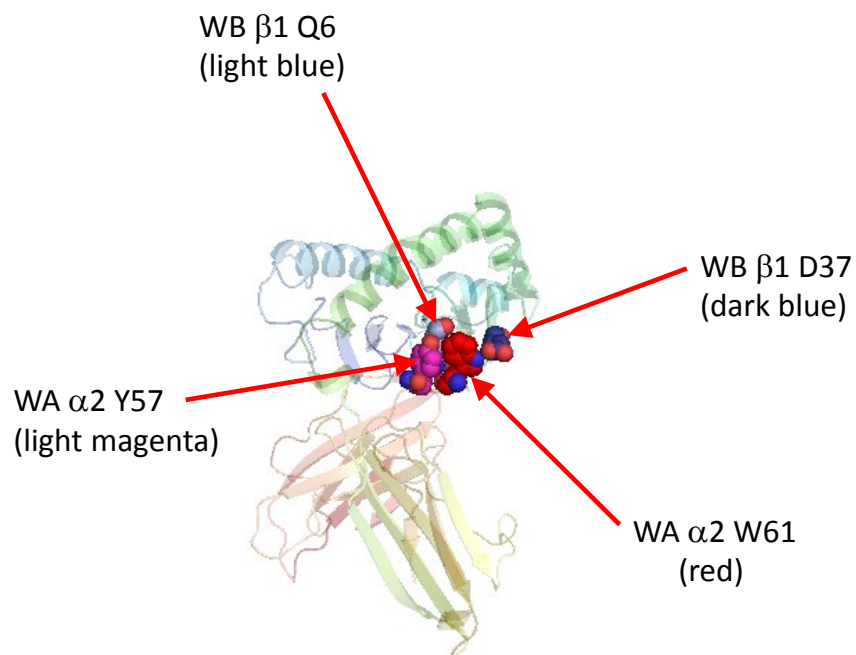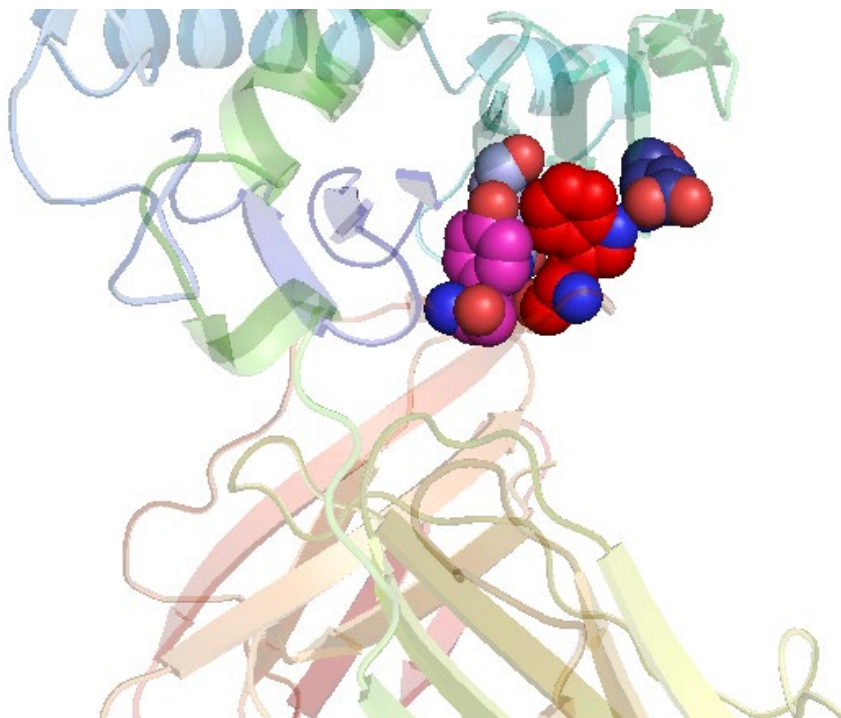

The nitrogen of WA $\alpha$ 2 W61 is very close to the oxygen of WB  $\beta$ 1 D37.

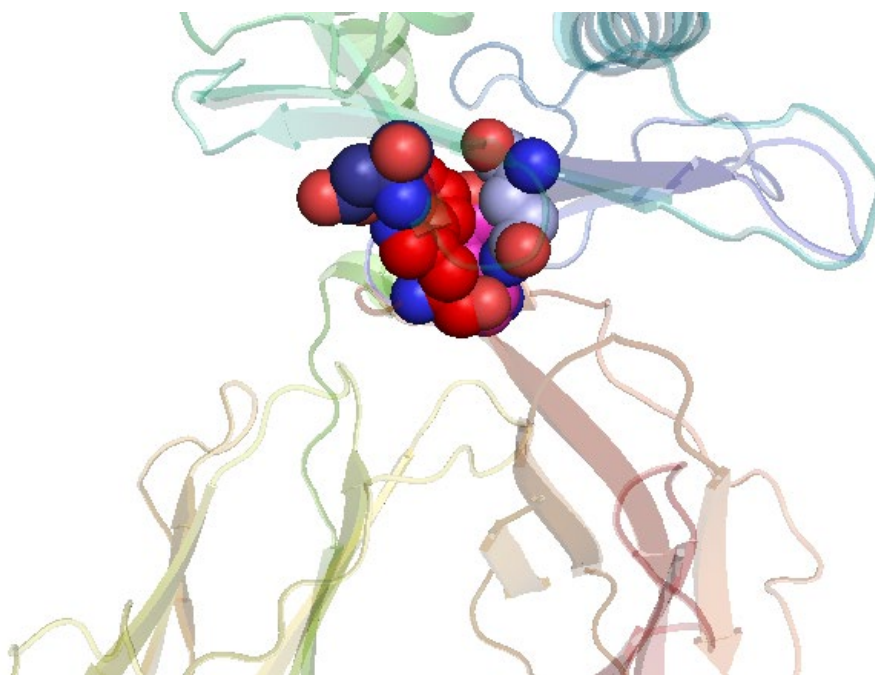

The oxygen of main chain of WA $\alpha$ 2 W61 is very close to the nitrogen of WB  $\beta$ 1 Q6.

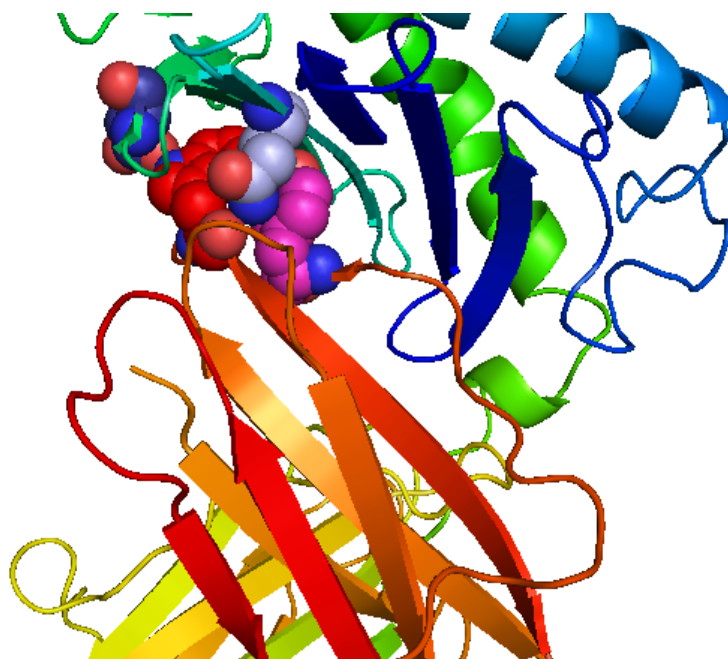

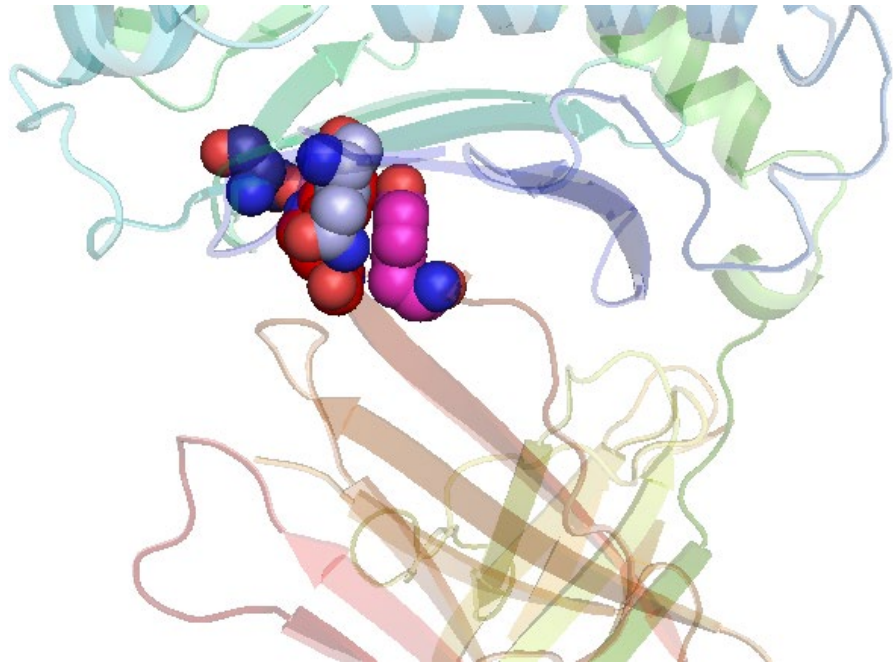

WA $\alpha$ 2 Y57 is also close to WB  $\beta$ 1 Q6.

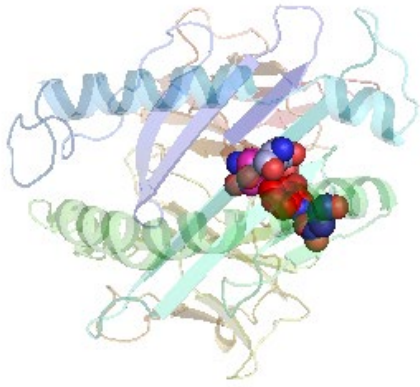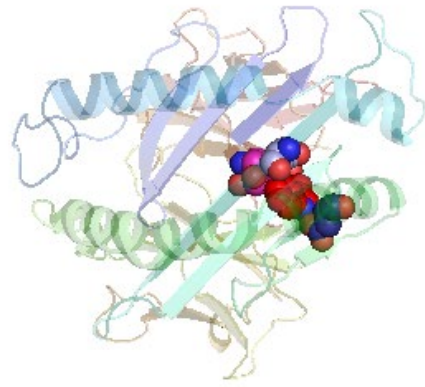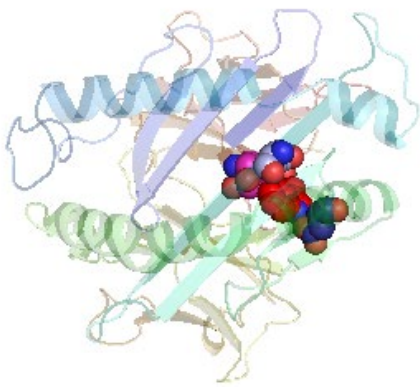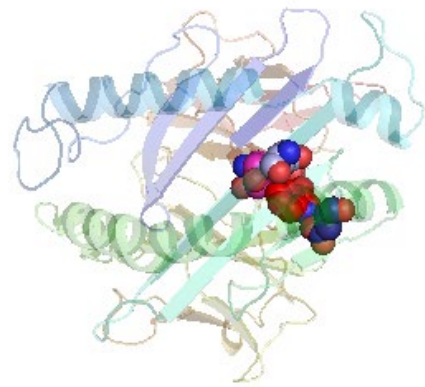

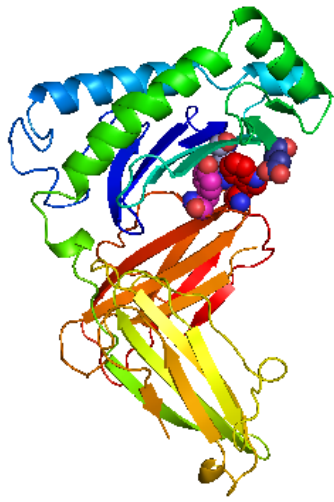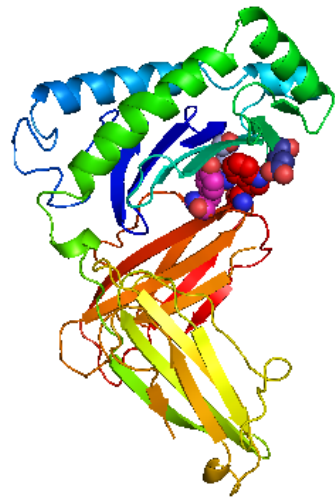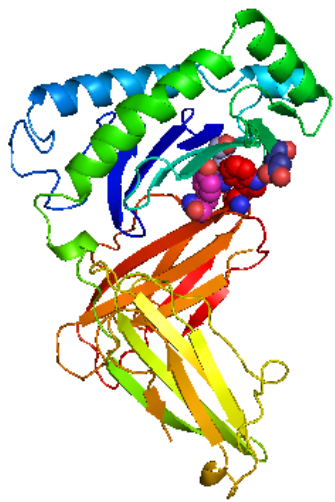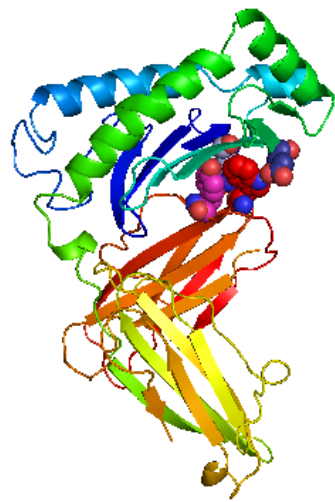



SWISS-MODEL No. 10 template 3wuw.1 Human MHC class I HLA-B57 (class I-type model)

In  $\alpha 3/\beta 2$ -m interface of MHC class I molecule, the oxygen of main chain of  $\alpha 3$ P57 and the hydroxy group of  $\beta 2$ -m Y8 form the conserved hydrogen bond.

In this model of W-category molecule, the oxygen of main chain of WB $\beta$ 2 P57 and the hydroxy group of WA $\alpha$ 2 Y8 are very close to each other.

Oxygen: light red, Nitrogen: blue

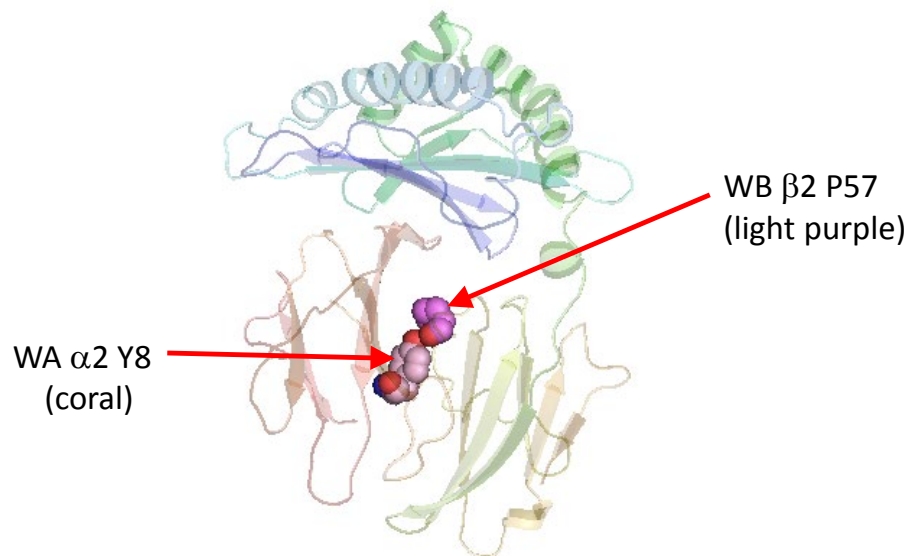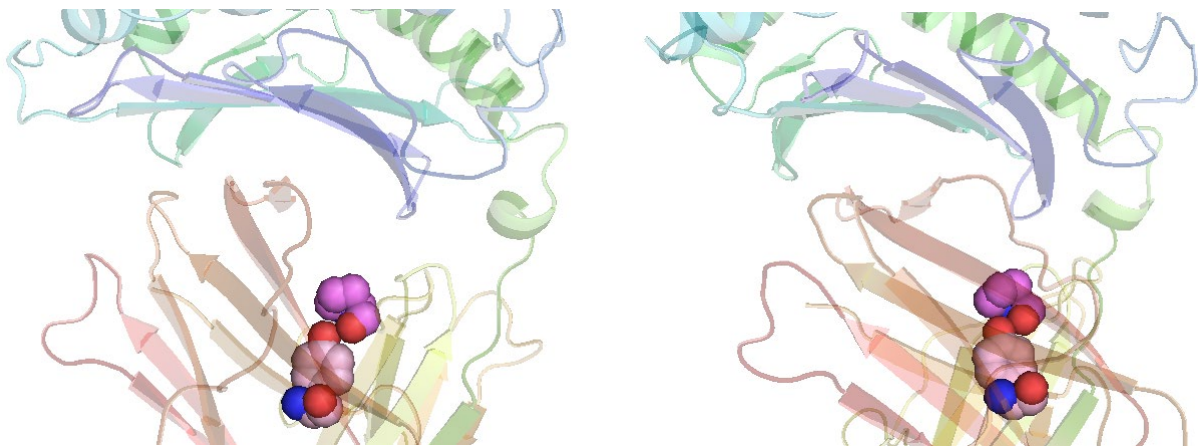

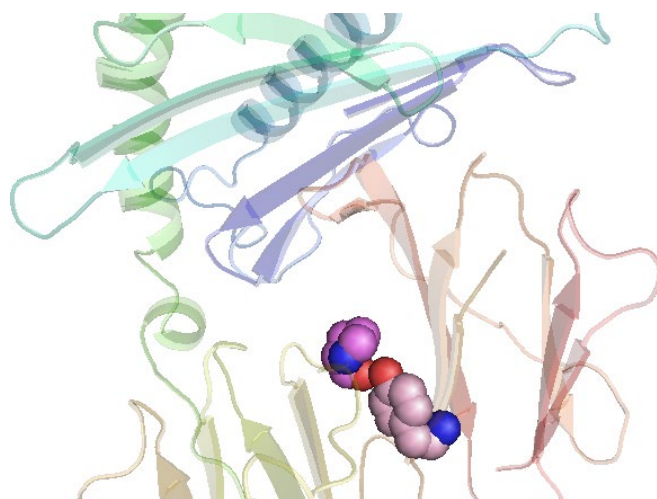



SWISS-MODEL No.6 template 6h6d.1.A Mouse MHC class I H-2 D-B  $\alpha 2\alpha 3$

```

Model_09 MGSILALHLLVLLLFQSNMAWTDYEAV-SIAYTRLTSRD-SVEQGVLVLYNEAVFAYENATEKTEFLRPTAMAGFSVL 78
6h6d.1.A -----GGSHFLQOMSGCDIISDWFLLRGYLOFAEGRDYFAINEDLKTHTADMAA-QITRR 145
Model_09 EAKERMYCVSEVI-NAFPRQDDYLDKLIKQTNKAKPPKSPFVNVVYSFPAMPGSPNYLYCVATGFVPGDIETISFVINGE 157
6h6d.1.A -KWEQSGAAEHYKAYLDGCVVEWLHRYLKGNAATLLRTPSPKAHVTHH--SKGEVTLRCWALGFVPAIDITLTWQINGE 222
Model_09 EPPGPTESSDLVVYGEDWTFRVEFKYISDLPIEGEVYECFVNPSLSLAQPKITVWRPEVSKTIGASVWLTAVVAAACGGALGC 237
6h6d.1.A DLTQDMETVETBRAGDGTFOKNASVVVVLGKEQNYTCVYHEGLPEPLTTRWEPPTSDSYMVIVAVLGVLG-AMATIGA 301
Model_09 FMSVFVWRQRNVTK 251
6h6d.1.A VVAFFVMKRRRNT-- 313
    
```

4. allis shad WB all

SWISS-MODEL No. 1 template 3p77.1.A Chicken MHC class I Rfp-Y  $\alpha 2\alpha 3$

```

Model_01 MIIQLCAIILGLSSINA-RDEFTYQQYIGCAENRQGFVGRFWRVYGNPKDIMQVDLKNFAVVVWSDEGNFMAEERQSK-M 78
3p77.1.A -----YNKSKGSHTMQMMVEGCDIEDGIERGYDOYLPDGRDELAEDMDTMTFTPADPVAEITKRRWETSGL 150
Model_01 EFKDKKEYKLMRICALVAVNIVFDQ-SNNSLSKDKKPTVRVLSLEEGKEYIMCSVOGESPNNTISVRWVXKGIWHFARTDTG 157
3p77.1.A YAEERWKHELGTVCVQNLRRYLEGKAALRRRTPPEVRVNGHEGLTLLSCHAHGEPRPIFISWVGGIQQEITLGG 230
Model_01 LLPRKDGTFQITSYLTLGNKTLQDIVCETPHISIEGTLQATLDDKYSMGIIVGVGILSFFLAACLTVPVGVTAFIGSCMKRRR 237
3p77.1.A LTPNSDGTVHASAATIDPEDGDKVWCRVPHASLPPQPLPNEP----- 274
Model_01 QSSLNDSLEQSSDNSVNPASVSLMDIEPQADQDPVA 273
3p77.1.A ----- 273
    
```

5. allis shad (WA  $\alpha 1$  + WB  $\beta 1\beta 2$ )

SWISS-MODEL No. 2 template 7cpo.1.A Anolis MHC class I  $\alpha 1\alpha 2\alpha 3$

```

Model_04 DVEAVSILAYTRLTSRDSVEQGVLVLYNEAVFAYENATEKTEFLRPTAMAGSVVLEAKERMVCVSEVINAFPRQDDY--- 77
7cpo.1.A -----QQVQFQSYVGVYDQEFVSYASTRIVLQVWISKVBK---NDPITWERNTLYAQGHERSERDH 80
Model_04 LDKLIKQTNKAKPKDEFTYQQYIGCAENRQGFVGRFWRVYGNPKDIMQVDLKNFAVVVWSDEGNFMAEERQSK-KVYFKD 156
7cpo.1.A LNTLAEVYNQS---GGLHFTQMMYGCERNDSWVKGSYVQYAGRDYISLKDITLQWADPVAQNTKRRWDADGRDNEY 157
Model_04 KEYKLMRICALVAVNIVFDQ-SNNSLSKDKKPTVRVLSLEEGKEYIMCSVOGESPNNTISVRWVXKGIWHFARTDTGLL 234
7cpo.1.A KKTYLEETCIEWLQRYLNY-(KETL)LRTPPEVRVNGHEGLTLLSCHAHGEPRPIFISWVGGIQQEITLGG 237
Model_04 RKDGT FQITSYLTLGNKTLQDIVCETPHISIEGTLQATL 273
7cpo.1.A NSDGT VYVTRSVKDPKEQREYKCRVPHDGLPNEVDA-- 275
    
```

6. allis shad WA / WB

SWISS-MODEL No. 2 template 3pdo.1 Human MHC class II HLA-DR1

```

Model_01 MGSILALHLLVLLLQFSQNMAWTDYEAVSILAYTRLTSRDSVEQGVLVLVNEAVFAYEATEKTFLLRPTAMAGFSVLEA 80
3pdo.1.A -----HVLIQAPFYLPDQSGEFMEDDGDDEIPHYMAKKEITVRLLEEGGF----- 54
Model_01 KERMYCVSEVINAFPRQQDYLDKLIKQTNGAKPPKSPSVNVVYSHFPAMPGSPNYLYCYATGEPGDI EISFVINGRDFP 160
3pdo.1.A EAS----QGALANIAVDKANLEIMTKRSNYTPITNPPPEVIVLNSPVELREPNVLCRIDEFPEVVVNTWLNKRPIT 130
Model_01 GPTESDDLVDGEDWTFRVEFKYISDLPLPGEVYECFVHSSLAQPKITVDRPEVSKTIGASVWLTAVVAAACGGALGCFMS 240
3pdo.1.A TGVSPIVEPREDHI FRMFHYLPSTEDVYDCRVHWGLDEFLKHWEDAP----- 184
Model_01 VFWVRQRNVTK 251
3pdo.1.A -----

Model_01 MITQLCAILLGLSSLNARDEFTYQQYIGCAPNRQGPVGRFWRVYGPNTKDIMOVDLKNEAVVAVSDEGNFMAEERQS-KV 78
3pdo.1.B -----TRRPFILWQLKFECHFNGTEVRVILIERCTNQEEVRESDVGEVAVTGLGRPD AEYWNSSCKD 67
Model_01 YFKDKKEYKLMRICALVNTVFLQSNNSLSKDKKPTVRSLEES---EGKEYIMCSVOGEPNTISVRHWVXGKIVHFARTD 155
3pdo.1.B LLEQRRAAVDTVCRHNYGV--ESDTVQRREPKVIVVEXKTPQLQHHNLLVCSVSGEPGSI EVRWVNGQPKAGVIV 145
Model_01 TGLLDRKDKGTFOQITSYLLGNKTLQDIVCETEPI SIEGTLOATDDKYSMGILVGVGILSPFLACLTPVGVTA FISCMBE 235
3pdo.1.B TGLLNGDWTFOQLVMLITVPRSGEVYTCOVHP SVTSEPLIVEARRS----- 193
Model_01 RPQSSLNDSLEQSSDNSVNPASVSLMDIEPQADQDPVA 273
3pdo.1.B -----

```

7. allis shad (WA  $\alpha$ 1 + WB  $\beta$ 1 $\beta$ 2) / WA  $\alpha$ 2

SWISS-MODEL No. 1 template 6lhf.1 Chicken MHC class I BF2

```

Model_11 DYEAVSILAYTRLTSRDSVEQGVLVLVNEAVFAYEATEKTFLLRPTAMAGFSVLEAKERMYCVSEVINAFPRQQDY--- 77
6lhf.1.A -----PGQPFVVDVGYDSELFTHYSTARRAPRTGWIAANT-----IQQYWDSETQTSORTEQIDRDG 76
Model_11 LDKLIKQTNGAKPPKDEFTYQQYIGCAPNRQGVGRFWRVYGPNTKDIMOVDLKNEAVVAVSDEGNFMAEERQSKVYFKDK 157
6lhf.1.A LGTLQRRYNQT---GGSHIVQIMYGCLEEDGTRGYSQDLDGRDFAEPKDTMIFPTAVVEAVPTKRKKEEGDYAEGI 153
Model_11 EYKLMRICALVNTVFLQ-SNN(SL)SKDKKPTVRSLEESGKEYIMCSVOGEPNTISVRHWVXGKIVHFARTDTGLLDRK 236
6lhf.1.A KOYLEETCVEWLRRYVEVWAEIDGRRAPPEVRVWGRADGILTLCRAHGFPRPIAVRWVLDGQGDQSGGGIVNG 233
Model_11 DGTFOQITSYLLGNKTLQDIVCETEPI SIEGTLOATI 273
6lhf.1.A DGTVHTWVITIDPPGIDGPPFCRVEEASLPQPPGLV- 269

Model_11 SPSVNVVYSHFPAMPGSPNYLYCYATGEPGDI EISFVINGRDFP GPTESDDLVDGEDWTFRVEFKYISDLPLPGEVYECF 80
6lhf.1.B LTPKVVQVYSRFPASAGTINVLNCFALGEPKPKISITLWGGVMEG-AQSDMSADDWTFORLVHARTPSSGSTVAC 79
Model_11 VPHSSLAQPKITVW 94
6lhf.1.B VPHETLKEPQVVVW 93

```

SWISS-MODEL No. 10 template 3wuw.1 Human MHC class I HLA-B57

|          |                                                                                                          |     |
|----------|----------------------------------------------------------------------------------------------------------|-----|
| Model_16 | DYEAVSILAYTRITTS--RDSVEQGVLVLDNEAVFAYENAT--EKTFLDRPTAMAGFSVLEAKEEMYCVSEVINAFPRQQE                        | 76  |
| 3wuw.1.A | -----YTA--SRPGRGEF--RPIAVGVYDDITQFVRF--SDAASPRM--RAEHWIEQE-----GPEYWDGETRNMKASAOI                        | 73  |
| Model_16 | N---LDKLIKQTNQAKPPKDEFIYQQYIGCAFPRQG-PVGRFWRYGENTKDIMQVQLKNEAVVVSDEGNFMAEERQSKV                          | 152 |
| 3wuw.1.A | YRENLRRTALRYVY--NQSE--AGSH--TIQVMYGC--GPDG--LLRGRDQSA--GKDYL--NEDLSSNT--ADTAAQITQRKWE--AR                | 151 |
| Model_16 | YFKDKKEYKLMR(ICSAVNTVFD)G-SNNSLSKDKKPTVRSLEE--SEGKEYIMCSVQGES--PNTISVRWVYKGGKIVHFA--RTDT                 | 230 |
| 3wuw.1.A | VAEQLRAYL--G(LCVELRRLRYLEN)G(KETL)QRA--P(KIHV)THE--SDHEATLRCWALGE--PAEILLLW--G--G--QTQDT--E--V           | 231 |
| Model_16 | GILPRKDGTFQITSYLTIGNKTLQDIVCETPHISIEGTLOPTI                                                              | 273 |
| 3wuw.1.A | EIR--PAGDRT--FQKWA--AVV--SGEEQR--YTCRV--HEGLPK--FLT--R--                                                 | 273 |
| Model_16 | ISPSVNVVYSHFPAMPGPSNYLYCYATGPPYPGDIETISFVINGRDPFGPTES--SDIVYGEDWTFRVFKYIS--LPLPGEVYECG                   | 80  |
| 3wuw.1.B | -T--PKIQVYS--RHFAENGK--NPLNCYVSGE--P--SDIEVDIL--NGE--IE--KV--E--SDL--S--SKDWS--FYLLY--Y--T--PTEKDE--YACG | 80  |
| Model_16 | VNPSSLAQPKITVW                                                                                           | 94  |
| 3wuw.1.B | V--H--VILSQPK--IV--W                                                                                     | 94  |

## 11. Additional explanations for Fig. S5

### Figure S5

#### A

At the corresponding position of  $\beta_2$ -m [Y]67, WA  $\alpha_2$  and  $\beta_2$ -m molecules of phylogenetically more primitive animals often possess a lysine or an arginine, and indeed a lysine can be seen at this position in the structure of grass carp  $\beta_2$ -m (PDB ID: 3GBL and 5Y91) forming intra-domain hydrogen bonds (69) (*SI Appendix* and Fig. S7). At the corresponding position of I  $\alpha_3$ [T]55, many WB  $\beta_2$  and several class I  $\alpha_3$  domains possess an isoleucine, and at the corresponding position of I  $\alpha_3$ [P]95, many WB  $\beta_2$  and several class I  $\alpha_3$  possess a lysine.

#### B

The class II  $\alpha_1$  residues described in the preceding part of this legend are not conserved in the corresponding positions of W-category and class I molecules (Dataset S1). However, for inter-domain interactions between the membrane-distal and the membrane-proximal domains, MHC class II molecules use regions roughly corresponding to those used by MHC class I molecules (31). The amino acid residues of HLA-DR1 described above are located in these regions. All the residues of HLA-DR1 involved in the interface interaction between the membrane-distal and the membrane-proximal domains according to ref. 31 are described in the legends of Datasets S1 and S2.

#### C

Among the residues described hitherto in this legend, several (color-shaded) are involved in inter-domain interactions as follows (29): I  $\alpha_2$ Q6, I  $\alpha_2$ A32, I  $\alpha_2$ G35 and I  $\alpha_2$ D37 interact with  $\beta_2$ -m W61, I  $\alpha_2$ Q6 also interacts with  $\beta_2$ -m F57, I  $\alpha_1$ V30 interacts with the main chain of  $\beta_2$ -m L55 and I  $\alpha_1$  R60 interacts with  $\beta_2$ -m D54. I  $\alpha_2$ K36 interacts with the first residue (an isoleucine) of the mature  $\beta_2$ -m peptide, which is not included in Fig. 3 and Dataset S2 and not conserved among  $\beta_2$ -m. This figure does not show all the residues involved in inter-domain interaction between  $\beta_2$ -m and the membrane-distal domains. In HLA-A2,  $\beta_2$ -m W61 interacts with two more residues of the  $\alpha_2$  domain (I  $\alpha_2$ Q30 and I  $\alpha_2$ Y31) in addition to those described above.  $\beta_2$ -m W61 appears to play an important role at the interface with such many interactions (two of them are hydrogen bonds,  $\beta_2$ -m W61 to I  $\alpha_2$ Q6 and  $\beta_2$ -m W61 to I  $\alpha_2$ D37). All the residues of HLA-A2 involved in the interface interaction between the membrane-distal and the membrane-proximal domains according to ref. 29 are described in the legends of Datasets S1 and S2.

In the MHC class I structure, the  $\beta_2$ -m and class I  $\alpha_3$  domains, which are classified as C1-set Ig-like domains, unexpectedly possess asymmetrical structural arrangements (25) as shown in A, namely, they are not related by a dyad ( $180^\circ$ ) symmetry, whereas several other molecules such as antibodies and T cell receptors show a dyad symmetry in the arrangements of their dimeric C1-set Ig-like domains [e.g., C<sub>H1</sub> and C<sub>L</sub> in an Fab, and C<sub>H3</sub> dimer in Fc in case of antibodies (73); C $\alpha$  and C $\beta$  in case of T cell receptors (74)]. This special asymmetrical structural organization of MHC class I Ig-like domains is essentially also observed for the two Ig-like domains (class II  $\alpha_2$  and  $\beta_2$  domains) of an MHC class II molecule (27) (see B). An MHC class I molecule can superimpose onto an MHC class II molecule although there is a small difference in angle for the arrangements between the class I  $\alpha_3$  and class II  $\beta_2$  domains (27).

In this figure, human HLA-A2 (PDB ID: 1AO7) and human HLA-DR1 (PDB ID: 1DLH) are used as representative MHC class I and conventional class II molecules, respectively. For class I molecules, overall structures largely similar to that of HLA-A2 have been reported for other classical class I molecules, e.g., mouse (30) (PDB ID: 2VAA), chicken (75) (PDB ID: 3BEV) and grass carp (PDB ID: 5Y91). Topologically similar overall structures also have been found for highly divergent class I molecules including, for example, mouse CD1 (76) (PDB ID: 1CD1), chicken CD1 (77) (PDB ID: 3DBX) and rat FcRn (78) (PDB ID: 1EXU). In these class I structures, several conserved residues can be observed at the interface between the membrane-distal and the membrane-proximal domains described in this legend including  $\beta_2$ -m W61. Also for class II molecules, largely similar overall structures with highly conserved W61 in the  $\beta_2$  domain have been reported

for the DM molecules of human (PDB ID: 1HDM) and mouse (PDB ID: 1K8I), whose sequences are highly divergent from the classical MHC class II molecules (Datasets S1 and S2).

In the figure, only for the residues relevant for the discussion, their side chains are shown as a ball-and-stick representation. The MHC class I domains are colored as follows: yellow, green, blue and red for  $\alpha 1$ ,  $\alpha 2$ ,  $\alpha 3$  and  $\beta 2$ -m, respectively. The MHC class II domains are colored as follows: salmon pink, magenta, light green and light blue for II A  $\alpha 1$ , II A  $\alpha 2$ , II B  $\beta 1$  and II B  $\beta 2$ , respectively. Each pair of corresponding domains of MHC class I and class II molecules (class I  $\alpha 1$ /class II  $\alpha 1$ ,  $\beta 2$ -m/class II  $\alpha 2$ , class I  $\alpha 2$ /class II  $\beta 1$  and class I  $\alpha 3$ /class II  $\beta 2$ , see Fig. 8) possesses related colors. The highlighted amino acid residues with a ball-and-stick representation have colors similar to those of the domain to which the relevant residue belongs. Bound peptides are shown in the color purple. Disulfide bridges formed by two cysteine residues are shown in dark brown color.

The numbers of amino acid positions are based on Dataset S1 for the membrane-distal domains, and Fig. 3/ Dataset S2 for the Ig-like domains. The corresponding amino acid numbers in HLA-A2 (ref. 29) or the respective chain of HLA-DR1 (ref. 31) for the residues used in the figure are as follows: the numbers in HLA-A2 are shown in parentheses, I  $\alpha 1$ S4 (4), I  $\alpha 1$ R21 (17), I  $\alpha 1$ G22 (18), I  $\alpha 1$ V30 (25), I  $\alpha 1$ V33 (28), I  $\alpha 1$ T36 (31), I  $\alpha 1$ F38 (33), I  $\alpha 1$ F41 (36), I  $\alpha 1$ R60 (48), I  $\alpha 2$ H3 (93), I  $\alpha 2$ Q6 (96), I  $\alpha 2$ G11 (100), I  $\alpha 2$ A32 (117), I  $\alpha 2$ G35 (120), I  $\alpha 2$ K36 (121), I  $\alpha 2$ D37 (122), I  $\alpha 3$ T55 (233), I  $\alpha 3$ P57 (235), I  $\alpha 3$ G61 (239), I  $\alpha 3$ P95 (269),  $\beta 2$ -m L37 (39),  $\beta 2$ -m L55 (54),  $\beta 2$ -m F57 (56),  $\beta 2$ -m W61 (60),  $\beta 2$ -m Y67 (66); the numbers in HLA-DR1 are shown in parentheses, IIA  $\alpha 1$ F34 (26), IIA  $\alpha 1$ L72 (45), IIA  $\alpha 1$ F75 (48), IIA  $\alpha 2$ H61 (143). IIB  $\beta 2$ W61 (153).



## 12. Notes for Datasets

### Dataset S1: Amino acid comparison of the membrane-distal domains of W-category and other MHC molecules.

The classification of molecules is shown in the first column. The following classification is used:

WA  $\alpha 1$  (W-category  $\alpha$  chain  $\alpha 1$  domain), I  $\alpha 1$  (class I  $\alpha 1$  domain), I nc  $\alpha 1$  (nonclassical class I  $\alpha 1$  domain), IIA  $\alpha 1$  (class II  $\alpha$  chain  $\alpha 1$  domain), DOA  $\alpha 1$  ( $\alpha 1$  domain of HLA-DO  $\alpha$  chain related), DMA  $\alpha 1$  ( $\alpha 1$  domain of HLA-DM  $\alpha$  chain related), IIA nc  $\alpha 1$  teleost (nonclassical class II  $\alpha$  chain  $\alpha 1$  domain of teleost fish), WB  $\beta 1$  (W-category  $\beta$  chain  $\beta 1$  domain), I  $\alpha 2$  (class I  $\alpha 2$  domain), I nc  $\alpha 2$  (nonclassical class I  $\alpha 2$  domain), IIB  $\beta 1$  (class II  $\beta$  chain  $\beta 1$  domain), DOB  $\beta 1$  ( $\beta 1$  domain of HLA-DO  $\beta$  chain related), DMB  $\beta 1$  ( $\beta 1$  domain of HLA-DM  $\beta$  chain related), IIB nc  $\beta 1$  teleost (nonclassical class II  $\beta$  chain  $\beta 1$  domain of teleost fish).

The shading principles are as follows:

Red, residues which are shared between WA  $\alpha 1$  and class I  $\alpha 1$  domains but very uncommon in classical class II  $\alpha 1$  domains;

Blue, residues which are shared between WB  $\beta 1$  and class I  $\alpha 2$  domains but very uncommon in classical class II  $\beta 1$  domains;

Purple, conserved residues interacting with bound peptide termini in classical class I (the same residues at the same position in most of the other aligned domain types are also shaded with purple color for comparison, but in case of irrelevant class I domains, those are shaded with pale orange color);

Moss green, conserved residues interacting with a bound peptide in classical class II (the same residues at the same position in most of the other aligned domain types are also shaded with moss green color for comparison, but in case of irrelevant class II domains, those are shaded with pale orange color);

Dark gray, conserved tryptophans in class I  $\alpha 1$  domains (position 73) and class I  $\alpha 2$  domains (position 57);

Light green, residues found in many teleost WB and classical class II  $\beta 1$  domains;

Pale gray, N-glycosylation motif NX(S/T) found in the last part of domains, all residues of N and/or (S/T) at the same positions are shaded irrespective of the completeness of the motif;

Orange, residues frequently observed in WB  $\beta 1$ , class I  $\alpha 2$  and class II  $\beta 1$  but not in WA  $\alpha 1$ , class I  $\alpha 1$  and also not in class II  $\alpha 1$  except position 33;

Pink and magenta, specific for WA  $\alpha 1$  domain (F57) and WB  $\beta 1$  domain (Q7, C27 and W29), respectively;

Black, highly conserved cysteines in class I  $\alpha 2$  and class II  $\beta 1$  domains, and also in DM  $\alpha 1$  domains and bony fish and some cartilaginous fish class II  $\alpha 1$  domains;

Yellow, commonly observed in various MHC membrane-distal domains;

Bright purple, "LN" motif observed in banded houndshark WB\_DS1 and WB\_DS3;

Dark brown, conserved tryptophan in class II  $\alpha 1$  domain (position 59), which is important for the interaction with DM molecules (79);

Pale blue, three residues with this color-shading in the last part of domains are highly conserved in class I  $\alpha 2$  domains.

The amino acid residues in the membrane-distal domains of the human classical MHC class I HLA-A2 molecule which participate in the inter-domain interactions between the membrane-distal domains and the Ig-like domains are as follows (ref. 29) (for convenience, in the following listing, not only the residue numbering of this figure but also, in parentheses, the residue numbering of HLA-A2 in ref. 29 is shown):

I  $\alpha 1/\alpha 2$  with  $\beta 2$ -m, I  $\alpha 1$ F8 (8), I  $\alpha 1$ F10 (9), I  $\alpha 1$ T11 (10), I  $\alpha 1$ V13 (12), I  $\alpha 1$ I28 (23), I  $\alpha 1$ V30 (25), I  $\alpha 1$ Y32 (27), I  $\alpha 1$ Q37 (32), I  $\alpha 1$ R40 (35), I  $\alpha 1$ R60 (48), I  $\alpha 2$ T4 (94), I  $\alpha 2$ Q6 (96), I  $\alpha 2$ Q30 (115), I  $\alpha 2$ Y31 (116), I  $\alpha 2$ A32 (117), I  $\alpha 2$ D34 (119), I  $\alpha 2$ G35 (120), I  $\alpha 2$ K36 (121), I  $\alpha 2$ D37(122); I  $\alpha 1/\alpha 2$  with I  $\alpha 3$ , I  $\alpha 1$ D34 (29), I  $\alpha 1$ D35 (30), I  $\alpha 1$ T36 (31), I  $\alpha 2$ L124 (179), I  $\alpha 2$ R126 (181), I  $\alpha 2$ T127 (182).

In case of human classical MHC class II HLA-DR1 molecule, the amino acid residues in the membrane-distal domains which participate in the inter-domain interactions between the membrane-distal domains and the Ig-like domains are as follows (ref. 31) (for convenience, in the following listing, not only the residue numbering of this figure but also, in parentheses, the residue numbering of the respective chain of HLA-DR1 in ref. 31 is shown):

II  $\alpha 1/\beta 1$  with II  $\alpha 2/\beta 2$ , II  $\alpha 1I6$  (8), II  $\alpha 1A8$  (10), II  $\alpha 1F11$ (12), II  $\alpha 1L13$  (14), II  $\alpha 1D16$  (17), II  $\alpha 1E28$  (21), II  $\alpha 1M30$  (23), II  $\alpha 1F33$  (26), II  $\alpha 1D34$  (27), II  $\alpha 1G35$  (28), II  $\alpha 1D36$  (29), II  $\alpha 1E37$  (30), II  $\alpha 1I38$  (31), II  $\alpha 1H40$  (33), II  $\alpha 1R60$  (44), II  $\alpha 1L71$  (45), II  $\alpha 1F74$  (48), II  $\beta 1R2$  (6), II  $\beta 1L4$  (8), II  $\beta 1Q6$  (10), II  $\beta 1K8$  (12), II  $\beta 1R30$  (29), II  $\beta 1F32$  (31), II  $\beta 1Q35$  (34).

The sequences used in this figure are listed in Table S3.

## **Dataset S2: Amino acid comparison of the membrane-proximal, Ig-like domains of W-category and other MHC molecules.**

The classification of molecules is shown in the first column. The following classification is used:

WA  $\alpha 2$  (W-category  $\alpha$  chain  $\alpha 2$  domain),  $\beta 2$ -m ( $\beta 2$ -microglobulin), IIA  $\alpha 2$  (class II  $\alpha$  chain  $\alpha 2$  domain), DOA  $\alpha 2$  ( $\alpha 2$  domain of HLA-DO  $\alpha$  chain related), DMA  $\alpha 2$  ( $\alpha 2$  domain of HLA-DM  $\alpha$  chain related), IIA nc  $\alpha 2$  teleost (nonclassical class II  $\alpha$  chain  $\alpha 2$  domain of teleost fish), WB  $\beta 2$  (W-category  $\beta$  chain  $\beta 2$  domain), I  $\alpha 3$  (class I  $\alpha 3$  domain), I nc  $\alpha 3$  (nonclassical class I  $\alpha 3$  domain), IIB  $\beta 2$  (class II  $\beta$  chain  $\beta 2$  domain), DOB  $\beta 2$  ( $\beta 2$  domain of HLA-DO  $\beta$  chain related), DMB  $\beta 2$  ( $\beta 2$  domain of HLA-DM  $\beta$  chain related), IIB nc  $\beta 2$  teleost (nonclassical class II  $\beta$  chain  $\beta 2$  domain of teleost fish).

The shading principles are as follows:

Red, residues which are shared between WA  $\alpha 2$  and  $\beta 2$ -m domains but very uncommon in classical class II  $\alpha 2$  domains;

Blue, residues which are shared between WB  $\beta 2$  and class I  $\alpha 3$  domains but very uncommon in classical class II  $\beta 2$  domains;

Green, often found in WA  $\alpha 2$ ,  $\beta 2$ -m and class IIA  $\alpha 2$ ;

Light blue, a tryptophan (position 37) conserved in many Ig-superfamily members and observed except WA  $\alpha 2$ ,  $\beta 2$ -m, and some class I  $\alpha 3$ ;

Orange, observed in class I  $\alpha 3$  and class IIB  $\beta 2$ ;

Purple, a leucine residue (position 70) conserved in conventional class II  $\alpha 2$  and  $\beta 2$  domains;

Black, highly conserved cysteines in Ig-like domains;

For the co-receptor CD8 binding to classical MHC class I molecule, I  $\alpha 3Q48$  [226 in HLA-A2 (ref. 29)] is the most important residue (80, 81). This glutamine residue is generally not conserved in I  $\alpha 3$ -corresponding WB sequences. Only banded houndshark WB\_DS1 and WB\_DS3 possess a glutamine residue at this position.

For the co-receptor CD4 binding to a classical MHC class II molecule, the following residues of the class II molecule have been reported to interact with CD4 (82) (for convenience, in the following listing, not only the residue numbering of this figure but also, in parentheses, the residue numbering of the respective chain of HLA-DR1 in ref. 31 is shown): II  $\alpha 2E4$ (88), II  $\alpha 2T6$ (90), II  $\alpha 2K99$ (176), II  $\beta 2S10$ (104), II  $\beta 2L20$ (114), II  $\beta 2V22$ (116), II  $\beta 2M50$ (142), II  $\beta 2V51$ (143), II  $\beta 2S52$ (144), II  $\beta 2T54$ (145), II  $\beta 2I57$ (148), II  $\beta 2L67$ (158), II  $\beta 2M69$ (160), II  $\beta 2E71$ (162).

The amino acid residues in the Ig-like domains of the human classical MHC class I HLA-A2 molecule which participate in the inter-domain interactions between the membrane-distal and the membrane-proximal Ig-like domains are as follows (ref. 29) (for convenience, in the following listing, not only the residue numbering of this figure but also, in parentheses, the residue numbering of HLA-A2 heavy chain and  $\beta 2$ -m in ref. 29 is shown):  $\beta 2$ -m with I  $\alpha 1/\alpha 2$ ,  $\beta 2$ -m I (not included) (1),  $\beta 2$ -m R1 (3),  $\beta 2$ -m H29 (31),  $\beta 2$ -m S31 (33),  $\beta 2$ -m D54 (53),  $\beta 2$ -m L55 (54),  $\beta 2$ -m S56 (55),  $\beta 2$ -m F57 (56),  $\beta 2$ -m W61 (60),  $\beta 2$ -m F63 (62),  $\beta 2$ -m Y64 (63);  $\alpha 3$  with I  $\alpha 1/\alpha 2$ , I  $\alpha 3D1$  (183), I  $\alpha 3Y29$  (209), I  $\alpha 3P30$  (210), I  $\alpha 3A31$  (211), I  $\alpha 3F63$  (241), I  $\alpha 3E89$  (264).

In case of human classical MHC class II HLA-DR1 molecule, the amino acid residues in the Ig-like domains which participate in the inter-domain interactions between the membrane-distal and the membrane-proximal Ig-like domains are as follows (ref. 31) (for convenience, in the following listing, not only the residue numbering of this figure but also, in parentheses, the residue numbering of the respective chain of HLA-DR1 in ref. 31 is shown): II  $\alpha 2$  with II  $\alpha 1/\beta 1$ , II  $\alpha 2T29$  (113), II  $\alpha 2P30$  (114), II  $\alpha 2P31$  (115), II  $\alpha 2V32$  (116), II

$\alpha$ 2T53 (135), II  $\alpha$ 2V54 (136), II  $\alpha$ 2F55 (137), II  $\alpha$ 2L56 (138), II  $\alpha$ 2P57 (139), II  $\alpha$ 2R58 (140), II  $\alpha$ 2E59 (141), II  $\alpha$ 2D60 (142), II  $\alpha$ 2H61 (143), II  $\alpha$ 2L62 (144), II  $\alpha$ 2F63 (145), II  $\alpha$ 2R64 (146), II  $\alpha$ 2Y68 (150), II  $\alpha$ 2W89 (168); II  $\beta$ 2 with II  $\alpha$ 1/ $\beta$ 1, II  $\beta$ 2Y29 (123), II  $\beta$ 2Q57 (149), II  $\beta$ 2G59 (151), II  $\beta$ 2D60 (152), II  $\beta$ 2W61 (153).

At position 61, several C1-set Ig-like domains of other molecules, such as tapasin (57), some B7 members (83), antibodies (e.g., 57, 78) and signal-regulatory protein (SIRP)  $\alpha$  (84), possess a glycine. Thus, a glycine is one of the candidate residues at position 61 in the primordial class II molecule.

In the oriental weatherfish WB\_01 sequence, two amino acid residues (SW) between positions 37 and 38 are not included.

In the outgroup sequences used in the phylogenetic analyses, the following amino acid residue(s) are not included after the amino acid position numbers indicated. In the house mouse IgM sequence: 15, N; 39, R; 59, GA; 77, N. In the human IgM sequence: 15, N; 39, R; 59, QA; 77, N. In the house mouse TCRB sequence: 11, KA; 55, A; 74, FW; 75, N; 91, SEEDKWPEGSPKPV. In the human TCRB sequence: 11, EA; 55, P; 59, PALN; 74, FW; 75, N; 91, SENDEWTQDRAKPV. In the house mouse tapasin: 15, AP; 32, G; 40, GGPGGSS; 77, KQ. In the human tapasin: 15, AP; 32, G; 40, GGPGGRS; 77, EQ.

For the phylogenetic tree analyses, the following three regions in which the three outgroup molecules exhibit high structural variations compared to the MHC molecules were not included: the amino acid position numbers 11-18, 73-80 and 92-93.

The sequences used in this figure are listed in Table S3. The numbers of amino acid positions shown at the top equal those in Fig. 3 and the positions with asterisks are not included for numbering.

### **Dataset S3: Conservation of $\alpha$ chain or $\beta$ chain-specific motifs in the TM region of the W-category molecules.**

CP/TM/CY region sequences of W-category and other class II molecules are compared. The classifications of molecules are indicated in the first column. In the TM region, W-category sequences possess heptad repeats of glycine residues reported previously for conventional class II sequences (24, 79, 85, 86). MHC class I molecules do not display these features. Other small amino acid residues, e.g., an alanine (A) or a serine (S), can often replace a glycine. Notable differences between class II  $\alpha$  and  $\beta$  chains are those at positions 21 and 31. Three residues (F, L, A) between positions 27 and 28 of fat head minnow WB\_01 are not included. The shading colors are used as follows: purple, cysteine (C); brown, glycine (G); green, alanine (A) or serine (S).

### 13. Detailed Author Contributions

K.O. contributed to experiments including isolation of cDNA library clones of banded houndshark *WB\_DS1* and *WB\_DS3*, isolation of *WB\_DS3* genomic clones and their initial sequence determination, isolation of *WA\_DS10*, isolation of salamander W-category cDNAs, Southern blot analyses, linkage and expression experiments for banded houndshark W-category genes, and experiments regarding  $\beta_2$ -m. J.M.D. contributed to the planning for the expansion of the study with identification of W-category genes from various animals including little skate, various teleost fish, coelacanth, lungfish and salamander, isolated cDNAs from lungfish, goldfish, Mexican tetra, salamander and zebrafish, determined their sequences, and performed the study on polymorphism of zebrafish W-category genes. K.T. contributed to the identification and isolation of cDNAs of banded houndshark *WA\_DS5*, isolated cDNAs of banded houndshark *WB\_DS1* and *WB\_DS3* using RT-PCR, performed intensive study of determination of the genomic organizations of banded houndshark *WA\_DS5*, *WA\_DS10* and *WB\_DS3*, determined the partial genomic organization of *WB\_DS1\_n1*, and conducted experiments using recombinant proteins of W-category molecules. U.G. performed extensive searches for MHC sequences in the teleost fish genome databases and identified unclassified MHC sequences from the zebrafish database. G.F.W. performed the study of the sequences of the common carp genome and identified the duplicated common carp W-category genes. A.K. performed the experiments of the expression of the zebrafish W-category genes and studied salamander class I sequences for comparison. H.Y. performed comparative structural analyses of MHC sequences using Chimera program for the basis of sequence alignments. K.H. conceived the study, performed the initial experiments including isolation of DNA fragments of banded houndshark *WA\_DS5* and *WB\_DS3*, and banded houndshark genomic library screening, contributed to the identification of banded houndshark *WA\_DS10*, identified *WA\_Nds3L* and *WB\_Nds5L*, analyzed conservation profile of teleost fish W-category molecules, conducted database searches, phylogenetic estimation, and molecular modeling, analyzed the results, and wrote the manuscript with great helps from J.M.D., K.T., K.O., U. G. and G. F. W.

Fig. S1

A Shark/skate WA\_DS5

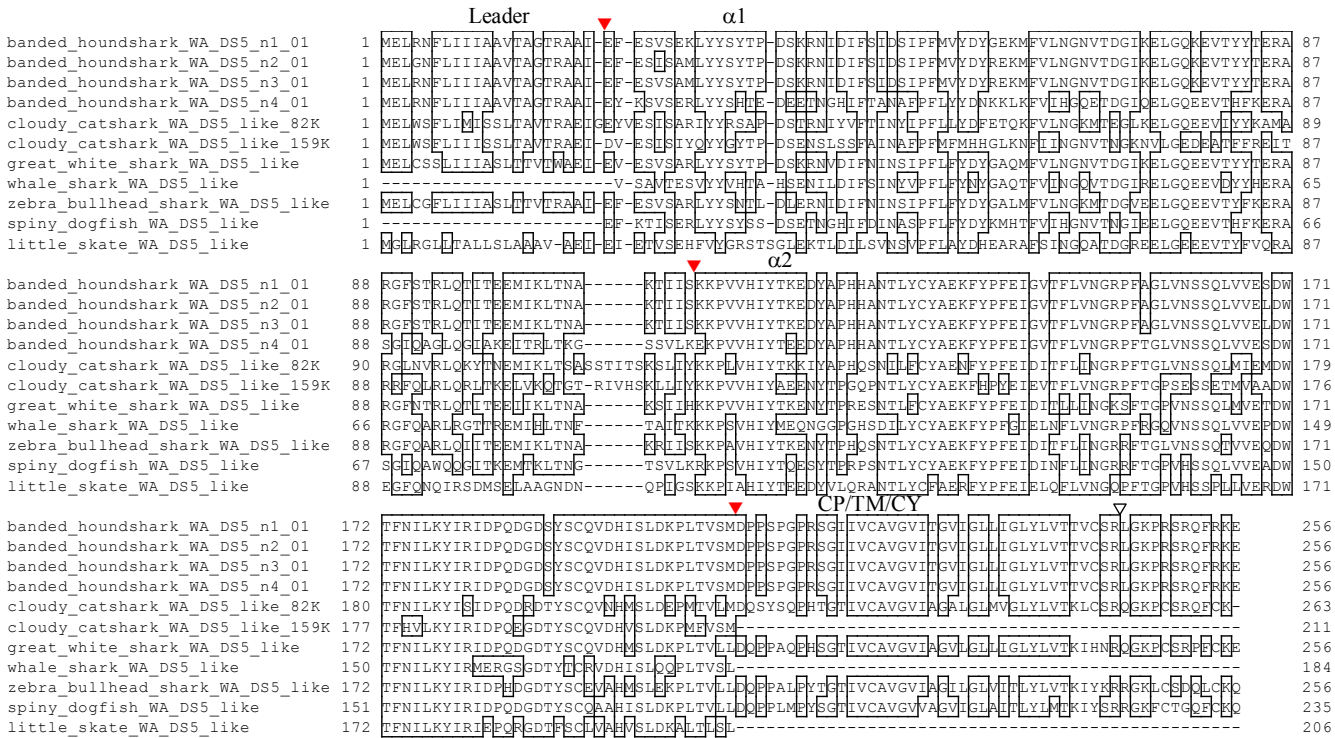

B Shark/skate WA\_DS10

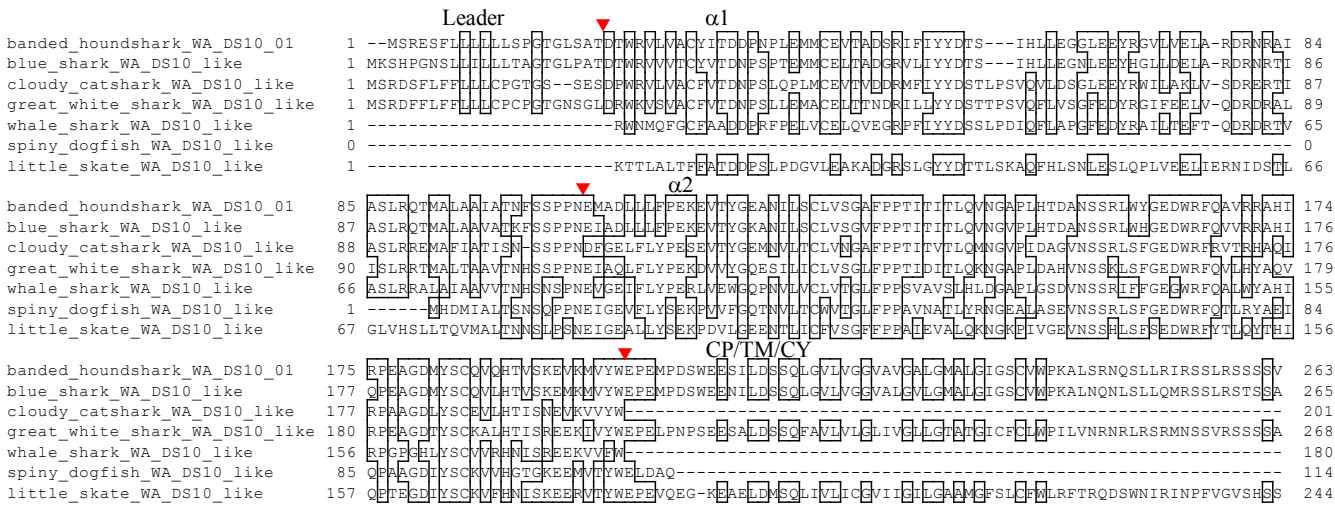

C Shark WA\_Nds3L

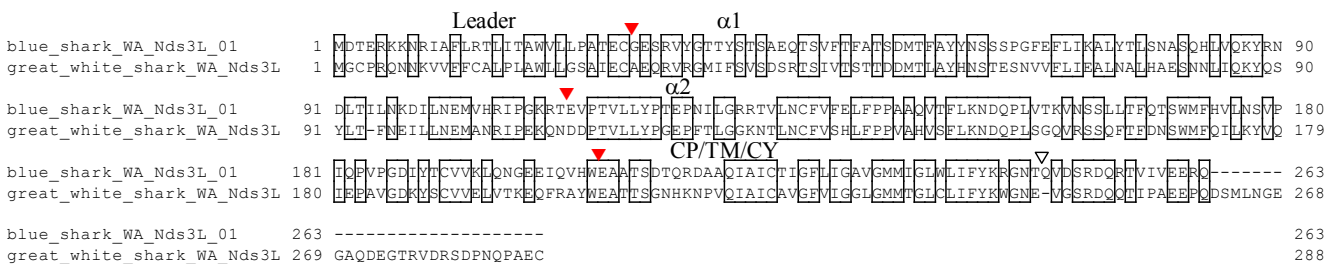

Fig. S1

D Teleost fish WA

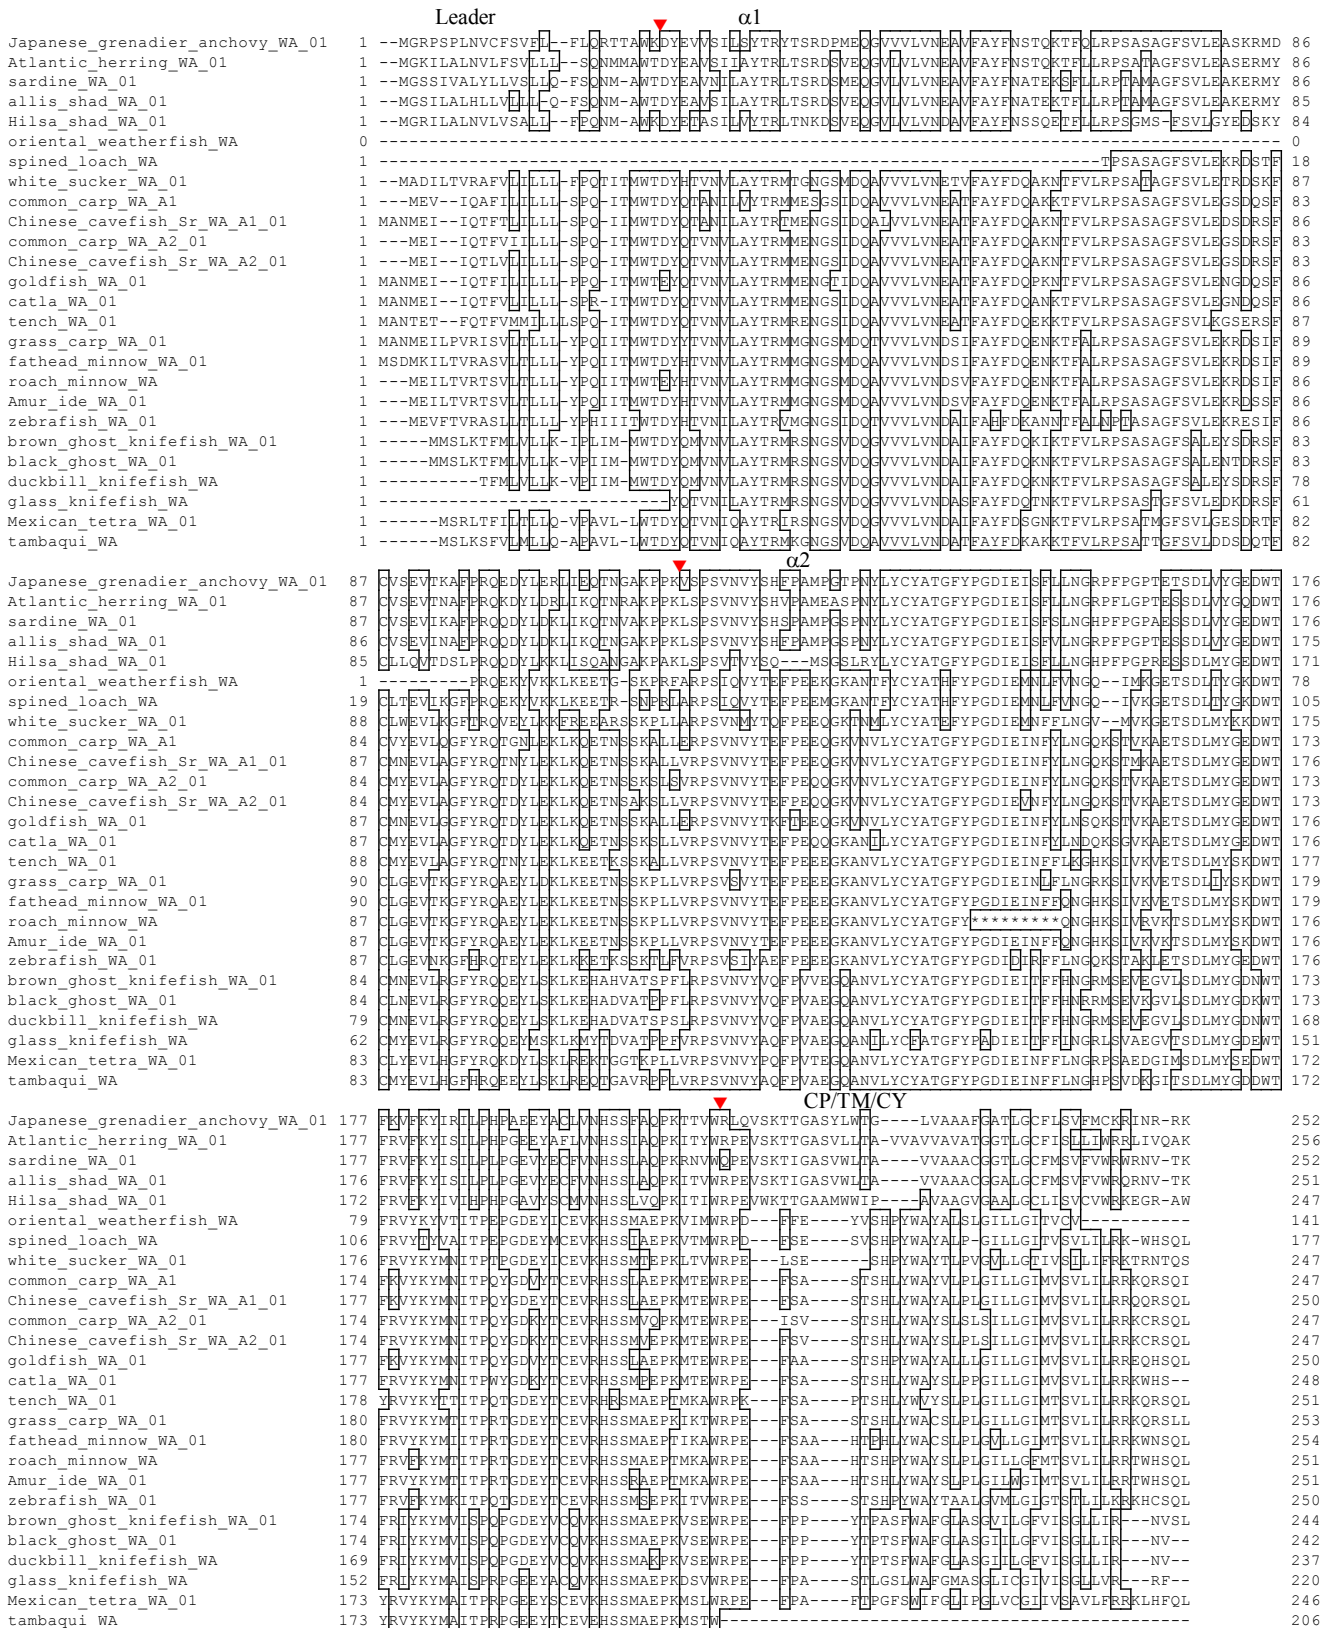

**Fig. S1**

**E Lobe-finned fish WA\_1 and WA\_2**

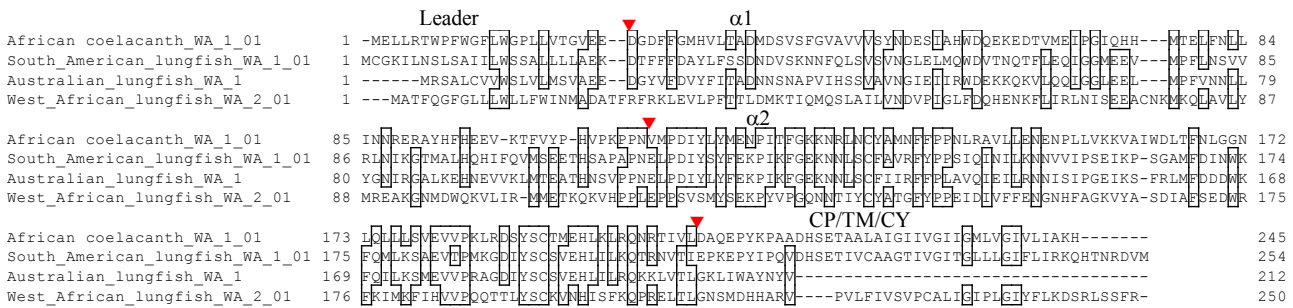

**F Salamander WA**

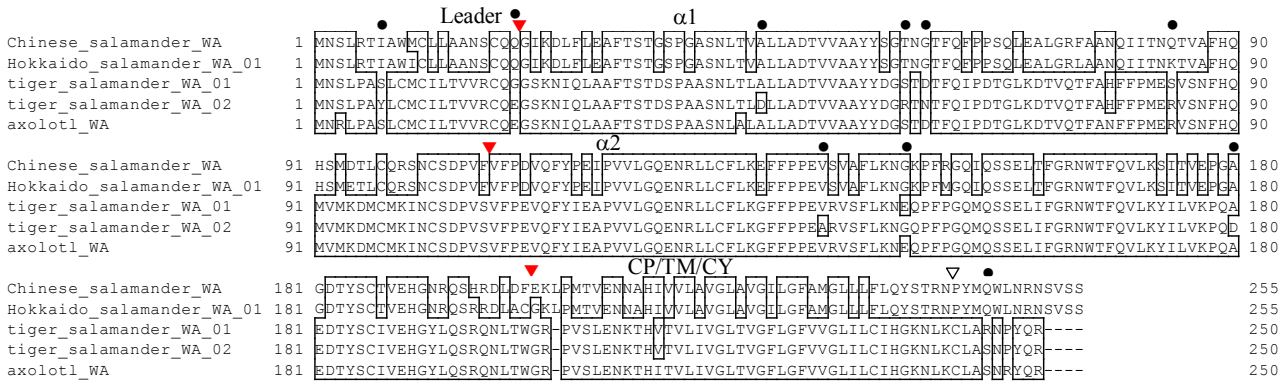

**Fig. S1. Representative W-category  $\alpha$  chain (WA) sequences from cartilaginous fish, teleost fish, lobe-finned fish and salamanders.**

**A**, banded houndshark WA\_DS5 and closely-related sequences of other cartilaginous fish. From a single individual banded houndshark, four kinds of WA\_DS5 cDNA sequences were obtained. Currently, the allelic relationship of these sequences is not clear. **B**, banded houndshark WA\_DS10 and closely-related sequences of other cartilaginous fish. **C**, blue shark and great white shark WA\_Nds3L sequences. **D**, WA sequences of teleost fish. Information of the oriental weatherfish WA sequence is currently incomplete. The additional twenty-two residues in the last part of sardine WA\_01 and the additional two residues in the last part of Hilsa shad WA\_01 are not included. **E**, WA sequences of lobe-finned fish including African coelacanth and three kinds of lungfish. **F**, WA sequences of salamanders. The positions where the two tiger salamander WA sequences (obtained from a single individual and presumable alleles) show disparity are shown by black circles above the sequences.

The borders of the corresponding exons are shown by red arrowheads. Additional borders within the CP/TM/CY region are shown by open arrowheads. All sequences used in this figure are listed in Table S3 and composite or corrected sequences are described in *SI Appendix*.



Fig. S2

A Shark/skate WB\_DS1

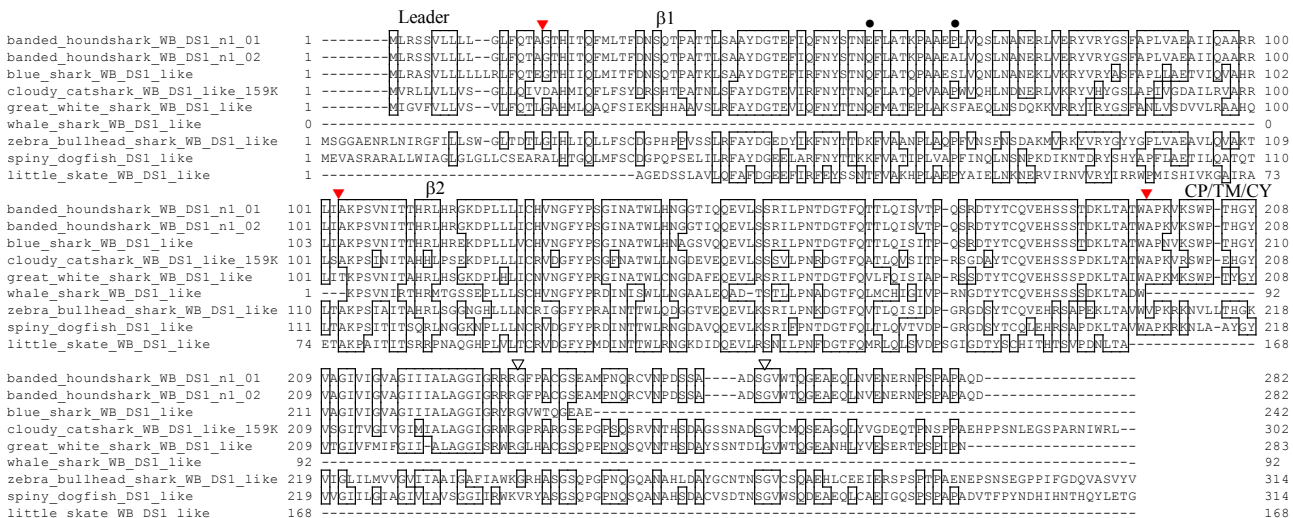

B Shark/skate WB\_DS3

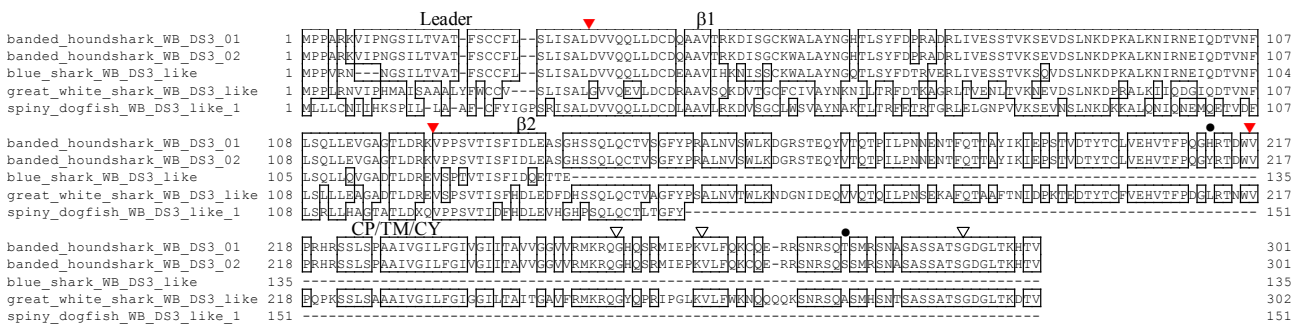

C Shark WB\_Nds5L

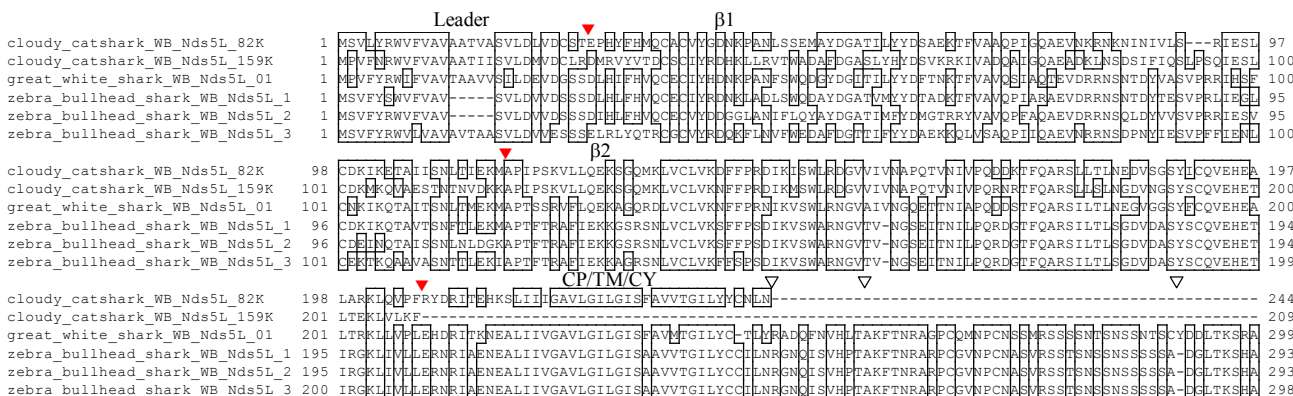

Fig. S2

D Teleost fish WB

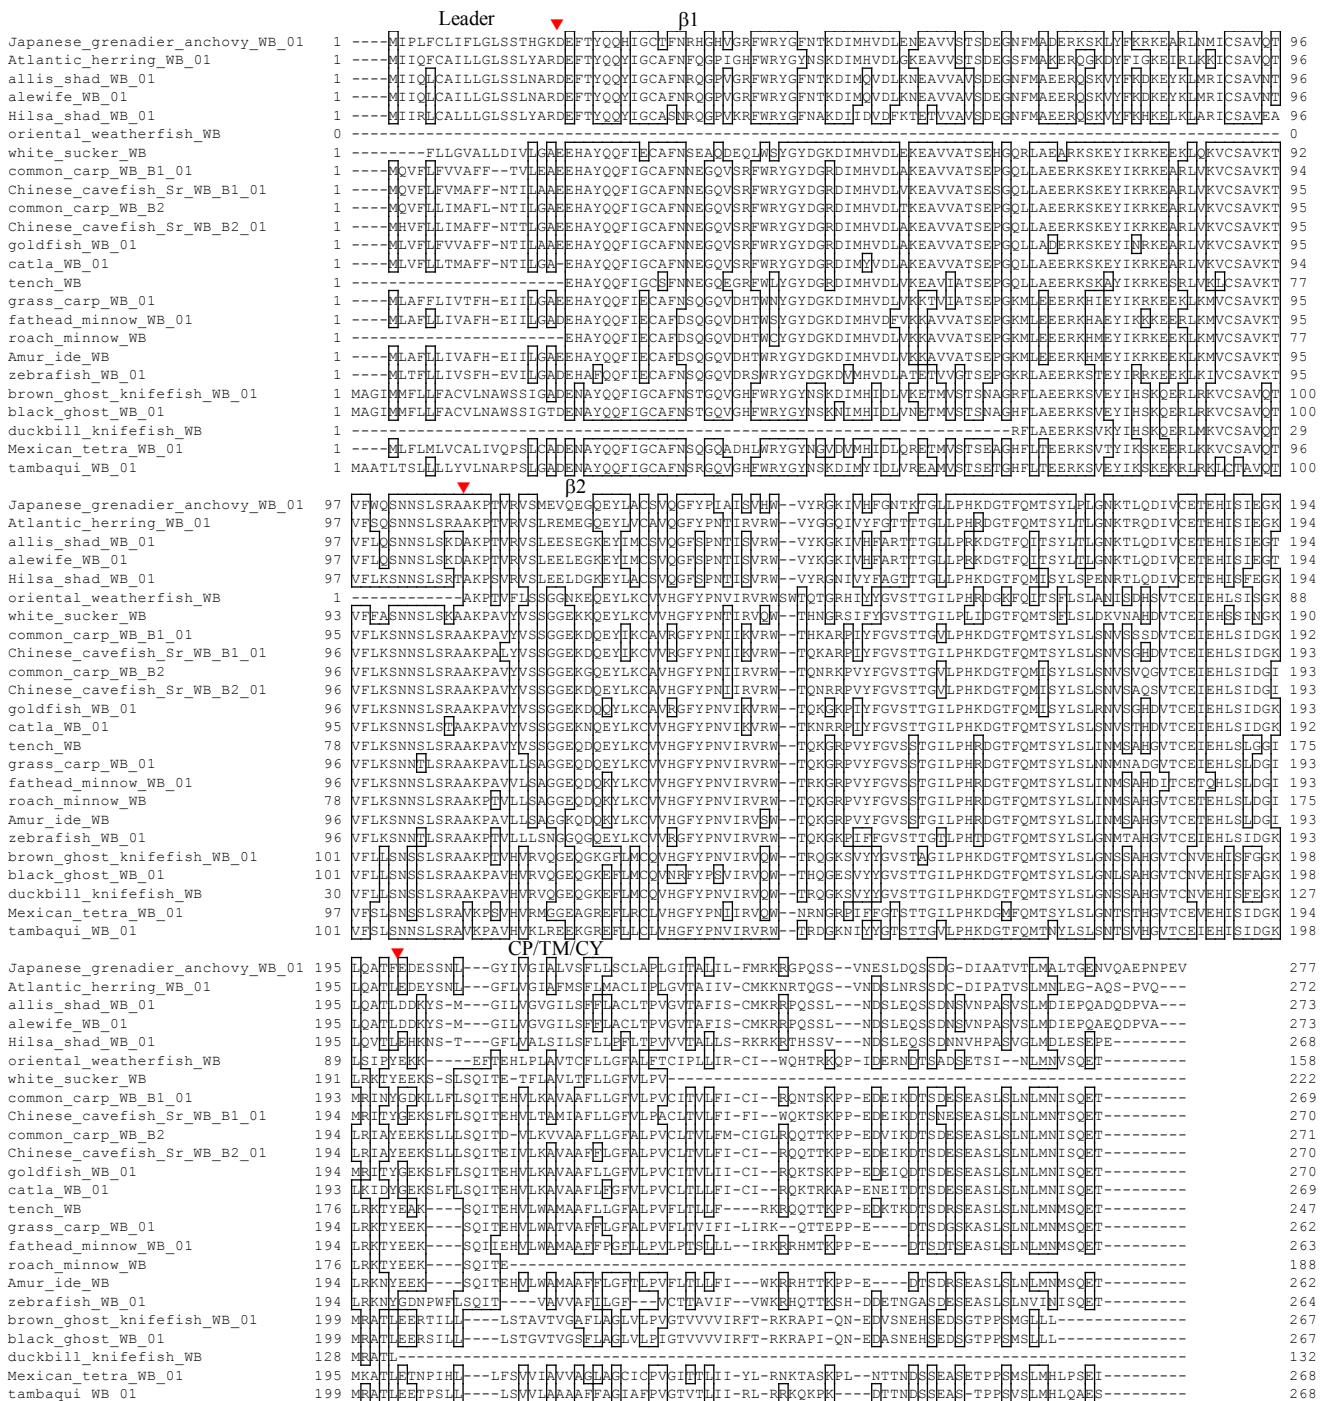

**Fig. S2**

**E Lobe-finned fish WB\_1 and WB\_2**

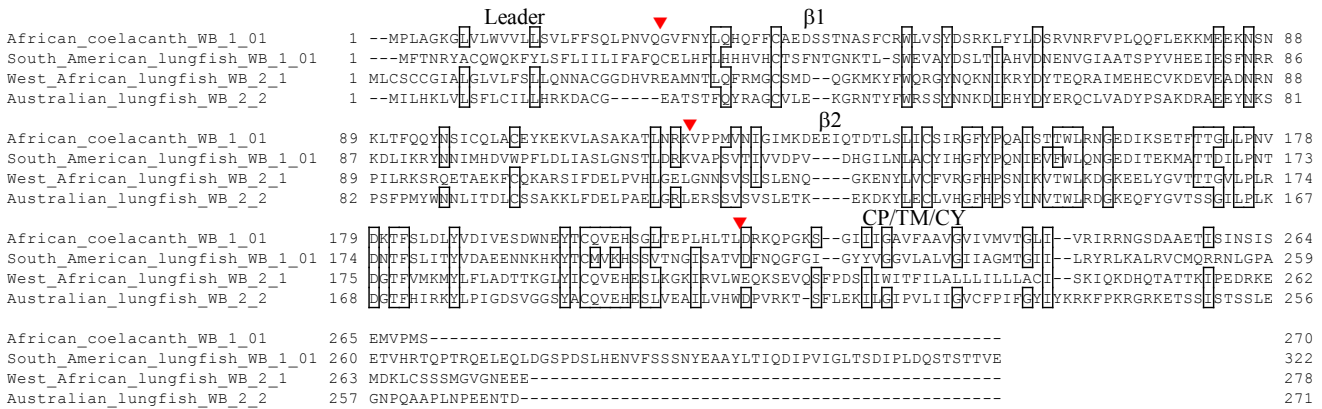

**F Salamander WB**

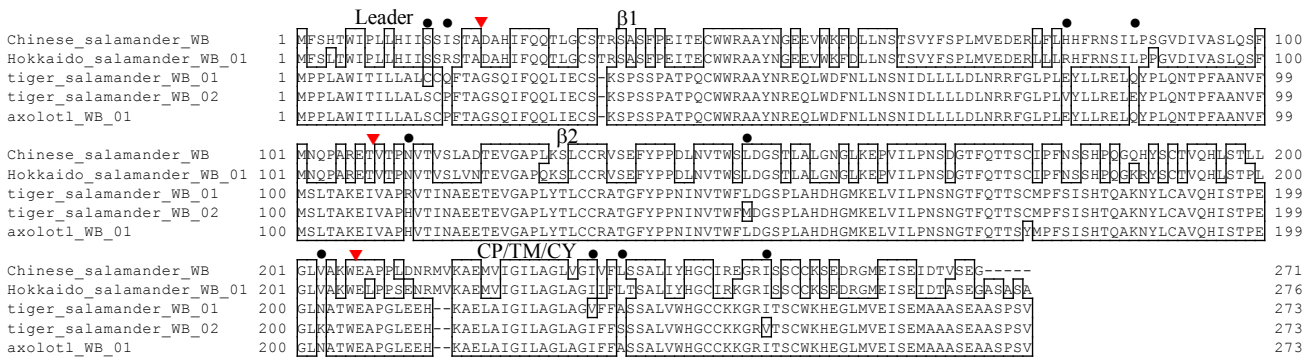

**Fig. S2. Representative W-category  $\beta$  chain (WB) sequences from cartilaginous fish, teleost fish, lobe-finned fish and salamanders.**

**A**, banded houndshark WB\_DS1 and closely-related sequences of other cartilaginous fish. The positions where the two banded houndshark WB\_DS1 sequences (presumable alleles) show disparity are shown by filled circles above the sequences. The additional twenty-two residues in the last part of zebra bullhead shark WB\_DS1-like are not included. **B**, banded houndshark WB\_DS3 and closely-related sequences of other cartilaginous fish. The positions where the two banded houndshark WB\_DS3 sequences (found in different individuals) show disparity are shown by filled circles above the sequences. **C**, cloudy catshark, great white shark and zebra bullhead shark WB\_Nds5L sequences. **D**, WB sequences of teleost fish. Information of the oriental weatherfish and white sucker WB sequences is currently incomplete. **E**, WB sequences of lobe-finned fish including African coelacanth and three kinds of lungfish. **F**, WB sequences of salamanders. The positions where the two tiger salamander WB sequences (obtained from a single individual and presumable alleles) show disparity are shown by black circles above the sequences. Information on the last residues of the Chinese salamander WB sequence is currently incomplete.

The borders of the corresponding exons are shown by red arrowheads. Additional borders within the CP/TM/CY region are shown by open arrowheads. All sequences used in this figure are listed in Table S3 and composite sequences are described in *SI Appendix*.

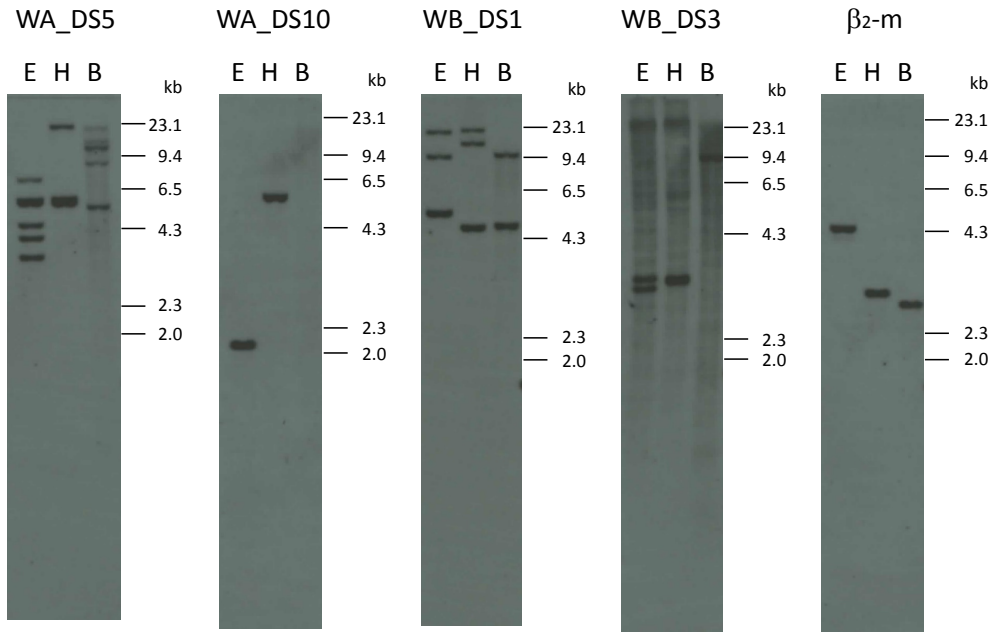

**Fig. S3. Southern blot analyses for the banded houndshark *W*-category and  $\beta_2$ -m genes.** Banded houndshark genomic DNA was digested with either *Eco*RI (E), *Hind*III (H) or *Bam*HI (B) as described in the Materials and Methods. The primer sequences for the probes in the analyses are listed in Table S2. Clearly-positive bands could not be observed in *Bam*HI-digests probed with *WA\_DS10* in several independent experiments. Background bands in the blot of *WB\_DS3* were not observed in other independent experiments (e. g., Fig. S10). Agarose gels of 1.2 % were used.

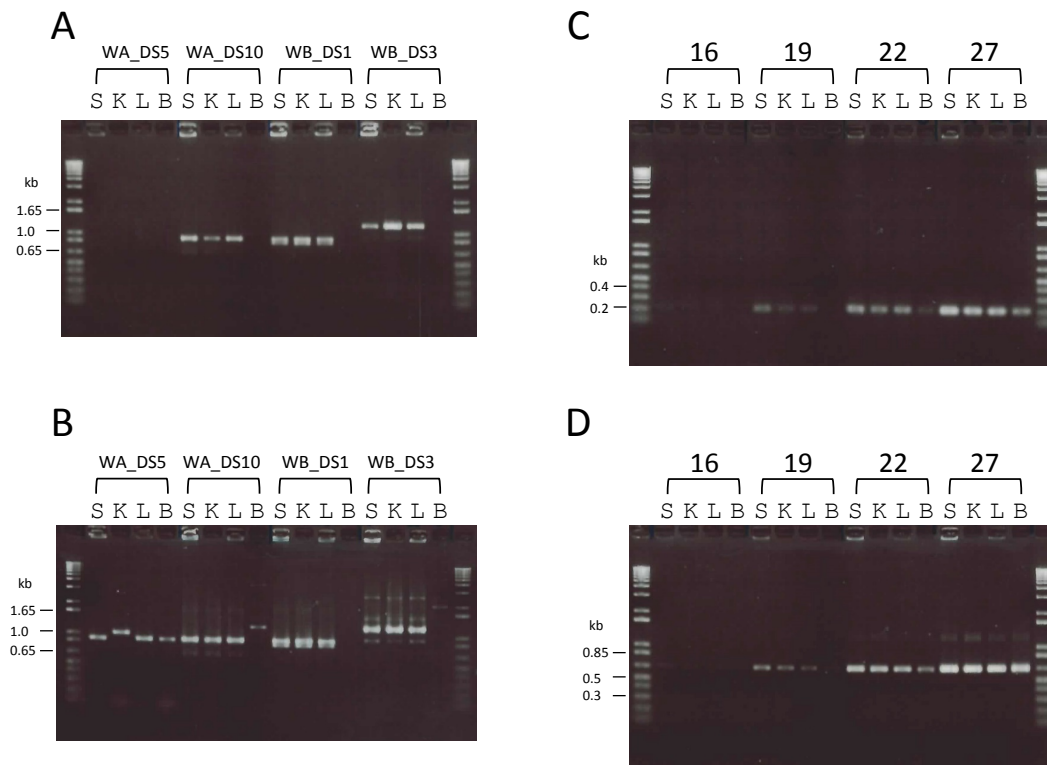

**Fig. S4. Expression of various WA and WB genes of a banded houndshark individual (N1).**

**A**, Amplification of various W-category genes with 32 cycles of RT-PCR. S, K, L and B are abbreviations of spleen, kidney, liver and blood, respectively. Using RNA of spleen, kidney and liver, cDNA fragments of expected lengths were amplified in case of *WA\_DS10*, *WB\_DS1* and *WB\_DS3*. The primers used are described in Table S2. The primers for *WA\_DS5* used in this experiment did not discriminate among *WA\_DS5\_n1~n4*. **B**, Amplification of various W-category genes with 42 cycles of RT-PCR. Compared to the results of 32 cycles in A, some irrelevant bands became apparent and the amount of amplified cDNA of *WA\_DS5* increased. In the amplified products of *WA\_DS5* using the kidney sample (K), a fragment with a length longer than expected was noticed. Sequencing of this fragment revealed it to be an alternatively spliced product which includes an extra region found in the intron 1 of *WA\_DS5* gene and produces a frame-shift in the open reading frame. In a separate experiment, using a different RT-PCR protocol (protocol No. 2) described in the Materials and Methods, we could amplify cDNA fragments of *WA\_DS5* with lengths expected from canonical type sequences using the same kidney sample. cDNA fragments with lengths longer than expected in case of *WA\_DS10* with blood sample (B) have not been investigated yet. **C**, RT-PCR amplification of  $\beta$ -actin cDNA (a short fragment) with various cycles (16, 19, 22 and 27 cycles as indicated on top). **D**, RT-PCR amplification of  $\beta$ -actin cDNA (a longer fragment) with various cycles (16, 19, 22 and 27 cycles as indicated on top). With more PCR cycles, the number of irrelevant bands increased. The primers used for C and D are listed in Table S2. Agarose gels of 1.5 % were used for all experiments in this figure.

Fig. S5

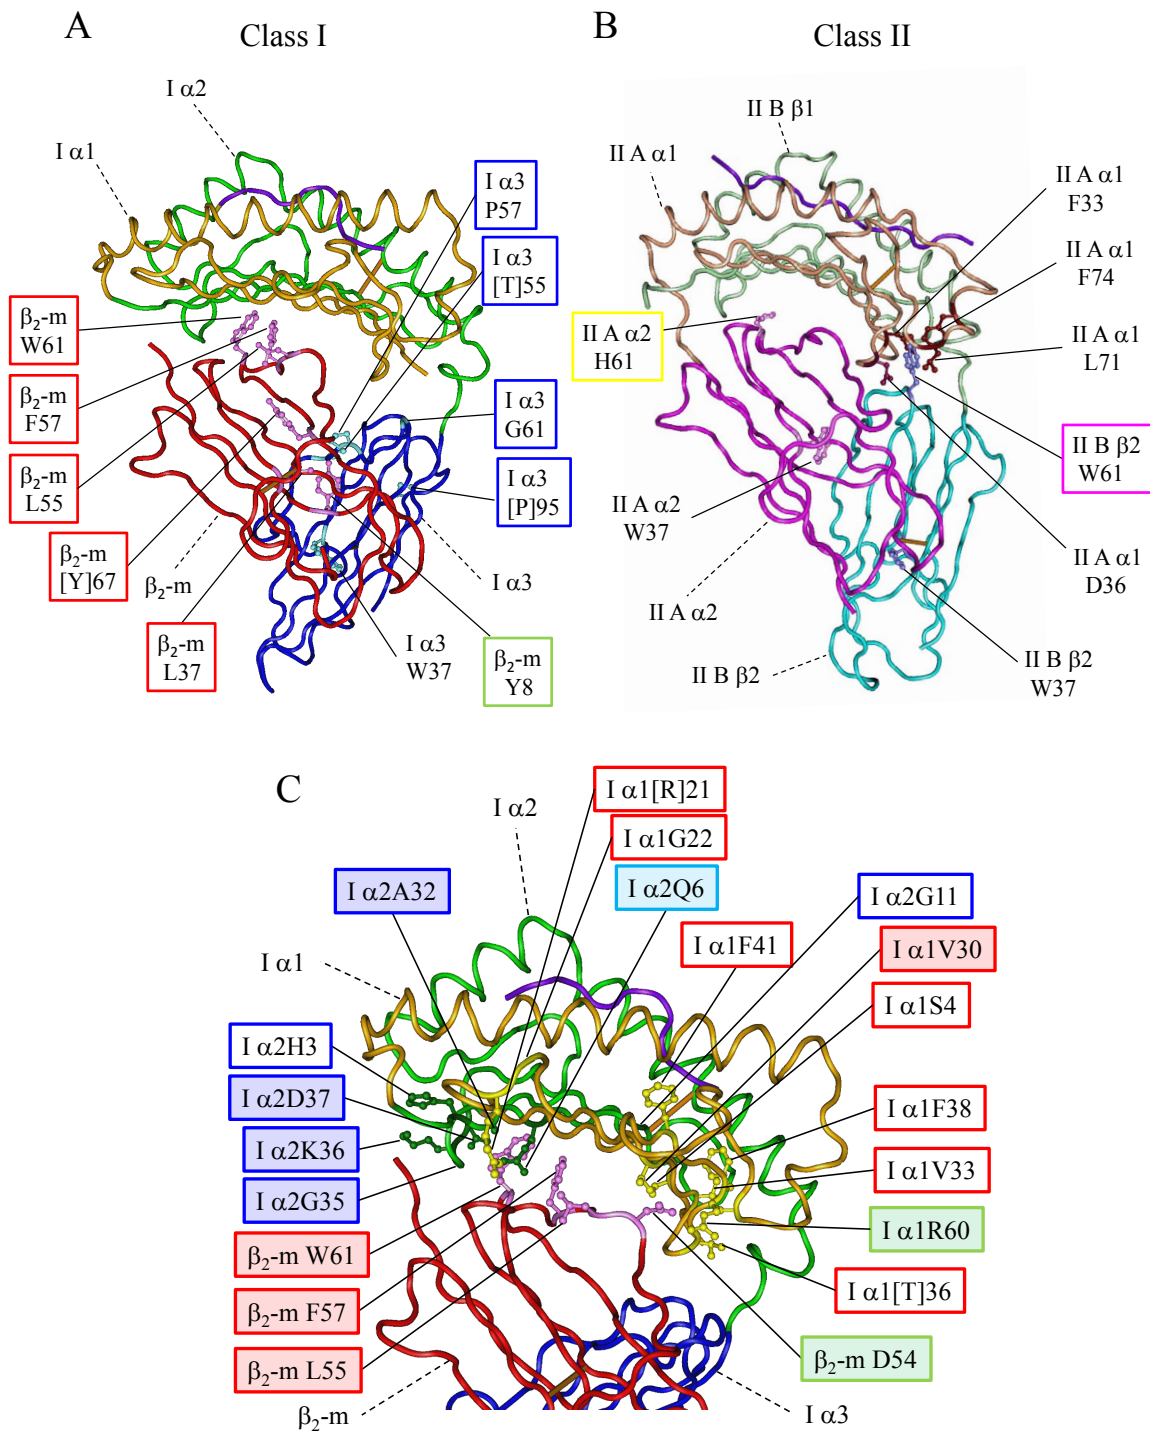

**Fig. S5. The structural positions of amino acid residues which are shared between W-category and class I molecules.**

In A, an overall structure of an MHC class I molecule, HLA-A2, is shown. The positions of amino acid residues often shared between W-category and class I molecules in the Ig-like domains are indicated. In B, an overall structure of an MHC class II molecule, HLA-DR1, is shown for comparison. In C, the interface between  $\beta_2$ -m and the membrane-distal domains of HLA-A2 is shown highlighting positions of several residues shared between W-category and class I molecules.

**A**, Five amino acid positions of  $\beta_2$ -m (with red frames) and four positions of the class I  $\alpha 3$  domain (with blue frames) highlighted in Fig. 3 with red and blue shadings, respectively, are indicated. The residues in brackets are different from those shared between W-category and other class I molecules. In the figure, the position of I  $\alpha 3$ W37, which corresponds to the highly conserved tryptophan in the Ig superfamily and is indicated with an open square in Fig. 3, is shown. The position of  $\beta_2$ -m Y8 (with a light green frame), which interacts with I  $\alpha 3$ P57 (Fig. S6), is also shown.

**B**, Two amino acid positions, H61 of the class IIA  $\alpha 2$  domain (IIA  $\alpha 2$ H61, with a yellow frame) and IIB  $\beta 2$ W61 (with a magenta frame), are indicated. These residues possess the same position 61 in the sequence alignment (Fig. 3) and correspond to  $\beta_2$ -m W61 and I  $\alpha 3$ G61 (shown in A), respectively. IIA  $\alpha 2$ H61 is not conserved among classical MHC class II molecules. Highly conserved IIB  $\beta 2$ W61 forms a hydrogen bond with the main chain carbonyl oxygen of IIA  $\alpha 1$ E37 and further interacts with the three conserved hydrophobic amino acid residues of the class II  $\alpha 1$  domain (IIA  $\alpha 1$ F33, IIA  $\alpha 1$ L71 and IIA  $\alpha 1$ F74) (31) as shown. In the figure, the positions of IIA  $\alpha 2$ W37 and IIB  $\beta 2$ W37, which correspond to the highly conserved tryptophan in the Ig superfamily and is indicated with an open square in Fig. 3, are also shown.

**C**, The positions of amino acid residues frequently shared between W-category and class I molecules but not shared with the classical class II molecule at the interface between the membrane-distal and the membrane-proximal domains of HLA-A2. These comprise eight positions of the class I  $\alpha 1$  domain (with red frames) and six positions of the class I  $\alpha 2$  domain (with blue frames). I  $\alpha 2$ Q6 (with light blue frame), I  $\alpha 1$ R60 and  $\beta_2$ -m D54 (both with light green frames) are also indicated, although these can be observed in the corresponding positions of some classical class II molecules (Datasets S1 and S2). A glutamine corresponding to I  $\alpha 2$ Q6 is highly conserved in WB  $\beta 1$  domains, and an arginine corresponding to I  $\alpha 1$ R60 plus an aspartic acid corresponding to  $\beta_2$ -m D54 can be found in teleost fish and lungfish WA.  $\beta_2$ -m L55,  $\beta_2$ -m F57 and  $\beta_2$ -m W61, three residues of  $\beta_2$ -m at the interface shared between W-category and class I molecules are also indicated.

Additional explanations for this figure are described in the section 11 of *SI Appendix*.



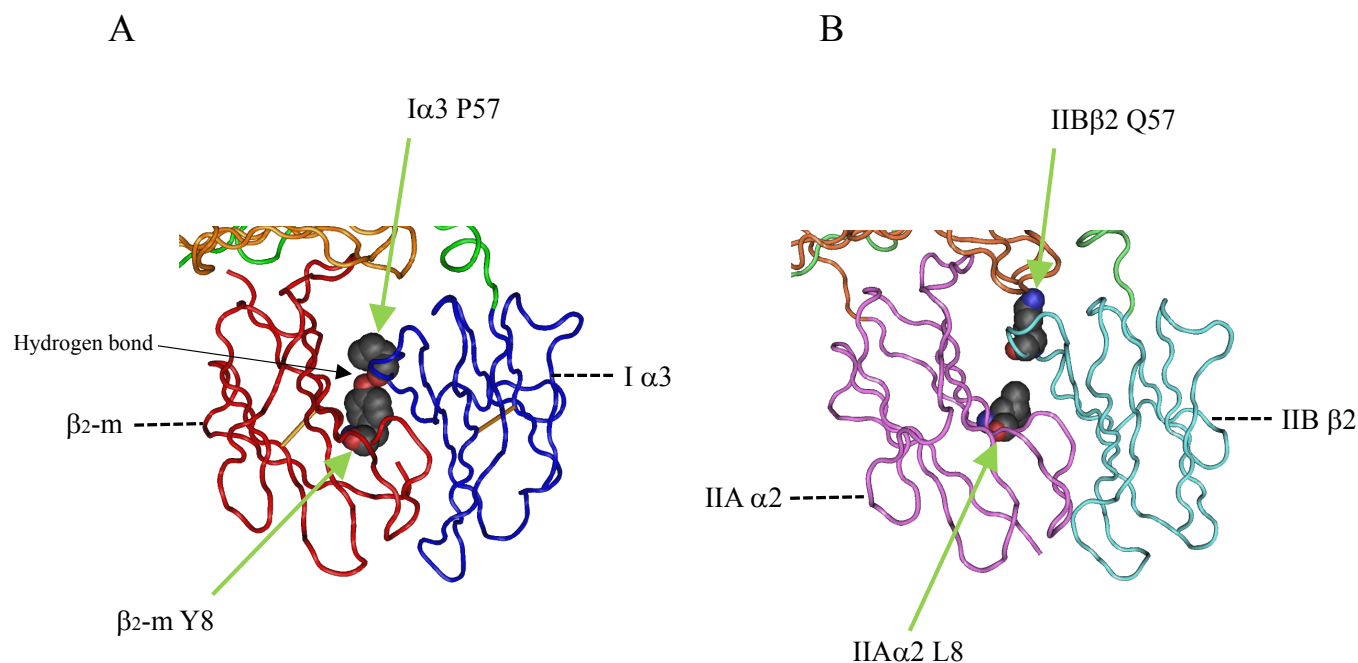

**Fig. S6. MHC class I  $\alpha 3$  domain P57 interacts with Y8 of  $\beta_2$ -m.**

**A.** The main chain carbonyl oxygen of MHC class I  $\alpha 3$  P57 interacts with a hydrogen atom of a hydroxyl group of  $\beta_2$ -m Y8 through a hydrogen bond (29).

**B.** The residues of the classical MHC class II molecule whose positions are corresponding to class I  $\alpha 3$  P57 and Y8 of  $\beta_2$ -m are shown.

HLA-A2 (PDB ID: 1QSF) and HLA-DR1 (PDB ID: 1DLH) were used for MHC class I and class II molecules, respectively. The relevant amino acid residues with their side- and main-chains are presented using the space-filling model representation. Oxygen: red, nitrogen: blue, and carbon: black.

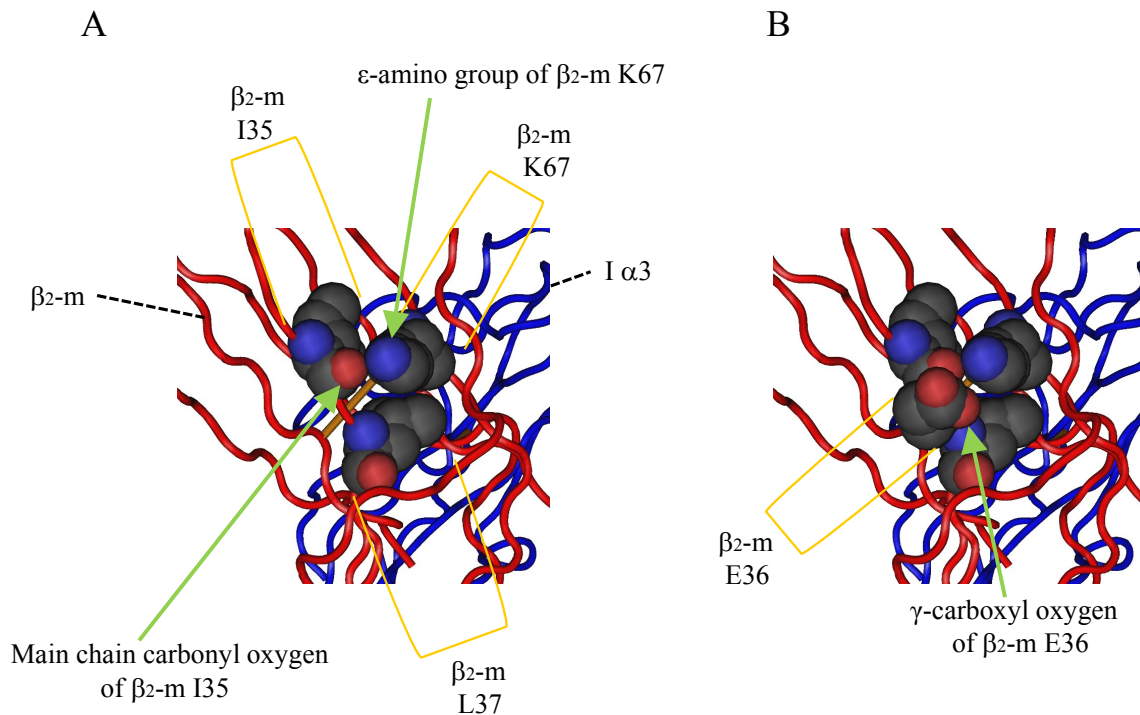

**Fig. S7.  $\beta_2$ -m K67 can form intra-domain hydrogen bonds.**

**A**, A structural drawing centered on grass carp  $\beta_2$ -m K67 is shown. A hydrogen atom from  $\epsilon$ -amino group of grass carp  $\beta_2$ -m K67 forms a hydrogen bond with a main chain carbonyl oxygen of  $\beta_2$ -m I35 (69). The  $\epsilon$ -amino group of grass carp  $\beta_2$ -m K67 and the main chain carbonyl oxygen of  $\beta_2$ -m I35 are indicated with green arrows. In addition to  $\beta_2$ -m K67 and  $\beta_2$ -m I35,  $\beta_2$ -m L37 whose sequence position is corresponding to that of the conserved W37 of the Ig-superfamily, is also shown. The relevant three amino acid residues with their side- and main-chains are shown as the space-filling model and their approximate locations are indicated with yellow brackets.  $\beta_2$ -m (red) and class I  $\alpha 3$  domain (blue) are indicated. **B**, The same structure from the same angle as shown in A, but also showing the space-filling model of  $\beta_2$ -m E36 (indicated with a yellow bracket).  $\beta_2$ -m K67 forms a hydrogen bond to a  $\gamma$ -carboxyl oxygen of  $\beta_2$ -m E36 (69).

Grass carp class I molecule (PDB ID: 5Y91) was used for the drawing. Oxygen: red, nitrogen: blue, and carbon: black.

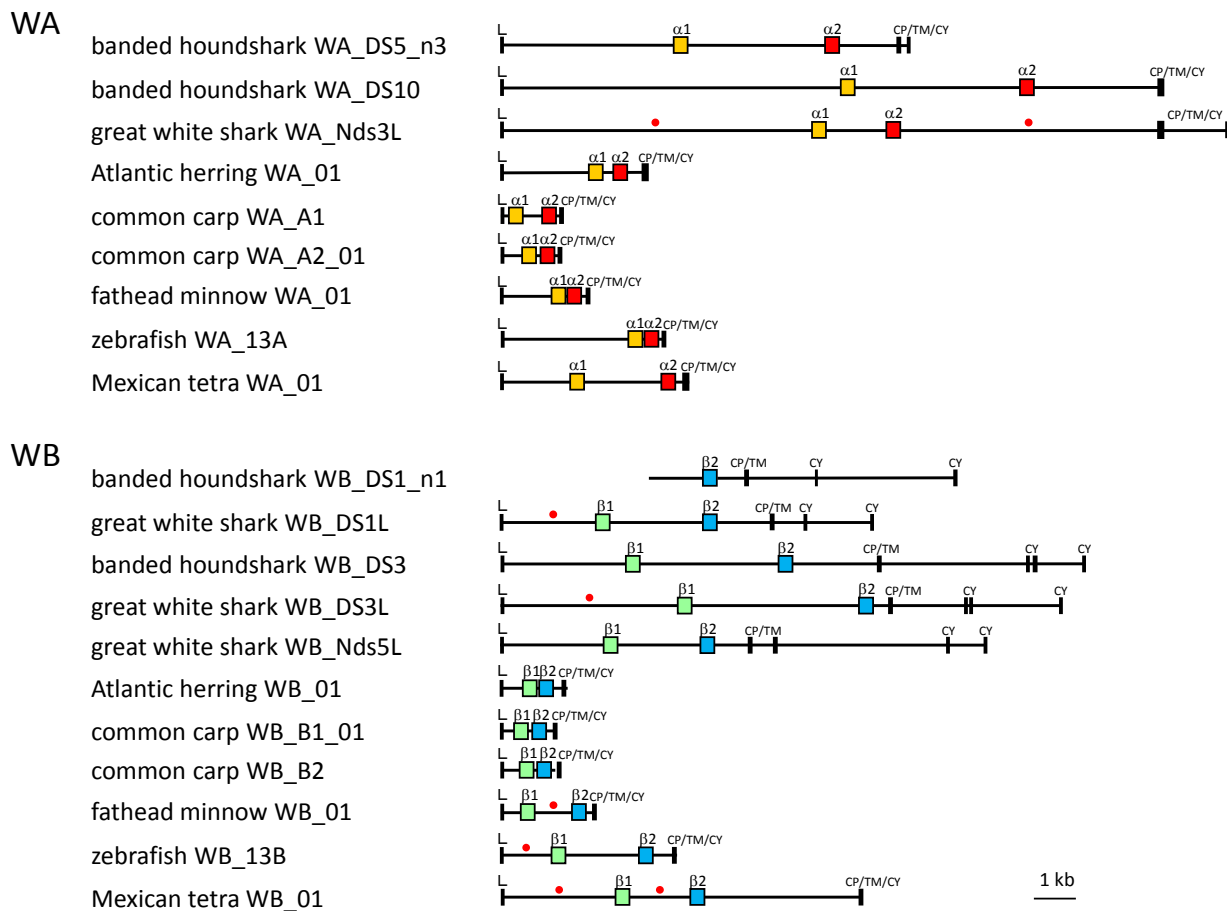

**Fig. S8. The genomic structures of additional W-category genes with class II domain architectures.** The genomic structures of coding exons and introns of additional *WA* and *WB* genes are shown. The genomic sequence of banded houndshark *WB\_DS1\_n1* was partially determined and its 5' side has not yet been clarified. The genomic sequence of banded houndshark *WB\_DS3* was determined using two parts which contain the first four and the last three exons, respectively. Colored boxes are explained in the legend to Fig. 5. Within some intron sequences, undetermined regions in the database information exist and those introns are indicated by red filled circles.

Fig. S9

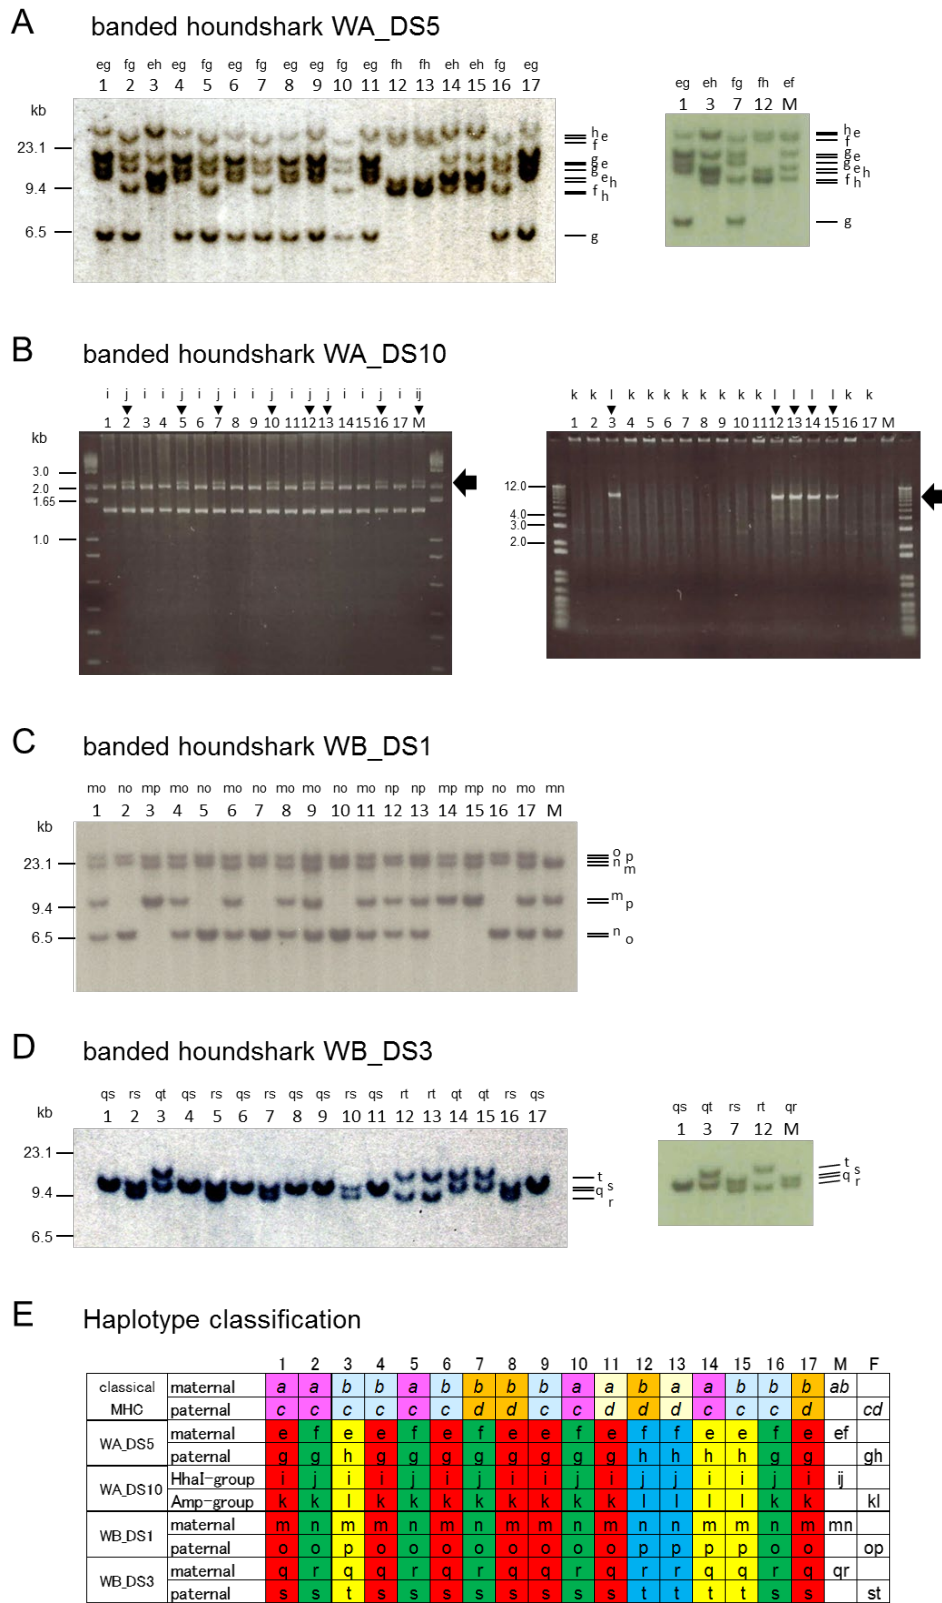

**Fig. S9. All four investigated types of banded houndshark W-category genes belong to the same linkage group.** Panel A, C and D show Southern blots for linkage analyses of DNA samples from seventeen littermates and their mother using *WA\_DS5*, *WB\_DS1* and *WB\_DS3* probes, respectively. Panel B shows PCR amplification of *WA\_DS10* for linkage analyses because of a limitation of the shark DNA samples. Panel E shows the summary of the linkage analyses.

**A**, Southern blot analysis using banded houndshark *WA\_DS5* as probe. Left: Positive bands of seventeen littermates exhibit four patterns, which are shown with the represented haplotype symbol combination (e-h, indicated on top) with lane numbers as follows: (1, 4, 6, 8, 9, 11, 17; eg), (2, 5, 7, 10, 16; fg), (3, 14, 15; eh) and (12, 13; fh). Based on similar arguments as in the previous studies (17, 33), these four patterns could represent four distinct haplotype patterns produced by total of four different haplotypes of their parents (maternal, e and f; paternal, g and h) through Mendelian inheritance. Positive bands were assigned to one of the haplotypes (indicated on the right), in some cases with difficulties because of limited resolution. The DNA lengths of the size markers in kilo-bases (kb) are indicated on the left side. Right: Southern blot analysis of mothers's DNA along with representative littermates. The experiment described in the left picture did not contain mother's DNA.

**B**, PCR amplification of banded houndshark *WA\_DS10*. Left: DNA fragments amplified from the seventeen littermates and their mother's DNA with two primers (forward: HhaI-group F1, reverse: HhaI-group R1 described in Table S2) were digested with the restriction enzyme *HhaI* and the products analyzed with agarose gel (3 %) electrophoresis. All samples with an additional band (as indicated with an arrow on the right hand side) are indicated by arrowheads (on top). The seventeen littermates could be classified into two groups; an HhaI-group "i" and an HhaI-group "j" with the latter showing an additional band. Right: DNA fragments amplified from seventeen littermates and their mother's DNA with two primers (forward: Amp-group F1, reverse: Amp-group R1), analyzed with agarose gel (1 %) electrophoresis. All samples with amplification of DNA fragments of approximately 8 kb in size (as indicated with an arrow on the right hand side) are indicated by arrowheads (on top). The seventeen littermates could be classified into two groups; an Amp-group "k" and an Amp-group "l" with the latter showing an 8 kb band. Variations observed in the results of the left and right experiments are considered to represent haplotype variations. Combining these results indicates four patterns, shown with the represented group (haplotype) symbol combinations along with lane numbers as follows: (1, 4, 6, 8, 9, 11, 17; ik), (2, 5, 7, 10, 16; jk), (3, 14, 15; il) and (12, 13; jl).

**C**, Southern blot analysis using banded houndshark *WB\_DS1* as probe. Like in A, positive bands of seventeen littermates exhibit four patterns, which are shown with the represented haplotype symbol combination with lane numbers as follows: (1, 4, 6, 8, 9, 11, 17; mo), (2, 5, 7, 10, 16; no), (3, 14, 15; mp) and (12, 13; np).

**D**, Southern blot analysis using banded houndshark *WB\_DS3* as probe. Like in A, positive bands of seventeen littermates exhibit four patterns, which are shown with the represented haplotype symbol combination with lane numbers as follows: (1, 4, 6, 8, 9, 11, 17; qs), (2, 5, 7, 10, 16; rs), (3, 14, 15; qt) and (12, 13; rt).

**E**, Summary of the haplotype classification of W-category and classical MHC genes. The number of the banded houndshark individual littermate, mother (M) and father (F) are shown on top. In the first row, previously published haplotype classifications of classical MHC genes (17, 33) are shown with four different colors (purple, light blue, orange and pale yellow). In the following rows, haplotype classifications of banded houndshark *W-category* genes are shown in addition to the deduced haplotype of the father. Identical patterns are observed for *WA\_DS5*, *WA\_DS10*, *WB\_DS1* and *WB\_DS3* as shown with four different colors (red, green, yellow and blue). This indicates that in banded houndshark all four investigated types of W-category genes belong to the same linkage group. The distribution of the four W-category haplotypes (red, green, yellow and blue) over the littermates is completely different from the distribution of the classical MHC genes haplotypes (purple, light blue, orange and pale yellow), indicating that the four investigated W-category genes are not linked with the classical MHC genes. Linkage analysis of banded houndshark  $\beta_2$ -m gene was conducted

separately and shown to be linked with the classical MHC genes (*SI Appendix* and Fig. S15) as also reported for another shark species (28).

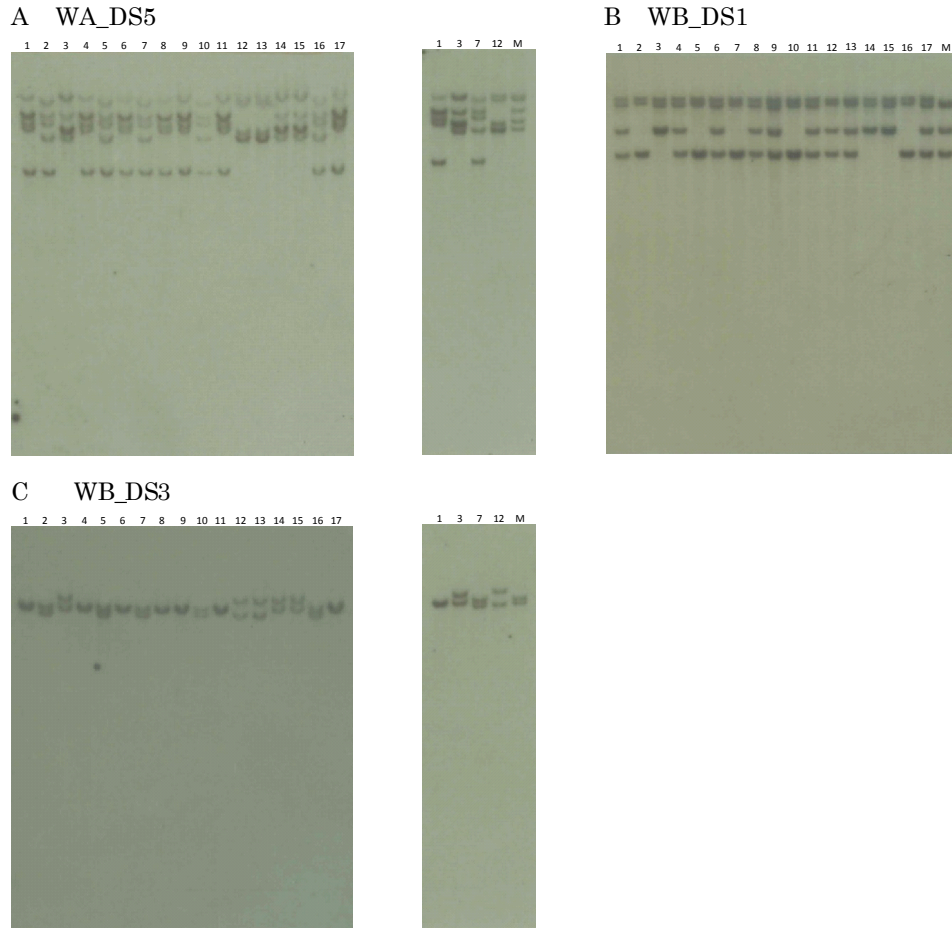

**Fig. S10. Full pictures of the Southern blots used for linkage analyses in Fig. S9.**

**A**, probe: banded houndshark *WA\_DS5*, **B**, probe: banded houndshark *WB\_DS1*, **C**, probe: banded houndshark *WB\_DS3*. The numbers indicate individual sharks and “M” indicates their mother as in Fig. S9. There are no positive bands in the blots other than those shown in Fig. S9. Agarose gels of 0.8 % were used.

**Fig. S11**

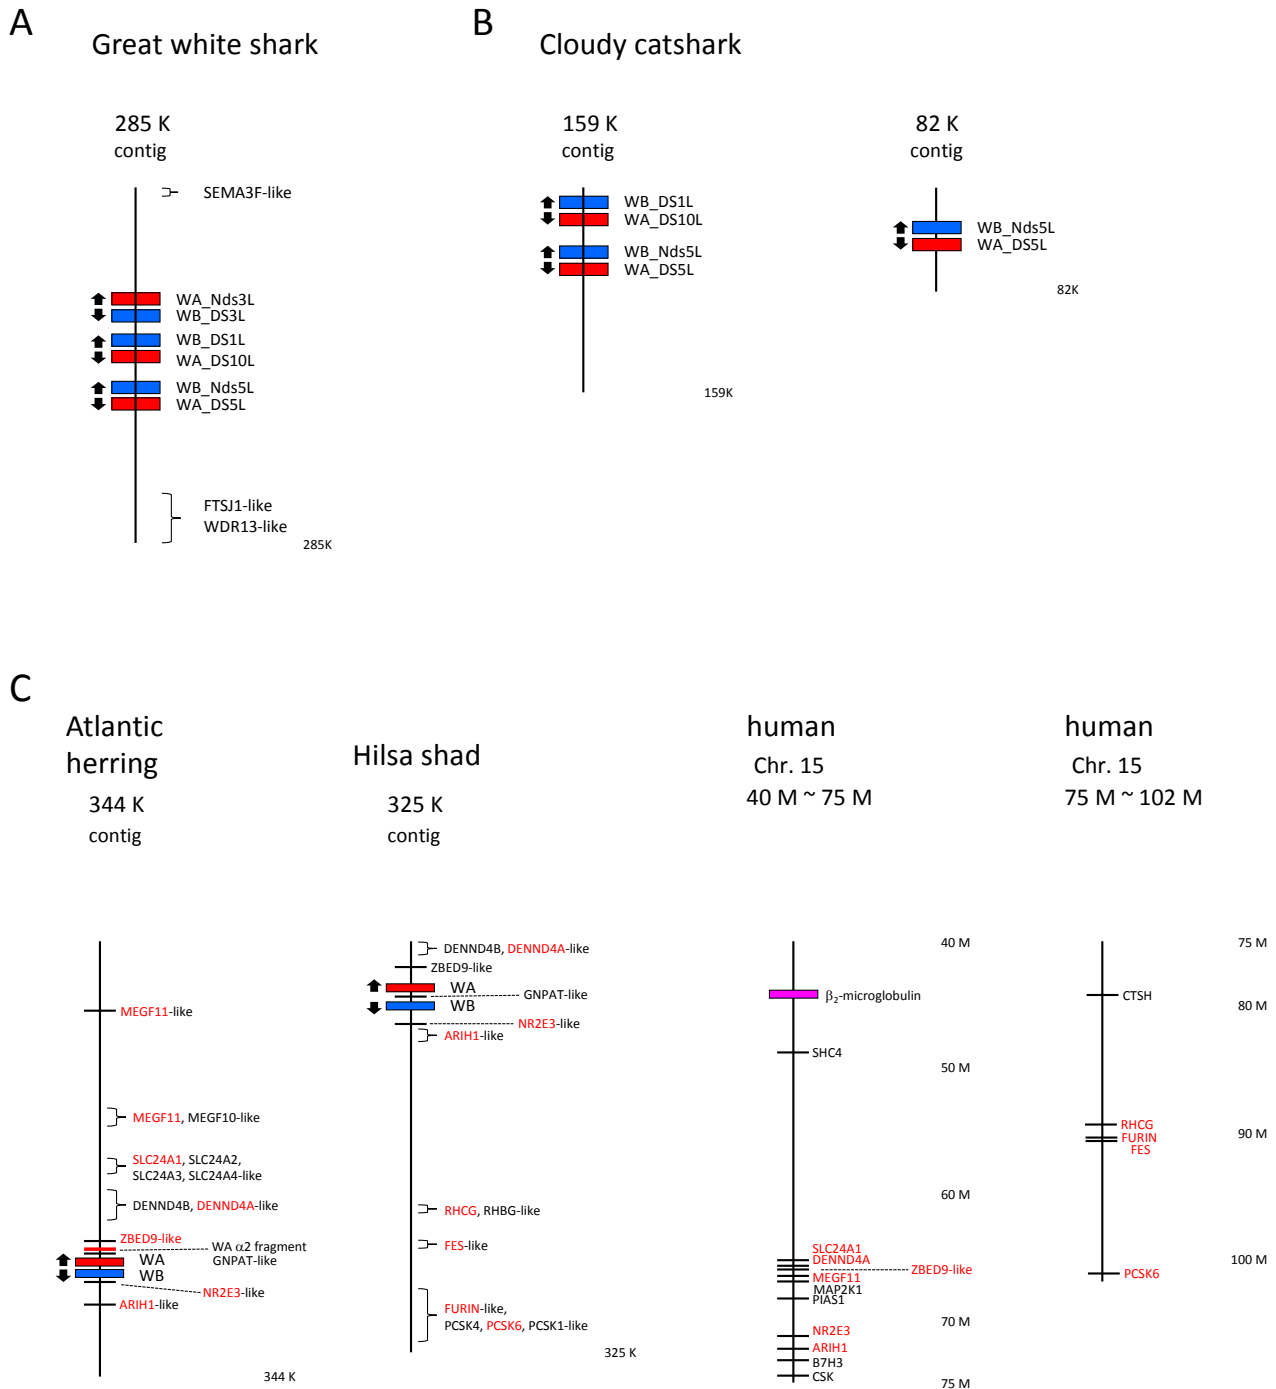



Fig. S11

D

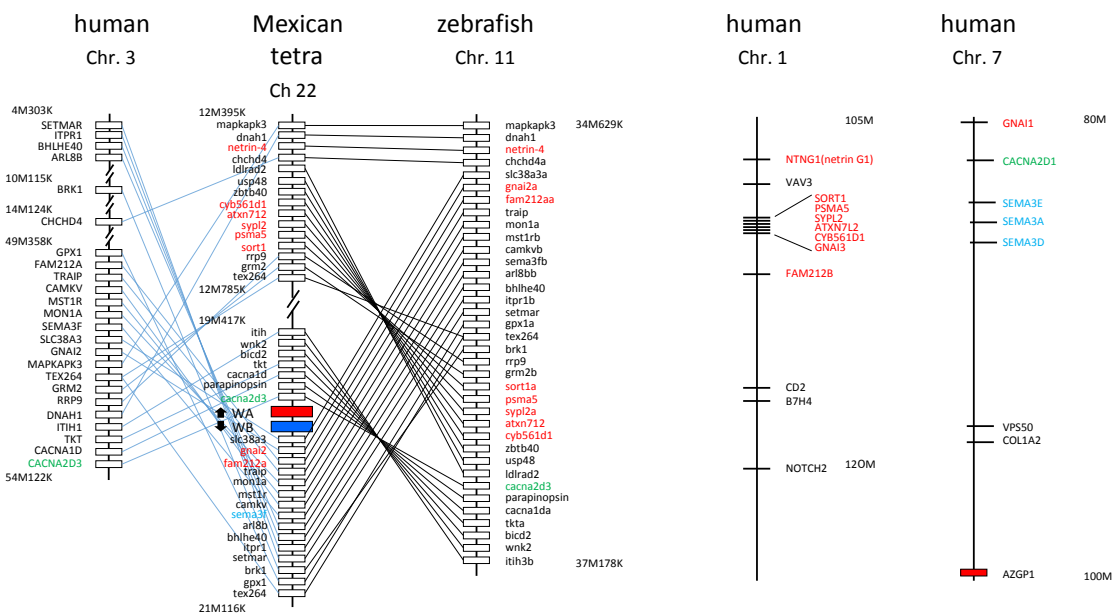

E

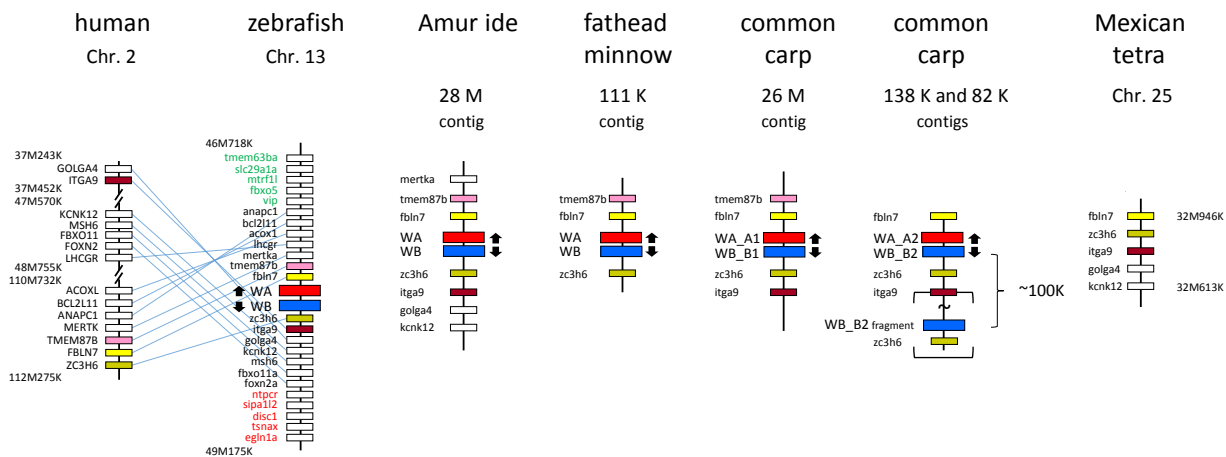

Fig. S11

F

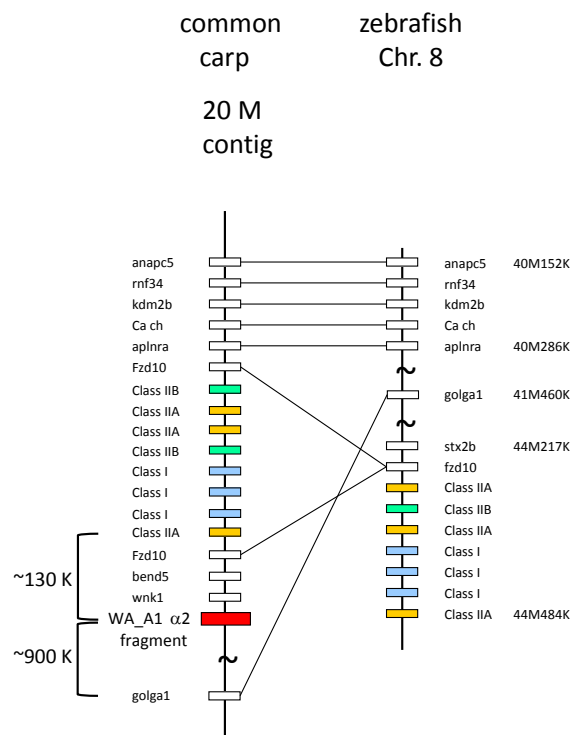

**Fig. S11. Genomic locations of W-category genes of cartilaginous fish and of teleost fish.**

**A,** Great white shark 285 K contig containing three *WA* (red) and three *WB* (blue) genes. There are three *WA/WB* pairs with head-to-head configurations, although the pairing remains to be studied at the protein level. The three pairs are: *WA\_Nds3L/WB\_DS3L*, *WA\_DS10L/WB\_DS1L*, and *WA\_DS5L/WB\_Nds5L*. In the same contig, in addition to the *WA* and *WB* genes, some gene fragment sequences were identified in the surrounding regions of *WA/WB* genes as described below.

*SEMA3F*-like sequence (~144 bp), corresponding to the coding sixteenth exon (total 19 exons) sequence of human *SEMA3F* (chromosome 3p21.31, 50 M 155 K) transcript variant 1 (NM\_004186). A blast search of the Mexican tetra genome with this *SEMA3F*-like sequence revealed the *sema3f* gene situated near the W-category genes (see D) as the top match.

*FTSJI*-like sequences of ~69 bp and ~93 bp corresponding to the fourth and the eleventh coding exon sequences, respectively, of human *FTSJI* (chromosome Xp11.23, 48 M 476 K) transcript variant 1 (NM\_012280).

*WDR13*-like sequences (length: ~94 to ~316 bp with mixed orientations) corresponding to six coding exon sequences including the exons 4 and 6-10 of human *WDR13* (chromosome Xp11.23, 48 M 590 K) transcript variant 4 (NM\_001347217). The closest relative of human *WDR13* gene, *WDR5*, is present at the human chromosome 9q34.2 that was previously regarded as an *Mhc* paralogous region (87, 88). *WDR5B*, a sequence homologous to *WDR5*, is located on human chromosome 1 (~122 M) close to the *CASR* gene (see the axolotl W-category contig; Fig. S12B) and close to other *Mhc* region-related genes.

**B,** Cloudy catshark 159 K and 82 K contigs containing *WA* (red) and *WB* (blue) genes. The order of the genes is the same as that of great white shark in A. *WA\_DS5L/WB\_Nds5L* gene pairs of the two contigs are distinct from each other (*SI Appendix*).

**C,** Atlantic herring 344 K contig and Hilsa shad 325 K contig containing *WA* (red) and *WB* (blue) genes.

Genes which are homologous to the sequences (depicted with red color) in the surrounding regions of the *WA/WB* gene pair in these contigs can be found in the human chromosome 15 (shown on the right), which is closely related to the *Mhc* region (28, 87, 88) and where the  $\beta_2$ -microglobulin ( $\beta_2$ -m) gene and many other *Mhc* related genes are present. Some selected sequences in the surrounding regions of the *WA/WB* gene pair and their homologies with the human genes are described below.

In the Atlantic herring 344 K contig:

*MEGF11*-like sequences correspond to a part of the coding sixth exon of human *MEGF11* (chromosome 15q22.31, 66 M 253 K) mRNA sequence (NM\_032445) with 73 % identity (176/240), to a part of the coding twenty-second exon with 86 % identity (95/110), and to a part of the coding eighth and ninth exons with 83 % identity (87/105). These sequences also show similarity to a part of human *MEGF10* gene (chromosome 5q23.2, 127 M 229 K).

A *SLC24A1*-like sequence corresponds to a part of the coding fourth exon of human *SLC24A1* (chromosome 15q22.31, 65 M 611 K) transcript variant 5 (NM\_001301033.2) with 77 % identity (414/539). Another *SLC24A1*-like sequence corresponds to the coding tenth exon with 84 % identity (148/177). These sequences also show similarity with a part of human *SLC24A2* (chromosome 9p22.1-p21.3), *SLC24A3* (chromosome 20p11.23) and *SLC24A4* (chromosome 14q32.12) sequences.

In both Atlantic herring and Hilsa shad contigs (described using the results of Atlantic herring):

*DENND4B*-like sequence stretch corresponds to a part of the coding sixth exon of human *DENND4B* (chromosome 1q21.3, 153 M 946 K) transcript variant 2 (NM\_001367466) with 84 % identity (118/140 or 108/129), to the coding twelfth exon with 76 % identity (139/184), to the coding seventeenth and eighteenth exon with 72 % identity (156/217), and to the coding twenty-fourth exon with 76 % identity (108/142).

Some *DENND4B*-like sequences are also *DENND4A*-like, and *DENND4A*-like sequences correspond to various portions of human *DENND4A* (chromosome 15q22.31, 65 M 792 K).

*ZBED9*-like sequence corresponds to the non-coding sequence of human *ZBED9* (chromosome 6p22.1, 28M 616K, in the *Mhc* region) transcript variant X2 mRNA sequence (XM\_011514285) with 90 % identity (65/72). A blastn search of the human genome with the Atlantic herring *ZBED9*-like noncoding 72 bases revealed the sequences of chromosome 6, 15 and 17 as the top matches: chromosome 6, 18 M 836 K, 27 M 519 K, 28 M 941 K; chromosome 15, 65 M 869 K; chromosome 17, 8 M 119 K. On human chromosome 6, the locations of some MHC class I genes are as follows: HFE (26 M 87 K), HLA-F (29 M 723 K), HLA-G (29 M 826 K), HLA-A (29 M 942 K), HLA-E (30 M 489 K), HLA-C (31 M 272 K), HLA-B (31 M 357 K), MICA (31 M 400 K), MICB (31 M 494 K). The location of the homologous sequence of *ZBED9*-like noncoding sequence on human chromosome 15 (65 M 869 K) is indicated in the figure.

*GNPAT*-like sequence corresponds to the coding seventh exon of human *GNPAT* (chromosome 1q42.2, 231 M 241 K) transcript variant 1 mRNA sequence with 69 % identity (88/127). Near the W-category genes of zebrafish, fourteen genes that are homologous to the genes found in the human chromosome 1 (~231 M) exist.

A *NR2E3*-like sequence corresponds to the coding second exon of human *NR2E3* (chromosome 15q23, 71 M 810 K) transcript variant 1 mRNA sequence (NM\_016346) with 82 % identity (106/129). Another *NR2E3*-like sequence corresponds to a part of the coding fifth exon with 90 % identity (77/86).

*ARIHI*-like sequences correspond to the coding tenth exon of human *ARIHI* (chromosome 15q24.1, 72 M 474 K) mRNA sequence (NM\_005744) with 81 % identity (113/139) and to the twelfth exon with 87 % identity (228/263).

In the Hilsa shad 325 K contig:

*RHCG*-like sequences correspond to the coding second exon of human *RHCG* (chromosome 15q26.1, 89 M 496 K) transcript variant 3 mRNA sequence (NM\_001321041) with 88 % identity (137/155), to the coding sixth exon with 79 % identity (97/123), to the coding fifth exon with 74 % identity (120/175), to the coding fourth exon with 73 % identity (108/147), and to the coding seventh exon with 70 % identity (84/120).

Some *RHCG*-like sequences are also *RHBG*-like, and these *RHBG*-like sequences correspond to the coding third exon of human *RHBG* (chromosome 1q22, 156 M 366 K) transcript variant 3 mRNA sequence (NM\_001256396) with 78 % identity (124/159), to the coding fifth exon with 71 % identity (103/146), to a part of the coding sixth exon with 75 % identity (63/84), and to a part of the coding eighth exon with 81 % identity (44/54).

*FES*-like sequences correspond to the coding fifteenth exon of human *FES* (chromosome 15q26.1, 90 M 884 K) transcript variant 4 mRNA sequence (NM\_001143785) with 78 % identity (123/158), to the coding sixteenth exon with 78 % identity (102/131), to the coding thirteenth exon with 83 % identity (81/98), to the coding twelfth exon with 72 % identity (89/124), and to a part of the coding fourteenth exon with 84 % identity (38/45).

*FURIN*-like sequences correspond to the coding ninth exon of human *FURIN* (chromosome 15q26.1, 90 M 868 K) transcript variant 1 mRNA sequence (NM\_002569) with 85 % identity (185/217), to the coding eighth exon with 77 % identity (137/179), to a part of the coding thirteenth exon with 81 % identity (88/108), to the coding tenth exon with 81 % identity (82/101), to the coding fourteenth exon with 81 % identity (80/99), to the coding twelfth exon with 80 % identity (80/100), to the coding sixth exon with 82 % identity (67/82), to the coding seventh exon with 79 % identity (73/92), to the coding fourth exon with 78 % identity (69/89), and to the coding eleventh exon with 74 % identity (79/107).

*PCSK4*-like sequences correspond to the coding eighth exon of human *PCSK4* (chromosome 19p13.3, 1 M 490 K) transcript variant X22 mRNA sequence (XM\_024451556) with 81 % identity (152/188), to the coding seventh exon with 76 % identity (134/176), to a part of the coding twelfth exon with 76 % identity (90/118), and to the coding tenth exon with 74 % identity (72/97). Identification of exons are based on *PCSK4* mRNA sequence (NM\_017573).

Some *PCSK4*-like sequences are also *PCSK6*-like, and these *PCSK6*-like sequences correspond to the coding eighth exon of human *PCSK6* (chromosome 15q26.3, 101 M 489 K) transcript variant 3 mRNA

sequence (NM\_138322) with 77 % identity (137/177), to the coding seventh exon with 77 % identity (115/150), and to the coding fourth exon with 76 % identity (71/94).

**D**, Mexican tetra chromosome 22 containing *WA* (red) and *WB* (blue) genes. The pair of *WA/WB* genes is sandwiched in between *slc38a3* and *cacna1d3* genes.

On human chromosome 3 (shown on the left of the Mexican tetra's), homologous genes for many surrounding genes of the Mexican tetra *WA/WB* gene pair can be found (indicated by blue lines).

In the corresponding region of zebrafish chromosome 11 (shown on the right of the Mexican tetra's), *WA* and *WB* genes are not present, but present on zebrafish chromosome 13 (see E).

In the region of the human chromosome 1 previously regarded as the *Mhc* paralogous regions (87, 88) (second from the right), homologous genes or closely related genes for some surrounding genes of the Mexican tetra *WA/WB* gene pair can be found (shown in red color), and these are also indicated in the figure of the Mexican tetra and zebrafish chromosomal regions.

In the region of 80 M~100 M of human chromosome 7 which includes MHC nonclassical MHC class I gene (*AZGP1*) (shown on the far right), closely related genes for some surrounding genes of the Mexican tetra *WA/WB* gene pair can be found (shown in red or green color). *VPS50* and *COL1A2* genes are present near *AZGP1*. In the human *Mhc* region, *VPS52* (chromosome 6p21.32, 33 M 271 K) and *COL11A2* (chromosome 6p21.32, 33 M 193 K) are located close to each other like *VPS50* and *COL1A2* shown in the figure.

In the surrounding region of the Mexican tetra *WA/WB* gene pair, *sema3f* gene, whose related gene fragment can be found near the great white shark W-category genes (shown in A), is highlighted in light blue color. On human chromosome 7 (on the far right), closely related genes for this *sema3f* gene are also highlighted in light blue color.

**E**, Zebrafish chromosome 13 containing *WA* (red) and *WB* (blue) genes. Genomic regions of zebrafish relatives, e. g., Amur ide, fathead minnow and common carp, also containing a *WA/WB* gene pair.

The *WA/WB* pair of zebrafish and its relatives is located between *fibulin 7* gene (*fbln7*) and *zinc finger CCCH-type containing 6* gene (*zc3h6*).

On human chromosome 2 (shown on the left of the zebrafish's), homologous genes for many surrounding genes of the zebrafish *WA/WB* gene pair can be found (indicated by blue lines).

In the region of zebrafish chromosome 13 shown, homologous genes for several genes in green color are located on human chromosome 6: *TMEM63B* (6p21.1, 44 M 126 K), *SLC29A1* (6p21.1, 44 M 219 K), *MTRFIL* (6q25.2, 153 M 3 K), *FBXO5* (6q25.2, 152 M 983 K), and *VIP* (6q25.2, 152 M 750 K). Near human chromosome 6q25.2, several MHC related genes are present, including *ULBP1~3*, e. g., *ULBP3* (6q25.1, 150 M 69 K). Homologous genes for several genes in red color are located on human chromosome 1: *NTPCR* (1q42.2, 232 M 950 K), *SIPA1L2* (1q42.2, 232 M 630 K), *DISC1* (1q42.2, 231 M 626 K), *TSNAX* (1q42.2, 231 M 528 K), and *EGLNI* (1q42.2, 231 M 425 K). Near human chromosome 1q42.2, some *Mhc* region-related genes are present, including *AKT3* (1q43-q44, 243 M 851 K).

Amur ide 28 M contig and fathead minnow 111 K contig contain a *WA/WB* pair at the genomic region corresponding to the zebrafish chromosome 13.

In case of common carp, two pairs of *WA* and *WB* genes exist, namely, a pair of *WA\_A1* and *WB\_B1* and another pair of *WA\_A2* and *WB\_B2*. The common carp contig containing *WA\_A1* and *WB\_B1* comes in two forms with different genomic configuration, depending on the genomic source: in one form (common carp 107 K contig, *SI Appendix*), an inversion including a partial *WA\_A1* was observed. The common carp contigs containing *WA\_A2* and *WB\_B2* also comes in two forms with different genomic configuration, depending on the genomic source (the difference indicated by a bracket): in one form (common carp 138 K contig), there exists a *WB\_B2* gene fragment at around 100 kb distant from the full-length *WB\_B2* gene, as shown in the figure.

Mexican tetra chromosome 25, containing *fibulin-7* gene and corresponding to the zebrafish chromosome 13 region, is shown (on the far right).

**F**, Common carp W-category gene fragment maps close to the nonclassical class I and class II genes. *WA*  $\alpha$ 2 domain gene fragment (red) exists near MHC class I (light blue) and class II (orange for IIA and green for IIB) genes in the common carp genome. Left, a portion of a common carp 20 M contig on which *WA\_A1*  $\alpha$ 2 fragment is present. Close to this sequence, nonclassical lineage class I and nonclassical lineage class II genes are present. The genomic environment of this region partly resembles the zebrafish chromosome 8 (right) where several nonclassical class I (L-lineage), nonclassical class II genes and some other genes are located (89). Right, the region of 40M~45M of the zebrafish chromosome 8 with selected genes. “Ca ch” stands for “calcium release-activated calcium channel protein 1-like”.

Additional information is described in Supplementary Information. Information on the contigs in this figure is listed in Table S3. Only selected genes are shown, and the genomic maps are schematic and not proportional to the actual distances of DNA.

Fig. S12

A

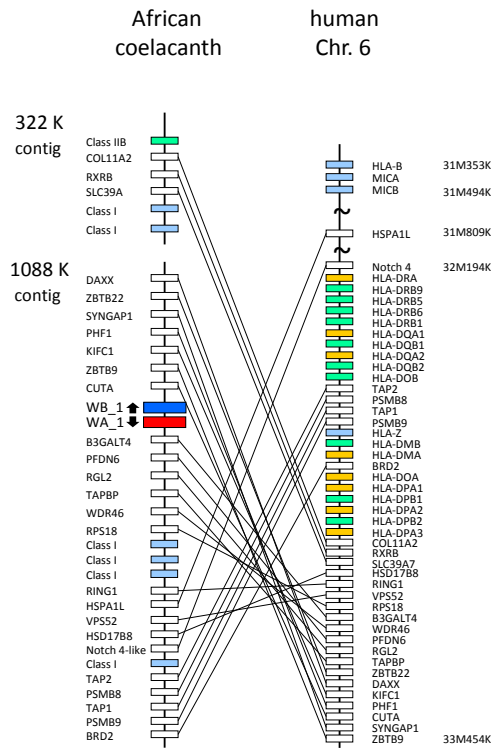

B

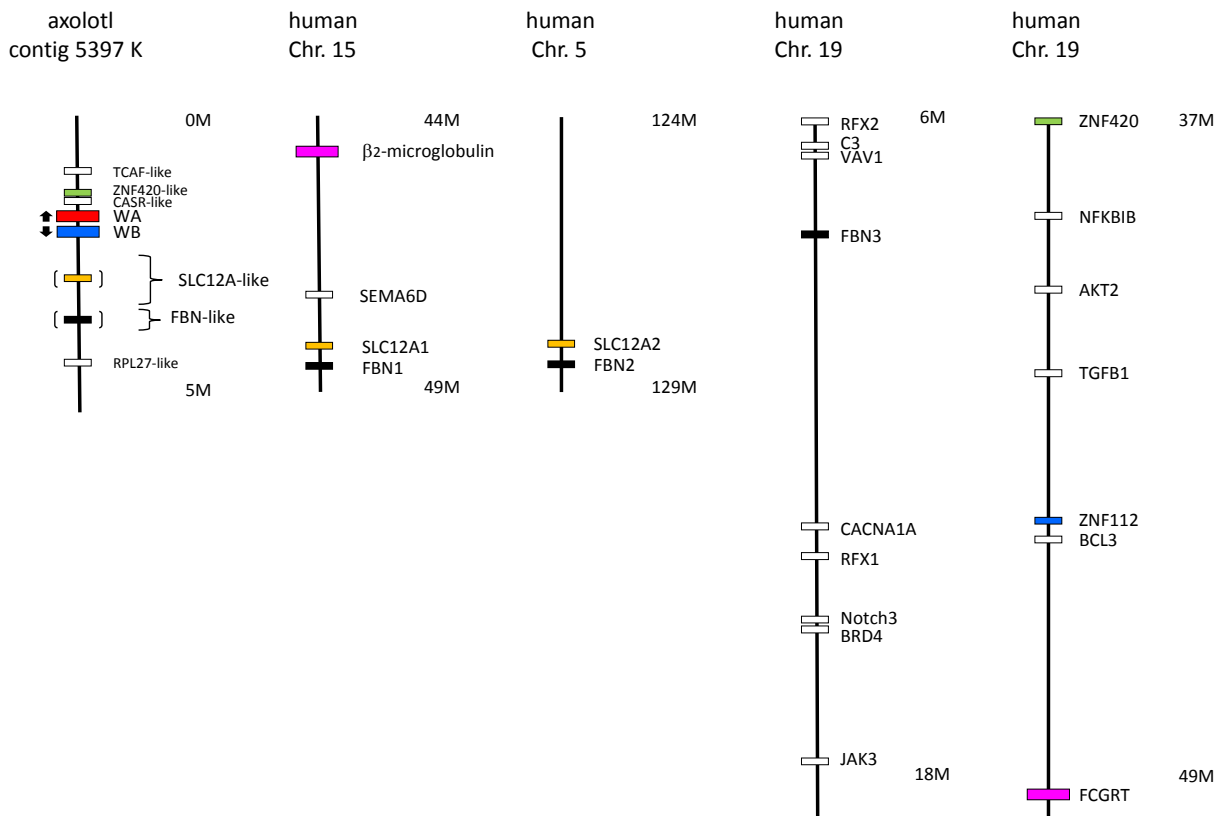

**Fig. S12. Genomic locations of W-category genes of coelacanth and of salamander axolotl.**

**A,** Coelacanth *WA/WB* gene pair maps within the *Mhc* region.

In the *Mhc* region of the African coelacanth, *WA\_1* (red) and *WB\_1* (blue) genes were identified (*SI Appendix*). The locations of various genes present in this region (34, 35) were compared with those of the corresponding human genes situated at the human *Mhc* region (chromosome 6p21.3) as shown on the right-hand side. Colors indications are as follows: MHC class I, light blue; MHC class II  $\alpha$  chain, orange; MHC class II  $\beta$  chain, green.

**B,** Salamander axolotl *WA/WB* gene pair exists together with genes related to the *Mhc* regions.

Axolotl *WA* (red) and *WB* (blue) gene sequences were identified in one contig. The genes are not intact which may be due to some difficulties in sequencing this region (*Supplementary Information*).

In addition to the W-category sequences, in the surrounding regions there are notable sequences related to the *Mhc* region as described below:

*ZNF420*-like sequences (length ~1628 bp) covering partial coding sequences (666-2294) of the fifth exon (399-3639) of human *ZNF420* transcript variant 2 (NM\_144689) with around 65 % identity. The human *ZNF420* gene exists on chromosome 19q13.12 (37 M 7 K, far right in the figure) in a region previously regarded as *Mhc* paralogous (28). In this region, the nonclassical MHC class I gene *FCGRT* (encoding FcRn protein) is located as shown. A gene homologous to the *ZNF112* gene (near the center of the region shown) was reported to exist next to the  $\beta_2$ -microglobulin gene in the nurse shark (28).

*CASR*-like sequence (length ~157 bp) corresponding to partial coding sequences (~2837-2994) of the seventh exon (2208-10150) of human *CASR* transcript variant 1 (NM\_001178065) with 71 % identity (113/159). The human *CASR* gene exists on chromosome 3q13.33-q21.1 (122 M 183 K) near some *Mhc* region-related genes, e. g., *CD86* (122 M 55 K), *CD80* (119 M 559 K), *SEMA5B* (123 M 28 K) and *WDR5B* (122 M 416 K) genes. *CD80* and *CD86* belong to B7 family, whose members are found in the *Mhc*-related regions. *WDR5B* is closely related with *WDR13* (chromosome Xp11.23, 48 M 590 K). *WDR13*-like sequences were found near W-category genes of great white shark (Fig. S11A). The human *WDR5* gene, the homolog of *WDR5B*, exists on chromosome 9q34.2 (134 M 135 K) which was previously regarded as the *Mhc* paralogous region (87, 88).

*SLC12A*-like sequences are present in the region of 2.5 ~3.5 M of this contig. Examples are as follows. One *SLC12A*-like sequence corresponds to a partial coding sequence (~804-940) of the first exon (1-945) of human *SLC12A2* (chromosome 5q23.3, 128 M 83 K) transcript variant 1 (NM\_001046) with 75 % identity (104/139). Another *SLC12A*-like sequence corresponds to a coding sequence (~1900-2023) including the fourteenth exon (1901-2002) of human *SLC12A1* (chromosome 15q21.1, 48 M 206 K) transcript variant 1 (NM\_000338) with 80 % identity (100/125). The human *SLC12A1* and *FBN1* genes exist near  $\beta_2$ -microglobulin ( $\beta_2$ -m) gene on chromosome 15.

*FBN*-like sequences are present in the region of 3.5 ~ 3.9 M of this contig. *FBN*-like sequences in this contig correspond to many coding exon sequences of the human *FBN2*, *FBN3* and *FBN1* sequences. Examples are as follows. One *FBN*-like sequence corresponds to a coding sequence (~1269-1468) including the sixth exon (1271-1468) of human *FBN2* mRNA (NM\_001999) with 85 % identity (170/200). Another *FBN*-like sequence corresponds to a coding sequence (~8087-8218) including the sixty-third exon (8095-8214) of human *FBN1* mRNA (NM\_000138) with 82 % identity (108/132). The homologs of *FBN* genes exist on human chromosome 15q21.1, 48 M 645 K (*FBN1*), 5q23.3, 128 M 538 K (*FBN2*) and 19p13.2, 8 M 149 K (*FBN3*) which are previously regarded as *Mhc* related regions (87, 88). Both the human *SLC12A* and *FBN* homologs are present on human chromosomes 5 and 15 as shown.



The axolotl contig also contains human *TCAF1/TCAF2*-like and *RPL27*-like sequences as shown. The locations of these human genes on human chromosomes are: *TCAF1* and *TCAF2*, 7q35 (~143 M); *RPL27*, 17q21.31 (~43 M).

Information on the contigs in this figure is listed in Table S3. Only selected genes are shown, and the genomic maps are schematic and not proportional to the actual distances of DNA. Some annotated pseudogenes are included. Within the African coelacanth 1088 K contig, additional class I gene (fragment) sequences are present, but not indicated.

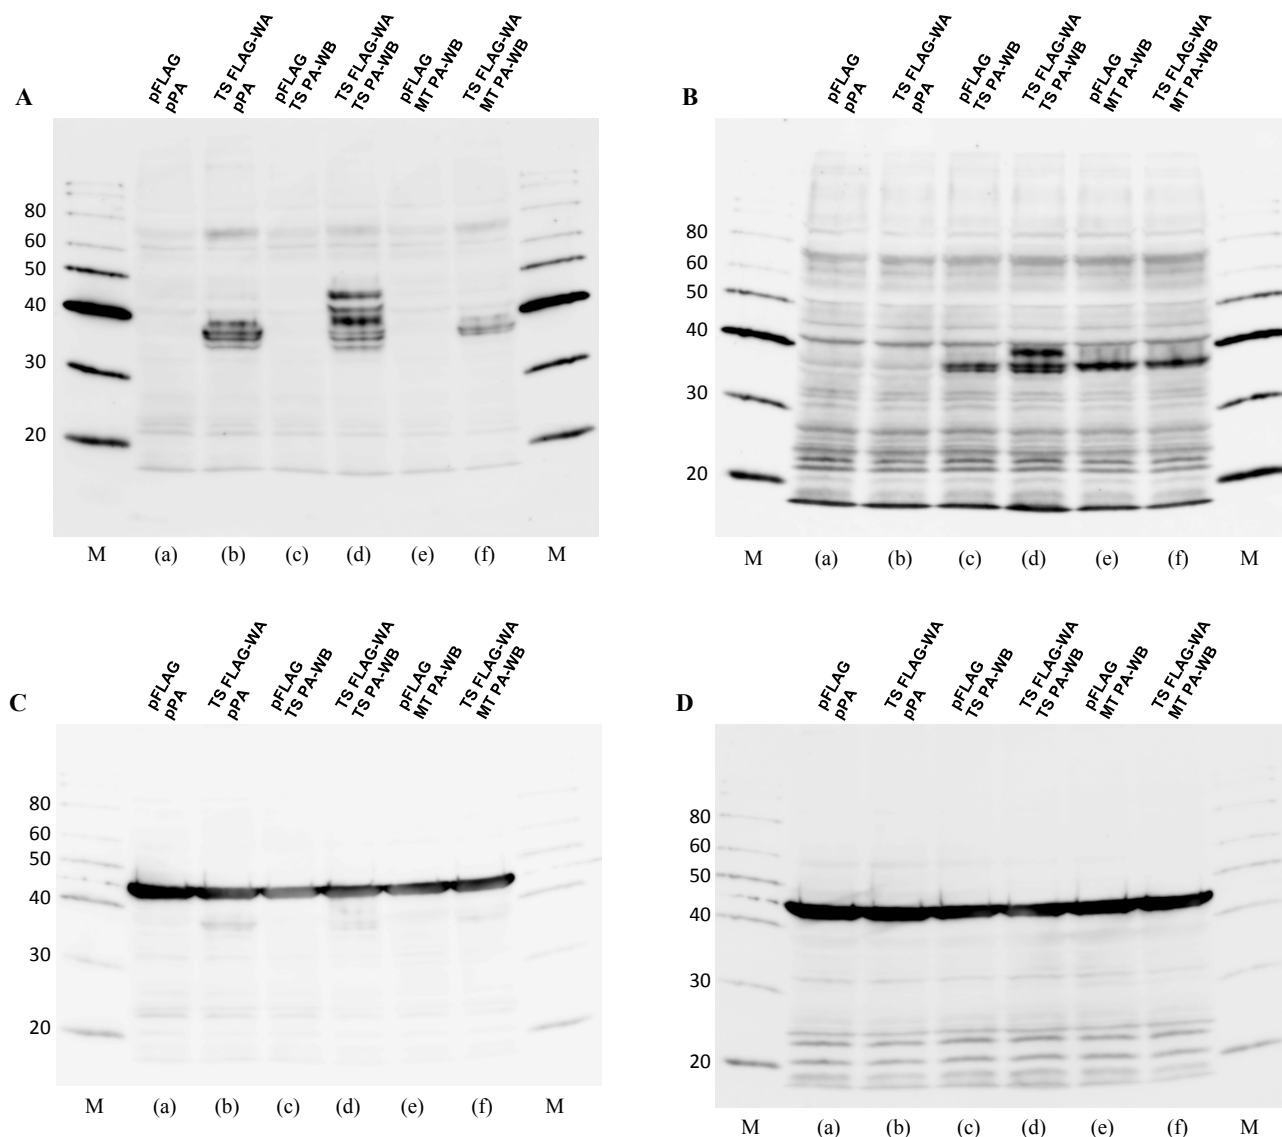

**Fig. S13. Production of recombinant WA and WB proteins in transfected cells with  $\beta$ -actin control.** Total proteins from CHO K-1 transfected cells were investigated by Western blot analyses. The panels (A) and (B) are the same as those in Fig. 6. (A) FLAG-tagged WA detected by anti-FLAG antibody. (B) PA-tagged WB detected by anti-PA antibody. (C)  $\beta$ -actin controls using the membrane in A. (D)  $\beta$ -actin controls using the membrane in B. Apparent molecular weights of protein size markers are indicated in kilo Dalton. Abbreviations are the same as those in Fig. 6. See *SI Appendix* for details.

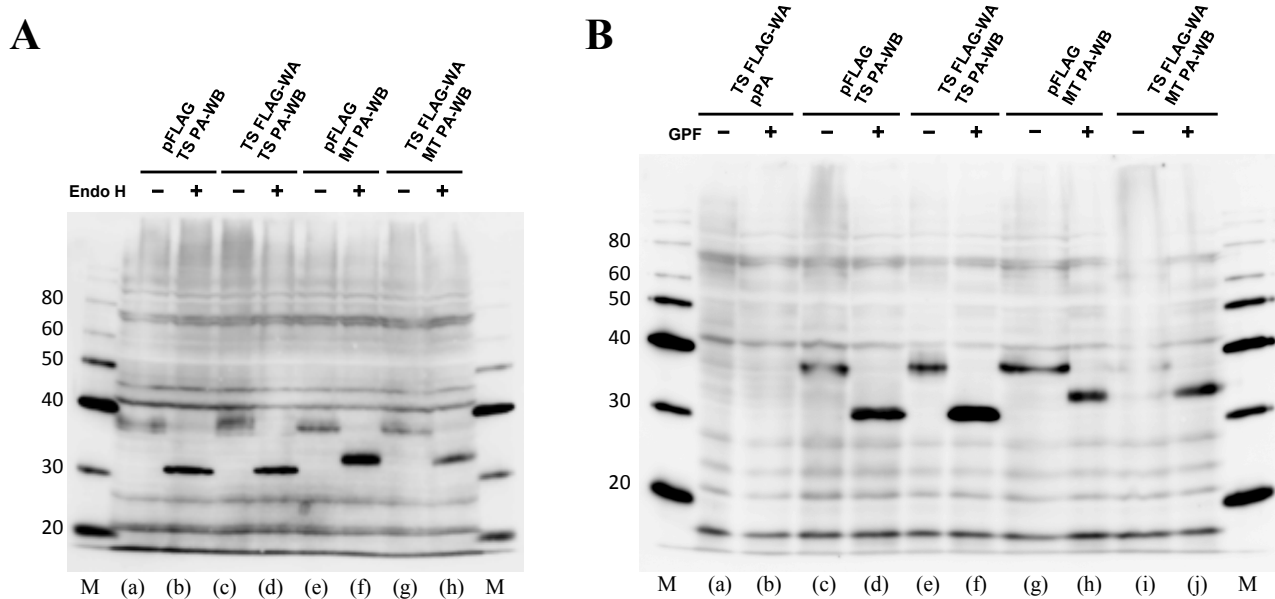

**Fig. S14. Digestion of recombinant WB protein by Endoglycosidase H (Endo H) or Glycopeptidase F (GPF).** Enzyme-digested total protein from transfected CHO-K1 cells were investigated by Western blot analyses. (A) PA-tagged WB with/without (+/-) Endo H digestion detected by anti-PA antibody. (B) PA-tagged WB with/without (+/-) GPF digestion detected by anti-PA antibody. Apparent molecular weights of protein size markers are indicated in kilo Dalton. Abbreviations are the same as those in Fig. 6. See *SI Appendix* for details.

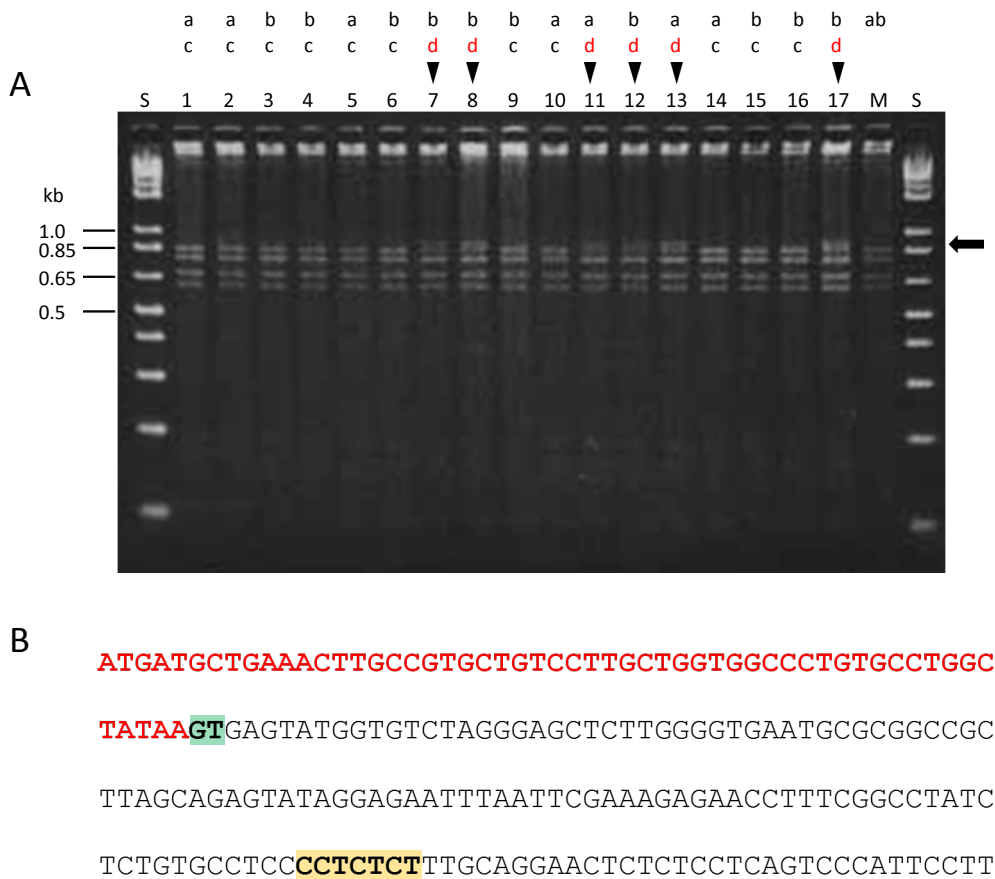

**Fig. S15. Linkage analysis of banded houndshark  $\beta_2-m$  gene.**

**A**, Banded houndshark  $\beta_2-m$  gene is linked with the classical MHC genes. The PCR products amplified with forward (F11) and reverse (R10) primers were digested with the restriction enzyme *Mbo*II and the products were analyzed using agarose gel electrophoresis. Arrowheads (on top) indicate the samples in which an additional band (indicated by an arrow on the right hand side) of slightly larger than 850 bp can be observed. The distribution of this additional band among the seventeen littermate sharks perfectly matches with that of the paternal haplotype “d” described in case of the classical MHC genes (Fig. S9; 17). Assumed classical MHC haplotype classifications are shown on top (“d” in red). The lengths of size markers (S) are indicated on the left. An agarose gel of 4 % was used. **B**, The genomic sequence near the leader-coding exon of the banded houndshark  $\beta_2-m$  gene reveals haplotype variation. Red letters show the leader-encoding nucleotides starting with a methionine start codon, ATG. Green shading indicates a splicing signal sequence. Yellow shading indicates the seven nucleotides which are present in the paternal haplotype “d” of the banded houndshark individual No.12. The maternal haplotype “b” does not possess these seven nucleotides based on the analysis of the banded houndshark individual No.12 (haplotype “bd”). The maternal haplotype “a” and paternal haplotype “c” also do not appear to possess these seven nucleotides based on the result described in A. Additional information is described in *SI Appendix*.

Fig. S16

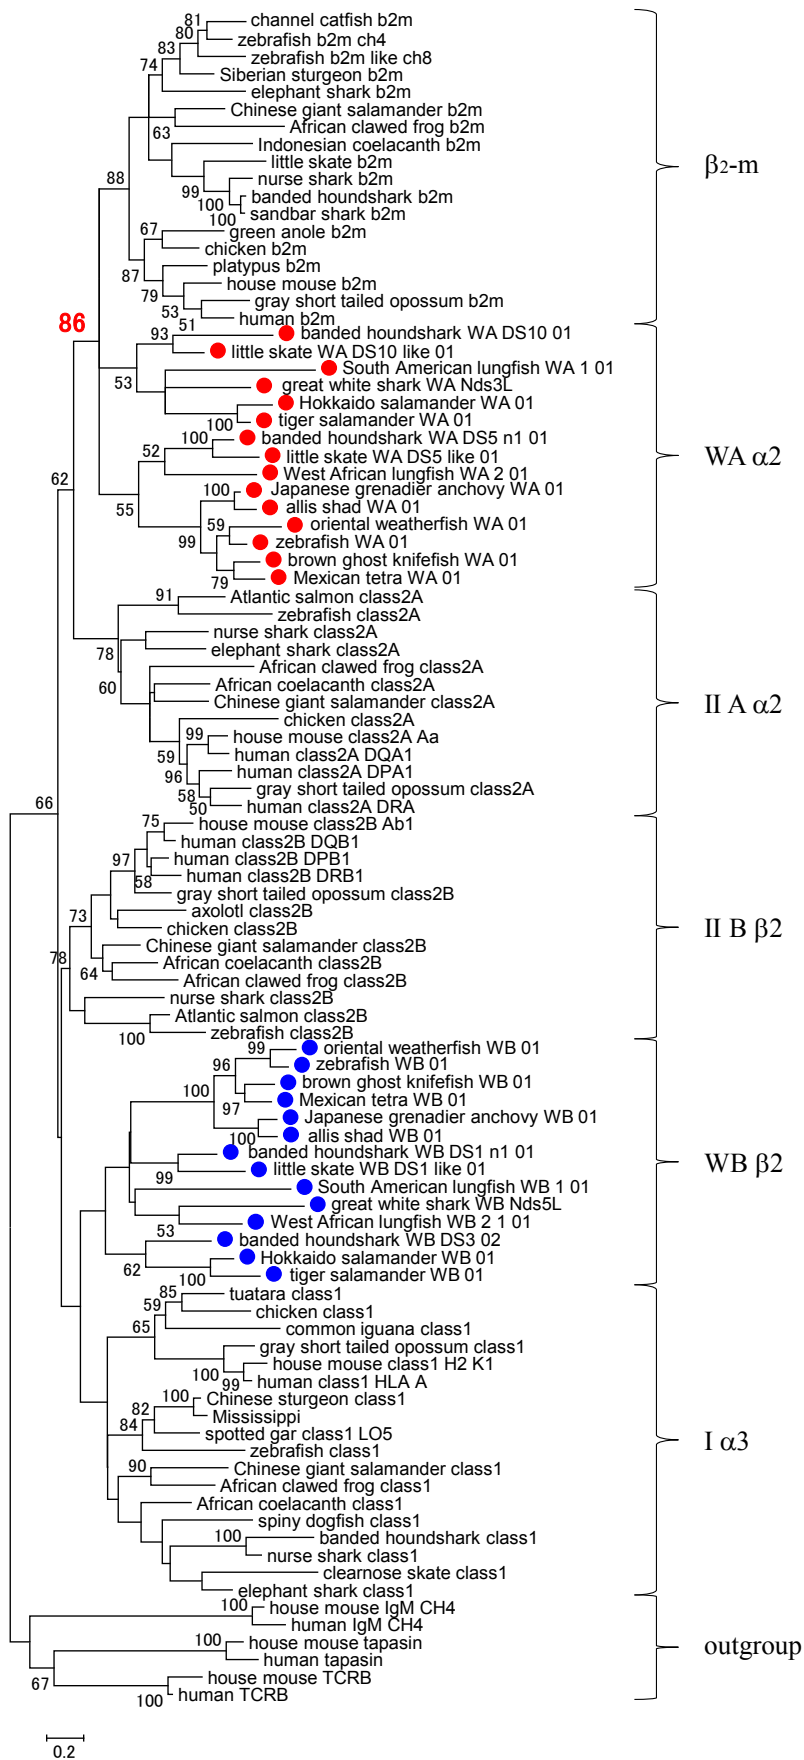

**Fig. S16. Phylogenetic tree analysis of W-category and MHC class I and class II molecules using DNA sequences.** The phylogenetic tree was constructed with the DNA sequences of the membrane-proximal Ig-like C1-set domains of selected MHC molecules using Maximum Likelihood. The percentage of trees (bootstrap value, 50 or greater) in which respective sequences clustered together is shown next to the nodes. The bootstrap value at the WA $\alpha$ 2/ $\beta$ 2-m node is shown in red. A more detailed explanation is described in the Materials and Methods. The alignment used for this analysis is based on the corresponding amino acid sequence alignment shown in Dataset S2. Red dots mark WA  $\alpha$ 2 sequences and blue dots mark WB  $\beta$ 2 sequences.

Fig. S17

A

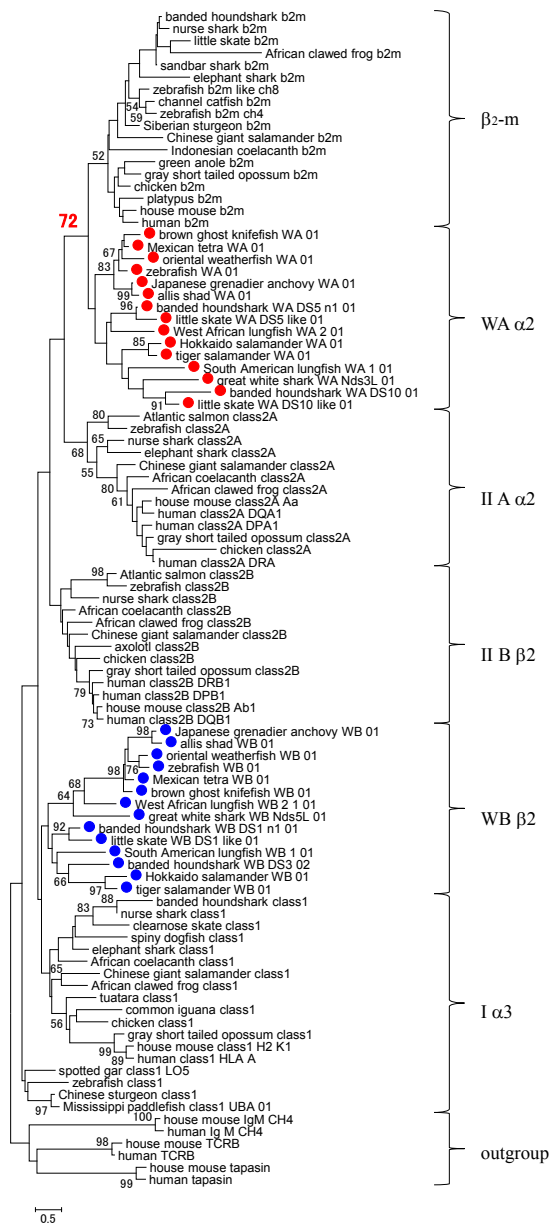

B

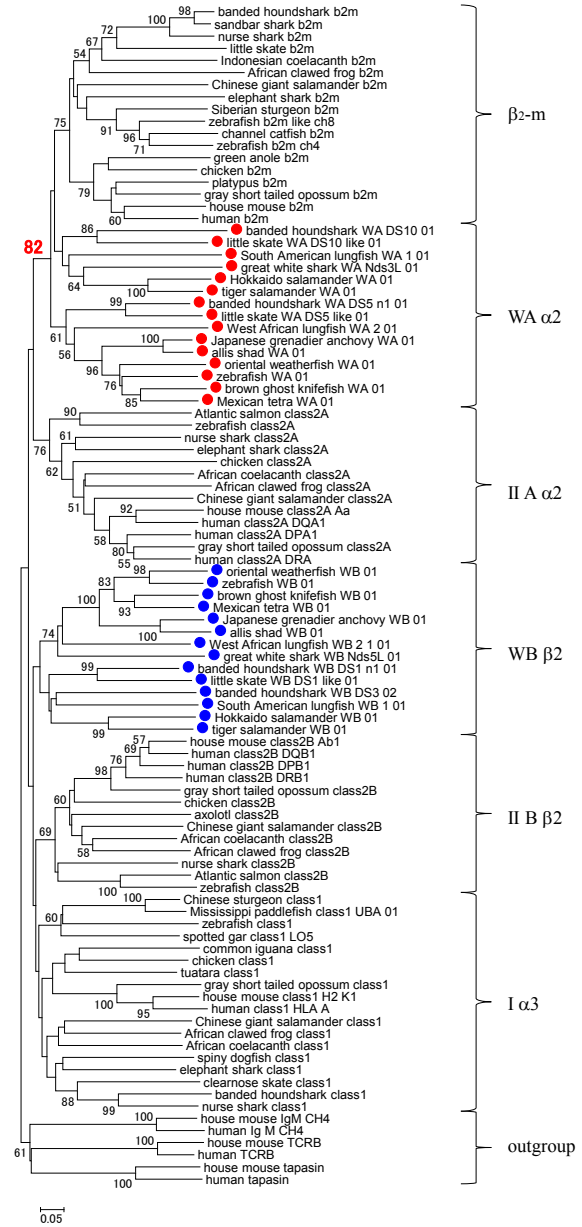

**Fig. S17. Phylogenetic tree analyses of W-category and MHC class I and class II molecules using the Neighbor Joining method.** The phylogenetic tree was constructed with membrane-proximal Ig-like C1-set domains of selected MHC molecules using the Neighbor Joining method with JTT model (**A**) or with p-distance model (**B**). The percentage of trees (bootstrap value, 50 or greater) in which respective sequences clustered together is shown next to the nodes. The bootstrap values at the WA $\alpha$ 2/ $\beta$ 2-m node are shown in red. A more detailed explanation is described in the Materials and Methods. The alignment used for this analysis is shown in Dataset S2. Red dots mark WA  $\alpha$ 2 sequences and blue dots mark WB  $\beta$ 2 sequences.



Fig. S18

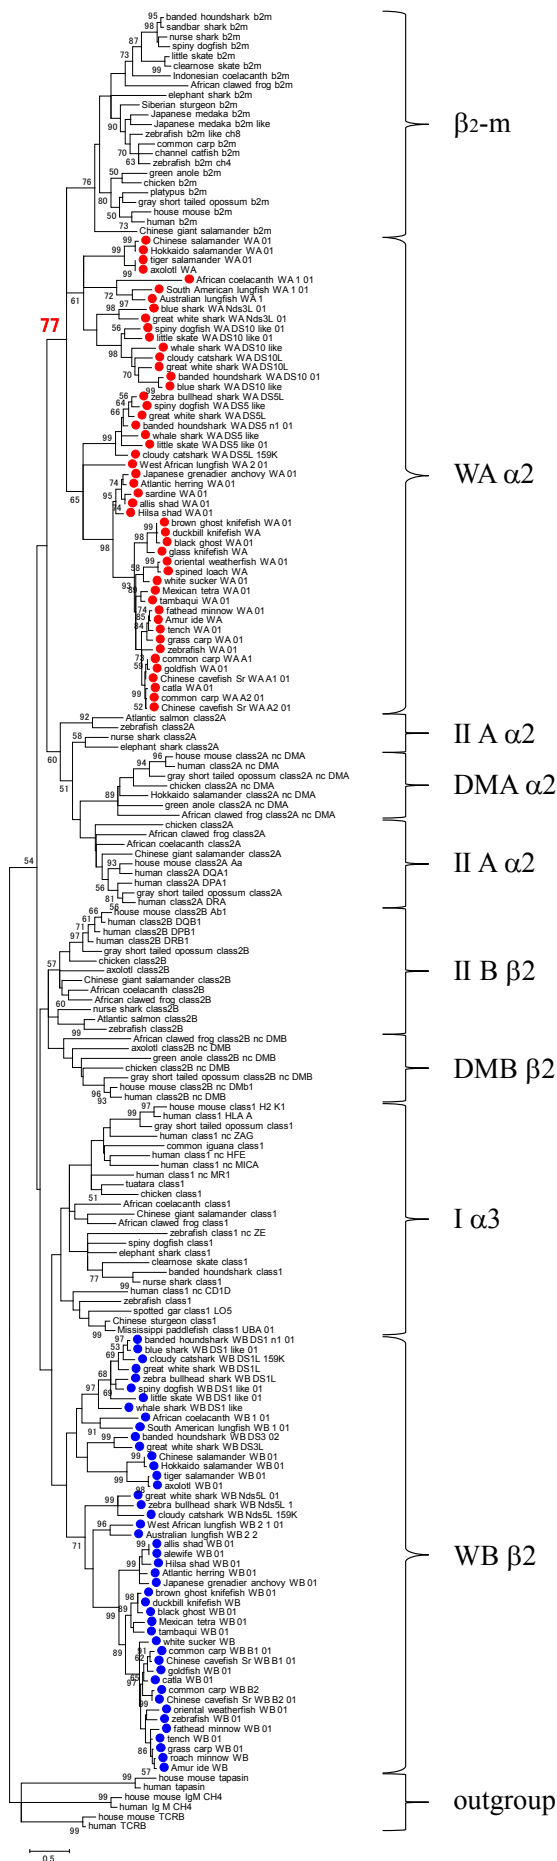

**Fig. S18. Phylogenetic tree analysis of W-category and MHC class I and class II molecules including nonclassical molecules.** The phylogenetic tree was constructed with membrane-proximal Ig-like C1-set domains of selected MHC molecules using Maximum Likelihood. Several nonclassical class I and class II molecules are included in this analysis. The percentage of trees (bootstrap value, 50 or greater) in which respective sequences clustered together is shown next to the nodes. The bootstrap value at the WA $\alpha$ 2/ $\beta$ 2-m node is shown in red. A more detailed explanation is described in the Materials and Methods. The alignment used for this analysis is shown in Dataset S2. Red dots mark WA  $\alpha$ 2 sequences and blue dots mark WB  $\beta$ 2 sequences.

## A Zebrafish WA

|                  |     |                                 |          |                           |     |
|------------------|-----|---------------------------------|----------|---------------------------|-----|
|                  |     | leader                          | ▼        | α1                        |     |
| zebrafish_WA_13A | 1   | MEVFTVRASLLTLLLYPHIIITWTDYHTVNI |          | LAYTRVMGNGSIDQTVVVLVND    | 90  |
| zebrafish_WA_01  | 1   | MEVFTVRASLLTLLLYPHIIITWTDYHTVNI |          | LAYTRVMGNGSIDQTVVVLVND    | 90  |
| zebrafish_WA_02  | 1   | MEVFTVRASLLTLLLYPHIIITWTDYHTVNI |          | LAYTRVMGNGSIDQTVVVLVND    | 80  |
| zebrafish_WA_03  | 1   | MEVFTVRASLLTLLLYPHIIITWTDYHTVNI |          | LAYTRVMGNGSIDQTVVVLVND    | 90  |
| zebrafish_WA_04  | 1   | MEVFTVRASLLTLLLYPHIIITWTDYHTVNI |          | LAYTRVMGNGSIDQTVVVLVND    | 76  |
| zebrafish_WA_05  | 1   | MEVFTVRASLLTLLLYPHIIITWTDYHTVNI |          | LAYTRVMGNGSIDQTVVVLVND    | 90  |
|                  |     | ▼                               | α2       |                           |     |
| zebrafish_WA_13A | 91  | VNKGFRHQTEYLELKKETKSSKTLFVRP    |          | SVLYAEFPEEEGKANVLYCYATGFY | 180 |
| zebrafish_WA_01  | 91  | VNKGFRHQTEYLELKKETKSSKTLFVRP    |          | SVLYAEFPEEEGKANVLYCYATGFY | 180 |
| zebrafish_WA_02  | 81  | VNKGFRHQTEYLELKKETKSSKTLFVRP    |          | SVLYAEFPEEEGKANVLYCYATGFY | 170 |
| zebrafish_WA_03  | 91  | VNKGFRHQTEYLELKKETKSSKTLFVRP    |          | SVLYAEFPEEEGKANVLYCYATGFY | 180 |
| zebrafish_WA_04  | 77  | VNKGFRHQTEYLELKKETKSSKTLFVRP    |          | SVLYAEFPEEEGKANVLYCYATGFY | 166 |
| zebrafish_WA_05  | 91  | VNKGFRHQTEYLELKKETKSSKTLFVRP    |          | SVLYAEFPEEEGKANVLYCYATGFY | 180 |
|                  |     | ▼                               | CP/TM/CY |                           |     |
| zebrafish_WA_13A | 181 | KYMKITPQTGDEYTCVHRHSSMSEPKIT    |          | VWRPEFSSSTSHPHYWAYTALGVM  | 250 |
| zebrafish_WA_01  | 181 | KYMKITPQTGDEYTCVHRHSSMSEPKIT    |          | VWRPEFSSSTSHPHYWAYTALGVM  | 250 |
| zebrafish_WA_02  | 171 | KYMKITPQTGDEYTCVHRHSSMSEPKIT    |          | VWRPEFSSSTSHPHYWAYTALGVM  | 240 |
| zebrafish_WA_03  | 181 | KYMKITPQTGDEYTCVHRHSSMSEPKIT    |          | VWRPEFSSSTSHPHYWAYTALGVM  | 250 |
| zebrafish_WA_04  | 167 | KYMKITPQTGDEYTCVHRHSSMSEPKIT    |          | VWRPEFSSSTSHPHYWAYTALGVM  | 220 |
| zebrafish_WA_05  | 181 | KYMKITPQTGDEYTCVHRHSSMSEPKIT    |          | VWRPEFSSSTSHPHYWAYTALGVM  | 250 |

## B Zebrafish WB

|                  |     |                               |          |                          |     |
|------------------|-----|-------------------------------|----------|--------------------------|-----|
|                  |     | leader                        | ▼        | β1                       |     |
| zebrafish_WB_13B | 1   | MLAFLLVSPHEVILGADEHAFQOQIECAF |          | NSQGGQVDRSWRYGYDGKDMHVDL | 90  |
| zebrafish_WB_01  | 1   | MLAFLLVSPHEVILGADEHAFQOQIECAF |          | NSQGGQVDRSWRYGYDGKDMHVDL | 90  |
| zebrafish_WB_02  | 1   | MLAFLLVSPHEVILGADEHAFQOQIECAF |          | NSQGGQVDRSWRYGYDGKDMHVDL | 90  |
| zebrafish_WB_03  | 1   | MLAFLLVSPHEVILGADEHAFQOQIECAF |          | NSQGGQVDRSWRYGYDGKDMHVDL | 72  |
| zebrafish_WB_04  | 1   | MLAFLLVSPHEVILGADEHAFQOQIECAF |          | NSQGGQVDRSWRYGYDGKDMHVDL | 72  |
| zebrafish_WB_05  | 1   | MLAFLLVSPHEVILGADEHAFQOQIECAF |          | NSQGGQVDRSWRYGYDGKDMHVDL | 90  |
|                  |     | ▼                             | β2       |                          |     |
| zebrafish_WB_13B | 91  | SAVKTVFLKSNNTLSRAAKPTVLLSNGG  |          | QGEYLKCVVRGFYPNVIRVRWTQK | 180 |
| zebrafish_WB_01  | 91  | SAVKTVFLKSNNTLSRAAKPTVLLSNGG  |          | QGEYLKCVVRGFYPNVIRVRWTQK | 180 |
| zebrafish_WB_02  | 91  | SAVKTVFLKSNNTLSRAAKPTVLLSNGG  |          | QGEYLKCVVRGFYPNVIRVRWTQK | 180 |
| zebrafish_WB_03  | 73  | SAVKTVFLKSNNTLSRAAKPTVLLSNGG  |          | QGEYLKCVVRGFYPNVIRVRWTQK | 162 |
| zebrafish_WB_04  | 73  | SAVKTVFLKSNNTLSRAAKPTVLLSNGG  |          | QGEYLKCVVRGFYPNVIRVRWTQK | 162 |
| zebrafish_WB_05  | 91  | SAVKTVFLKSNNTLSRAAKPTVLLSNGG  |          | QGEYLKCVVRGFYPNVIRVRWTQK | 180 |
|                  |     | ▼                             | CP/TM/CY |                          |     |
| zebrafish_WB_13B | 181 | VTCEIEHLSIDGKLRKNYGNPWFLSQIT  |          | VAVVAFILGELPCTAVVFWKRRH  | 264 |
| zebrafish_WB_01  | 181 | VTCEIEHLSIDGKLRKNYGNPWFLSQIT  |          | VAVVAFILGELPCTAVVFWKRRH  | 264 |
| zebrafish_WB_02  | 181 | VTCEIEHLSIDGKLRKNYGNPWFLSQIT  |          | VAVVAFILGELPCTAVVFWKRRH  | 264 |
| zebrafish_WB_03  | 163 | VTCEIEHLSIDGKLRKNYGNPWFLSQIT  |          | VAVVAFILGELPCTAVVFWKRRH  | 194 |
| zebrafish_WB_04  | 163 | VTCEIEHLSIDGKLRKNYGNPWFLSQIT  |          | VAVVAFILGELPCTAVVFWKRRH  | 250 |
| zebrafish_WB_05  | 181 | VTCEIEHLSIDGKLRKNYGNPWFLSQIT  |          | VAVVAFILGELPCTAVVFWKRRH  | 264 |

## C

| strain | individual | WA    |       | WB    |       |
|--------|------------|-------|-------|-------|-------|
| AB     | AB-1       | WA-01 |       | WB-01 |       |
|        | AB-2       | WA-01 |       | WB-01 |       |
| IND    | IND-1      | WA-01 |       | WB-01 |       |
|        | IND-2      | WA-01 | WA-02 | WB-01 |       |
| TL     | TL-1       | WA-03 | WA-04 | WB-02 | WB-03 |
|        | TL-2       | WA-04 |       | WB-04 |       |
| WIK    | WIK-1      | WA-05 |       | WB-05 |       |
|        | WIK-2      | WA-05 |       | WB-05 |       |

**Fig. S19. Variations in W-category molecules observed for zebrafish.**

**A**, Zebrafish WA sequences. **B**, Zebrafish WB sequences. Sequences labeled 01~05 were identified in individuals of four different zebrafish strains (AB, IND, TL and WIK) as summarized in C. WA\_13A and WB\_13B are taken from zebrafish genomic sequences. The primer sequences used to amplify zebrafish W-category cDNA are listed in Table S2. Red arrowheads indicate the corresponding positions of exon/intron borders in the genome. For some sequences, the amino and/or carboxyl terminal side(s) are not available because of the primer positions chosen. **C**, Distribution of zebrafish W-category sequences among various strains. One or two sequences for WA and for WB per individual could be identified using our procedure.

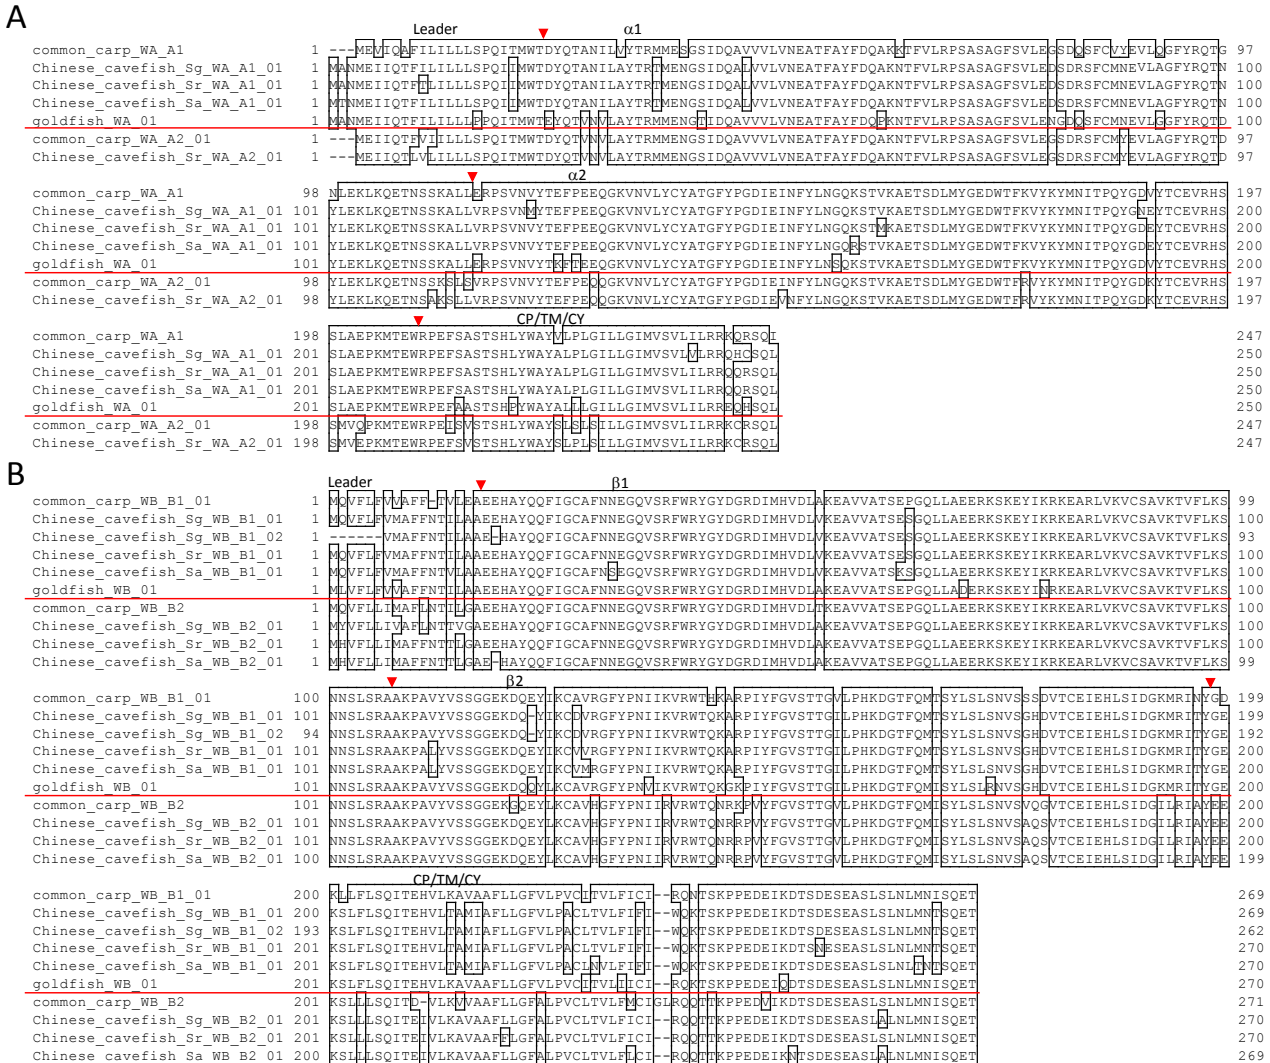

**Fig. S20. Variations in W-category molecules of Chinese cavefish in comparison with common carp and goldfish molecules.**

**A**, WA\_A1 and WA\_A2 sequences of different Chinese cavefish species, common carp and goldfish. A1 and A2 groups are separated with a red line. **B**, WB\_B1 and WB\_B2 sequences of Chinese cavefish, common carp and goldfish. B1 and B2 groups are separated with a red line. Goldfish WA\_01 and WB\_01 are also included in A and B, respectively. Goldfish WA\_01 and WB\_01 are similar to WA\_A1 and WB\_B1 of the other compared fishes, respectively. Chinese cavefish Sg = *Sinocyclocheilus graham*, Sr = *Sinocyclocheilus rhinoceros*, Sa = *Sinocyclocheilus anshuiensis*. Red arrowheads indicate the positions of exon/intron borders in the genome.

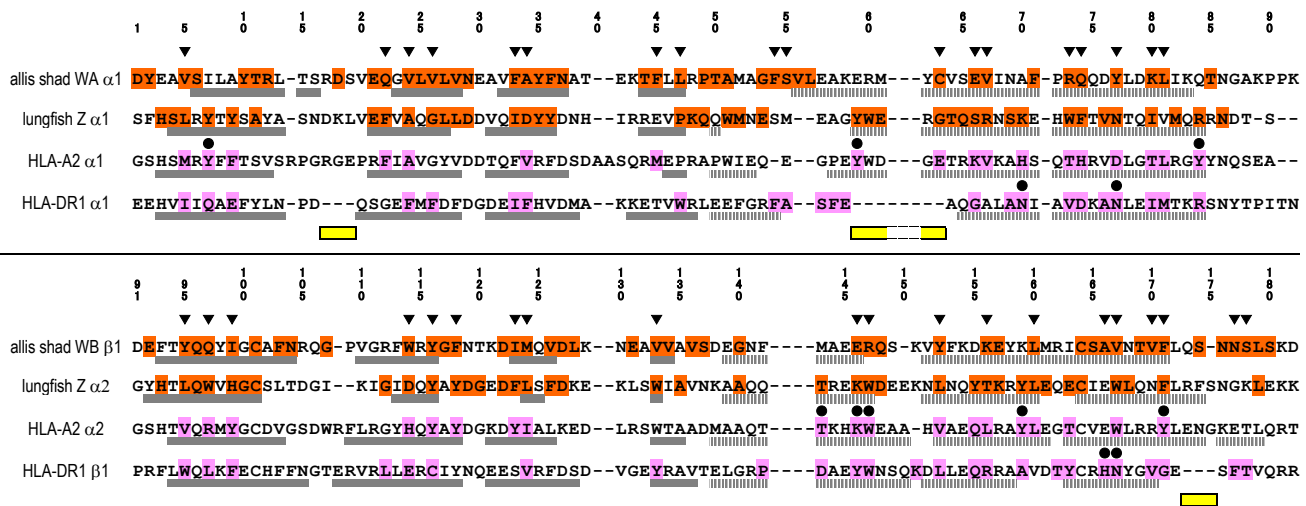

**Fig. S21. Highly conserved positions in the membrane-distal domains of the teleost fish W-category molecules: similarity with those of MHC-Z molecules and with peptide-binding positions of the classical MHC molecules.**

W-category amino acid residues of allis shad (*Alosa alosa*, Clupeidae, as a representative of the teleost fish) compared with lungfish MHC-Z molecule and with the classical MHC class I, HLA-A2 and the classical MHC class II, HLA-DR1. Orange-shaded residues of allis shad are invariable or highly conserved at the respective positions as verified among more than twenty teleost fish W-category sequences (Table S4). Orange-shaded residues of lungfish MHC-Z are invariable or highly conserved at the respective positions among MHC-Z molecules of lungfish and teleost fish (38). Magenta-shaded residues of HLA-A2 and of HLA-DR1 can interact with bound peptide antigens according to the references 29 and 31, respectively. Arrowheads indicate the amino acid positions where both the highly conserved teleost fish W-category amino acid positions and the peptide antigen binding positions of HLA-A2 and/or HLA-DR1 can be found. Large black dots above HLA-A2 sequence indicate amino acid residues highly conserved among the classical MHC class I molecules which interact with peptide termini of a bound peptide. Large black dots above HLA-DR1 sequence indicate amino acid residues highly conserved among the classical MHC class II molecules which interact with main chain residues of a bound peptide. Grey bars indicate positions of  $\beta$ -strands whereas dotted grey bars indicate positions of helical structures. For allis shad and lungfish molecules, these secondary structures were predicted as described in the Materials and Methods. Yellow boxes indicate gaps in class II molecules compared to class I molecules (Dataset S1). The residue numbers in this figure are based on those of HLA-A2 (29).

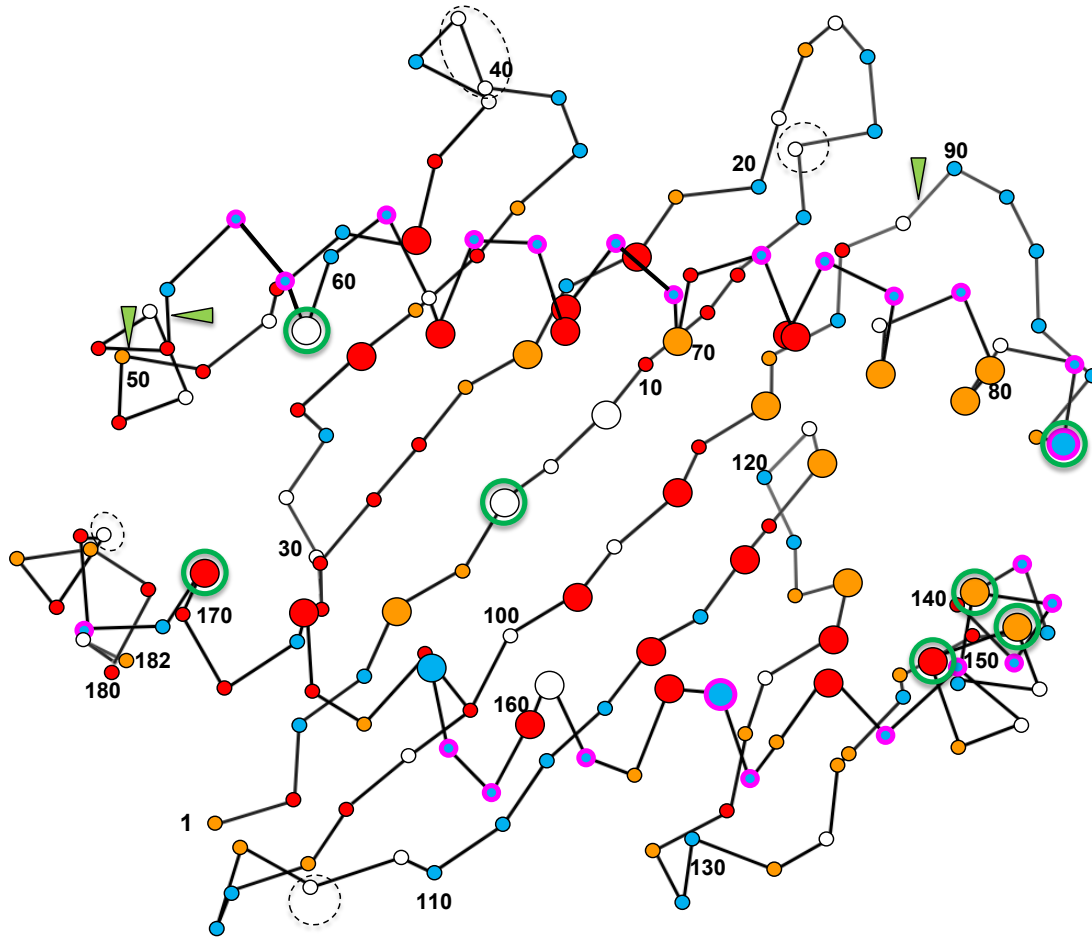

**Fig. S22. Conservation profile in the hypothetical membrane-distal domains of the teleost fish W-category molecule based on the structure of HLA-A2: the highly conserved positions in the teleost fish W-category molecule largely correspond to the peptide-binding positions of HLA-A2.**

Circles indicate positions of main chain C $\alpha$  of HLA-A2. Large circles (total 37) indicate peptide-binding positions of HLA-A2. For the respective amino acid positions of teleost fish W-category molecules, Wu-Kabat variability was calculated (Table S4), and the obtained values are classified with various colors as follows: red, 1.0 (invariable); orange, 2.1 - 2.5 (relatively highly conserved); white, 2.5 < and <= 4; blue, 4 < (highly variable). The number of peptide-binding positions labeled with different colors are as follows: red, 19; orange, 11; white, 4; and blue, 3. In the  $\alpha$ -helical regions, the positions with blue colors with especially high Wu-Kabat values (= or > 6) are labeled with magenta boundary lines, and many of them are positions on an  $\alpha$ -helix that are away from the site including those toward TCR. In HLA-A2 molecule, three peptide-binding residues at positions 146 (orange), 155 (blue) and 163 (blue) are classified as residues with intermediate positions on an  $\alpha$ -helix that point both into the peptide-binding site and away from the site (25). The eight positions with large green circles indicate the highly conserved amino acid positions of the classical MHC class I molecule, which interact with the N- or C-terminal of the bound peptide (the numbers of the positions are: Y7, Y59, (Y or R)84, T143, K146, W147, Y159, and Y171). In Fig. S21, these positions are shown with large black dots above the HLA-A2 sequence. The residues 1 to 90 correspond to WA  $\alpha$ 1 domain, and the residues 91 to 182 correspond to WB  $\beta$ 1 domain. Dotted lines indicate presumed absence of residue(s) in case of teleost fish W-category molecules compared to HLA-A2. Green triangles indicate presumed locations of

the presence of additional position(s) of teleost fish W-category molecule compared to HLA-A2. The structure is based on HLA-A2 of Protein Data Bank ID: 3HLA (29).

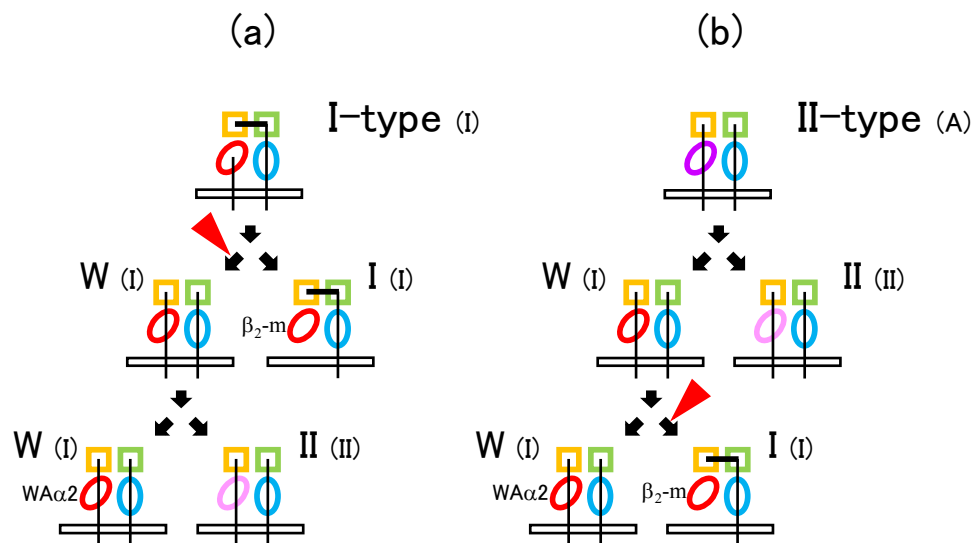

**Fig. S23. Models for MHC class divergence with W-category as an intermediate.**

(a) Class I-first model with W-category. The previous model (9) is modified with W-category as an intermediate. In this model, at the change from W (I) to II (II), inter-domain interfaces of W-category molecule should change into those of the conventional class II, including the loss of W61 of WA $\alpha$ 2 (corresponding to IIA $\alpha$ 2) and the acquisition of W61 of WB $\beta$ 2 (corresponding to IIB $\beta$ 2). Further, (F/L)37 of WA $\alpha$ 2 should change back to W37 of IIA $\alpha$ 2, which is highly conserved among many Ig superfamily members.

(b) Class II-first model with W-category. The previous model (7, 15) is modified with W-category as an intermediate. This is the same as Fig. 8C, but shown for comparison with (a).

Red arrowheads indicate the stages when alterations of domain architectures take place. The class I-type and the class II-type inter-domain interfaces are indicated by (I) and (II), respectively, and (A) indicates the ancestral state of the inter-domain interface.



**Table S1**

|                           | Order                   | Family                  | animal                                              | WA gene                     | WB gene                  | WA/WB linkage        |         |
|---------------------------|-------------------------|-------------------------|-----------------------------------------------------|-----------------------------|--------------------------|----------------------|---------|
| <b>Cartilaginous fish</b> |                         |                         |                                                     |                             |                          |                      |         |
| shark                     | Carcharhiniformes       | Carcharhinidae          | banded houndshark +                                 | WA_DS5, WA_DS10             | WB_DS1 WB_DS3            | all linked           |         |
|                           |                         |                         | blue shark                                          | WA_DS5L # WA_DS10L WA_Nds3L | WB_DS1L WB_DS3L WB_Nds5L |                      |         |
|                           |                         | Scyliorhinidae          | cloudy catshark                                     | WA_DS5L WA_DS10L            | WB_DS1L WB_Nds5L         | paired*              |         |
|                           | Lamniformes             | Lamnidae                | great white shark                                   | WA_DS5L WA_DS10L WA_Nds3L   | WB_DS1L WB_DS3L WB_Nds5L | paired*              |         |
|                           | Orectolobiformes        | Rhincodontidae          | whale shark                                         | WA_DS5L WA_DS10L            | WB_DS1L WB_DS3L          |                      |         |
|                           |                         | Hemiscylliidae          | whitespotted bambooshark<br>brownbanded bambooshark | WA_DS5L WA_DS10L WA_Nds3L   | WB_DS1L WB_DS3L WB_Nds5L |                      |         |
|                           | Heterodontiformes       | Heterodontidae          | zebra bullhead shark                                | WA_DS5L WA_DS10L            | WB_DS1L WB_Nds5L         |                      |         |
| skate                     | Squaliformes            | Squalidae               | spiny dogfish                                       | WA_DS5L WA_DS10L WA_Nds3L   | WB_DS1L WB_DS3L WB_Nds5L |                      |         |
|                           | Rajiformes              | Rajidae                 | little skate                                        | WA_DS5L WA_DS10L            | WB_DS1L WB_Nds5L         |                      |         |
| <b>Ray-finned fish</b>    |                         |                         |                                                     |                             |                          |                      |         |
| teleost fish              | Clupeiformes            | Engraulidae             | Japanese grenadier anchovy                          | WA                          | WB                       |                      |         |
|                           |                         | Clupeidae               | Atlantic herring                                    | WA                          | WB                       | paired               |         |
|                           |                         |                         | sardine                                             | WA                          | WB#                      |                      |         |
|                           |                         |                         | allis shad                                          | WA                          | WB                       |                      |         |
|                           |                         |                         | alewife                                             | WA                          | WB                       |                      |         |
|                           |                         |                         | Hilsa shad                                          | WA                          | WB                       | paired               |         |
|                           |                         | Cypriniformes           | Cobitidae                                           | oriental weatherfish        | WA                       | WB                   |         |
|                           |                         |                         |                                                     | spined loach                | WA                       |                      |         |
|                           |                         |                         | Catostomidae                                        | white sucker                | WA                       | WB                   |         |
|                           | Cyprinidae              |                         |                                                     | common carp                 | WA_A1 WA_A2              | WB_B1 WB_B2          | paired* |
|                           |                         |                         | Chinese cavefish                                    | WA_A1 WA_A2                 | WB_B1 WB_B2              | paired*              |         |
|                           |                         |                         | goldfish +                                          | WA                          | WB                       |                      |         |
|                           |                         |                         | catla                                               | WA                          | WB                       |                      |         |
|                           |                         |                         | tench                                               | WA                          | WB                       |                      |         |
|                           |                         |                         | grass carp                                          | WA                          | WB                       |                      |         |
|                           |                         |                         | fathead minnow                                      | WA                          | WB                       | paired               |         |
|                           |                         | roach minnow            | WA                                                  | WB                          |                          |                      |         |
|                           | Amur ide                | WA                      | WB                                                  | paired                      |                          |                      |         |
|                           | Gymnotiformes           | Apteronotidae           | brown ghost knifefish                               | WA                          | WB                       | paired               |         |
|                           |                         |                         | black ghost                                         | WA                          | WB                       |                      |         |
|                           |                         |                         | duckbill knifefish                                  | WA                          | WB                       |                      |         |
|                           |                         | Sternopygidae           | glass knifefish                                     | WA                          |                          |                      |         |
|                           | Characiformes           | Characidae              | Mexican tetra +                                     | WA                          | WB                       | paired               |         |
|                           |                         | Serrasalminidae         | tambaqui                                            | WA                          | WB                       |                      |         |
|                           | <b>Lobe-finned fish</b> |                         |                                                     |                             |                          |                      |         |
|                           | coelacanth              | Coelacanthiformes       | Latimeriidae                                        | African coelacanth          | WA_1                     | WB_1                 | paired  |
|                           |                         |                         |                                                     | Indonesian coelacanth       | WA_1#                    | WB_1#                |         |
|                           | lungfish                | Lepidosireniformes      | Protopteridae                                       | West African lungfish +     | WA_1# WA_2               | WB_1# WB_2_1 WB_2_2# |         |
|                           |                         |                         |                                                     | Slender lungfish            | WA_1# WA_2#              | WB_1# WB_2_1#        |         |
| Lepidosirenidae           |                         | South American lungfish | WA_1                                                | WB_1                        |                          |                      |         |
|                           | Ceratodontiformes       | Ceratodontidae          | Australian lungfish                                 | WA_1 WA_2#                  | WB_1# WB_2_1# WB_2_2     |                      |         |
| <b>Tetrapods</b>          |                         |                         |                                                     |                             |                          |                      |         |
| salamander                | Urodela<br>(Caudata)    | Hynobiidae              | Chinese salamander                                  | WA                          | WB                       |                      |         |
|                           |                         |                         | Hokkaido salamander                                 | WA                          | WB                       |                      |         |
|                           |                         | Ambystomatidae          | tiger salamander +                                  | WA                          | WB                       |                      |         |
|                           |                         |                         | axolotl                                             | WA                          | WB                       | paired               |         |

**Table S1. Summary of representative species from which W-category genes (*WA* and *WB*) were identified.** In cloudy catshark, two *WA\_DS5L* (*WA\_DS5L\_159K* and *WA\_DS5L\_82K*) and two *WB\_Nds5L* (*WB\_Nds5L\_159K* and *WB\_Nds5L\_82K*) were identified. Plus (+) symbols following the animals' name indicate that the W-category genomic and/or cDNA sequences from the relevant animals were experimentally determined in the present study. Hash (#) symbols indicate that the gene fragments were identified in SRA (Sequence Read Archive; see *SI Appendix*). Asterisks (\*) in the last column indicate that the *WA/WB* gene pairing situations are as follows: *WA\_DS5L/WB\_Nds5L* and *WA\_DS10L/WB\_DS1L* in cloudy catshark, *WA\_DS5L/WB\_Nds5L*, *WA\_DS10L/WB\_DS1L* and *WA\_Nds3L/WB\_DS3L* in great white shark, *WA\_A1/WB\_B1* and *WA\_A2/WB\_B2* in common carp and also in Chinese cavefish.

**Table S2 Primer sequences: forward (F) / reverse (R)**

| animal                | gene         | F/R                    | name                       | purpose            | location                | primer sequence (5' → 3')                 |                       |
|-----------------------|--------------|------------------------|----------------------------|--------------------|-------------------------|-------------------------------------------|-----------------------|
| banded houndshark     | WA_DS5       | F                      | DS5 5' UTR F1              | cDNA               | 5' UTR                  | CATTACCGGAGCCTGAGAGATTCCAGTGAA            |                       |
|                       |              | R                      | DS5 3' UTR R1              | cDNA               | 3' UTR                  | ATCAGCCAGAAACATCTGACAGGTCAAGAT            |                       |
|                       |              | F                      | DS5 5' UTR KpnI F1         | genomic            | 5' UTR                  | ATGGGTACCCATTACCGGAGCCTGAGAGATTCCAGTGAA   |                       |
|                       |              | R                      | DS5 3' UTR SacI R1         | genomic            | 3' part of exon 6, nc   | ATGGAGCTCATCAGCCAGAAACATCTGACAGGTCAAGAT   |                       |
|                       |              | F                      | DS5-6                      | Southern blot      | $\alpha 2$              | TGTTACGCAGAGAAATCTACCCCT                  |                       |
|                       |              | R                      | DS5-7                      | Southern blot      | $\alpha 2$              | CAGGCTGATATGATCCACTTGGCA                  |                       |
|                       | WA_DS10      | F                      | DS10-5                     | cDNA               | 5' UTR                  | GTCCGATCTCCACAGGAATG                      |                       |
|                       |              | R                      | DS10-7                     | cDNA               | 3' UTR                  | GGATATTGCCTGGTCTCGAG                      |                       |
|                       |              | F                      | DS10 5' UTR KpnI F1        | genomic            | 5' UTR                  | ATGGGTACCGTCCCATCTCCACAGGAATGAGATTTCTCTC  |                       |
|                       |              | R                      | DS10 3' UTR SacI R1        | genomic            | 3' UTR                  | ATGGAGCTCAACTTTGGAGAGCGTGCAAAAGAAAGTTCCAC |                       |
|                       |              | F                      | DS10-1                     | Southern blot      | $\alpha 2$              | TACGGTGAGGCAACATTCTGAGC                   |                       |
|                       |              | R                      | DS10-4                     | Southern blot      | $\alpha 2$              | GCAGGAATACATGTCCCAAGTTC                   |                       |
|                       |              | F                      | DS10-2                     | linkage, HhaI      | $\alpha 2$              | ACAATCACCATCACTTTCAGGTC                   |                       |
|                       |              | R                      | DS10-8                     | linkage, HhaI      | 3' UTR                  | AAGGCTGGACCAATCCATT                       |                       |
|                       |              | F                      | DS10-6                     | linkage, Amp       | 5' UTR                  | CAGGCTGGTCCAGAAAGG                        |                       |
|                       |              | R                      | DS10-14                    | linkage, Amp       | $\alpha 1$              | AAGAAGCCACGGTACTCCT                       |                       |
|                       |              | WB_DS1                 | F                          | DS1-13             | cDNA                    | 5' UTR                                    | AGGCAGTGAGGGGTCTGAACC |
|                       |              |                        | R                          | DS1-34             | cDNA                    | 3' UTR                                    | GGTGCTTCCAGTTTTGACGGT |
|                       | F            |                        | DS1-26                     | genomic, partial   | $\beta 2$               | CCGTCAACATAACCACACAT                      |                       |
|                       | R            |                        | DS1 3' UTR R1              | genomic, partial   | 3' UTR                  | GAGGGAGCAGGTGCCCTTCAGTTTTT                |                       |
|                       | F            |                        | DS1-48                     | Southern blot      | $\beta 2$               | TGTCATGTGAATGGATTCTATCCA                  |                       |
|                       | R            |                        | DS1-49                     | Southern blot      | $\beta 2$               | GCTACTGCTGTCTCCACTTGGCA                   |                       |
|                       | WB_DS3       | F                      | DS3-F1                     | cDNA               | 5' UTR                  | TGGCTTCCAACACAAAATACTGCACCGTT             |                       |
|                       |              | R                      | DS3-R1                     | cDNA               | 3' UTR                  | CTCATTCCGAGAGTCAGTGAAGACATGACA            |                       |
|                       |              | F                      | DS3-16                     | genomic, partial   | intron 4                | CAGAGCCACTCAGTGACGTTAT                    |                       |
|                       |              | R                      | DS3 intron 7 R             | genomic, partial   | intron 7                | ATACTTGCACTTCAGTGGTGAACACAGT              |                       |
|                       |              | F                      | DS3-31                     | Southern blot      | $\beta 2$               | TGCACAGTGTCCGGCTTCTACCCA                  |                       |
|                       |              | R                      | DS3-32                     | Southern blot      | $\beta 2$               | AAAGGTGACGTCCCAAGGCA                      |                       |
|                       | $\beta_2$ -m | F                      | $\beta_2$ -m-F11           | linkage            | 5' UTR                  | AGAAGTGCGGGAGGAGAGC                       |                       |
|                       |              | R                      | $\beta_2$ -m-R10           | linkage            | 3' UTR                  | AAAGAGAAAGGTTTTATCCACTG                   |                       |
|                       |              | F                      | $\beta_2$ -m-F12           | Southern blot      | 5' of Ig-like domain    | GTCTCCAAATGTCCAAAGTG                      |                       |
|                       |              | R                      | $\beta_2$ -m-R11           | Southern blot      | 3' of Ig-like domain    | CAAGCTGAATCTCTCTTGAA                      |                       |
| $\beta$ -actin        |              | F                      | Trsc $\beta$ -actin F1     | cDNA, short        | 90-109 (AB084472)       | ATGGATGATGAAATTCGAGC                      |                       |
|                       |              | R                      | Trsc $\beta$ -actin R1     | cDNA, short        | 281-300 (AB084472)      | TGGGGTACTTCAGGGTCAGG                      |                       |
|                       | F            | Trsc $\beta$ -actin F2 | cDNA, long                 | 126-148 (AB084472) | GGATCTGGTATGTGCAAGGCTGG |                                           |                       |
|                       | R            | Trsc $\beta$ -actin R2 | cDNA, long                 | 753-775 (AB084472) | GTGGCCATCTCCTGTCCAAAGTC |                                           |                       |
| goldfish              | WA           | F                      | GF 13A 5' UTR F3           | cDNA               | 5' UTR                  | GTTACTTTCTGTGAACCAAACTGCGTG               |                       |
|                       |              | R                      | GF 13A 3' UTR R2           | cDNA               | 3' UTR                  | CCTCATCTATAAGCCACAATGTACTGCG              |                       |
|                       | WB           | F                      | GF 13B 5' UTR F2           | cDNA               | 5' UTR                  | CTTTAAGTGTGTGAATGTTGACAAAACAAA            |                       |
|                       |              | R                      | GF 13B 3' UTR R1           | cDNA               | 3' UTR                  | ATGACAGGGTTGGAGTCACACTC                   |                       |
| zebrafish             | WA           | F                      | Zeb13A 5' UTR F1           | cDNA               | 5' UTR                  | CACAACGGAACTAATGTCTTTATACAGC              |                       |
|                       |              | F                      | Zeb13A Lead F1             | cDNA               | leader                  | GTCCGAGCATCTCTGTTAACTCTTC                 |                       |
|                       |              | R                      | Zeb13A TM R1               | cDNA               | TM                      | TTCAAAATCAGGGTAGATGTCCCGAT                |                       |
|                       |              | R                      | Zeb13A 3' UTR R1           | cDNA               | 3' UTR                  | AAAACAGGACCCAGATTGACCCCT                  |                       |
|                       | WB           | F                      | Zeb13B 5' UTR F1           | cDNA               | 5' UTR                  | GATCCGACGATAAAGCAAAGCATAACGC              |                       |
|                       |              | F                      | Zeb13B Lead F1             | cDNA               | leader                  | ATGAAGTCATCCTGGCCGACAGC                   |                       |
|                       |              | R                      | Zeb13B TM R1               | cDNA               | TM                      | GTGCACACAAATCCAAGAATAAAGCAAC              |                       |
|                       |              | R                      | Zeb13B 3' UTR R1           | cDNA               | 3' UTR                  | ATAAAGTCTGTTGTGCCATAATCAG                 |                       |
| Mexican tetra         | WA           | F                      | Mexican tetra WA lead F1   | cDNA               | leader                  | GCCTTCCAGGTACCTGCTGT                      |                       |
|                       |              | R                      | Mexican tetra WA TM R1     | cDNA               | TM                      | CACAACAAAGACCAGGTATCAGTC                  |                       |
|                       | WB           | F                      | Mexican tetra WB 5' UTR F1 | cDNA               | 5' UTR                  | TTCCCCAGAGACGCTGAGTAAG                    |                       |
|                       |              | R                      | Mexican tetra WB stop R1   | cDNA               | incl. stop codon        | TGATATCTCTGATGGAAGTGCATCA                 |                       |
| West African lungfish | WA           | F                      | Lungfish WA 5' UTR F1      | cDNA               | 5' UTR                  | TGCTGCCAAGTCATATGTTCCACATACTT             |                       |
|                       |              | F                      | Lungfish WA 5' UTR F2      | cDNA               | 5' UTR                  | GCACAAGTCATATGTTCCACATACTTCTCTTC          |                       |
|                       |              | R                      | Lungfish WA 3' UTR R1      | cDNA               | 3' UTR                  | CTGCGGATGAATTCCTCTATGAAGATACTCTAG         |                       |
|                       |              | R                      | Lungfish WA 3' UTR R2      | cDNA               | 3' UTR                  | GAGATATTCTGCTGCCTACATCTGCG                |                       |
|                       | WB           | F                      | Lungfish WB 5' UTR F1      | cDNA               | 5' UTR                  | CAGCTTACTTGAGCATGCACGTTAC                 |                       |
|                       |              | F                      | Lungfish WB start F1       | cDNA               | incl. start codon       | CACAGCAGCATGCTTTGCTCATG                   |                       |
|                       |              | R                      | Lungfish WB 3' UTR R1      | cDNA               | 3' UTR                  | AGGAGTTCCTCAAATTCAGAACACTGTAT             |                       |
|                       |              | tiger salamander       | WA                         | F                  | Sal-WA-F6               | cDNA                                      | 5' UTR                |
| R                     | Sal-WA-R6    |                        |                            | cDNA               | 3' UTR                  | TGTACAACTGATAATGTGCAATTCTAGGAC            |                       |
| WB                    | F            |                        | Sal-WB-F25                 | cDNA               | 5' UTR                  | TACTGAGCGCTGTGGTCTGCTACTC                 |                       |
|                       | R            |                        | Sal-WB-R25                 | cDNA               | 3' UTR                  | ACATAGGAGTCATTGGAGATGAACA                 |                       |

**Table S3** Accession numbers of the sequences in this study

Asterisks (\*) following accession numbers indicate the sequences which are clarified and registered in this study.

| Classification              | Animal species                    | Scientific name                | Gene name            | Accession No.                           | Information                                  |
|-----------------------------|-----------------------------------|--------------------------------|----------------------|-----------------------------------------|----------------------------------------------|
| WA                          | banded houndshark                 | <i>Triakis scyllium</i>        | WA DS5_n1_01         | AB910515 *                              | individual N1                                |
|                             |                                   |                                | WA DS5_n2_01         | AB910516 *                              | individual N1                                |
|                             |                                   |                                | WA DS5_n3_01         | AB910517 *                              | individual N1                                |
|                             |                                   |                                | WA DS5_n4_01         | AB910518 *                              | individual N1                                |
|                             |                                   |                                | WA DS5               | LC200977 *                              | individual N0, genomic, $\alpha 2$           |
|                             |                                   |                                | WA DS5_n3            | LC009545 *                              | individual N1, genomic                       |
|                             |                                   |                                | WA DS10_01           | LC196163 *                              | individual N1                                |
|                             |                                   |                                | WA DS10_02           | LC196164 *                              | individual N1                                |
|                             |                                   |                                | WA DS10              | LC009546 *                              | individual N1, genomic                       |
|                             |                                   |                                | WA DS10/WB_DS1_n2    | LC218721 *                              | individual N1                                |
|                             | blue shark                        | <i>Prionace glauca</i>         | WA DS10-like         | GFYY01081745                            |                                              |
|                             |                                   |                                | WA DS10-like         | GFYY01081744                            |                                              |
|                             |                                   |                                | WA Nds3L             | GFYY01021401                            |                                              |
|                             | cloudy catshark                   | <i>Scyliorhinus torazame</i>   | WA DS5-like          | BFAA01007584                            | 159 K contig                                 |
|                             |                                   |                                | WA DS5-like          | BFAA01011934                            | 82 K contig                                  |
|                             |                                   |                                | WA DS10-like         | BFAA01007584                            | 159 K contig                                 |
|                             | great white shark                 | <i>Carcharodon carcharias</i>  | WA DS5-like          | QUOW01001706                            | 285 K contig                                 |
|                             |                                   |                                | WA DS10-like         | QUOW01001706                            | 285 K contig                                 |
|                             |                                   |                                | WA Nds3L             | QUOW01001706                            | 285 K contig                                 |
|                             | whale shark                       | <i>Rhincodon typus</i>         | WA DS5-like          | LVEK01588988                            | $\alpha 1$                                   |
|                             |                                   |                                | WA DS5-like          | LVEK01625365                            | $\alpha 2$                                   |
|                             |                                   |                                | WA DS10-like         | LVEK01757095                            | $\alpha 1$                                   |
|                             |                                   |                                | WA DS10-like         | LVEK01573532                            | $\alpha 2$                                   |
|                             | whitespotted bambooshark          | <i>Chiloscyllium plagiosum</i> | WA DS5-like          | QFFF01095956                            | $\alpha 1, \alpha 2$                         |
|                             |                                   |                                | WA DS5-like          | QFFF01329347                            | $\alpha 2$                                   |
|                             |                                   |                                | WA DS5-like          | BEZZ01383420                            | $\alpha 1$                                   |
|                             |                                   |                                | WA DS10-like         | QFFF01486458                            | $\alpha 1, \alpha 2$                         |
|                             |                                   |                                | WA Nds3L             | QFFF01560724                            | $\alpha 2$                                   |
|                             | brownbanded bambooshark           | <i>Chiloscyllium punctatum</i> | WA DS5-like          | BEZZ01010960                            | $\alpha 1$                                   |
|                             |                                   |                                | WA DS5-like          | BEZZ01017577                            | $\alpha 1$                                   |
|                             |                                   |                                | WA DS5-like          | BEZZ01115237                            | $\alpha 1$                                   |
|                             |                                   |                                | WA DS10-like         | BEZZ01254771                            | $\alpha 1$                                   |
|                             |                                   |                                | WA DS10-like         | BEZZ01004761                            | $\alpha 2$ , contains WB_DS3-like            |
|                             | zebra bullhead shark              | <i>Heterodontus zebra</i>      | WA Nds3L             | BEZZ01099794                            | $\alpha 2$                                   |
|                             |                                   |                                | WA DS5-like          | GGGL01449115                            | contains WA_DS10-like                        |
|                             |                                   |                                | WA DS5-like          | GGGL01449117                            |                                              |
|                             |                                   |                                | WA DS5-like          | GGGL01449119                            | contains WA_DS10-like                        |
|                             |                                   |                                | WA DS5-like          | GGGL01449123                            |                                              |
|                             |                                   |                                | WA DS5-like          | GGGL01449125                            |                                              |
|                             |                                   |                                | WA DS5-like          | GGGL01449130                            | contains WA_DS10-like                        |
|                             |                                   |                                | WA DS5-like          | GGGL01449131                            | contains WA_DS10-like                        |
|                             |                                   |                                | WA DS5-like          | GGGL01449132                            | contains WA_DS10-like                        |
|                             |                                   |                                | WA DS5-like          | GGGL01449136                            | contains WA_DS10-like                        |
|                             |                                   |                                | WA DS5-like          | GGGL01449137                            |                                              |
|                             |                                   |                                | WA DS5-like          | GGGL01449140                            |                                              |
|                             |                                   |                                | WA DS5-like          | GGGL01449145                            | contains WA_DS10-like                        |
|                             |                                   |                                | WA DS5-like          | GGGL01449146                            |                                              |
|                             |                                   |                                | WA DS10-like         | GGGL01449113                            |                                              |
|                             |                                   |                                | WA DS10-like         | GGGL01449114                            |                                              |
|                             |                                   |                                | WA DS10-like         | GGGL01449115                            | contains WA_DS5-like                         |
|                             | WA DS10-like                      | GGGL01449119                   | contains WA_DS5-like |                                         |                                              |
|                             | WA DS10-like                      | GGGL01449130                   | contains WA_DS5-like |                                         |                                              |
|                             | WA DS10-like                      | GGGL01449131                   | contains WA_DS5-like |                                         |                                              |
|                             | WA DS10-like                      | GGGL01449132                   | contains WA_DS5-like |                                         |                                              |
|                             | WA DS10-like                      | GGGL01449133                   |                      |                                         |                                              |
|                             | WA DS10-like                      | GGGL01449135                   |                      |                                         |                                              |
|                             | WA DS10-like                      | GGGL01449136                   | contains WA_DS5-like |                                         |                                              |
|                             | WA DS10-like                      | GGGL01449145                   | contains WA_DS5-like |                                         |                                              |
|                             | spiny dogfish                     | <i>Squalus acanthias</i>       | WA DS5-like          | HAGW01089906                            | Fig. S1                                      |
|                             |                                   |                                | WA DS5-like          | HAGW01089902                            |                                              |
|                             |                                   |                                | WA DS5-like          | HAGW01089904                            |                                              |
|                             |                                   |                                | WA DS5-like          | HAGW01089907                            |                                              |
|                             |                                   |                                | WA DS5-like          | HAGW01089908                            |                                              |
|                             |                                   |                                | WA DS5-like          | HAGW01089910                            |                                              |
|                             |                                   |                                | WA DS5-like          | HAGT01020445                            |                                              |
|                             |                                   |                                | WA DS5-like          | HAGT01100691                            |                                              |
|                             |                                   |                                | WA DS5-like          | HAGV01095271                            |                                              |
|                             |                                   |                                | WA DS10-like         | HAGT01122485                            | partial $\alpha 1, \alpha 2$ , partial TM/CY |
|                             | little skate                      | <i>Leucoraja erinacea</i>      | WA Nds3L             | HAGT01004242                            | $\alpha 2$ , short                           |
|                             |                                   |                                | WA DS5-like          | AESE012173146                           | $\alpha 1$                                   |
|                             |                                   |                                | WA DS5-like          | AESE011681578                           | $\alpha 2$                                   |
|                             |                                   |                                | WA DS10-like         | AESE011594527                           | $\alpha 1$                                   |
|                             |                                   |                                | WA DS10-like         | AESE011170435                           | $\alpha 2$                                   |
|                             | WA DS10-like                      | AESE012658604                  | CP/TM/CY             |                                         |                                              |
|                             | Japanese grenadier anchovy        | <i>Coilia nasus</i>            | WA 01                | GFON01059655                            | $\alpha 1$ , partial $\alpha 2$              |
|                             | Atlantic herring                  | <i>Clupea harengus</i>         | WA 01                | JZKK01005006                            | 34 K contig                                  |
|                             |                                   |                                | WA 01                | OOLJ01000439                            | 344 K contig                                 |
|                             | sardine                           | <i>Sardina pilchardus</i>      | WA 01                | GGSC01089055                            |                                              |
|                             |                                   |                                | WA                   | GGSC01089054                            |                                              |
|                             |                                   |                                | WA                   | GGSC01089060                            |                                              |
|                             |                                   |                                | WA                   | GGSC01089061                            |                                              |
|                             |                                   |                                | WA                   | GGSC01089058                            | $\alpha 2$                                   |
|                             | WA                                | GGSC01089059                   | $\alpha 2$           |                                         |                                              |
|                             | allis shad                        | <i>Alosa alosa</i>             | WA 01                | GETY01010370                            |                                              |
|                             | alewife                           | <i>Alosa pseudoharengus</i>    | WA                   | GFCK01040569                            | partial $\alpha 2$ , CP/TM/CY                |
|                             | Hilsa shad                        | <i>Tenulosa ilisha</i>         | WA 01                | QYSC01123695                            | 325 K contig                                 |
| oriental weatherfish (Dojo) | <i>Misgurnus anguillicaudatus</i> | WA 01                          | GAA01002023          | partial                                 |                                              |
| spined loach                | <i>Cobitis taenia</i>             | WA                             | GGJF01002240         | partial $\alpha 1, \alpha 2$ , CP/TM/CY |                                              |
| white sucker                | <i>Catostomus commersonii</i>     | WA 01                          | GEEX01063527         |                                         |                                              |
| common carp                 | <i>Cyprinus carpio</i>            | WA A1                          | LN590696             | 26 M contig Songpu strain               |                                              |
|                             |                                   | WA A1                          | LN598268             | 890 K contig Songpu strain              |                                              |
|                             |                                   | WA A1 $\alpha 2$ fragment      | LN590685             | 20 M contig Songpu strain               |                                              |
|                             |                                   | WA A1                          | LHQP01015169         | 107 K contig European strain            |                                              |
|                             |                                   | WA A2                          | LN594648             | 138 K contig Songpu strain              |                                              |
|                             |                                   | WA A2 01                       | LHQP01028415         | 82 K contig European strain             |                                              |
|                             |                                   | WA A1 01                       | XM 016288790         |                                         |                                              |
| Chinese cavefish Sg         | <i>Sinocyclocheilus grahami</i>   | WA A1                          | LCYQ01031371         | 102 K contig                            |                                              |
|                             |                                   | WA A1                          | NW 015505413         | 2.6 M contig                            |                                              |
|                             |                                   | WA A2                          | LCYQ01012883         | 29 K                                    |                                              |
|                             |                                   | WA A2                          | LCYQ01125997         | 2 K                                     |                                              |

|                          |                                     |                    |               |                                                 |
|--------------------------|-------------------------------------|--------------------|---------------|-------------------------------------------------|
| Chinese cavefish Sr      | <i>Sinycyclocheilus rhinoceros</i>  | WA A1 01           | XM 016571073  |                                                 |
|                          |                                     | WA A1              | LAVF01079966  | 64 K                                            |
|                          |                                     | WA A1              | LAVF01079967  | 37 K                                            |
|                          |                                     | WA A1              | NW 015641068  | 124 K contig                                    |
|                          |                                     | WA A2 01           | XM 016544921  |                                                 |
|                          |                                     | WA A2              | LAVF01191476  | 50 K                                            |
|                          |                                     | WA A2              | NW 015666971  | 1.2 M contig                                    |
| Chinese cavefish Sa      | <i>Sinycyclocheilus anshuiensis</i> | WA A1 01           | XM 016474588  |                                                 |
|                          |                                     | WA A1              | LAVE01180287  | 36 K                                            |
|                          |                                     | WA A1              | NW 01555379   | 3.3 M contig                                    |
|                          |                                     | WA A2              | LAVE01000366  | 31 K                                            |
|                          |                                     | WA A2              | LAVE01180285  | 36 K                                            |
|                          |                                     | WA A2              | NW 015536465  | 413 K contig                                    |
| goldfish                 | <i>Carassius auratus</i>            | WA 01              | LC198640 *    |                                                 |
| catla                    | <i>Gibelion catla, Catla catla</i>  | WA 01              | GEAE01049160  |                                                 |
| tench                    | <i>Tinca tinca</i>                  | WA 01              | GFZX01071246  |                                                 |
| grass carp               | <i>Otenopharyngodon idella</i>      | WA 01              | GEU001023638  |                                                 |
| fathead minnow           | <i>Pimephales promelas</i>          | WA 01              | JNCD01006382  | 111 K contig                                    |
|                          |                                     | WA 01              | JNCE01056294  | 23 K contig                                     |
| roach minnow             | <i>Rutilus rutilus</i>              | WA 01              | GEBE01046214  | leader, $\alpha 1$ , partial $\alpha 2$         |
|                          |                                     | WA                 | GEBE01046216  | partial $\alpha 2$ , CP/TM/CY                   |
| Amur ide                 | <i>Leuciscus waleckii</i>           | WA 01              | FLSR01004870  | 28 M contig                                     |
| zebrafish                | <i>Danio rerio</i>                  | WA 13A             | NM 001098262  |                                                 |
|                          |                                     | WA 01              | LC198642 *    |                                                 |
|                          |                                     | WA 02              | LC198643 *    |                                                 |
|                          |                                     | WA 03              | LC198644 *    |                                                 |
|                          |                                     | WA 04              | LC198645 *    |                                                 |
|                          |                                     | WA 05              | LC198646 *    |                                                 |
| brown ghost knifefish    | <i>Apteronotus leptorhynchus</i>    | WA 01              | GBKRO10337083 |                                                 |
| black ghost knifefish    | <i>Apteronotus albifrons</i>        | WA 01              | GFID01018756  |                                                 |
| duckbill knifefish       | <i>Parapteronotus hasemani</i>      | WA                 | GGHK01230896  | partial                                         |
|                          |                                     | WA                 | GGHK01278630  | partial                                         |
| glass knifefish          | <i>Eigenmannia virescens</i>        | WA 01              | GGJF01002240  |                                                 |
| Mexican tetra            | <i>Astyanax mexicanus</i>           | WA 01              | XM 007254575  |                                                 |
|                          |                                     | WA 01              | NW 006749376  | 2433 K contig                                   |
|                          |                                     | (fibulin-7 region) | NW 006739147  | 455 K contig                                    |
| tambaqui                 | <i>Colossoma macropomum</i>         | WA 01              | GGHL01010311  |                                                 |
| African coelacanth       | <i>Latimeria chalumnae</i>          | WA 1 01            | XM 006000942  |                                                 |
|                          |                                     | WA1 01             | NW 005819663  | 1088 K contig                                   |
|                          |                                     | (RXRB region)      | NW 005821442  | 322 K contig                                    |
| West African lungfish    | <i>Protopterus annectens</i>        | WA 2 01            | LC198652 *    |                                                 |
| South American lungfish  | <i>Lepidosiren paradoxa</i>         | WA 1 01            | GEHZ01032426  |                                                 |
| Chinese salamander       | <i>Hynobius chinensis</i>           | WA                 | GAQK01112360  | leader, partial $\alpha 1$                      |
|                          |                                     | WA                 | GAQK01026695  | partial $\alpha 2$ , CP/TM/CY                   |
| Hokkaido salamander      | <i>Hynobius retardatus</i>          | WA 01              | LE079167.1    |                                                 |
| tiger salamander         | <i>Ambystoma tigrinum</i>           | WA 01              | LC195223 *    |                                                 |
|                          |                                     | WA 02              | LC195224 *    |                                                 |
| axolotl                  | <i>Ambystoma mexicanum</i>          | WA                 | GFZP01140229  | $\alpha 2$ , CP/TM/CY                           |
|                          |                                     | WA                 | PGSH01013846  | partial, L, $\alpha 2$ , CP/TM/CY, 5397 K       |
|                          |                                     | WA                 | PGSH01122872  | $\alpha 1$                                      |
| WB                       |                                     |                    |               |                                                 |
| banded houndshark        | <i>Triakis scyllium</i>             | WB DS1_n1_01       | AB910510 *    | individual N1, long                             |
|                          |                                     | WB DS1_n1          | AB910511 *    | individual N1, short                            |
|                          |                                     | WB DS1_n1_02       | AB910512 *    | individual N1, long                             |
|                          |                                     | WB DS1_n1          | AB910513 *    | individual N1, short                            |
|                          |                                     | WB DS1_n1_cDNA     | AY227971      | individual N2 (partial)                         |
|                          |                                     | WB DS1_n1          | LC009542 *    | individual N1, genomic PCR                      |
|                          |                                     | WB DS1_n1          | M85291        | individual N0, genomic, $\beta 2$               |
|                          |                                     | WB DS1_n1          | LC200978 *    | individual N0, genomic, $\beta 2$               |
|                          |                                     | WB DS1_n2          | LC200979 *    | individual N0, genomic, $\beta 2$               |
|                          |                                     | WB DS3_01          | LC196165 *    | individual N2                                   |
|                          |                                     | WB DS3_02          | AB910514 *    | individual N1                                   |
|                          |                                     | WB DS3_genomic_1   | LC009543 *    | individual N0, genomic                          |
|                          |                                     | WB DS3_genomic_2   | LC009544 *    | individual N0, genomic PCR                      |
| blue shark               | <i>Prionace glauca</i>              | WB DS1-like        | GFYY01012278  |                                                 |
|                          |                                     | WB DS3-like        | GFYY01033062  |                                                 |
|                          |                                     | WB Nds5L           | GFYY01040305  |                                                 |
| cloudy catshark          | <i>Scyliorhinus torazame</i>        | WB DS1-like        | BFAA01007584  | 159 K contig                                    |
|                          |                                     | WB Nds5L           | BFAA01007584  | 159 K contig                                    |
|                          |                                     | WB Nds5L           | BFAA01011934  | 82 K contig                                     |
| great white shark        | <i>Carcharodon carcharias</i>       | WB DS1-like        | QUOW01001706  | 285 K contig                                    |
|                          |                                     | WB DS3-like        | QUOW01001706  | 285 K contig                                    |
|                          |                                     | WB Nds5L           | QUOW01001706  | 285 K contig                                    |
| whale shark              | <i>Rhincodon typus</i>              | WB DS1-like        | LVEK01262083  | $\beta 2$                                       |
|                          |                                     | WB DS3-like        | LVEK01746520  | $\beta 1$                                       |
| whitespotted bambooshark | <i>Chiloscyllium plagiosum</i>      | WB DS1-like        | QPFF01495858  | $\beta 2$                                       |
|                          |                                     | WB DS3-like        | QPFF01327377  | $\beta 1$                                       |
|                          |                                     | WB DS3-like        | QPFF01162766  | $\beta 2$                                       |
|                          |                                     | WB Nds5L           | QPFF01130085  | $\beta 1$                                       |
|                          |                                     | WB Nds5L           | QPFF01212593  | $\beta 1$                                       |
| brownbanded bambooshark  | <i>Chiloscyllium punctatum</i>      | WB DS1-like        | BEZZ01084999  | $\beta 2$                                       |
|                          |                                     | WB DS3-like        | BEZZ01004761  | $\beta 1$ and $\beta 2$ , contains WA_DS10-like |
|                          |                                     | WB Nds5L           | BEZZ01198256  | $\beta 1$                                       |
|                          |                                     | WB Nds5L           | BEZZ01164644  | $\beta 1$                                       |
|                          |                                     | WB Nds5L           | BEZZ01050759  | $\beta 1$                                       |
|                          |                                     | WB Nds5L           | BEZZ01176133  | $\beta 2$                                       |
|                          |                                     | WB Nds5L           | BEZZ01162851  | $\beta 2$                                       |
| zebra bullhead shark     | <i>Heterodontus zebra</i>           | WB DS1-like        | GGGL01058879  |                                                 |
|                          |                                     | WB DS1-like        | GGGL01058880  |                                                 |
|                          |                                     | WB DS1-like        | GGGL01058881  |                                                 |
|                          |                                     | WB DS1-like        | GGGL01058882  |                                                 |
|                          |                                     | WB DS1-like        | GGGL01058883  |                                                 |
|                          |                                     | WB DS1-like        | GGGL01058886  |                                                 |
|                          |                                     | WB DS1-like        | GGGL01058887  |                                                 |
|                          |                                     | WB Nds5L_1         | GGGL01449143  |                                                 |
|                          |                                     | WB Nds5L_2         | GGGL01449112  |                                                 |
|                          |                                     | WB Nds5L_3         | GGGL01449138  |                                                 |
| spiny dogfish            | <i>Squalus acanthias</i>            | WB DS1-like1       | CV889148      |                                                 |
|                          |                                     | WB DS1-like2       | CX663201      |                                                 |
|                          |                                     | WB DS1-like3       | HAGW01089902  | Fig. S2                                         |
|                          |                                     | WB DS1             | HAGW01089904  |                                                 |
|                          |                                     | WB DS1             | HAGW01089906  |                                                 |
|                          |                                     | WB DS1             | HAGW01089907  |                                                 |
|                          |                                     | WB DS1             | HAGW01089908  |                                                 |
|                          |                                     | WB DS1             | HAGW01089910  |                                                 |
|                          |                                     | WB DS3-like1       | CX196769      | Fig. S2                                         |
|                          |                                     | WB DS3-like2       | ES324258      |                                                 |
|                          |                                     | WB DS3-like3       | ES883357      |                                                 |

|                                |                                     |                               |               |                              |
|--------------------------------|-------------------------------------|-------------------------------|---------------|------------------------------|
| little skate                   | <i>Leucoraja erinacea</i>           | WB DS1-like                   | LTC44319      | partial β1                   |
|                                |                                     | WB DS1-like                   | AESE011933439 | β2                           |
|                                |                                     | WB Nds5L                      | AESE011737676 | β2_partial                   |
| Atlantic herring               | <i>Clupea harengus</i>              | WB 01                         | JZKK01005006  | 34 K contig                  |
|                                |                                     | WB 01                         | O0J01000439   | 344 K contig                 |
| allis shad                     | <i>Alosa alosa</i>                  | WB 01                         | GETY01036995  |                              |
|                                |                                     | WB 01                         | GETY01018251  |                              |
| Hilsa shad                     | <i>Tenualosa ilisha</i>             | WB 01                         | QYSC01123695  | 325 K contig                 |
| oriental weatherfish (Dojo)    | <i>Misgurnus anguillicaudatus</i>   | WB                            | GAAD01004277  | partial                      |
| white sucker                   | <i>Catostomus commersonii</i>       | WB 01                         | GEEX01114064  | partial                      |
| common carp                    | <i>Cyprinus carpio</i>              | WB B1                         | LN590696      | 26 M contig Songpu strain    |
|                                |                                     | WB B1                         | LN598268      | 890 K contig Songpu strain   |
|                                |                                     | WB B1 01                      | LHQPO1015169  | 107 K contig European strain |
|                                |                                     | WB B2                         | LN594648      | 138 K contig Songpu strain   |
|                                |                                     | WB B2                         | LHQPO1028415  | 82 K contig European strain  |
| Chinese cavefish Sg            | <i>Sinycyclocheilus grahami</i>     | WB B1 01                      | XM 016288788  |                              |
|                                |                                     | WB B1                         | XM 016288789  |                              |
|                                |                                     | WB B1                         | LCYQ01031371  | 102 K contig                 |
|                                |                                     | WB B1                         | NW 015505413  | 2.6 M contig                 |
|                                |                                     | WB B2 01                      | XM 016263664  |                              |
|                                |                                     | WB B2                         | LCYQ01125997  | 2 K                          |
| Chinese cavefish Sr            | <i>Sinycyclocheilus rhinoceros</i>  | WB B1 01                      | XM 016571072  |                              |
|                                |                                     | WB B1                         | LAVF01079966  | 64 K                         |
|                                |                                     | WB B1                         | NW 015641068  | 124 K contig                 |
|                                |                                     | WB B2 01                      | XM 016544920  |                              |
|                                |                                     | WB B2                         | LAVF01191476  | 50 K                         |
|                                |                                     | WB B2                         | NW 015666971  | 1.2 M contig                 |
| Chinese cavefish Sa            | <i>Sinycyclocheilus anshuiensis</i> | WB B1 01                      | XM 016474614  |                              |
|                                |                                     | WB B1                         | LAVE01180285  | 36 K                         |
|                                |                                     | WB B1                         | NW 015557379  | 3.3 M contig                 |
|                                |                                     | WB B2 01                      | XM 016486958  |                              |
|                                |                                     | WB B2                         | LAVE01000366  | 31 K                         |
|                                |                                     | WB B2                         | NW 015536465  | 413 K contig                 |
| goldfish                       | <i>Carassius auratus</i>            | WB 01                         | LC198641 *    |                              |
| catla                          | <i>Gibelion catla, Catla catla</i>  | WB 01                         | GEAE01019557  |                              |
| tench                          | <i>Tinca tinca</i>                  | WB 01                         | GFZX01039606  |                              |
| grass carp                     | <i>Ctenopharyngodon idella</i>      | WB 01                         | GBKA01001259  |                              |
|                                |                                     | WB                            | GEUQ01052457  |                              |
| fathead minnow                 | <i>Pimephales promelas</i>          | WB 01                         | JNCD01006382  | 111 K contig                 |
|                                |                                     | WB                            | JNCE01056294  | 23 K contig                  |
| roach minnow                   | <i>Rutilus rutilus</i>              | WB                            | GEBE01052260  | β1_partial β2                |
|                                |                                     | WB                            | GEBE01052261  | partial β2, CP/TM            |
| Amur ide                       | <i>Leuciscus waleckii</i>           | WB 01                         | FLSR01004870  | 28 M contig                  |
| zebrafish                      | <i>Danio rerio</i>                  | WB 13B                        | XM 001342488  | genomic                      |
|                                |                                     | WB 01                         | LC198647 *    |                              |
|                                |                                     | WB 02                         | LC198648 *    |                              |
|                                |                                     | WB 03                         | LC198649 *    | partial                      |
|                                |                                     | WB 04                         | LC198650 *    | partial                      |
|                                |                                     | WB 05                         | LC198651 *    |                              |
| brown ghost knifefish          | <i>Apteronotus leptorhynchus</i>    | WB 01                         | GBKR010051454 |                              |
| black ghost knifefish          | <i>Apteronotus albifrons</i>        | WB 01                         | GFID01018754  |                              |
| duckbill knifefish             | <i>Parapteronotus hasemani</i>      | WB                            | GGHK01160239  | partial                      |
| Mexican tetra                  | <i>Astyanax mexicanus</i>           | WB 01                         | XM 007254556  |                              |
|                                |                                     | WB                            | NW 006749376  | 2433 K contig                |
| tambaqui                       | <i>Colossoma macropomum</i>         | WB 01                         | GGHL01049603  |                              |
| African coelacanth             | <i>Latimeria chalumnae</i>          | WB 1_01                       | XM 014491414  | partial                      |
|                                |                                     | WB 1                          | NW 005819663  | 1088 K contig, except leader |
|                                |                                     | WB 1                          | BAH001266725  | 28 K, leader                 |
| West African lungfish          | <i>Protopterus annectens</i>        | WB 2_1_01                     | LC198653 *    |                              |
| South American lungfish        | <i>Lepidosiren paradoxa</i>         | WB 1_01                       | GEH201040013  |                              |
| Chinese salamander             | <i>Hynobius chinensis</i>           | WB                            | GAQK01112360  | leader, partial β1           |
|                                |                                     | WB                            | GAQK01119707  | partial β1, β2, CP/TM/CY     |
| Hokkaido salamander            | <i>Hynobius retardatus</i>          | WB 01                         | LE079819      |                              |
| tiger salamander               | <i>Ambystoma tigrinum</i>           | WB 01                         | LC195225 *    |                              |
|                                |                                     | WB 02                         | LC195226 *    |                              |
| axolotl                        | <i>Ambystoma mexicanum</i>          | WB 01                         | GFZP01045381  |                              |
|                                |                                     | WB                            | PGSH01013846  | partial, 5397 K contig       |
| class IIA classical            | nurse shark                         | <i>Ginglymostoma cirratum</i> | class IIA     | M89950                       |
|                                | elephant shark                      | <i>Callorhynchus milii</i>    | class IIA     | JX211142                     |
|                                | Atlantic salmon                     | <i>Salmo salar</i>            | class IIA     | L77086                       |
|                                | zebrafish                           | <i>Danio rerio</i>            | class IIA     | NM_001007205                 |
|                                | African coelacanth                  | <i>Latimeria chalumnae</i>    | class IIA     | XM 006014225                 |
|                                | Chinese giant salamander            | <i>Andrias davidianus</i>     | Anda-DAA*0101 | KF611846                     |
|                                | African clawed frog                 | <i>Xenopus laevis</i>         | class IIA     | AF454374                     |
|                                | chicken                             | <i>Gallus gallus</i>          | class IIA     | AY357253                     |
|                                | gray short-tailed opossum           | <i>Monodelphis domestica</i>  | class IIA     | XM 001376714                 |
|                                | house mouse                         | <i>Mus musculus</i>           | H2-Aa         | NM 010378                    |
|                                | human                               | <i>Homo sapiens</i>           | HLA-DPA1      | NM 033554                    |
|                                | human                               | <i>Homo sapiens</i>           | HLA-DQA1      | NM 002122                    |
|                                | human                               | <i>Homo sapiens</i>           | HLA-DRA       | NM 019111                    |
|                                | human                               | <i>Homo sapiens</i>           | HLA-DRA       | NG 002392                    |
|                                | human                               | <i>Homo sapiens</i>           | HLA-DQA       | NM 002119                    |
| DOA                            | house mouse                         | <i>Mus musculus</i>           | H2-Oa         | NM 008206                    |
| class IIA nonclassical teleost | Atlantic salmon                     | <i>Salmo salar</i>            | Sasa-DBA      | EG757342                     |
|                                | Atlantic salmon                     | <i>Salmo salar</i>            | Sasa-DCA      | DW549478                     |
|                                | Atlantic salmon                     | <i>Salmo salar</i>            | Sasa-DDA      | DW557800                     |
|                                | Atlantic salmon                     | <i>Salmo salar</i>            | Sasa-DEA*0102 | KC316032                     |
|                                | Japanese medaka                     | <i>Oryzias latipes</i>        | M5A           | ENSORLG00000012794           |
|                                | Japanese medaka                     | <i>Oryzias latipes</i>        | M16A          | ENSORLP00000011499           |
|                                | stickleback                         | <i>Gasterosteus aculeatus</i> | GXVIIA        | ENSQACG00000003731           |
|                                | tilapia                             | <i>Oreochromis niloticus</i>  | O57A          | ENSONIG00000002263           |
|                                | zebrafish                           | <i>Danio rerio</i>            | D8.45A1       | ENSNDARG00000079593          |
|                                | zebrafish                           | <i>Danio rerio</i>            | D8.46A        | ENSNDARG00000079592          |
| DMA                            | Hokkaido salamander                 | <i>Hynobius retardatus</i>    | DMA-like      | LE161217                     |
|                                | African clawed frog                 | <i>Xenopus laevis</i>         | DMA           | BC061681                     |
|                                | green anole                         | <i>Anolis carolinensis</i>    | DMA           | XM 008109234                 |
|                                | chicken                             | <i>Gallus gallus</i>          | BMA1          | NM 001099353                 |
|                                | gray short-tailed opossum           | <i>Monodelphis domestica</i>  | DMA           | XM 007483660                 |
|                                | house mouse                         | <i>Mus musculus</i>           | H2-Dma        | NM 010386                    |
|                                | human                               | <i>Homo sapiens</i>           | HLA-DMA       | NM 006120                    |

|                           |                                |                                  |                                |                      |                            |  |
|---------------------------|--------------------------------|----------------------------------|--------------------------------|----------------------|----------------------------|--|
| class IIB classical       | nurse shark                    | <i>Ginglymostoma cirratum</i>    | class IIB                      | L20274               |                            |  |
|                           | Atlantic salmon                | <i>Salmo salar</i>               | class IIB                      | X70166               |                            |  |
|                           | zebrafish                      | <i>Danio rerio</i>               | DAB                            | NM 131476            |                            |  |
|                           | African coelacanth             | <i>Latimeria chalumnae</i>       | class IIB                      | XM 006010528         |                            |  |
|                           | Chinese giant salamander       | <i>Andrias davidianus</i>        | Anda-DAB*0101                  | KF611873             |                            |  |
|                           | axolotl                        | <i>Ambystoma mexicanum</i>       | Amme-DAB B1.021                | AF209115             |                            |  |
|                           | African clawed frog            | <i>Xenopus laevis</i>            | class IIB                      | D13688               |                            |  |
|                           | chicken                        | <i>Gallus gallus</i>             | BLB1                           | NM 001044694         |                            |  |
|                           | gray short-tailed opossum      | <i>Monodelphis domestica</i>     | MOD0-DAB1                      | NM 001032991         |                            |  |
|                           | house mouse                    | <i>Mus musculus</i>              | H2-Ab1                         | NM 207105            |                            |  |
|                           | human                          | <i>Homo sapiens</i>              | HLA-DPB1                       | NM 002121            |                            |  |
|                           | human                          | <i>Homo sapiens</i>              | HLA-DQB1                       | NM 002123            |                            |  |
|                           | human                          | <i>Homo sapiens</i>              | HLA-DRB1                       | NM 002124            |                            |  |
|                           | human                          | <i>Homo sapiens</i>              | HLA-DRB3                       | NG 002392            | used in Fig. 5             |  |
|                           | house mouse                    | <i>Mus musculus</i>              | H2-Ob                          | NM 010389            |                            |  |
|                           | human                          | <i>Homo sapiens</i>              | HLA-OB                         | NM 002120            |                            |  |
|                           | class IIB nonclassical teleost | Atlantic salmon                  | <i>Salmo salar</i>             | Sasa-DBB             | DY726096                   |  |
| Atlantic salmon           |                                | <i>Salmo salar</i>               | Sasa-DCB*0103                  | KC316031             |                            |  |
| Atlantic salmon           |                                | <i>Salmo salar</i>               | Sasa-DEB*0102                  | KC316036             |                            |  |
| Japanese medaka           |                                | <i>Oryzias latipes</i>           | M5B1                           | ENSORL G00000012822  |                            |  |
| Japanese medaka           |                                | <i>Oryzias latipes</i>           | M16B                           | ENSORL G00000009164  |                            |  |
| stickleback               |                                | <i>Gasterosteus aculeatus</i>    | GXVIII                         | ENSGACG00000003680   |                            |  |
| tilapia                   |                                | <i>Oreochromis niloticus</i>     | O57B                           | ENSONIG00000002259   |                            |  |
| swordtail fish            |                                | <i>Xiphophorus multilineatus</i> | DXB*04                         | AY671988             |                            |  |
| zebrafish                 |                                | <i>Danio rerio</i>               | D8 45B1                        | ENSDARG00000041705   |                            |  |
| zebrafish                 |                                | <i>Danio rerio</i>               | D8 45B2                        | ENSDARG00000088872   |                            |  |
| axolotl                   |                                | <i>Ambystoma mexicanum</i>       | DMB-like                       | isotig117813         |                            |  |
| African clawed frog       |                                | <i>Xenopus laevis</i>            | DMB                            | DQ268506             |                            |  |
| green anole               |                                | <i>Anolis carolinensis</i>       | DMB                            | XM 008124369         |                            |  |
| chicken                   | <i>Gallus gallus</i>           | DMB                              | NM 001135166                   |                      |                            |  |
| gray short-tailed opossum | <i>Monodelphis domestica</i>   | DMB                              | XM 007483659                   |                      |                            |  |
| house mouse               | <i>Mus musculus</i>            | H2-DMb1                          | NM 010387                      |                      |                            |  |
| human                     | <i>Homo sapiens</i>            | HLA-DMB                          | NM 002118                      |                      |                            |  |
| class I classical         | banded houndshark              | <i>Triakis scyllium</i>          | Trsc-UAA 101                   | AF034316             |                            |  |
|                           | spiny dogfish                  | <i>Squalus acanthias</i>         | class I classical type         | AY150811             |                            |  |
|                           | nurse shark                    | <i>Ginglymostoma cirratum</i>    | class I classical              | AF220063             |                            |  |
|                           | clearnose skate                | <i>Raja eglanteria</i>           | class I classical type         | KC335152             |                            |  |
|                           | elephant shark                 | <i>Callorhynchus milii</i>       | class I classical type         | JX207562             |                            |  |
|                           | Atlantic salmon                | <i>Salmo salar</i>               | UBA*0101                       | AF504019             |                            |  |
|                           | Atlantic salmon                | <i>Salmo salar</i>               | UBA*0301                       | AF504022             |                            |  |
|                           | common carp                    | <i>Cyprinus carpio</i>           | Cyca-UA1*01                    | X91015               |                            |  |
|                           | African coelacanth             | <i>Latimeria chalumnae</i>       | Lach-UA-01                     | U08043               | used in Datasets S2 and S3 |  |
|                           | African coelacanth             | <i>Latimeria chalumnae</i>       | class I classical type         | XM 006013358         | used in Dataset S1         |  |
|                           | Chinese giant salamander       | <i>Andrias davidianus</i>        | Anda-UAA*0101                  | KF611820             |                            |  |
|                           | African clawed frog            | <i>Xenopus laevis</i>            | Xela UAA1f                     | L20733               |                            |  |
|                           | tuatara                        | <i>Sphenodon punctatus</i>       | Sppu-U*01                      | DQ145788             |                            |  |
|                           | common iguana                  | <i>Iguana iguana</i>             | Igig-UB*0101                   | EU604317             |                            |  |
|                           | chicken                        | <i>Gallus gallus</i>             | Gaga BF12                      | M31012               |                            |  |
|                           | gray short-tailed opossum      | <i>Monodelphis domestica</i>     | MOD0 UB                        | NM 001079820         |                            |  |
|                           | house mouse                    | <i>Mus musculus</i>              | H2-K1                          | NM 001001892         |                            |  |
|                           | human                          | <i>Homo sapiens</i>              | HLA-A*0201                     | AY365426             |                            |  |
|                           | human                          | <i>Homo sapiens</i>              | HLA-A                          | NG 029217            | used in Fig. 5             |  |
|                           | class I nonclassical           | spiny dogfish                    | <i>Squalus acanthias</i>       | class I nonclassical | AF515705                   |  |
|                           |                                | rainbow trout                    | <i>Oncorhynchus mykiss</i>     | Omyr-UAA             | AF091779                   |  |
|                           |                                | zebrafish                        | <i>Danio rerio</i>             | ZE                   | NM 194425                  |  |
|                           |                                | marbled lungfish                 | <i>Protopterus aethiopicus</i> | ZE                   | AF206309                   |  |
|                           |                                | African coelacanth               | <i>Latimeria chalumnae</i>     | Lach UB 01           | U08034                     |  |
|                           |                                | axolotl                          | <i>Ambystoma mexicanum</i>     | class I nonclassical | U83137                     |  |
|                           |                                | African clawed frog              | <i>Xenopus laevis</i>          | class I nonclassical | M58019                     |  |
|                           |                                | chicken                          | <i>Gallus gallus</i>           | YF5                  | NM 001030675               |  |
|                           |                                | gray short-tailed opossum        | <i>Monodelphis domestica</i>   | MR1                  | AB719956                   |  |
|                           |                                | human MR1                        | <i>Homo sapiens</i>            | MR1                  | NM 001531                  |  |
|                           |                                | human HFE                        | <i>Homo sapiens</i>            | HFE                  | U60319                     |  |
|                           |                                | human ZAG                        | <i>Homo sapiens</i>            | AZGP1 (ZAG)          | NM 001185                  |  |
|                           |                                | human MICA                       | <i>Homo sapiens</i>            | MICA                 | NM 000247                  |  |
|                           |                                | common brushtail possum          | <i>Trichosurus vulpecula</i>   | FCGN                 | AF191647                   |  |
| human                     |                                | <i>Homo sapiens</i>              | FCGRT (FcRn)                   | NM 001136019         |                            |  |
| chicken                   |                                | <i>Gallus gallus</i>             | CD1.2                          | AY849320             |                            |  |
| northern brown bandicoot  |                                | <i>Isodon macrourus</i>          | CD1                            | DQ924533             |                            |  |
| human                     |                                | <i>Homo sapiens</i>              | CD1A                           | NM 001763            |                            |  |
| human                     |                                | <i>Homo sapiens</i>              | CD1D                           | NM 001766            |                            |  |
| human                     |                                | <i>Homo sapiens</i>              | HLA-E                          | NM 005516            |                            |  |
| human                     |                                | <i>Homo sapiens</i>              | HLA-F                          | NM_001098479         |                            |  |
| human                     |                                | <i>Homo sapiens</i>              | HLA-G                          | NM 002127            |                            |  |
| β2-m                      |                                | banded hounshark                 | <i>Triakis scyllium</i>        | b2m                  | HQ630063                   |  |
|                           |                                | sandbar shark                    | <i>Carcharhinus plumbeus</i>   | b2m                  | GQ865620                   |  |
|                           |                                | nurse shark                      | <i>Ginglymostoma cirratum</i>  | b2m                  | HM625831                   |  |
|                           |                                | spiny dogfish                    | <i>Squalus acanthias</i>       | b2m                  | CX197536                   |  |
|                           |                                | little skate                     | <i>Leucoraja erinacea</i>      | b2m                  | DT045428                   |  |
|                           |                                | clearnose skate                  | <i>Raja eglanteria</i>         | b2m                  | AF520476                   |  |
|                           |                                | elephant shark                   | <i>Callorhynchus milii</i>     | b2m                  | JW878642                   |  |
|                           |                                | Siberian sturgeon                | <i>Acipenser baerii</i>        | b2m                  | AJ132766                   |  |
|                           |                                | common carp                      | <i>Cyprinus carpio</i>         | b2m                  | L05536                     |  |
|                           |                                | zebrafish                        | <i>Danio rerio</i>             | b2m                  | NM 131163                  |  |
|                           |                                | zebrafish                        | <i>Danio rerio</i>             | b2m-like             | NM 213126                  |  |
|                           | channel catfish                | <i>Ictalurus punctatus</i>       | b2m                            | AF016041             |                            |  |
|                           | Japanese medaka                | <i>Oryzias latipes</i>           | b2m                            | NM 001104660         |                            |  |
|                           | Japanese medaka                | <i>Oryzias latipes</i>           | b2m-like                       | XM 004082991         |                            |  |
|                           | Indonesian coelacanth          | <i>Latimeria menadoensis</i>     | b2m-like                       | GAPS01030276         |                            |  |
|                           | Chinese giant salamander       | <i>Andrias davidianus</i>        | b2m                            | KF611890             |                            |  |
|                           | African clawed frog            | <i>Xenopus laevis</i>            | b2m                            | AF217962             |                            |  |
|                           | green anole                    | <i>Anolis carolinensis</i>       | b2m                            | XM 003227482         |                            |  |
|                           | chicken                        | <i>Gallus gallus</i>             | b2m                            | AY989898             |                            |  |
|                           | platypus                       | <i>Ornithorhynchus anatinus</i>  | b2m                            | NM 001127618         |                            |  |
|                           | gray short-tailed opossum      | <i>Monodelphis domestica</i>     | b2m                            | AY125947             |                            |  |
|                           | house mouse                    | <i>Mus musculus</i>              | b2m                            | NM 009735            |                            |  |
|                           | human                          | <i>Homo sapiens</i>              | b2m                            | AB021288             |                            |  |
|                           | human                          | <i>Homo sapiens</i>              | b2m                            | NG 012920            | used in Fig. 5             |  |
|                           | IgM                            | house mouse                      | <i>Mus musculus</i>            | IgM_CH4              | 4JVV A                     |  |
|                           |                                | human                            | <i>Homo sapiens</i>            | IgM_CH4              | CAA47708                   |  |
|                           | TCRB                           | house mouse                      | <i>Mus musculus</i>            | TCRB                 | AAA40199                   |  |
|                           |                                | human                            | <i>Homo sapiens</i>            | TCRB                 | 10GA E                     |  |
|                           | tapasin                        | house mouse                      | <i>Mus musculus</i>            | tapasin              | NM 001025313               |  |
|                           |                                | human                            | <i>Homo sapiens</i>            | tapasin              | NM 003190                  |  |
|                           | Genome Information             |                                  |                                |                      | Assembly                   |  |
|                           |                                | Mexican tetra                    | <i>Astyanax mexicanus</i>      | genome               | Astyanax_mexicanus-2.0     |  |
|                           |                                | zebrafish                        | <i>Danio rerio</i>             | genome               | GRCz11                     |  |
| human                     | <i>Homo sapiens</i>            | genome                           | GRC38.p13                      |                      |                            |  |

Table S4

| position | N  | Nd | Nc | V    |
|----------|----|----|----|------|
| 1        | 23 | 2  | 21 | 2.2  |
| 2        | 24 | 1  | 24 | 1    |
| 3        | 24 | 4  | 13 | 7.4  |
| 4        | 24 | 4  | 17 | 5.6  |
| 5        | 24 | 2  | 21 | 2.3  |
| 6        | 24 | 2  | 20 | 2.4  |
| 7        | 24 | 2  | 13 | 3.7  |
| 8        | 24 | 3  | 21 | 3.4  |
| 9        | 24 | 3  | 21 | 3.4  |
| 10       | 24 | 1  | 24 | 1    |
| 11       | 24 | 1  | 24 | 1    |
| 12       | 24 | 1  | 24 | 1    |
| 13       | 24 | 6  | 16 | 9    |
| 15       | 24 | 4  | 11 | 8.7  |
| 16       | 24 | 4  | 9  | 10.7 |
| 17       | 24 | 4  | 18 | 5.3  |
| 18       | 24 | 2  | 19 | 2.5  |
| 19       | 24 | 3  | 22 | 3.3  |
| 20       | 24 | 3  | 9  | 8    |
| 21       | 24 | 2  | 19 | 2.5  |
| 22       | 24 | 1  | 24 | 1    |
| 23       | 24 | 3  | 12 | 6    |
| 24       | 24 | 2  | 23 | 2.1  |
| 25       | 24 | 2  | 20 | 2.4  |
| 26       | 24 | 1  | 24 | 1    |
| 27       | 24 | 1  | 24 | 1    |
| 28       | 24 | 1  | 24 | 1    |
| 29       | 24 | 1  | 24 | 1    |
| 30       | 24 | 2  | 12 | 4    |
| 31       | 24 | 3  | 19 | 3.8  |
| 32       | 24 | 4  | 8  | 12   |
| 33       | 24 | 1  | 24 | 1    |
| 34       | 24 | 1  | 24 | 1    |
| 35       | 24 | 2  | 23 | 2.1  |
| 36       | 24 | 1  | 24 | 1    |
| 37       | 24 | 2  | 19 | 2.5  |
| 38       | 24 | 4  | 16 | 6    |
| 39       | 24 | 7  | 8  | 21   |
| 42       | 24 | 5  | 10 | 12   |
| 43       | 24 | 3  | 17 | 4.2  |
| 44       | 24 | 2  | 23 | 2.1  |
| 45       | 24 | 1  | 24 | 1    |
| 46       | 24 | 4  | 14 | 6.9  |
| 47       | 24 | 1  | 24 | 1    |
| 48       | 25 | 3  | 23 | 3.3  |
| 49       | 25 | 1  | 25 | 1    |
| 50       | 25 | 2  | 22 | 2.3  |
| 51       | 25 | 2  | 24 | 2.1  |
| 52       | 25 | 3  | 18 | 4.2  |
| 53       | 25 | 4  | 21 | 4.8  |
| 54a      | 24 | 1  | 24 | 1    |
| 54b      | 25 | 1  | 25 | 1    |
| 55a      | 25 | 1  | 25 | 1    |
| 55b      | 25 | 2  | 22 | 2.3  |
| 55c      | 25 | 1  | 25 | 1    |
| 56       | 25 | 4  | 21 | 4.8  |
| 57       | 25 | 8  | 6  | 33.3 |
| 58       | 25 | 7  | 11 | 15.9 |
| 59       | 25 | 3  | 19 | 3.9  |
| 60       | 25 | 3  | 13 | 5.8  |
| 61       | 25 | 5  | 12 | 10.4 |
| 62       | 25 | 3  | 20 | 3.8  |
| 63       | 25 | 1  | 25 | 1    |
| 64       | 25 | 3  | 10 | 7.5  |
| 65       | 25 | 7  | 8  | 21.9 |
| 66       | 25 | 2  | 24 | 2.1  |
| 67       | 25 | 1  | 25 | 1    |
| 68       | 25 | 4  | 14 | 7.1  |
| 69       | 25 | 8  | 9  | 22.2 |
| 70       | 25 | 3  | 20 | 3.8  |
| 71       | 25 | 2  | 24 | 2.1  |
| 72       | 26 | 4  | 16 | 6.5  |
| 73       | 26 | 1  | 26 | 1    |
| 74       | 26 | 1  | 26 | 1    |
| 75       | 26 | 6  | 8  | 19.5 |
| 76       | 26 | 5  | 11 | 11.8 |
| 77       | 26 | 2  | 25 | 2.1  |
| 78       | 26 | 3  | 23 | 3.4  |
| 79       | 26 | 4  | 12 | 8.7  |
| 80       | 26 | 2  | 24 | 2.2  |
| 81       | 26 | 2  | 25 | 2.1  |
| 82       | 26 | 3  | 18 | 4.3  |
| 83       | 26 | 5  | 14 | 9.3  |
| 84       | 26 | 5  | 15 | 8.7  |
| 85       | 26 | 2  | 21 | 2.5  |
| 86       | 26 | 6  | 15 | 10.4 |
| 87       | 24 | 5  | 13 | 9.2  |
| 88       | 26 | 4  | 14 | 7.4  |
| 89       | 26 | 4  | 20 | 5.2  |
| 90a      | 26 | 4  | 16 | 6.5  |
| 90b      | 26 | 4  | 14 | 7.4  |
| 90c      | 26 | 4  | 14 | 7.4  |

| position | N  | Nd | Nc | V    |
|----------|----|----|----|------|
| 91       | 19 | 2  | 11 | 3.5  |
| 92       | 22 | 1  | 22 | 1    |
| 93       | 22 | 3  | 13 | 5.1  |
| 94       | 22 | 2  | 17 | 2.6  |
| 95       | 22 | 2  | 21 | 2.1  |
| 96       | 22 | 1  | 22 | 1    |
| 97       | 22 | 1  | 22 | 1    |
| 98       | 22 | 3  | 17 | 3.9  |
| 99       | 22 | 1  | 22 | 1    |
| 100      | 22 | 2  | 16 | 2.8  |
| 101      | 22 | 1  | 22 | 1    |
| 102      | 22 | 3  | 20 | 3.3  |
| 103      | 22 | 2  | 21 | 2.1  |
| 104      | 22 | 2  | 19 | 2.3  |
| 105      | 22 | 4  | 10 | 8.8  |
| 106      | 22 | 5  | 10 | 11   |
| 107      | 22 | 2  | 21 | 2.1  |
| 109      | 22 | 3  | 17 | 3.9  |
| 110      | 22 | 5  | 18 | 6.1  |
| 111      | 22 | 5  | 8  | 13.8 |
| 112      | 22 | 3  | 12 | 5.5  |
| 113      | 22 | 4  | 15 | 5.9  |
| 114      | 22 | 1  | 22 | 1    |
| 115      | 22 | 5  | 17 | 6.5  |
| 116      | 22 | 1  | 22 | 1    |
| 117      | 22 | 1  | 22 | 1    |
| 118      | 22 | 2  | 18 | 2.4  |
| 119      | 22 | 2  | 13 | 3.4  |
| 120      | 22 | 4  | 14 | 6.3  |
| 121      | 22 | 3  | 14 | 4.7  |
| 122      | 22 | 2  | 21 | 2.1  |
| 123      | 22 | 2  | 20 | 2.2  |
| 124      | 22 | 2  | 21 | 2.1  |
| 125      | 22 | 4  | 17 | 5.2  |
| 126      | 22 | 2  | 18 | 2.4  |
| 127      | 22 | 1  | 22 | 1    |
| 128      | 22 | 2  | 20 | 2.2  |
| 129      | 22 | 7  | 9  | 17.1 |
| 130      | 22 | 4  | 14 | 6.3  |
| 131      | 22 | 2  | 18 | 2.4  |
| 132      | 22 | 2  | 16 | 2.8  |
| 133      | 22 | 2  | 18 | 2.4  |
| 134      | 22 | 2  | 20 | 2.2  |
| 135      | 22 | 3  | 15 | 4.4  |
| 136      | 22 | 2  | 19 | 2.3  |
| 137      | 22 | 1  | 22 | 1    |
| 138      | 22 | 3  | 15 | 4.4  |
| 139      | 22 | 6  | 11 | 12   |
| 140      | 22 | 1  | 22 | 1    |
| 141      | 23 | 6  | 8  | 17.3 |
| 142      | 23 | 4  | 10 | 9.2  |
| 143      | 23 | 2  | 18 | 2.6  |
| 144      | 23 | 3  | 17 | 4.1  |
| 145      | 23 | 3  | 20 | 3.5  |
| 146      | 23 | 2  | 22 | 2.1  |
| 147      | 23 | 1  | 23 | 1    |
| 148      | 23 | 2  | 19 | 2.4  |
| 149      | 23 | 3  | 18 | 3.8  |
| 150b     | 23 | 6  | 13 | 10.6 |
| 151      | 23 | 7  | 15 | 10.7 |
| 152      | 23 | 1  | 23 | 1    |
| 153      | 23 | 2  | 18 | 2.6  |
| 154      | 23 | 5  | 17 | 6.8  |
| 155      | 23 | 6  | 13 | 10.6 |
| 156      | 23 | 1  | 23 | 1    |
| 157      | 23 | 2  | 20 | 2.3  |
| 158      | 23 | 7  | 10 | 16.1 |
| 159      | 23 | 2  | 15 | 3.1  |
| 160      | 23 | 1  | 23 | 1    |
| 161      | 23 | 7  | 7  | 23   |
| 162      | 23 | 4  | 14 | 6.6  |
| 163      | 23 | 3  | 16 | 4.3  |
| 164      | 23 | 1  | 23 | 1    |
| 165      | 23 | 2  | 22 | 2.1  |
| 166      | 23 | 1  | 23 | 1    |
| 167      | 23 | 1  | 23 | 1    |
| 168      | 23 | 4  | 13 | 7.1  |
| 169      | 23 | 2  | 22 | 2.1  |
| 170      | 23 | 1  | 23 | 1    |
| 171      | 23 | 1  | 23 | 1    |
| 172      | 23 | 4  | 18 | 5.1  |
| 173      | 23 | 4  | 13 | 7.1  |
| 174      | 23 | 1  | 23 | 1    |
| 176      | 23 | 1  | 23 | 1    |
| 177      | 23 | 2  | 19 | 2.4  |
| 178      | 23 | 2  | 21 | 2.2  |
| 179      | 23 | 1  | 23 | 1    |
| 180      | 23 | 1  | 23 | 1    |
| 181      | 23 | 3  | 19 | 3.6  |
| 182      | 23 | 3  | 20 | 3.5  |



**Table S4. Conservation profile of the membrane-distal domains of W-category molecules in the teleost fish.**

Variabilities of the WA  $\alpha$ 1 domain (left, positions 1-90c) and WB  $\beta$ 1 domain (right, positions 91-182) are shown. Wu-Kabat variability (V) is defined as the number of different amino acids at a given position (Nd) divided by the frequency of the most common amino acid at that position ( $N_c/N$ ;  $N_c$ , the number of the most common amino acid at that position; N, the number of sequences studied at that position) as described in the Materials and Methods. The position numbers are based on those of the HLA-A2 molecule (29; Fig. S21). Position numbers with a, b or c are used where sequence length disparities are present between the HLA-A2 and teleost fish W-category molecules. The sequence alignment is based on Dataset S1. The values of Wu-Kabat variability are classified with various colors as follows: red, 1.0 (invariable); orange, 2.1 - 2.5 (relatively highly conserved); white,  $2.6 \leq V < 4$  (moderately conserved/variable); blue,  $V < 4$  (highly variable).

## References

1. M. Nei, A. P. Rooney, Concerted and birth-and-death evolution of multigene families. *Annu. Rev. Genet.* **39**, 121-152 (2005).
2. J. Trowsdale, J. C. Knight, Major Histocompatibility Complex genomics and human disease. *Annu. Rev. Genomics Hum. Genet.* **14**, 301-323 (2013).
3. M. Wieczorek, E. T. Abualrous, J. Sticht, M. Alvaro-Benito, S. Stolzenberg, F. Noe, C. Freund, Major Histocompatibility Complex (MHC) Class I and MHC Class II proteins: Conformational plasticity in antigen presentation. *Front. Immunol.* **8**, 292 (2017).
4. J. F. Kaufman, C. Auffray, A. J. Korman, D. A. Shackelford, J. Strominger, The class II molecules of the human and murine major histocompatibility complex. *Cell* **36**, 1-13 (1984).
5. L. Hood, M. Kronenberg, T. Hunkapiller, T cell antigen receptors and the immunoglobulin supergene family. *Cell* **40**, 225-229 (1985).
6. L. H. Martin, F. Calabi, C. Milstein, Isolation of CD1 genes: a family of major histocompatibility complex-related differentiation antigens. *Proc. Natl. Acad. Sci. USA* **83**, 9154-9158 (1986).
7. J. Kaufman, Vertebrates and the evolution of the Major Histocompatibility Complex (MHC) class I and class II molecules. *Verh. Dtsch. Zool. Ges.* **81**, 131-144 (1988).
8. D. A. Lawlor, J. Zemmour, P. D. Ennis, P. Parham, Evolution of class-I MHC genes and proteins: from natural selection to thymic selection. *Annu. Rev. Immunol.* **8**, 23-63 (1990).
9. M. F. Flajnik, C. Canel, J. Kramer, M. Kasahara, Which came first, MHC class I or class II? *Immunogenetics* **33**, 295-300 (1991).
10. A. L. Hughes, M. Nei, Evolutionary relationships of the classes of major histocompatibility complex genes. *Immunogenetics* **37**, 337-346 (1993).
11. J. Klein, C. O'hUigin, Composite origin of major histocompatibility complex genes. *Curr. Opin. Genet. Dev.* **3**, 923-930 (1993).
12. J. Klein, N. Nikolaidis, The descent of the antibody-based immune system by gradual evolution. *Proc.*

- Natl. Acad. Sci. USA* **102**, 169-174 (2005).
13. S. A. Porcelli, Bird genes give new insights into the origins of lipid antigen presentation. *Proc. Natl. Acad. Sci. USA*. **102**, 8399-8400 (2005).
  14. M. F. Flajnik, L. Du Pasquier, "Evolution of the immune system." in *Fundamental Immunology* (Lippincott Williams & Wilkins, ed. 7, 2013).
  15. J. Kaufman, Unfinished business: Evolution of the MHC and the adaptive immune system of jawed vertebrates. *Annu. Rev. Immunol.* **36**, 383-409 (2018).
  16. K. Hashimoto, T. Nakanishi, Y. Kurosawa, Isolation of carp genes encoding major histocompatibility complex antigens. *Proc. Natl. Acad. Sci. USA*. **87**, 6863-6867 (1990).
  17. K. Okamura, M. Ototake, T. Nakanishi, Y. Kurosawa, K. Hashimoto, The most primitive vertebrates with jaws possess highly polymorphic MHC class I genes comparable to those of humans. *Immunity* **7**, 777-790 (1997).
  18. S. Bartl, M. A. Baish, M. F. Flajnik, Y. Ohta, Identification of class I genes in cartilaginous fish, the most ancient group of vertebrates displaying an adaptive immune response. *J. Immunol.* **159**, 6097-6104 (1997).
  19. J. P. Cannon, R. N. Haire, G. W. Litman, Identification of diversified genes that contain immunoglobulin-like variable regions in a protochordate. *Nat. Immunol.* **3**, 1200-1207 (2002).
  20. M. Kasahara, M. Vazquez, K. Sato, E. C. McKinney, M. F. Flajnik, Evolution of the major histocompatibility complex: isolation of class II A cDNA clones from the cartilaginous fish. *Proc. Natl. Acad. Sci. USA* **89**, 6688-6692 (1992).
  21. S. Bartl, I. L. Weissman, Isolation and characterization of major histocompatibility complex class IIB genes from the nurse shark. *Proc. Natl. Acad. Sci. USA* **91**, 262-266 (1994).
  22. A. F. Williams, A. N. Barclay, The immunoglobulin superfamily-domains for cell surface recognition. *Annu. Rev. Immunol.* **6**, 381-405 (1988).
  23. K. Hashimoto, T. Nakanishi, Y. Kurosawa, Identification of a shark sequence resembling the major histocompatibility complex class I  $\alpha 3$  domain. *Proc. Natl. Acad. Sci. USA*. **89**, 2209-2212 (1992).

24. P. Cosson, J. S. Bonifacino, Role of transmembrane domain interactions in the assembly of class II MHC molecules. *Science* **258**, 659-662 (1992).
25. P. J. Bjorkman et al., Structure of the human class I histocompatibility antigen, HLA-A2. *Nature* **329**, 506-512 (1987).
26. J. H. Brown et al., A hypothetical model of the foreign antigen binding site of class II histocompatibility molecules. *Nature* **332**, 845-850 (1988).
27. J. H. Brown et al., Three-dimensional structure of the human class II histocompatibility antigen HLA-DR1. *Nature* **364**, 33-39 (1993).
28. Y. Ohta et al., Primordial linkage of  $\beta_2$ -microglobulin to the MHC. *J. Immunol.* **186**, 3563-3571 (2011).
29. M. A. Saper, P. J. Bjorkman, D. C. Wiley, Refined structure of the human histocompatibility antigen HLA-A2 at 2.6 Å resolution. *J. Mol. Biol.* **219**, 277-319 (1991).
30. D. H. Fremont, M. Matsumura, E. A. Stura, P. A. Peterson, I. A. Wilson, Crystal structures of two viral peptides in complex with murine MHC class I H-2K<sup>b</sup>. *Science* **257**, 919-927 (1992).
31. V. L. Murthy, L. J. Stern, The class II MHC protein HLA-DR1 in complex with an endogenous peptide: implications for the structural basis of the specificity of peptide binding. *Curr. Biol.* **5**, 1385-1396 (1997).
32. X.-L. Li, M.-K. Teng, E. L. Reinherz, J.-H. Wang, Strict major histocompatibility complex molecule class-specific binding by co-receptors enforces MHC-restricted  $\alpha\beta$  TCR recognition during T lineage subset commitment. *Front. Immunol.* **4**, 383 (2013).
33. Y. Ohta, K. Okamura, E.C. McKinney, S. Bartl, K. Hashimoto, M. F. Flajnik, Primitive synteny of vertebrate major histocompatibility complex class I and class II genes. *Proc. Natl. Acad. Sci. USA.* **97**, 4712-4717 (2000).
34. C. T. Amemiya et al., The African coelacanth genome provides insights into tetrapod evolution. *Nature* **496**, 311-316 (2013).
35. N. R. Saha et al., Genome complexity in the coelacanth is reflected in its adaptive immune system. *J. Exp. Zool. B Mol. Dev. Evol.* **322**, 438-463 (2014).
36. C. P. Kruiswijk, T. T. Hermsen, A. H. Westphal, H. F. Savelkoul, R. J. Stet, A novel functional class I

- lineage in zebrafish (*Danio rerio*), carp (*Cyprinus carpio*), and large barbus (*Barbus intermedius*) showing an unusual conservation of the peptide binding domains. *J. Immunol.* **169**, 1936-1947 (2002).
37. A. Sato, H. Sultmann, W. E. Mayer, J. Klein, Mhc class I gene of African lungfish. *Immunogenetics* **51**, 491-495 (2000).
38. U. Grimholt, K. Tsukamoto, T. Azuma, J. Leong, B. F. Koop, J. M. Dijkstra, *BMC Evol. Biol.* **15**, 32 (2015).
39. Y. Inoue et al., Molecular cloning and preliminary expression analysis of banded dogfish (*Triakis scyllia*) CC chemokine cDNA by use of suppression subtractive hybridization. *Immunogenetics* **56**, 722-734 (2005).
40. S. F. Altschul et al., Gapped BLAST and PSI-BLAST: a new generation of protein database search programs. *Nucleic Acid Res.* **25**, 3389-3402 (1997).
41. A. Yates et al., Ensembl 2016 *Nucleic Acids Res.* **44**, D710-716 (2016).
42. J. Wyffels, B. L. King, J. Vincent, C. Chen, C. H. Wu, S. W. Polson, SkateBase, an elasmobranch genome project and collection of molecular resources for chondrichthyan fishes. *F1000Res.* **3**, 191 (2014).
43. N. W. Baddar, M. R. Woodcock, S. Khatri, D. K. Kump, S. R. Voss, Sal-Site: research resources for the Mexican axolotl. *Methods Mol. Biol.* **1290**, 321-336 (2015).
44. C. Burge, S. Karlin, Prediction of complete gene structures in human genomic DNA. *J. Mol. Biol.* **268**, 78-94 (1997).
45. V. Solovyev, P. Kosarev, I. Seledsov, D. Vorobyev, Automatic annotation of eukaryotic genes, pseudogenes and promoters. *Genome Biol.* **7**, Suppl 1: P.10.1-10.12. (2006).
46. T. N. Petersen, S. Brunak, G. von Heijne, H. Nielsen, SignalP 4.0: discriminating signal peptides from transmembrane regions. *Nat. Methods* **8**, 785-786 (2011).

47. A. Drozdetskiy, C. Cole, J. Procter, G. J. Barton, JPred4: a protein secondary structure prediction server. *Nucleic Acids Res.* **43**, W389-W394 (2015).
48. R. C. Edgar, MUSCLE: multiple sequence alignment with high accuracy and high throughput. *Nucleic Acids Res.* **32**, 1792-1797 (2004).
49. D. H. Fremont, F. Crawford, P. Marrack, W. A. Hendrickson, J. Kappler, Crystal structure of mouse H2-M. *Immunity* **9**, 385-393 (1998).
50. E. F. Pettersen et al., UCSF Chimera – a visualization system for exploratory research and analysis. *J Comput Chem.* **25**, 1605-1612 (2004).
51. K. Tamura, G. Stecher, D. Peterson, A. Filipski, S. Kumar, MEGA6: Molecular Evolutionary Genetics Analysis version 6.0. *Mol. Biol. Evol.* **30**, 2725-2729 (2013).
52. S. Whelan, N. Goldman, A general empirical model of protein evolution derived from multiple protein families using a maximum-likelihood approach. *Mol. Biol. Evol.* **18**, 691-699 (2001).
53. M. Nei, S. Kumar, *Molecular Evolution and Phylogenetics*, Oxford University Press, New York. (2000).
54. N. Saito, M. Nei, The neighbor-joining method: A new method for reconstructing phylogenetic trees. *Mol. Biol. Evol.* **4**, 406-425 (1987).
55. D. T. Jones, W. R. Taylor, J. M. Thornton, The rapid generation of mutation data matrices from protein sequences. *Computer Applications in the Biosciences* **8**, 275-282 (1992).
56. J. Felsenstein, Confidence limits on phylogenies: An approach using the bootstrap. *Evolution* **39**, 783-791 (1985).
57. B. Ortmann et al., A critical role for tapasin in the assembly and function of multimeric MHC class I-TAP complexes. *Science* **277**, 1306-1309 (1997).

58. Y. Wang, L. Y. Geer, C. Chappey, J. A. Kans, S. H. Bryant, Cn3D: sequence and structure views for Entrez. *Trends Biochem. Sci.* **25**, 300-302 (2000).
59. T. T. Wu, E. A. Kabat, An analysis of the sequences of the variable regions of Bence Jones proteins and myeloma light chains and their implications for antibody complementarity. *J. Exp. Med.* **132**, 211-250 (1970).
60. J. G. Inoue et al., Evolutionary origin and phylogeny of the modern Holocephalans (Chondrichthyes: Chimaeriformes): A mitogenomic perspective. *Mol. Biol. Evol.* **27**, 2576-2586 (2010).
61. M. Nakatani, M. Miya, K. Mabuchi, K. Saitoh, M. Nishida, Evolutionary history of Otophysi (Teleostei), a major clade of the modern freshwater fishes: Pangaeian origin and Mesozoic radiation. *BMC Evol. Biol.* **11**, 177 (2011).
62. P. Xu et al., Genome sequence and genetic diversity of the common carp, *Cyprinus carpio*. *Nature genetics* **46**, 1212-1219 (2014).
63. C. V. Henkel et al., Comparison of the exomes of common carp (*Cyprinus carpio*) and zebrafish (*Danio rerio*). *Zebrafish* **9**, 59-67 (2012).
64. I. C. Kolder et al., A full-body transcriptome and proteome resource for the European common carp. *BMC Genomics* **17**, 701 (2016).
65. J. Yang et al., The *Sinocyclocheilus* cavefish genome provides insights into cave adaptation. *BMC Biol.* **14**, 1 (2016).
66. Y. Kuang et al., The genetic map of goldfish (*Carassius auratus*) provided insights to the divergent genome evolutions in the Cyprinidae family. *Sci. Rep.* **6**, 34849 (2016).
67. P. J. van den Elsen, A. Peijnenburg, M. C. J. A. van Eggermond, S. J. P. Gobin, Shared regulatory elements in the promoters of MHC class I and class II genes. *Immunology Today* **19**, 308-312, 1998.
68. K.-Q. Gao, N. H. Shubin, Late Jurassic salamandroid from western Liaoning, China. *Proc. Natl. Acad. Sci. USA.* **109**, 5767-5772 (2012).
69. W. Chen et al., Crystal structure of a bony fish  $\beta_2$ -microglobulin. *J. Biol. Chem.* **285**, 22505-22512 (2010).

70. T. Terado et al., Molecular cloning of C4 gene and identification of the class III complement region in the shark MHC. *J. Immunol.* **171**, 2461-2466 (2003).
71. P. J. Bjorkman, P. Parham, Structure, function, and diversity of class I major histocompatibility complex molecules. *Annu. Rev. Biochem.* **59**, 253-288 (1990).
72. J. K. Pullen, R. M. Horton, Z. Cai, L. R. Pease, Structural diversity of the classical H-2 genes: *K*, *D*, and *L*. *J. Immunol.* **148**, 953-967 (1992).
73. L. M. Amzel, R. J. Poljak, Three-dimensional structure of immunoglobulins. *Ann. Rev. Biochem.* **48**, 961-997 (1979).
74. K. C. Garcia et al., An  $\alpha\beta$  T cell receptor structure at 2.5 Å and its orientation in the TCR-MHC complex. *Science* **274**, 209-219 (1996).
75. M. Koch et al., Structures of an MHC class I molecule from B21 chickens illustrate promiscuous peptide binding. *Immunity* **27**, 885-899 (2007).
76. Z. Zeng et al., Crystal structure of mouse CD1: An MHC-like fold with a large hydrophobic binding groove. *Science* **277**, 339-345 (1997).
77. D. M. Zajonc, H. Striegl, C. C. Dascher, I. A. Wilson, The crystal structure of avian CD1 reveals a smaller, more primordial antigen-binding pocket compared to mammalian CD1. *Proc. Natl. Acad. Sci. USA.* **105**, 17925-17930 (2008).
78. W. P. Burmeister, L. N. Gastinel, N. E. Simister, M. L. Blum, P. J. Bjorkman, Crystal structure at 2.2 Å resolution of the MHC-related neonatal Fc receptor. *Nature* **372**, 336-343 (1994).
79. J. M. Dijkstra, U. Grimholt, J. Leong, B. F. Koop, K. Hashimoto, Comprehensive analysis of MHC class II genes in teleost fish genomes reveals dispensability of the peptide-loading DM system in a large part of vertebrates. *BMC Evol. Biol.* **13**, 260 (2013).
80. M. Durairaj, R. Sharma, J. C. Varghese, K. P. Kane, Requirement for Q226, but not multiple charged residues, in the class I MHC CD loop/D strand for TCR-activated CD8 accessory function. *Eur. J. Immunol.* **33**, 676-684 (2003).



81. R. Wang, K. Natarajan, D. H. Margulies, Structural basis of the CD8 $\alpha\beta$ /MHC class I interaction: focused recognition orients CD8 $\beta$  to a T cell proximal position. *J. Immunol.* **183**, 2554-2564 (2009).
82. Y. Li, Y. Yin, R. A. Mariuzza, Structural and biophysical insights into the role of CD4 and CD8 in T cell activation. *Frontiers Immunol.* **4**, 206, 1-11 (2013).
83. M. F. Flajnik, T. Tlapakova, M. F. Criscitiello, V. Krylov, Y. Ohta, Evolution of the B7 family: co-evolution of B7H6 and NKp30, identification of a new B7 family member, B7H7, and of B7's historical relationship with the MHC. *Immunogenetics* **64**, 571-590 (2012).
84. D. Hatherley, S. C. Graham, K. Harlos, D. I. Stuart, A. N. Barclay, Structure of signal-regulatory protein  $\alpha$ . A link to antigen receptor evolution. *J. Biol. Chem.* **284**, 26613-26619 (2009).
85. J. Kaufman, J. Salomonsen, M. Flajnik, Evolutionary conservation of MHC class I and class II molecules – different yet the same. *Seminars in Immunology* **6**, 411-424 (1994).
86. R. F. S. Walters, W. F. DeGrado, Helix-packing motifs in membrane proteins. *Proc. Natl. Acad. Sci. USA.* **103**, 13658-13663 (2006).
87. L. –G. Lundin, D. Larhammar, F. Hallböök, Numerous groups of chromosomal regional paralogies strongly indicate two genome doublings at the root of the vertebrates. *J. Struc. Func. Genomics* **3**, 553-63 (2003).
88. M. F. Flajnik, M. Kasahara, Origin and evolution of the adaptive immune system: genetic events and selective pressures. *Nature Rev. Genet.* **11**, 47-59 (2010).
89. J. M. Dijkstra et al., A third broad lineage of major histocompatibility complex (MHC) class I in teleost fish; MHC class II linkage and processed genes. *Immunogenetics* **59**, 305-321 (2007).
90. L. A. Kelley et al., The Phyre2 web portal for protein modeling, prediction and analysis, *Nature protocols* **10**, 845-858 (2015).
91. A. Waterhouse et al., SWISS-MODEL: homology modelling of protein structures and complexes. *Nucleic Acids Res.* **46**, W296-W303 (2018).

## Representative W-category sequences in FASTA format

>banded\_houndshark\_WA\_DS5\_n1\_01

MELRNFLIIIAAVTAGTRAAIEFESVSEKLYYSYTPDSKRNIDIFSIDSIPFMVYDYGEKMFVLNGNVT  
DGIKELGQKEVTTYTERARGFSTRLQTITEEMIKLTNAKTIISKKPVVHIYTKEDYAPHHANTLYCY  
AEKFYPFEIGVTFLVNGRPFAGLVNSSLVVEDWTFNILKYIRIDPQDGDSYSCQVDHISLDKPLTV  
SMDPPSPGPRSGIIVCAVGVITGVIGLLIGLYLVTTVCSRLGKPRSRQFRKE

>banded\_houndshark\_WA\_DS5\_n2\_01

MELGNFLIIIAAVTAGTRAAIEFESISAMLYYSYTPDSKRNIDIFSIDSIPFMVYDYREKMFVLNGNVT  
DGIKELGQKEVTTYTERARGFSTRLQTITEEMIKLTNAKTIISKKPVVHIYTKEDYAPHHANTLYCY  
AEKFYPFEIGVTFLVNGRPFAGLVNSSLVVELDWTFNILKYIRIDPQDGDSYSCQVDHISLDKPLTV  
SMDPPSPGPRSGIIVCAVGVITGVIGLLIGLYLVTTVCSRLGKPRSRQFRKE

>banded\_houndshark\_WA\_DS5\_n3\_01

MELRNFLIIIAAVTAGTRAAIEFESVSAMLYYSYTPDSKRNIDIFSIDSIPFMVYDYREKMFVLNGNV  
TDGIKELGQKEVTTYTERARGFSTRLQTITEEMIKLTNAKTIISKKPVVHIYTKEDYAPHHANTLYC  
YAEKFYPFEIGVTFLVNGRPFAGLVNSSLVVELDWTFNILKYIRIDPQDGDSYSCQVDHISLDKPLT  
VSMDPPSPGPRSGIIVCAVGVITGVIGLLIGLYLVTTVCSRLGKPRSRQFRKE

>banded\_houndshark\_WA\_DS5\_n4\_01

MELRNFLIIIAAVTAGTRAAIEYKSVSERLYYSHTEDEETNGHIFTANAFPLYDKNKLFVIHGQE  
TDGIQELGQEEVTHFKERASGIQAGLQGIKEITRLTKGSSVLKEKPVVHIYTEEDYAPHHANTLYC  
YAEKFYPFEIGVTFLVNGRPFAGLVNSSLVVEDWTFNILKYIRIDPQDGDSYSCQVDHISLDKPLT  
VSMDPPSPGPRSGIIVCAVGVITGVIGLLIGLYLVTTVCSRLGKPRSRQFRKE

>banded\_houndshark\_WA\_DS10\_01

MSRESFLLLLLLSPGTGLSATDTWRVLVACYITDDPNPLEMMCEVTADSRIFIYYDTSIHLLEGGL  
YRGVLVELARDNRNRAIASLRQTMALAAIATNFSSPPNEMADLLLFPEKEVTYGEANILSCLVSGAFP  
PTITITLQVNGAPLHTDANSSRLWYGEDWRFQAVRRAHIRPEAGDMYSCVQHTVSKEVKMVYW  
EPEMPDSWEESILDSSQLGVLVGGVAVGALGMALGIGSCVWPKALSRNQSLLRIRSSLRSSSV

>banded\_houndshark\_WB\_DS1\_n1\_01

MLRSSVLLLLGLFQTAGTHITQFMLTFDNSQTPATTLAAYDGTETFIQFNYSSTNEFLATKPAAEPLV  
QSLNANERLVERYVRYGSFAPLVAEAIQAARRLIAKPSVNITTHRLHRGKDPLLLICHVNGFYPSGI  
NATWLHNGGTIQQEVLSRILPNTDGTFTTLQISVTPQSRDITYTCQVEHSSSTDKLTATWAPKVK  
WPTHGYVAGIVIGVAGIIIALAGGIGRRRGFPACGSEAMPNQRCVNPDSAAADSGVWTQGEAEQLN  
VENERNPSPAPAQD

>banded\_houndshark\_WB\_DS1\_n2\_01

KPSVNITTHRLHRGKDPLLLICHVNGFYPSGINATWLHNGGTVQQEVLSRILPNTDGTFTTLQISV  
TPQSRDITYTCQVEHSSSTDKLTATW

>banded\_houndshark\_WB\_DS3\_01

MPPARKVIPNGSILTVATFSCCFLSLISALDVVQQLLDCDQAAVTRKDISGCKWALAYNGHTLSYFD  
PRADRLIVESSTVKSEVDLSLNDPKALKNIRNEIQDTVNFLSQLLEVGAGTLDRKVPVSVTISFIDLEA  
SGHSSQLQCTVSGFYPRALNVSWLKDGRSTEQYVTQTPILPNNENTFQTTAYIKIEPSTVDITYTCLV  
EHVTFPQGHRTDWVPRHRSSLSPAIVGILFGVIGIITAVVGGVVRMKRQGHQSRMIEPKVLFQKCQ  
ERRSNRSQTSMRSNASASSATSGDGLTKHTV

>banded\_houndshark\_WB\_DS3\_02

MPPARKVIPNGSILTVATFSCCFLSLISALDVVQQLLDCDQAAVTRKDISGCKWALAYNGHTLSYFD  
PRADRLIVESSTVKSEVDSLKDPKALKNIRNEIQDTVNFLSQLLEVGAGTLDRKVPSPVTISFIDLEA  
SGHSSQLQCTVSGFYPRALNVSWLKDGSRSTEQYVTQTPILPNNENTFQTTAYIKIEPSTVDTYTCLV  
EHVTFPQGYRTDWWVPRHRSSLSPAIVGILFGVIGIITAVVGGVVRMKRQGHQSRMIEPKVLFQKQC  
ERRSNRSQSSMRSNASASSATSGDGLTKHTV

>blue\_shark\_WA\_DS10-like

MKSHPGNSLLILLTAGTGLPATDTWRVVVTCYVTDNPSPTMEMMCELTADGRVLIYYDTSIHLLLEG  
NLEEYHGLLDELARDNRNTIASLRQTMALAAVATKFSSPPNEIADLLLFPEKEVTYGKANILSCLVS  
GVFPPTITITLQVNGVPLHTDANSSRLWHGEDWRFQVVRRAHIQPEAGDMYSCQVLHTVSKEMKM  
VYWEPEMPDSWEENILDSSQLGVLVGGVALGVLMALGIGSCVWPKALNQNLSSLQMRSSLRSTS  
SA

>blue\_shark\_WA\_Nds3L\_

MDTERKKNRIAFLRTLITAWVLLPATECGESRVYGTTYSTSAEQTSVFTFATSDMTFAYYNSSSPGF  
EFLIKALYTLNASQHLVQKYRNDLTILNKDILNEMVHRIPGKRTEVPTVLLYPTENILGRRTVLNC  
FVFELFPPAAQVTFKNDQPLVTKVNSSLTFQTSWMFHLNSVPIQPVPVPGDIYTCVVKLQNGEEIQ  
VHWEAATSQTQRDAAQIAICTIGFLIGAVGMMIGLWLFYKRGNTQVDSRDQRTVIVEERQ

>blue\_shark\_WB\_DS1-like

MLRASVLLLLLLRRLFQTEGTHIIQLMITFDNSQTPATKLSAAYDGTEFIRFNYSTNQFLATQPAAESL  
VQNLNANEKLVKRYVRYASFAPLLAETVIQVAHRLIAKPSVNITTHRLHREKDPLLLVCHVNGFYF  
SGINATWLHNAGSVQEVLSRILPNTDGTFTLQISITPQSRDITYTCQVEHSSSTDKLTATWAPN  
VKSWPHTHGYVAGIVIGVAGIIIALAGGIGRYRGVWTQGEAE

>blue\_shark\_WB\_DS3-like

FRLGGGFCLTQLLSLLLCRSQVGDFFSSMPPVRNNGSILTVATFSCCFLSLISALDVVQQLLDCDEAA  
VIHKNISSCKWALAYNGQTLSYFDTRVERLIVESSTVKSQVDSLKDPKALKNIRNEIQDTVNFLSQ  
LLQVGADTLDREVSPTVTISFIDQETTE

>cloudy\_catshark\_WA\_DS5-like\_82K

MELWSFLIMISSLTAVTRAIEIGEYVESISARIYYRSAPDSTRNIYVFTINYIPFLLYDFETQKFVLNGK  
MTEGLKELGQEEVIYYKAMARGLNVRLQKYTNEMIKLTSASSTITSKSLIYKKPLVHIYTKKIYAPH  
QSNILFCYAENFYFPEIDITFLINGRPFTGLVNSSQLMIEMDWTFNILKYISIDPQDRDITYSCQVNHMS  
LDEPMTVLMDSYSQPHTGTIVCAVGVIAGALGLMVGLYLVTKLCSRQGKPCSRQFCK

>cloudy\_catshark\_WA\_DS5-like\_159K

MELWSFLIISSLTAVTRAIEIDVESISIIYQYYGYTPDSENSLSSFAINAFPFMFMHHGLKNFIINGNVTN  
GKNVLGEDEATFFREITRRFQLRLQRLTKELVKQTGTRIVHSKLLIYKKPVVHIYAEENYTPGQPNT  
LYCYAEKFHPYEIEVTFVNGRPFTGPSESSETMVAADWTFHVLKYIRIDPQEGDITYSCQVDHVS  
LDPKMFVSM

>cloudy\_catshark\_WA\_DS10-like\_159K

MSRDSFLFFLLCPGTGSSESDPWRVLVACFVTDNPSLQPLMCEVTVDDRMFIYYDSTLPSVQVLDS  
GLEEYRWILAKLVSDRERTIASLRREMAFIATISNSSPPNDFGELFLYPESEVTYGEMNVLTCVNGA  
FPPTITVTLQMNGVPIDAGVNSSRLSFGEDWRFVTRHAQIRPAAGDLYSCEVLHTISNEVKVVYW

>cloudy\_catshark\_WB\_DS1-like\_159K

MVRLLVLLVSGLLQIVDAHMIQFLFSYDRSHTPATNLSFAYDGTVEVIRFNYYTTNQFLATQPVAAPW  
VQHLNDNERLVKRYVHYGSLAPIVGDAILRVARRLSAKPSINITAHHLPEKDPDLLICRVDFYPS

GFNATWLLNGDEVEQEVLSSSVLPNRDGTGFQATLQVSITPRSGDAYTCQVEHSSSPDKLTATWAPK  
VRSWPEHGYVSGITVGVGIMIALAGGIGRWR

>cloudy\_catshark\_WB\_Nds5L\_82K

MSVLYRWVAVAAATVASVLDLVDLDCSTEPHYFHMQCACVYGDNKPANLSSEMAYDGATILYYDS  
AEKTFVAAQPIGQAEVNKRKNINIVLSRIESLCDKIKETAHISNLTIKMAPIPSKVLLQEKSGQMKL  
VCLVKDFFPRDIKISWLRDGVVIVNAPQTVNIVPQDDKTFQARSLLTLNEDVSGSYICQVEHEALAR  
KLQVPFRYDRITEHKSIIIGAVLGILGISFAVVTGILYYCNLN

>cloudy\_catshark\_WB\_Nds5L\_159K

MPVFNRRWVAVAAATIISVLDMDVCLDRDMRVYVTDSCSIYRDHKLLRVTWADAFDGASLYHYDS  
VKRKIVADQAIGQAEADKLNDSIFIQSLPSQIESLCDKMKQVAESTNTNVDKKAIPSKVLLQEKSG  
QMKLVCLVKNFFPRDIKMSWLRDGVVIVNAPQTVNIVPQRNRTFQARSLLSLNGDVNGSYSCQVE  
HETLTKLVKLF

>great\_white\_shark\_WA\_DS5-like

MELCSSLIIIASLTTVTWAEIEVESVSARLYYSYTPDSKRNVDIFNINSIPFLFYDYGAQMFVLNGNVT  
DGIKELGQEEVTTYTERARGFNTRLQTITEEIIKLTNAKSIHKKPVVHIYTKENYTPRESNTLFCYAE  
KFYPFEIDITLLINGKSFTGPVNSSQLMVETDWTFNILKYIRIDPQDGDYSCQVDHMSLDKPLTVLL  
DQPPAQPHSGTIVCAVGVIAGVLGGLIGLYLVTKIHNROGKPCSRPFCKE

>great\_white\_shark\_WA\_DS10-like

MSRDFFLFFLLCPCPGTGNSGLDRWKVSVACFVTDNPSLLEMACELTNDRILLYDSTTPSVQFL  
VSGFEDYRGIFEELVQDRDRALISLRRTMALTAAVTNHSSPPNEIAQLFLYPEKDVVYGQESILICLV  
SGLFPPTIDITLQKNGAPLDAHVNSSKLSFGEDWRFQVLHYAQRPEAGDYSCKALHTISREEKIV  
YWEPELNPSEESALDSSQFAVLVLGLIVGLLGTATGICFCLWPILVNRNRLRSRMNSSVRSSSSA

>great\_white\_shark\_WA\_Nds3L

MGCPRQNNKVVFFCALPLAWLLGSAIECAEQVRGMIFSVDSDRTSIVTSTTDDMTLAYHNSTESN  
VVFLIEALNALHAESNNLIQKYQSYLTFNEILLNEMANRIPEKQNDPTVLLYPGEPFTLGGKNTLN  
CFVSHLFPVVAHVSFLKNDQPLSGQVRSSQFTFDNSWMFQILKYVQIEPAVGDKYSCVVELVTKEQ  
FRAYWEATTSGNHKNPVQIAICAVGFVIGGLGMMTGLCLIFYKWGNE  
VGSRDQQTIPAEEPQDSMLNGEGAQDEGTRVDRSDPNQPAEC

>great\_white\_shark\_WB\_DS1-like

MIGVFLVSVLQTLGAHMLQAQFSIEKSHHAAVSLRFAFDGTEVIQFNYYTTNQFMATEPLAKSF  
AEQLNSDQKKVRRYIRYGSFANLVSDVVLRAAHQLITKPSVNITAHRLHSGKDPLHLICNVNGFYP  
RGINATWLCNGDAFEQEVLRSRILPNTDGTGFQVLFQISIAPRSSDYTCQVEHSSSPDKLTAIWAPKM  
KSWPTYGYVTGIVFMIFGIIALAGGISRWGLHACGSQPEPNQSQVNTHSDAYSSNTDLGVWTQGE  
ANHLYVESERTPSPIP

>great\_white\_shark\_WB\_DS3-like

MPPLRNVIPHMAISAAALYFWCCVSLISALGVVQEVLDCDRAAVSQKDVTGCFIVAYNKNILTRF  
DTKAGRLTVENLTVKNEVDSLNDPRALKIIQDGIQDTVNFLSLLLEAGADTLDREVSPSVTISFHD  
LEDFDHSSQLQCTVAGFYPSALNVTWLKNDGNIDEQVVQTQILPNSEKAFQTAFTNIDPKTEDTY  
TCFVEHVTFPDGLRTNWVPQPKSSLSAAAIVGILFGIGGILTAITGAVFRMKRQGYQPRIPGLKVLV  
WKNQQQKSNRSQASMHSNTSASSATSGDGLTKDTV

>great\_white\_shark\_WB\_Nds5L

MPVFYRWIFVAVTAAVVSILDEVDGSSDLHIFHVQCECIYHDNKPANFSWQDGYDGITILYYDFTN  
KTFVAVQSIAQTEVDRRNSNTDYVASVPRRIHSFCNKIKQTAITSNLMEKMAPTSSRVFLQEKAGQ

RDLVCLVKNFFPRNIKVSWLRNGVAIVNGQETTNIAPQDDSTFQARSILTLNEGVGGSYFCQVEHEA  
LTRKLLVPLEHDRITKNEALIIVGAVLGLIGISFAVMTGILYCTLYRADQFNVHLTAKFTNRAGPCQ  
MNPCNSSMRSSSNTSNTSNTSCYDDLTKSRA

>whale\_shark\_WA\_DS5-like

VSAVTESVYYVHTAHSENILDIFSINYVPFLFYNYGAQTFVINGQVTDGIRELGQEEVDYYHERARG  
FQARLRGTTREMIHLTNFTAITKKKPSVHIYMEQNGGPGHSDILYCYAEKFYPPFGIELNFLVNGRPF  
RGQVNSSQLVVEPDWTFNILKYIRMERGSQDQTYTCRVDHISLQQPLTVSL

>whale\_shark\_WA\_DS10-like

RWNMQFGCFAADDPRFPELVCELQVEGRPFIIYDSSLPDIQFLAPGFEDYRAILTEFTQDRDRTVAS  
LRRALAIAAVVTNHSNSPNEVGEIFLYPERLVEWGQPNVLVCLVTGLFPPSVAVSLHLDGAPLGSD  
VNSSRIFFGEGWRFQALWYAHIRPGPGHLYSCVVRHNISREKVVFW

>whale\_shark\_WB\_DS1-like

KPSVNIRTHRMTGSSEPLLLSCHVNGFYPRDINISWLLNGAALEQADTSTLLPNADGTFQLMCHIGI  
VPRNGDQTYTCQVEHSSSSDKLTADW

>whale\_shark\_WB\_DS3-like

ALQQLLDCDHEAVAREDLSGCTLSVAYNRQTLTHYDARARHFSVEDSTVKNEVDNLNKDPKFLEN  
IDKILQTTLLHQLLESADPVLDRK

>zebra\_bullhead\_shark\_WA\_DS5-like

MELCGFLIIIASLTTVTRAAIEFESVSARLYYSNTLDLERNIDIFNINSIPFLFYDYGALMFVLNGKMT  
DGVEELGQEEVTYFKERARGFQARLQIITEEMIKLTNAKRIISKKPAVHIYTKENYTPHQSNLYCY  
AEKFYPFIDITFLINGRRFTGLVNSSQTVVEQDWTFNILKYIRIDPHDGDQTYSCVAHMSLEKPLTV  
LLDQPPALPYTGTIVCAVGVIAGILGLVITLYLVTKIYKRRGKLCSDQLCKQ

>zebra\_bullhead\_shark\_WA\_DS10-like

SKLFPSLLLPSKLFPSLLLPSNLFPSLLLPSNLFPSLLLPSNPFPSLLLPSKLFPFLLPSKLFPSILLLSIL  
LLLPISPMSALEKGVQLACFVTDPSLMDLACELKTEDRIFIYDQTTLSVQFQVSGFEQYRGILAE  
LVQQSSRTIASQRRMMDITIALTNNSPPPNEIAEVFLYPEKAVAFGETNVLTCLVNGLFPPITINITLQK  
NEEPLDGDVNSSKLSFGDDWRFQVLRQAQIQPAAGDLYSCKVVHTISNEEMITYWEPGILDPSEETT  
DSDSSQLACFIC

>zebra\_bullhead\_shark\_WB\_DS1-like

MSGGAENRLNIRGFILLSWGLTDTLGIHLIQLLFSCDGPHPVSSLRFAYDGEDYIKFNYTTDKFVAA  
NPLAQPFVNSFNSDAKMVRKYVRYGYGPLVAEAVLQVAKTLTAKPSIAITAHRLSGGNHLLLN  
CRIGGFYPRAINTTWLQDGGTVEQEVLKSRILPNKDGTQVTLQISIDPGRGDSYTCQVEHRSAPK  
LTAVVWPKRKNVLLTHGKVIGLILMVVGVIIAAIGAFIAWKGRHASGSQPGPNQGQANAHLDAYG  
CNTNSGVCQAHLCEEIERSPSPTPAENEPSNSEGPPIFGDQVASVYVLAGLAESDSCRCPASRVEP  
LAL

>zebra\_bullhead\_shark\_WB\_Nds5L\_1

MSVFYSWVFAVSVLDVVDSSSDLHLFHVQCECIYRDNKLADLSWQDAYDGATVMYYDTADKT  
FVAVQPIARAEDRRNSNTDYTESVPRLEGLCDKIKQTAVTSNFTLEKMAPTFTRAFIEKKGSRSNL  
VCLVKSFFPSDIKVSWARNGVTVNGSEITNILPQRDGTQARSILTLSGDVDASYSQVEHETIRGKL  
IVLLERNRIAENEALIIVGAVLGLIGISAAVVTGILYCCILNRGNQISVHPTAKFTNRARPCGVNPCNA  
SVRSSTSNSSNSSSSSSADGLTKSHA

>zebra\_bullhead\_shark\_WB\_Nds5L\_2

MSVFYRWVAVSVLVDVVDSSSDIHLFHVQCECVYDDGGLANIFLQYAYDGATIMFYDMGTRRY  
VAVQPFAQAEVDRNSQLDYVVSVPRIESVCDEINQTAISSNLNLDGKAPTFRATRAFIEKKGSRSNL  
VCLVKSFPSDIKVSWARNGVTVNGSEITNILPQRDGTGFQARSILTLSGDVVDASYSCQVEHETIRGKL  
IVLLERNRIAENEALIIVGAVLGLGISAAVVTGILYCCILNRGNQISVHPTAKFTNRARPCGVNPCNA  
SVRSSTSNSSSSSSSSADGLTKSHA

>zebra\_bullhead\_shark\_WB\_Nds5L\_3

MSVFYRWVAVAVTAASVLDVVESSSELRLYQTRCGCVYRDQKFLNVFWEDAFDGTTFIFYDA  
EKKQLVSAQPIIQAEVNRNRPDPNYIESVPPFIENLCEKTKQAAVASNTTLEKIAPTFTRAFIEKKAGR  
SNLVCLVKFFPSDIKVSWARNGVTVNGSEITNILPQRDGTGFQARSILTLSGDVVDASYSCQVEHETIR  
GKLIVLLERNRIAENEALIIVGAVLGLGISAAVVTGILYCCILNRGNQISVHPTAKFTNRARPCGVNP  
CNASVRSSTSNSSSSSSSSADGLTKSHA

>spiny\_dogfish\_WA\_DS5-like

EFKTISERLYYSYSSDSETNGHIFDINASPFLFYDYKMHTFVIHGNVTNGIEELGQEEVTHFKERASGI  
QAWQQGITKEMTKLTNGTSLVLRKPSVHIYTQESYTPRPSNTLYCYAEKFYPFEIDINFLINGRRFTG  
PVHSSQLVVEADWTFNILKYIRIDPQDGTYSQAAHISLTKPLTVLLDQPPLMPYSGTIVCAVGVV  
AGVIGLAITLYLMTKIYSRRGKFKCTGQFCKQ

>spiny\_dogfish\_WA\_DS10-like

MHDMIALTSNSQPPNEIGEFLYSEKPVVFGQTNVLTWCWVTGLFPPAVNATLYRNGEALASEVNSS  
RLSFGEDWRFQTLRYAEIQPAAGDIYSCKVVHGTGKEEMVTYWELDAQ

>spiny\_dogfish\_WB\_DS1-like-1

MVVASRARALLWIAGLGLGLLCSEARALHTGQLMFSCDGPQPSELILRFAYDGEELARFNYTTKKF  
VATIPLVAPFINQLNSNPDKIKFFDRYSHYAPFLAETILQATQTLTAKPSITITSQRLNGGKNPLLLNC  
RVDGFYPRDINTTWLRNGDAVQQEVLKSRIFPNTDGTGFQTLTQVTVDPGRGDSYTCQLEHRSAPDK  
LTAVWAPKRKNLAAAYGYVVGIIIGIAGIVIAVSGGI

>spiny\_dogfish\_WB\_DS1-like-2

MDLASRARALLWIAGLGLGLLCSEARALHTGQLMFSCDGPQPSELILRFAYDGEELARFNYTTKKF  
VATIPLVAPFINQLNSNPDKIKNTDRYSHYAPFLAETILQATQTLTAKPSITITSQRLNGGKNPLLLNC  
RVDGFYPRDINTTWLRNGDAVQQEVLKSRIFPNTDGTGFQTLTQVTVDPGRGDSYTCQLEHRSAPDK  
LTAVWAPKRKT

>spiny\_dogfish\_WB\_DS1-like-3

MEVASRARALLWIAGLGLGLLCSEARALHTGQLMFSCDGPQPSELILRFAYDGEELARFNYTTKKF  
VATIPLVAPFINQLNSNPDKIKNTDRYSHYAPFLAETILQATQTLTAKPSITITSQRLNGGKNPLLLNC  
RVDGFYPRDINTTWLRNGDAVQQEVLKSRIFPNTDGTGFQTLTQVTVDPGRGDSYTCQLEHRSAPDK  
LTAVWAPKRKNLAAAYGYVVGIIIGIAGIVIAVSGGIIRWKVRYASGSQPGPNQSQANAHSDACVSD  
TNSGVWSQDEAEQLCAEIGQSPSPAPADVTFPYNDHIIHNTHQYLETG

>spiny\_dogfish\_WB\_DS3-like-1

MLLLCNIIHKSPILLAFCFYIGPSRISALDVVQQLLDCDLAAVLRKDVSGCLWSVAYNAKTLTRFE  
TRTGRLELGNPVVKSEVNSLNKDKKALQNIQNEMQETVDFLSRLHAGTATLDXQVPPSVTIDFHD  
LEVHGHPSQLQCTLTGFY

>spiny\_dogfish\_WB\_DS3-like-2

MLLLCNFIHKSPILLAFCFYIGPSRISALDVVQQLLDCDLAAVLRKDVSGCLWSVAYNAKMLTRF  
ETRTGRLEVGNPVVKSEVNSLNKDKKALQNIQNEMQETVDFLSRLHAGTATLDXQVPPSVTIDFH  
DLEVHGHPSQLQCTL

>spiny\_dogfish\_WB\_DS3-like-3

MLLLCNIIHKSPILLAAFCFYIGPSRISALDVVQQLDCDLAAVLRKDVSGCLWSVAYNAKTLTRFE  
TRTGRLELGNPVVKSEVNSLNKDKKALQNIQNEMQETVDFLSRLLHAGNATLDRKVPSPVTIDFHD  
P

>little\_skate\_WA\_DS5-like

MGLRGLLTALLSLAAVAEIEIETVSEHFVYGRSTSGLEKTLDILSVNSVPFLAYDHEARAFSINGQA  
TDGREELGEEEVTYFVQRAEGFQNQIRSDMSELAAGNDNQPIGSKKPIAHYTEEDYVLQRANTLY  
CFAERFYPFIEIQFLVNGQPFTGPVHSSPLLVERDWTFNILKYIRIEPQRGDTFSCLVAHVSLDKAL  
TSL

>little\_skate\_WA\_DS10-like

KTTLALTFFATDDPSLPDGVLEAKADGRSLGYYDTTLSKAQFHLSNLESLQPLVEELIERNIDSTLGL  
VHSLLTQVMALTNNSLPSNEIGEALLYSEKPDVLGEENTLICFVSGFFPPAIEVALQKNGKPIVGEVN  
SSHLSFSEDWRFYTLQYTHIQPTEGDIYSCKVFHNISKEERVTYWEPEVQEGKEAELDMSQLIVLICG  
VIIGILGAAMGFSLCFWLRFRQDSWNIRINPFVGVSHSS

>little\_skate\_WB\_DS1-like

AGEDSSLAVLQFAFDGEEFIRFEYSSNTFVAKHPLAEPYAIELNKNERNVIRNVVRYIRRWPMISHIVK  
GAIRAETAKPAITITSRPNAQGHPLVLTCTVDGFYPMDINTTWRNGKIDIDQEVLRSNILPNFDGTF  
QMRLQLSVDPSGIGDTYSCHITHTSVPDNLTA

>Japanese\_grenadier\_anchovy\_WA\_01

MGRPSPLNVCFSVFLFLQRTTAWKDYEVVVSILSYTRYTSRDPMEQGVVVLVNEAVFAYFNSTQKTF  
QLRPSASAGFSVLEASKRMDCVSEVTKAFPRQEDYLERLIEQTNGAKPPKVSPSVNVYSHFPAMPG  
TPNYLYCYATGFYPGDIEISFLLNGRPFPGPTETSDLVYGEDWTFKVFKYIRILPHPAEEYACLVNHS  
SFAQPKTTVWRLQVSKTTGASYLWTGLVAAAFGATLGCFLSVFMCKRINRRK

>Japanese\_grenadier\_anchovy\_WB\_01

MIPFLCLIFLGLSSTHGKDEFTYQQHIGCTFNRHGHVGRFWRYGFNTKDIMHVDLENEAVVSTSDE  
GNFMADERKSKLYFKRKEARLNMICSAVQTVFWQSNNLSRAAKPTVRVSMQEVQEGQEYLACSV  
QGFYPIAISVHWVYRGKIVHFGNTKTGLLPHKDGTFQMTSYLPLGNKTLQDIVCETEHISIEGKLQA  
TFEDESSNLGYIVGIALVSFLLSCLAPLGITALILFMRKRGPQSSVNESLDQSSDGDIAATVTLMALT  
GENVQAEPNPEV

>Atlantic\_herring\_WA\_01

MGKILALNVLFVLLLSQNMMAWTDYEAVSIIAYTRLTSRDSVEQGVVLVNEAVFAYFNSTQKTF  
LLRPSATAGFSVLEASERMYCVSEVTNAFPRQKDYLDRLIKQTNRAKPPKLSPSVNVYSHVPAMEA  
SPNYLYCYATGFYPGDIEISFLLNGRPFPGPTESDLVYQGQDWTFRVFKYISILPHPGEEYAFLVNHS  
SIAQPKITYWRPEVSKTTGASVLLTAVVAVVAVATGGTLGCFISLLIWRRLIVQAK

>Atlantic\_herring\_WB\_01

MIIQFCAILLGLSSLYARDEFTYQQYIGCAFNFQGPIGHFWRYGYNSKDIMHVDLGKEAVVSTSDEG  
SFMAKERQGKDYFIGKEIRLKKICSAVQTVFSQSNNLSRAAKPTVRVSLREMEGQEYLVCVAVQGF  
YPNTIRVRWVYGGQIVYFGTTTTGLLPHRDGTFQMTSYLTLGNKTRQDIVCETEHISIEGKLQATLE  
DEYSNLGFLVGIAFMSFLMACLIPLGVTAIIVCMKKNRTQGSVNDLSLRSSDCDIPATVSLMNLEGA  
QSPVQ

>sardine\_WA\_01

MGSSIVALYLLVSLQFSQNMAWTDYEAVNILAYTRLTSRDSMEQGVLVLVNEAVFAYFNATEKS  
FLLRPTAMAGFSVLEAKERMVYCVSEVIKAFPRQDYLDKLIKQTNVAKPPKLSPSVNVYSHSPAMP  
GSPNYLYCYATGFYPGDIEISFSLNGHPFPGPAESSDLVYGEDWTFRVFKYISILPLPGEVYECFVNH  
SSLAQPKRNVWQPEVSKTIGASVWLTAVVAAACGGTLGCFMSVFWWRWRNVTKFLIYFCSIWTNK  
APFNLQKRHF

>allis\_shad\_WA\_01

MGSILALHLLVLLQFSQNMAWTDYEAVSILAYTRLTSRDSVEQGVLVLVNEAVFAYFNATEKTFL  
LRPTAMAGFSVLEAKERMVYCVSEVINAFPRQDYLDKLIKQTNVAKPPKLSPSVNVYSHFPAMPGS  
PNYLYCYATGFYPGDIEISFVNLNGRPFPGPTESSDLVYGEDWTFRVFKYISILPLPGEVYECFVNHSSL  
AQPKITVWRPEVSKTIGASVWLTAVVAAACGGALGCFMSVFWWRQRNVTK

>allis\_shad\_WB\_01

MIQLCAILLGLSSLNARDEFTYQQYIGCAFNRQGPVGRFWRYGFNTKDIMQVDLKNEAVVAVSDE  
GNFMAEERQSKVYFKDKEYKLMRISAVNTVFLQSNNSLSKDAKPTVRVSLEESEGKEYIMCSVQ  
GFSPNTISVRWVYKKGKIVHFARTTTGLLPRKDGTFQITSYLTGKNTLQDIVCETEHISIEGTLQATL  
DDKYSMGILVGVGILSFFLACLTPVGVTAFIGCMKRRPQSSSLNDSLEQSSDNSVNPASVSLMDIEPQ  
ADQDPVA

>alewife\_WB\_01

MIQLCAILLGLSSLNARDEFTYQQYIGCAFNRQGPVGRFWRYGFNTKDIMQVDLKNEAVVAVSDE  
GNFMAEERQSKVYFKDKEYKLMRISAVNTVFLQSNNSLSKDAKPTVRVSLEELEGKEYIMCSVQ  
GFSPNTISVRWVYKKGKIVHFARTTTGLLPRKDGTFQITSYLTGKNTLQDIVCETEHISIEGTLQATL  
DDKYSMGILVGVGILSFFLACLTPVGVTAFIGCMKRRPQSSSLNDSLEQSSDNSVNPASVSLMDIEPQ  
AEQDPVA

>Hilsa\_shad\_WA\_01

MGRILALNVLVSALLFPQNMAWKDYETASILVYTRLTNKDSVEQGVLVLVNDVAVFAYFNSSQETF  
LLRPSGMSFSVLGYEDSKYCLLQVTDLSLPRQDYLDKLLISQANGAKPAKLSPSVTVYSQMSGSLRY  
LYCYATGFYPGDIEISFLLNGHPFPGPRESSDLMYGEDWTFRVFKYIYIHPHPGAVYSCMVNHSSLV  
QPKITIWRPEVWKTGAAMWWIPAVAAGVGAALGCLISVCVWRKEGRAWTP

>Hilsa\_shad\_WB\_01

MIIRLCAILLGLSSLYARDEFTYQQYIGCASNRQGPVKRFWRYGFNAKDIIIDVDFKTETVAVSDEG  
NFMAEERQSKVYFKHKELKLARISAVEAVFLKSNNSLSRTAKPSVRVSLEELDGEKEYLACSVQGF  
SPNTISVRWVYRGNIVYFAGTTTGLLPHKDGTFQMISYLSPENRTLQDIVCETEHISFEGKLQVTLEH  
KNSTGFLVALSILSFLLPFLTPVVVTALLSRKRKRTHSSVNDLSLEQSSDNNVHPASVGLMDLESEPE

>oriental\_weatherfish\_WA

PRQEKYVKKLKEETGSKPRFARPSIQVYTEFPEEKGKANTFYCYATHFYPGDIEMNLFVNGQIMKG  
ETSDLTYGKDWTFRVYKYVTITPEPGDEYICEVKHSSMAEPKVIMWRPDDFEYVSHPHYWAYALSLG  
ILLGITVCV

>oriental\_weatherfish\_WB

AKPTVFLSSGGNKQEYLYKCVVHGFYPNVIRVRWSWTQTGRHIYYGVSTTGILPHRDGKFQITSFLS  
LANISDHSVTCEIEHLSISGKLSIPYEKKEFTEHLPLAVTCFLLGFALFTCIPLLIRCIWQHTRKQPIDER  
NDTSADSETSINLMNVSQET

>spined\_loach\_WA



TPSASAGFSVLEKRDSTFCLTEVIKGFPRQEKYVKKLKEETRSNPRLARPSIQVYTEFPEEMGKANTF  
YCYATHFYPGDIEMNLFVNGQIVKGETSDLTYGKDWTFRVYTYVAITPEPGDEYMCEVKHSSIAEP  
KVTMWRPDFSESVSHPYWAYALPGILLGITVSVLILRKWHSQL

>white\_sucker\_WA\_01

MADILTVRAFLVLLFPQTITMWTDYHTVNVLAYTRMTGNGSMDQAVVVLVNETVFAYFDQAK  
NTFVLRPSATAGFSVLETRDSKFCLWEVLKGFTRQVEYLKFKFREEARSSKPLLARPSVNMVYTFPE  
EQGKTNMLYCYATEFYPGDIEMNFFLNGVMVKGETSDLMYKKDWTFRVYKYMNITPTPGDEYIC  
EVKHSSMTEPKLTVWRPELSESHPYWAYTLPVGVLLGTIVSILIFRKRTRNTQS

>white\_sucker\_WB\_01

FLLGVALLDIVLGAEHAYQQFIECAFNSEAQDEQLWSYGYDGDIMHVDLEKEAVVATSEHGQR  
LAEARKSKEYIKRKEEKLQKVC SAVKTVFFASNNSLSKAAKPAVYVSSGGEKKQEYLKCVVHGFY  
PNTIRVQWTHNGRSIFYGVSTTGILPLIDGTFQMTSFLSLDKVNAHDVTCEIEHSSINGKLRKTYEEK  
SSLSQITETFLAVLTFLLGFVLPV

>common\_carp\_WA\_A1

MEVIQAFILILLSPQITMWTDYQTANILVYTRMMESGSIDQAVVVLVNEATFAYFDQAKKTFVLRP  
SASAGFSVLEGSQSFVYEV LQGFYRQTGNLEKLKQETNSSKALLERPSVNVYTEFPEEQGKVV  
LYCYATGFYPGDIEINFYLNQKSTVKAETS DLMYGEDWTFKVYKYMNITPQYGDVYTCEVRHSS  
LAEPKMTEWRPEFSASTSHLYWAYVLPVPLGILLGIMVSVLILRRKQRSQI

>common\_carp\_WA\_A2\_01

MEIIQTFVILLSPQITMWTDYQTVNVLAYTRMMENGSIDQAVVVLVNEATFAYFDQAKNTFVLR  
PSASAGFSVLEGS DRFCMYEVL AGFYRQTDYLEKLKQETNSSKSLSVRPSVNVYTEFPEEQGKVN  
VLYCYATGFYPGDIEINFYLNQKSTVKAETS DLMYGEDWTFRVYKYMNITPQYGDKYTCEVRHS  
SMVQPKMTEWRPEISVSTSHLYWAYSLSLSILLGIMVSVLILRRKCRSQL

>common\_carp\_WB\_B1\_01

MQVFLFVVAFFTVLEAEHAYQQFIGCAFNNEGQVSRFWRYGYDGRDIMHVDLAKEAVVATSEP  
GQLLAEERKSKEYIKRKEARLVKVC SAVKTVFLKSNNSLSRAAKPAVYVSSGGEKDQEYIKCAVR  
GFYPNIIKVRWTHKARPIYFGVSTTGVLPHKDGTFQMTSYLSLSNVSSSDVTCEIEHLSIDGKMRINY  
GDKLLFLSQITEHVLKAVAAFL LGFVLPVCITVLFICIRQNTSKPPEDEIKDTSDESEASLSLNLNMNIS  
QET

>common\_carp\_WB\_B2

MQVFLIMAFNLNTILGAEHAYQQFIGCAFNNEGQVSRFWRYGYDGRDIMHVDLTKEAVVATSEP  
GQLLAEERKSKEYIKRKEARLVKVC SAVKTVFLKSNNSLSRAAKPAVYVSSGGEKQGEYLKCAVH  
GFYPNIIIRVRWTQNRKPVYFGVSTTGVLPHKDGTFQMISYLSLSNVSVQGVTCIEIEHLSIDGILRIAY  
EEKSLLSQITDVLKVVAAFL LGFALPVCLTVLFMCIGLRQQTTPPEDVIKDTSDSESEASLSLNLNMN  
ISQET

>Chinese\_cavfish\_Sg\_WA\_A1\_01

MANMEIIQTFILILLSPQIIMWTDYQTANILAYTRTMENGSIDQALVVLVNEATFAYFDQAKNTFV  
LRPSASAGFSVLESDRSFCMNEVL AGFYRQTNYLEKLKQETNSSKALLVRPSVNMVYTEFPEEQGK  
VNVLYCYATGFYPGDIEINFYLNQKSTVKAETS DLMYGEDWTFKVYKYMNITPQYGN EYTCEVR  
HSSLAEPKMTEWRPEFSASTSHLYWAYALPLGILLGIMVSVLVLRRQHCSQL

>Chinese\_cavfish\_Sr\_WA\_A1\_01

MANMEIIQTFLLILLSPQIIMWTDYQTANILAYTRTMENGSIDQALVVLVNEATFAYFDQAKNTFV  
LRPSASAGFSVLESDRSFCMNEVL AGFYRQTNYLEKLKQETNSSKALLVRPSVNVYTEFPEEQGK

VNVLYCYATGFYPGDIEINFYLNQKSTMKAETSDLMYGEDWTFKVYKYMNITPQYGDEYTCEVR  
HSSLAEPKMTEWRPEFSASTSHLYWAYALPLGILLGIMVSVLILRRQQRSQL

>Chinese\_cavfish\_Sa\_WA\_A1\_01

MTNMEIIQTIFILILLSPQIIMWTDYQTANILAYTRTMENGSIDQALVVLVNEATFAYFDQAKNTFVL  
RPSASAGFSVLESDRSFCMNEVLGAFYRQTNYLEKQETNSSKALLVRPSVNVYTEFPEEQGKV  
NVLYCYATGFYPGDIEINFYLNQKSTVKAETSDLMYGEDWTFKVYKYMNITPQYGDEYTCEVRH  
SSLAEPKMTEWRPEFSASTSHLYWAYALPLGILLGIMVSVLILRRQQRSQL

>Chinese\_cavfish\_Sr\_WA\_A2\_01

MEIIQTLVLILLSPQITMWTDYQTVNVLAYTRMMENGSIDQAVVVLVNEATFAYFDQAKNTFVLR  
PSASAGFSVLEGSDRSFCMYEVLGAFYRQTDYLEKQETNSAKSLLVRPSVNVYTEFPEEQGKVN  
VLYCYATGFYPGDIEVNFYLNQKSTVKAETSDLMYGEDWTFRVYKYMNITPQYGDKYTCEVRH  
SSMVEPKMTEWRPEFSVSTSHLYWAYSPLSILLGIMVSVLILRRKCRSQL

>Chinese\_cavfish\_Sg\_WB\_B1\_01

MQVFLFVMAFFNTILAAEEHAYQQFIGCAFNNQVSRFWRYGYDGRDIMHVDLVKEAVVATSES  
GQLLAEERKSKEYIKRKEARLVKVC SAVKTVFLKSNNLSRAAKPAVYVSSGGEKDQYIKCDVRG  
FYPNIIKVRWTQKARPIYFGVSTTGILPHKDGTFQMTSYLSLSNVSGHDVTCEIEHLSIDGKMRTY  
EKSLFLSQITEHVLTAMIAFLLGFVLPACLTVLFIFIWQKTSKPPPEDEIKDTSDESEASLSLNLMTSQ  
ET

>Chinese\_cavfish\_Sr\_WB\_B1\_01

MQVFLFVMAFFNTILAAEEHAYQQFIGCAFNNQVSRFWRYGYDGRDIMHVDLVKEAVVATSES  
GQLLAEERKSKEYIKRKEARLVKVC SAVKTVFLKSNNLSRAAKPALYVSSGGEKDQYIKCVVRG  
FYPNIIKVRWTQKARPIYFGVSTTGILPHKDGTFQMTSYLSLSNVSGHDVTCEIEHLSIDGKMRTY  
EKSLFLSQITEHVLTAMIAFLLGFVLPACLTVLFIFIWQKTSKPPPEDEIKDTSNESEASLSLNLMTSQ  
ET

>Chinese\_cavfish\_Sa\_WB\_B1\_01

MQVFLFVMAFFNTVLAEEHAYQQFIGCAFNSEGQVSRFWRYGYDGRDIMHVDLVKEAVVATSK  
SGQLLAEERKSKEYIKRKEARLVKVC SAVKTVFLKSNNLSRAAKPALYVSSGGEKDQYIKCVMR  
GFYPNIIKVRWTQKARPIYFGVSTTGILPHKDGTFQMTSYLSLSNVSGHDVTCEIEHLSIDGKMRTY  
GEKSLFLSQITEHVLTAMIAFLLGFVLPACLNVLFIFIWQKTSKPPPEDEIKDTSDESEASLSLNLNTS  
QET

>Chinese\_cavfish\_Sg\_WB\_B2\_01

MYVFLLLIVAFNLTTVGAEEHAYQQFIGCAFNNQVSRFWRYGYDGRDIMHVDLAKEAVVATSEP  
GQLLAEERKSKEYIKRKEARLVKVC SAVKTVFLKSNNLSRAAKPAVYVSSGGEKDQYILKCAVH  
GFYPNIIRVRWTQNRPRVYFGVSTTGVLPHKDGTFQMISYLSLSNVSAQSVTCEIEHLSIDGILRIAYE  
EKSLLLSQITEIVLKAVAAFLGFALPVCLTVLFICIRQQTTPPEDEIKDTSDESEASLALNLMNISQE  
T

>Chinese\_cavfish\_Sr\_WB\_B2\_01

MHVFLLLIMAFFNTTLGAEEHAYQQFIGCAFNNQVSRFWRYGYDGRDIMHVDLAKEAVVATSEP  
GQLLAEERKSKEYIKRKEARLVKVC SAVKTVFLKSNNLSRAAKPAVYVSSGGEKDQYILKCAVH  
GFYPNIIRVRWTQNRPRVYFGVSTTGVLPHKDGTFQMISYLSLSNVSAQSVTCEIEHLSIDGILRIAYE  
EKSLLLSQITEIVLKAVAAFLGFALPVCLTVLFICIRQQTTPPEDEIKDTSDESEASLALNLMNISQE  
T

>Chinese\_cavfish\_Sa\_WB\_B2\_01

MHVFLIMAFFNTTLGAEHAYQQFIGCAFNNNEGQVSRFWRYGYDGRDIMHVDLAKEAVVATSEPG  
QLLAEERKSKEYIKRKEARLVKVCSAVKTVFLKSNNLSRAAKPAVYVSSGGEKDQEYLKCAVHG  
FYPNIIRVRWTQNRFPVYFGVSTTGVLPHKDGTFQMISYLSLSNVSAQSVTCEIEHLSIDGILRIAYEE  
KSLLSQITEIVLKAVAAFLLGAFALPVCLTVLFLCIRQQTTKPPPEDEIKNTSDESEASLALNLMNISQ  
T

>goldfish\_WA\_01

MANMEIQTIFILILLPPQITMWTEYQTVNVLAYTRMMENGTIDQAVVVLVNEATFAYFDQPKNTF  
VLRPSASAGFSVLENGDQSFCEMNEVLGGFYRQTDYLEKLEKQETNSSKALLERPSVNVYTKFTEEQG  
KVVNLYCYATGFYPGDIEINFYLSQKSTVKAETS DLMYGEDWTFKVYKYMNITPQYGDVYTCEV  
RHSSLAEPKMTWRPEFAASTSHPYWAYALLGILLGIMVSVLILRREQHSQL

>goldfish\_WB\_01

MLVFLFVVAFFNTILAAEEHAYQQFIGCAFNNNEGQVSRFWRYGYDGRDIMHVDLAKEAVVATSEP  
GQLLADERKSKEYINRKEARLVKVCSAVKTVFLKSNNLSRAAKPAVYVSSGGEKDQQYLKCAVR  
GFYPNVIKVRWTQKGPYFGVSTTGILPHKDGTFQMISYLSLRNVSGHDVTCEIEHLSIDGKMRITY  
GEKSLFSLQITEHVLKAVAAFLLGFLVPCITVLIICIRQKTSKPPPEDEIQDTSDESEASLSLNLNMNISQ  
ET

>catla\_WA\_01

MANMEIQTIFVLILLSPRITMWTDYQTVNVLAYTRMMENGSIDQAVVVLVNEATFAYFDQANKT  
FVLRPSASAGFSVLENGDQSFCEMNEVLGAGFYRQTDYLEKLEKQETNSSKSLVLRPSVNVYTEFPEQQ  
GKANILYCYATGFYPGDIEINFYLNQKSGVKAETS DLMYGEDWTFRVYKYMNITPWYGDKYTCE  
VRHSSMPEPKMTWRPEFSASTSHLYWAYS LPPGILLGIMVSVLILRRKWH

>catla\_WB\_01

MLVFLLTMAFFNTILGAEHAYQQFIGCAFNNNEGQVSRFWRYGYDGRDIMYVDLAKEAVVATSEPG  
QLLAEERKSKEYIKRKEARLVKVCSAVKTVFLKSNNLSRAAKPAVYVSSGGEKNQEYLKCVVHG  
FYPNVIKVRWTKNRRPIYFGVSTTGILPHKDGTFQMTSYLSLSNVSTHDVTCEIEHLSIDGKLEKIDYG  
EKSLFSLQITEHVLKAVAAFLGFLVLPVCLTLLFICIRQKTRKAPENEITDTSDESEASLSLNLNMNISQ  
ET

>tench\_WA\_01

MANTETFQTFVMMILLSPQITMWTDYQTVNVLAYTRMRENGSIDQAVVVLVNEATFAYFDQEK  
KTFVLRPSASAGFSVLKGSERSFCMNEVLGAGFYRQTNYLEKLEKKEETKSSKALLVRPSVNVYTEFPEE  
EGKANVLYCYATGFYPGDIEINFLKGHKSIVKVETS DLMYSKDWTYRVYKYTTITPQTGDEYTCE  
VRHRSMAEPTMKAWRPKFSAPTSHLYWVYSLPLGILLGIMTSVLILRRKQRS

>tench\_WB

EHAYQQFIGCSFNNEGQEGRFWLYGYDGRDIMHVDLVKEAVIATSEPGQLLAEERKSKEYIKRKE  
RLVKLCSAVKTVFLKSNNLSRAAKPAVYVSSGGEKDQEYLKCVVHGFYPNVIRVRWTQKGRPVY  
FGVSTGILPHRDGTFQMTSYLSLINMSAHGVTCEIEHLSLGGILRKYEAKSQITEHVLWAMAFL  
LGAFALPVFLTLLFRKRQTTKPPEDKTKDTSRSEASLSLNLNMNMSQET

>grass\_carp\_WA\_01

MANMEILPVRISVLTLLYPQIITMWTDYTVNVLAYTRMMGNGSMDQTVVVLVNDISIFAYFDQE  
NKTFALRPSASAGFSVLEKRDSIFCLGEVTKGFYRQAEYLDKLEETNSSKPLLVRPSVSVYTEFPEE  
EGKANVLYCYATGFYPGDIEINFLNKRKSIVKVETS DLIYSKDWTFRVYKYMTITPRTGDEYTCEV  
RHSSMAEPKIKTWRPEFSASTSHLYWACSLPLGILLGIMTSVLILRRKQRSLL

>grass\_carp\_WB\_01

MLAFFLIVTFHEIILGAEHAYQQFIECAFNSQGQVDHTWNYGYDGGKDIMHVLDLVKKTVIATSEPG  
KMLEEERKHIEYIKRKEEKLKMCVSAVKTVFLKSNNTLSRAAKPAVLLSAGGEQDQEYLKCVVHG  
FYPNVIRVRWTQKGRPVYFGVSSTGILPHRDGTFQMTSYLSLNNMNADGVTCEIEHLSLDGILRKT  
YEEKSQITEHVLWATVAFFLGFALPVFLTVIFILIRKQTTEPPEDTSDGSKASLSLNLNMNMSQET

>fathead\_minnow\_WA\_01

MSDMKILTVRASVLTLLLYPQIITMWTDYHTVNVLAYTRMMGNGSMDQAVVVLVNDISIFAYFDQ  
ENKTFALRPSASAGFSVLEKRDSIFCLGEVTKGFYRQAEYLEKLKEETNSSKPLLVRPSVNVYTEFPE  
EEGKANVLYCYATGFYPGDIEINFFQNGHKSIVKVETS DLMYSKDWTFR VYKYMIITPRTGDEYTC  
EVRHSSMAEPTIKAWRPEFSA AHTPHLYWACSLPLGVLLGIMTSVLILRRKWNSQL

>fathead\_minnow\_WB\_01

MLAFLIVAFHEIILGADEHAYQQFIECAFDSQGQVDHTWSYGYDGGKDIMHVDFVKKAVVATSEPG  
KMLEEERKHAEYIKKKEERLKMVC SAVKT VFLKSNNSLSRAAKPAV VLSAGGEQDQKYLKCVVH  
GFYPNVIRVRWTRKGRPVYFGVSSTGILPHRDGTFQMTSYLSLINMSAH DITCETQHLSLDGILRKT  
YEEKSQIIEHVLWAMA AFFPFLAGFLLPVLP TSLLLIRKRRHMTKPPEDTSDTSEASLSLNLNMNMSQ  
ET

>roach\_minnow\_WA

MEILTVRTSVLTLLLYPQIITMWTEYHTVNVLAYTRMMGNGSMDQAVVVLVNDISVFAYFDQENK  
TFALRPSASAGFSVLEKRDSIFCLGEVTKGFYRQAEYLEKLKEETNSSKPLLVRPSVNVYTEFP EEEG  
KANVLYCYATGFY\*\*\*\*\*QNGHKSIVRVKTS DLMYSKDWTFR VFKYMTITPRTGDEYTCEVRH  
SSMAEPTMKAWRPEFSA AHTSHPYWAYS LPLGILLGFMTSVLILRRTWHSQL

>roach\_minnow\_WB

RTGYSQWNFEEHAYQQFIECAFDSQGQVDHTWCYGYDGGKDIMHVLDLVKKA VVATSEPGKMLEE  
RKHMEYIKRKEEKLKMCVSAVKT VFLKSNNSLSRAAKPTVLLSAGGEQDQKYLKCVVHG FYPNVI  
RVRWTQKGRPVYFGVSSTGILPHRDGTFQMTSYLSLINMSAHGVTCE TEHLSLDGILRKT YEEKSQI  
TE

>Amur\_ide\_WA\_01

MEILTVRTSVLTLLLYPQIITMWTDYHTVNVLAYTRMMGNGSMDQAVVVLVNDISVFAYFDQENK  
TFALRPSASAGFSVLEKRDSIFCLGEVTKGFYRQAEYLEKLKEETNSSKPLLVRPSVNVYTEFP EEE  
GKANVLYCYATGFYPGDIEINFFQNGHKSIVKVETS DLMYSKDWTFR VYKYMTITPRTGDEYTCEV  
RHSSRAEPTMKAWRPEFSA AHTSHLYWAYS LPLGILWGIMTSVLILRRTWHSQL

>Amur\_ide\_WB\_01

MLAFLIVAFHEIILGAEHAYQQFIECAFDSQGQVDHTWRYGYDGGKDIMHVLDLVKKA VVATSEP  
GKMLEEERKHMEYIKRKEEKLKMCVSAVKT VFLKSNNSLSRAAKPAV VLSAGGKQDQKYLKCVV  
HGFYPNVIRVSWTQKGRPVYFGVSSTGILPHRDGTFQMTSYLSLINMSAHGVTCE TEHLSLDGILRK  
NYEEKSQITEHVLWAMA AFFLGF TLPVFLTLLFIWKRRHTTKPPEDTSDRSEASLSLNLNMNMSQET

>zebrafish\_WA\_13A

MEVFTVRASLLTLLLYPHIITWTDYHTVNLAYTRVMGNGSIDQTVVVLVND AIFAHFDKANNTFA  
LNPTASAGFSVLEKRESIFCLGEVNKGFHRQTEYLEKLK KETKSSKTLFVRPSVIMYAEFP EEEGKA  
NVLYCYATGFYPGDIDIRFFLNGQKSTAKLETSDLMYGEDWTFR VFKYMKITPQTGDEYTCEVRHS  
SMSEPKITVWRPEFSSSTSHPYWAYTTALGVMSGIGTSTLILKRKHCSQL

>zebrafish\_WA\_01

MEVFTVRASLLTLLLYPHIITWTDYHTVNLAYTRVMGNGSIDQTVVVLVND AIFAHFDKANNTFA  
LNPTASAGFSVLEKRESIFCLGEVNKGFHRQTEYLEKLK KETKSSKTLFVRPSVSIYAEFP EEEGKAN

VLYCYATGFYPGDIDIRFFLNGQKSTAKLETSDLMYGEDWTFRVFKYMKITPQTGDEYTCEVRHSS  
MSEPKITVWRPEFSSSTSHPHYWAYTAALGVMLGIGTSTLILKRKHCSQL

>zebrafish\_WA\_02

LTLLLCPHIIITWTDYHTVNILAYTRVMGNSSIDQTVVVLVNDAlFAHFdKANNTFALNPTASAGFS  
VLEKRESIFCLGEVNKGFHRQTEYLEKLKkETKSSKTLFVRPSVSIYAefPEEEGKANVLYCYATGF  
YPGDIDIRFFLNGQKSTAKLETSDLMYGEDWTFRVFKYMKITPQTGDEYTCEVTHSSMSEPKITVW  
RPEFSSSTSHPHYWAYTTALGVMLGIGTSTLILKRKHCSQL

>zebrafish\_WA\_03

MEVFTVRASLLTLLLYPHIIITWTDYHTVNILAYTRVMGNgsIDQTVVVLVNDAlFAHFdKANNTFA  
LNPTASAGFSVLEKRESIFCLGEVNKGFHRQTEYLEKLKkETKSSKTLFVRPSVIMYAefPEEEGKA  
NVLYCYATGFYPGDIDIRFFLNGQKSTAKLETSDLMYGEDWTFRVFKYMKITPQTGDEYTCEVRHS  
SMSEPKITVWRPEFSSSTSHPHYWAYTTALGVMLGIGTSTLILKRKHCSQL

>zebrafish\_WA\_04

LCPHIIITWTDYHTVNILAYTRVMGNgsIDQTVVVLVNDAlFAHFdKANNTFALNPTASAGFSVLEK  
RESIFCLGEVNKGFHRQTEYLEKLKkETKSSKTLFVRPSVSIYAefPEEEGKANVLYCYATGFYPGDI  
DIRFFLNGQKSTAKLETSDLMYGEDWTFRVFKHMKITPQTGDEYTCEVRHSSMSEPKITVWRPEFS  
SSTSHPHYWVYTTALGVMLG

>zebrafish\_WA\_05

MEVFTVRASLLTLLLYPHIIITWTDYHTVNILAYTRVMGNgsIDQTVVVLVNDAlFAHFdKANNTFA  
LNPTASAGFSVLEKRESIFCLGEVNKGFHRQTEYLEKLKkETKSSKTLFVRPSVIMYAefPEEEEEKa  
NVLYCYATGFYPGDIDIRFFLNGQKSTAKLQTSDLMYGEDWTFRVFKHMKITPQTGDEYTCEVRHS  
SMSEPKITVWRPEFSSSTSHPHYWAYTAALGVMLGIGTSTLILKRKHCSQL

>zebrafish\_WB\_13B

MLAFLlIVSFHEVILGADEHAFQQFIECAFNSQGGQVDRSWRYGYDGKDVMHVDLATETVVGtSEP  
GKRLAEERKSTEYIRRKEEKLKIVCSAVKTVFLKSNNTLSRAAKPTVLLSNGGQQQEYLKCVVRG  
FYPNVIRVRWTQKGKPIFFGVSTTGTLPHTDGTFQMTSYLSLGNMTAHGVTCEIEHLSIDGKLRKNY  
GDNPWILSQITVAVVAFILGFVCTIAVIFVWKRHQttKSHDDETNGASDESEASLSLNVMNISQET

>zebrafish\_WB\_01

MLTFLlIVSFHEVILGADEHAFQQFIECAFNSQGGQVDRSWRYGYDGKDVMHVDLATETVVGtSEP  
GKRLAEERKSTEYIRRKEEKLKIVCSAVKTVFLKSNNTLSRAAKPTVLLSNGGQQQEYLKCVVRG  
FYPNVIRVRWTQKGKPIFFGVSTTGTLPHTDGTFQMTSYLSLGNMTAHGVTCEIEHLSIDGKLRKNY  
GDNPWFLSQITVAVVAFILGFVCTTAVIFVWKRHQttKSHDDETNGASDESEASLSLNVINISQET

>zebrafish\_WB\_02

MLAFLlIVSFHEVILGADEHAFQQFIECAFNSQGGQVDRSWRYGYDGKDVMHVDLATETVVGtSEP  
GKRLAEERKSTEYIRRKEEKLKIVCSAVKTVFLKSNNTLSRAAKPTVLLSNGGQQQEYLKCVVRG  
FYPNVIRVRWTQKGKPIFFGVSTTGTLPHTDGTFQMTSYLSLGNMTAHGVTCEIEHLSIDGKLRKNY  
GDNPWILSQITVAVVAFILGFVCTIAVIFVWKRHQttKSHDDETNGASDESEASLSLNVMNISQET

>zebrafish\_WB\_03

EHAfQQFIECAFNSQGGQVDRSWRYGYDGKDVMHVDLATETVVGtSEPGKRLAEERKSTEYIRRKE  
EKlKIVCSAVKTVFLKSNNTLSRAAKPAVLLFSNGDQGGQEYLKCVVRGFYPNVIRVRWTQKGRPV  
YFGVSTTGILPHTDGTFQMTSYLSLGNMTAHGVTCEIEHLSIDGKLRKNYRDNPWFRSQITVAV

>zebrafish\_WB\_04

EHAQQFIECAFNSQGVDRSWRYGYDGKDV MHVDLASETVVGTSEPGKRLAEERKSTEYIRRKE  
EKLKIVCSAVKTVFLKSNNTLSRAAKPAVLLFSNGDQGGQEYLKCVVRGFYPNVIRVRWTQKGRPV  
YFGVSTTGILPHTDGTQMTSYLSLGNMTAHGVTCEIEHLSIDGKLRKNYRDNPWFRSQITVAVVA  
FILGFALPMCPTAVMFVRKRHYQTTKSHDDETNGASDESEASLSL SVMNISQET

>zebrafish\_WB\_05

MLAFLLI VSFHEVILGADEHAFQQFIECAFNSQGVDRSWRYGYDGKDV MHVDLATETVVGTSEPG  
KRLAEERKSTEYIRRKEEKLKIVCSAVKTVFLKSNNTLSRAAKPTVLLSNGGQGGQEYLKCVVRG  
FYPNVIRVRWTQKKGPIFFGVSTTGTLPHTDGTQMTSYLSLGNMTAHGVTCEIEHLSIDGKLRKNY  
GDNPWFLSQITVAVVAFILGFVCTTAVIFVWKRHQTTKSHDDETNGASDESEASLSL NVMNISQET

>brown\_ghost\_knifefish\_WA\_01

MMSLKT FMLVLLKIPLIMMWDYQMVNVLAYTRMRSNGSVDQGVVVLVND AIFAYFDQKIKTFV  
LRPSASAGFSALEYSDRSFCMNEVLRGFYRQQEYLSKLKEHAHVATSPFLRPSVNVYVQFPVVEGQ  
ANVLYCYATGFYPGDIEITFFHNGRMSEVEGVLSDL MYGDNWTFRIYKYMVISPPQGD EYVCQVK  
HSSMAEPKVSEWRPEFPPTASFWAFGLASGVILGFVISGLLIR

>brown\_ghost\_knifefish\_WB\_01

MAGIMMFL LFACVLNAWSSIGADENAYQQFIGCAFNSTGQVGHFWRYGYNSKDIMHIDL VKETM  
VSTSNAGRFLAEERKSVEYIHSKQERLRKVC SAVQTVFLLSNSSLSRAAKPTVHVRVQGEQGK GFL  
MCQVHGFYPNVIRVQWTRQGKSVYYGVSTAGILPHKDGTFQMTSYLSLGNSSAHGVT CNVEHISF  
GGKMRATLEERTILLSTAVTVGAFLAGLVLPVGT VVVVIRFTRKRAPIQNE DVSNEHSEDSGT PPS  
MGLLL

>black\_ghost\_WA\_01

MMSLKT FMLVLLKVPIIMMWDYQMVNVLAYTRMRSNGSVDQGVVVLVND AIFAYFDQKNKTF  
VLRPSASAGFSALENTDRSFCLENEVLRGFYRQQEYLSKLKEHADVATPPFLRPSVNVYVQFPVAEG  
QANVLYCYATGFYPGDIEITFFHNRRMSEVKGVLSDL MYGDKWTFRIYKYMVISPPQGD EYVCQV  
KHSSMAEPKVSEWRPEFPPTPTSF FWAFLASGIILGFVISGLLIRNV

>black\_ghost\_WB\_01

MAGIMMFL LFACVLNAWSSIGTDENAYQQFIGCAFNSTGQVGHFWRYGYNSKNIMHIDL VNETMV  
STSNAGHFLAEERKSVEYIHSKQERLRKVC SAVQTVFLLSNSSLSRAAKPAVHVRVQGEQGKEFLM  
CQVNRFYPSVIRVQWTHQGESVYYGVSTTGILPHKDGTFQMTSYLSLGNLSAHGVT CNVEHISFAG  
KMRATLEERSILLSTGVT VGSFLAGLVLPVGT VVVVIRFTRKRAPIQNE DASNEHSEDSGT PPSMSL  
LL

>duckbill\_knifefish\_WA

TFMLVLLKVPIIMMWDYQMVNVLAYTRMRSNGSVDQGVVVLVND AIFAYFDQKNKTFVLRPSA  
SAGFSALEYSDRSFCMNEVLRGFYRQQEYLSKLKEHADVATSPSLRPSVNVYVQFPVAEGQANVL  
YCYATGFYPGDIEITFFHNGRMSEVEGVLSDL MYGDNWTFRIYKYMVISPPQGD EYVCQVKHSSM  
AKPKVSEWRPEFPPTPTSF FWAFLASGIILGFVISGLLIRNV

>duckbill\_knifefish\_WB

RFLAEERKSVKYIHSKQERLMKVCSAVQTVFLLSNSSLSRAAKPAVHVRVQGEQGKEFLMCQVHG  
FYPNVIRVQWTRQGKSVYYGVSTTGILPHKDGTFQMTSYLSLGNSSAHGVT CNVEHISFEGKMRAT  
L

>glass\_knifefish\_WA

YQTVNILAYTRMRSNGSVDQGVVVLVNDASFAYFDQTNKTFVLRPSASTGFSVLEDKDRSFCMYE  
VLRGFYRQQEYMSKLMYTDVATPPFVRPSVNVYAQFPVAEGQANILYCFATGFYPADIEITFFING

RLSVAEGVTSDLMYGDEWTFRIYKYMAISPRPGEEYACQVKHSSMAEPKDSVWRPEFPASTLGSL  
WAFGMASGLICGIVISGLLVRRF

>Mexican\_tetra\_WA\_01

MSRLTFILTLQVPAVLLWTDYQTVNIQAYTRIRSNGSVDQGVVVLVNDAlFAYFDSGNKTFVLRPS  
ATMGFSVLGESDRTFCLYEVLHGFYRQKDYLSKLREKTGGTKPLLVRPSVNVYPQFPVTEGQANV  
LYCYATGFYPGDIEINFFLNGRPSAEDGIMSDLMYSEDWTYRVYKYMAITPRPGEEYSCEVKHSSM  
AEPKMSLWRPEFPAFTPGFSWIFGLIPGLVCGIIVSAVLFRRKLFHFQL

>Mexican\_tetra\_WB\_01

MADIMLFLMLVCALIVQPSLCADENAYQQFIGCAFNSQGQADHLWRYGYNGVDVMHIDLQRETM  
VSTSEAGHFLTEERKSVTYIKSKEERLKKVCSAVQTVFSLSNSSLSRAVKPSVHVRMGGEAGREFLR  
CLVHGFYPNIIRVQWNRNGRPIFFGTSTTGILPHKDGFMFQMTSYLSLGNTSTHGVTCEVEHISIDGK  
MKATLETNPIHLLFSVVIADVAGLAGCICPVGITTLIIYLRNKTASKPLNTTNDSSSEASETPPSMSLMH  
LPSEI

>tambaqui\_WA

MSLKSFVLMMLQAPAVLLWTDYQTVNIQAYTRMKGNGSVDQAVVVLVNDATFAYFDKAKKTFV  
LRPSATTGFSVLDDSDQTFMAYEVLHGFHRQEEYLSKLREQTGA VRPPLVRPSVNVYAQFPVAEGQ  
ANVLYCYATGFYPGDIEINFFLNHGPSVDKGITSDLMYGDDWTYRVYKYMAITPRPGEEYTCEVEH  
SSMAEPMSTWSEYVMINSTV

>tambaqui\_WB\_01

MAATLTSLLLIVLNARPSLGADENAYQQFIGCAFNSRGQVGHFWRYGYNSKDIMYIDLVREAMV  
STSETGHFLTEERKSVEYIKSKEKRLRKLCTAVQTVFSLSNSSLSRAVKPAVHVKLREEKGREFLLC  
LVHGFYPNVIRVRWTRDGKNIYYGTSTTGVLPHKDGTFQMTNYLSLSNTSVHGVTCEIEHISIDGK  
MRATLEETPSLLLSVVLAAAFAFFAGIAFPVGTVTLIIRLRKQKPKD TTNDSSSEASTPPSVSLMHLQA  
ES

>African\_coelacanth\_WA\_1\_01

MELLRTWPFWGFLLWGPLLVTVGVEEDGDFFGMHVLTADMDSVSFGVAVVVSYNDESIAHWDQEK  
EDTVMEIPGIQHHTMTELFNLLINNRRERAYHFHEEVKTFVYPHVPKPPNVMPDIYLYMENPITFGKKN  
RLNCYAMNFFPPNLRAVLLNENPLLKVKVAIWDLTFNLGGNLQLLSVEVVPKLRDSYSCTMEH  
LKLQRNRTIVLDAQEPYKPAADHSETAALAIGIIVGIIGMLVGVLIAXH

>African\_coelacanth\_WB\_1\_01

MPLAGKGLVLWVLLSVLFFSQLPNVQGVFNYLQHQQFFCAEDSSTNASFCRWLVSYDSRKLFFYLD  
SRVNRFPVPLQQFLEKKMEEKNSNKLTFQQYNSICQLACEYKEKVLASAKATLNRKVPPMVNIGIM  
KDEEIQTDTLSLICSIRGFYPQAISTTWLRNGEDIKSETFTTGLLPNVDKTFSLDLYVDIVESDWNEYT  
CQVEHSGLTEPLHLTLDRKQP GKSGIIGAVFAAVGVIVMVTGLIVRIRRNNGSDAAETISINSISEMVP  
MS

>West\_African\_lungfish\_WA\_2\_01

MATFQGFGLLLWLLFWINMADATFRFRKLEVL PFTTLD MKTIQMQLAILVNDVPIGLFDQHENKF  
LIRLNISEEACNKMQLAVLYMREAKGNMDWQKVLIRMMETKQKVHPPLEPPSVSMYSEKPYVP  
GQNNTIYCYATGFYPPEIDIVFFENGHNFAGKVYASDIAFSEDWRFKIMKFIHVVPQQTTLYSCKVN  
HISFKQPRELTLGNSMDHARVPVLFIVSVPCALIGIPLGIYFLKDSRLSSFR

>West\_African\_lungfish\_WB\_2\_1\_01

MLCSCCGIALGLVLFSLQNNACGGDHVREAMNTLQFRMGCSMDQGKMKYFWQRGYNQKNIKR  
YDYTEQRAIMEHECVKDEVEADNRNPILRKSQRQETA EKFCQKARSIFDEL PVHLGELGNNNSVSISLE

NQGKENYLVCFVRGFHPSNIKVTWLKDGKEELYGVTTTGVPLPLRDGTFVMKMYLFLADTTKGLYI  
CQVEHESLKGKIRVLWEQKSEVQSPDSIIWITFILALLLILLACISKIQKDHQTATTKIPEDRKEMD  
KLCSSSMGVGNEEE

>South\_American\_lungfish\_WA\_1\_01

MCGKILNSLSAAILWSSALLLLAEKDTFFFDAYLFSSDNDVSKNNFQLSVSVNGLELMQWDVTNQT  
FLEQIGGMEEVMPFLNSVVRNLKGTMALHQHIFQVMSEETHSAPAPNELPDIYSYFEKPIKFGKKN  
NLSCFAVRFYPPSIQINILKNNVVIPSEIKPSGAMFDINWKQMLKSAEVTMPKGDYSCSVEHLILK  
QTRNVTIEPKPEYIPQVDHSETIVCAAGTIVGITGLLLGIFLIRKQHTNRDVM

>South\_American\_lungfish\_WB\_1\_01

MFTNRYACQWQKFYLSFLIILIFAFQCELHFLHHHVHCTSFNNTGNKTLSEVAAYDSLTIHVDNEN  
VGIAATSPYVHEEIESFNRRKDLIKRYNNIMHDVWPFLDLIASLGNSTLDRKVAPSVTIVVDPVDHGI  
LNLACYIHGFYPQNIIEVFWLQNGEDITEKMATTDILPNTDNTFSLITYVDAEENKHKYTCMVKHS  
SVTNGISATVDFNQGFYGGVVLALVGIAGMTGIILRYRLKALRVCMQRRNLGPAETVHRTQ  
PTRQELEQLDGPDSLHENVFSSSNYEAYLTIQDIPVIGLTSDIPLDQSTSTTVE

>Australian\_lungfish\_WA\_1

MRSALCVVWSLVLMSVAEEDGYVFDVYFITADNNSNAPVIHSSVAVNGIEIRWDEKKQKVLQQIG  
GLEELMPFVNNLLYGNIRGALKEHNEVVKLMTEATHNSVPPNELPDIYLYFEKPIKFGKKNLSCFII  
RFFPLAVQIEILRNNISIPGEIKSFRLMFDDDDWKQILKSMEVVPFRAGDIYSCSVEHLILRQKKLVTLG  
KLIWAYNYV

>Australian\_lungfish\_WB\_2\_2

MILHKLVLFLCILLHRKDACGEATSTFQYRAGCVLEKGRNTYFWRSSYNNKDIEHYDYERQCLVA  
DYPSAKDRAEYKSPSFPYWNLLITDLCSSAKKLFDELPAELGRLERSVSVSLETKEKDKYLE  
CLVHGFHPSYINVTWLRDQKEQFYGVTSGLPLKDGTFHIRKYLPIGDSVGGSYACQVEHESLVEA  
ILVHWDPVRKTSFLEKILGIPVLIIGVCFPIFGYIYKRKFKRGRKETSSISTSSLEGNPQAAPLNPEEN  
TD

>Chinese\_salamander\_WA\_01

MNSLRITIAWMCLLAANSCQQGIKDLFLEAFTSTGSPGASNLTVALADTVVAAAYSGTNGTFQFPP  
SQLEALGRFAANQIITNQTVAFHQHSMDTLCQRSNCSDPVFVFPDVQFYPEIPVVLGQENRLLCFLK  
EFFPPEVSVAFKNGKPFGRGQIQSSELTFRNWTQVLKSITVEPGAGDTYSCTVEHGQRQSHRDL  
FEKLPMTVENNAHIVVLA VGLAVGILGFAMGLLLFLQYSTRNPYMQWLNRNSVSS

>Chinese\_salamander\_WB\_01

MFSHTWIPLLIHSSISTADAHIFQQTLGCSTRSASFPEITECWWRAAYNGEEVWKFDDLNSTSVYFS  
PLMVEDERLFLHFRNSILPSGVDIVASLQSFMNQAPARETVTPNVTVSLADTEVGAPLKSLLCRVSE  
FYPPDLNVTWLDGSLALGNGLKEPVILPNSDGTFTTSCIPFNSSHPQGGHYSCTVQHLSTLLGL  
VAKWEAPPLDNRMVKAEMVIGLAGLVGIVFLSSALIYHGCIREGRISSECKSEDRGMEISEIDTVSE  
G

>Hokkaido\_salamander\_WA\_01

MNSLRITIAWICLLAANSCQQGIKDLFLEAFTSTGSPGASNLTVALADTVVAAAYSGTNGTFQFPPS  
QLEALGRLAANQIITNKTVAFHQHSMETLCQRSNCSDPVFVFPDVQFYPEIPVVLGQENRLLCFLKE  
FFPPEVSVAFKNGKPFMGQIQSSELTFRNWTQVLKSITVEPGAGDTYSCTVEHGQRQSRRLAC  
GKLPMTVENNAHIVVLA VGLAVGILGFAMGLLLFLQYSTRNPYMQWLNRNSVSS

>Hokkaido\_salamander\_WB\_01



MFSLTWIPLLHISSRSTADAHIFQQTLGCSTRSASFPEITECWWRAAYNGEEVWKFDLLNSTSVYFS  
PLMVEDERLLLRRHFRNSILPPGVDIVASLQSFMNQPARETVTPNVTVSLVNTEVGAPQKSLCCRVSE  
FYPPDLNVTWSLDGLALGNGLKEPVILPNSDGTFTTSCIPFNSSHPQGKRYSCTVQHLSTPLGLV  
AKWELPPSENRMVKAEMVIGILAGLAGIIFLTSALIYHGCIKGRISSCCKSEDRGMEISEIDTASEGA  
SASA

>tiger\_salamander\_WA\_01

MNSLPASLCMCILTIVVRCQGGSKNIQLAAFTSTDSPAASNLTLLADTVVAAYYDGDSTDTFQIPDT  
GLKDTVQTFAHFFPMESVSNFHQMVMKDMCMKINCSDPVSVPFPEVQFYIEAPVVLGQENRLLCFL  
KGFPPPEVRVSFLKNEQPPGQMOSSELIFGRNWFQVLKYILVKPQAEDTYS CIVEHG YLQSRQNL  
TWGRPVLENKTHVTVLIVGLTVGFLGFVVGLILCIHGKNLKCLARNPYQR

>tiger\_salamander\_WA\_02

MNSLPAYLCMCILTIVVRCQEGSKNIQLAAFTSTDSPAASNLTLLADTVVAAYYDGRNTTFQIPD  
TGLKDTVQTFAHFFPMERVSNFHQMVMKDMCMKINCSDPVSVPFPEVQFYIEAPVVLGQENRLLCF  
LKGFFPEARVSFLKNGQPPGQMOSSELIFGRNWFQVLKYILVKPQDEDTYS CIVEHG YLQSRQN  
LTWGRPVLENKTHVTVLIVGLTVGFLGFVVGLILCIHGKNLKCLASNPYQR

>tiger\_salamander\_WB\_01

MPPLAWITILLALCCQFTAGSQIFQQLEIECSKSPSSPATPQCWWRAAYNREQLWDFNLLNSNIDLLL  
LDLNRFRGLPLEYLLRELQYPLQNTPFANVFMSLTAKEIVAPRV TINA EETE VGAPLY TLCCRATG  
FYPPNINVTWFLDGSPLAHDHGMKELVILPNSNGTFQTTSCMPFSISHTQAKNYLCAVQHISTPEGL  
NATWEAPGLEEHKAELAIGILAGLAGVFFASSALVWHGCKKGRITSCWKHEGLMVEISEMAAAS  
EAASPSV

>tiger\_salamander\_WB\_02

MPPLAWITILLALSCPFTAGSQIFQQLEIECSKSPSSPATPQCWWRAAYNREQLWDFNLLNSNIDLLL  
DLNRFRGLPLVYLLRELEYPLQNTPFANVFMSLTAKEIVAPHVTINA EETE VGAPLY TLCCRATGF  
YPPNINVTWFM DGSPLAHDHGMKELVILPNSNGTFQTTSCMPFSISHTQAKNYLCAVQHISTPEGLK  
ATWEAPGLEEHKAELAIGILAGLAGIFFSSALVWHGCKKGRVTSCWKHEGLMVEISEMAAASEA  
ASPSV

>axolotl\_WA

MNRLPASLCMCILTIVVRCQEGSKNIQLAAFTSTDSPAASNLTLLADTVVAAYYDGDSTDTFQIPD  
TGLKDTVQTFANFFPMERVSNFHQMVMKDMCMKINCSDPVSVPFPEVQFYIEAPVVLGQENRLLCF  
LKGFFPPPEVRVSFLKNEQPPGQMOSSELIFGRNWFQVLKYILVKPQAEDTYS CIVEHG YLQSRQN  
LTWGRPVLENKTHITVLIVGLTVGFLGFVVGLILCIHGKNLKCLASNRYQR

>axolotl\_WB\_01

MPPLAWITILLALSCPFTAGSQIFQQLEIECSKSPSSPATPQCWWRAAYNREQLWDFNLLNSNIDLLL  
DLNRFRGLPLEYLLRELQYPLQNTPFANVFMSLTAKEIVAPHVTINA EETE VGAPLY TLCCRATGF  
YPPNINVTWFLDGSPLAHDHGMKELVILPNSNGTFQTTSYMPFSISHTQAKNYLCAVQHISTPEGLN  
ATWEAPGLEEHKAELAIGILAGLAGIFFASSALVWHGCKKGRITSCWKHEGLMVEISEMAAASEA  
ASPSV
